# Supplementary material for: A purified diet affects intestinal epithelial proliferation and barrier functions through gut microbial alterations
Source: Int Immunol. 2024 Jan 23;36(5):223–40. doi: 10.1093/intimm/dxae003 (PMC10989658; doi:10.1093/intimm/dxae003)
Supplement: dxae003_suppl_Supplementary_Tables [file dxae003_suppl_supplementary_tables.pdf]

**Table S1. Nutritional formula of CD and PD**

| Diet               | CD*                           | PD |
|--------------------|-------------------------------|----|
| Protein (gm%)      | 25.05                         | 20 |
| Fat (gm%)          | 4.77                          | 7  |
| Carbohydrate (gm%) | 49.82 (Nitrogen Free Extract) | 64 |
| kcal/gm            | 3.424                         | 4  |

\* Average of periodic analysis in 2022

Table S2. Differentially expressed genes between CD and PD epithelium

| A) List of genes downregulated in the ileum of PD-fed mice |            |                |                  | B) List of genes upregulated in the ileum of PD-fed mice |            |                |                  | C) List of genes downregulated in the duodenum of PD-fed mice |          |                |                  | D) List of genes upregulated in the duodenum of PD-fed mice |            |                |                  |
|------------------------------------------------------------|------------|----------------|------------------|----------------------------------------------------------|------------|----------------|------------------|---------------------------------------------------------------|----------|----------------|------------------|-------------------------------------------------------------|------------|----------------|------------------|
| ENSMUSG                                                    | Gene names | log2FoldChange | adjusted p-value | ENSMUSG                                                  | Gene names | log2FoldChange | adjusted p-value | ENSMUSG                                                       | SYMBOL   | log2FoldChange | adjusted p-value | ENSMUSG                                                     | SYMBOL     | log2FoldChange | adjusted p-value |
| ENSMUSG000000071115                                        | Saat1      | -5.696143481   | 9.37E-16         | ENSMUSG00000006072                                       | Cyp17a10   | 7.943393944    | 2.43E-44         | ENSMUSG000000003053                                           | Cyp2c29  | -5.260788045   | 6.37E-60         | ENSMUSG000000042266                                         | Adad2      | 4.259028148    | 2.46E-05         |
| ENSMUSG000000030268                                        | Plel1      | -5.426979892   | 2.39E-10         | ENSMUSG0000000041536                                     | Serpinad3  | 5.089578932    | 2.76E-37         | ENSMUSG000000061906                                           | Ugc2b38  | -4.932813148   | 0.000789959      | ENSMUSG000000037593                                         | Ravr       | 3.497563341    | 0.008211049      |
| ENSMUSG000000079547                                        | H2-Dbm1    | -4.941358883   | 2.13E-166        | ENSMUSG0000000050201                                     | Otpc2      | 4.648068882    | 4.11E-05         | ENSMUSG000000002315                                           | Cyp1a1   | -4.73679181    | 1.23E-09         | ENSMUSG000000004421                                         | Lama3      | 3.262672127    | 1.49E-13         |
| ENSMUSG000000079180                                        | Mpbx2      | -4.75679766    | 4.06E-35         | ENSMUSG0000000025905                                     | Otpk1      | 4.620841814    | 1.34E-16         | ENSMUSG0000000029762                                          | Akr1b8   | -3.918581885   | 4.72E-09         | ENSMUSG000000046329                                         | Sltc2a523  | 3.139049367    | 0.004528799      |
| ENSMUSG000000068349                                        | Gmi1       | -4.609812713   | 4.54E-05         | ENSMUSG0000000027875                                     | Hmgcs2     | 4.426576549    | 3.97E-42         | ENSMUSG0000000042598                                          | Fwvz2    | -3.888652907   | 1.16E-21         | ENSMUSG0000000026249                                        | Serpine2   | 3.082927176    | 0.046749939      |
| ENSMUSG000000073373                                        | Gimpw7     | -4.537923337   | 5.37E-10         | ENSMUSG0000000051323                                     | Pozh19     | 4.412878289    | 3.56E-14         | ENSMUSG0000000025273                                          | Mpp3     | -3.835345042   | 0.00180626       | ENSMUSG000000015401                                         | Citm       | 3.049307175    | 0.007209185      |
| ENSMUSG000000035042                                        | Cd5        | -4.46707985    | 3.73E-63         | ENSMUSG0000000028571                                     | Cyp2j13    | 4.333945351    | 5.21E-06         | ENSMUSG000000063851                                           | Rnf1b3   | -3.818917455   | 0.00518228       | ENSMUSG000000067235                                         | H2-Q10     | 3.009335741    | 2.48E-39         |
| ENSMUSG000000004612                                        | Nkg7       | -4.369891062   | 6.72E-11         | ENSMUSG0000000021228                                     | Acoz3      | 3.951961052    | 0.001229375      | ENSMUSG000000026418                                           | Tnni1    | -3.696588941   | 0.000172223      | ENSMUSG000000050953                                         | Gja1       | 2.873491981    | 0.013632486      |
| ENSMUSG0000000023132                                       | Gzma       | -4.22180491    | 1.00E-82         | ENSMUSG0000000027801                                     | Tnnf4e4    | 3.682958924    | 1.76E-43         | ENSMUSG000000041193                                           | Pla2g5   | -3.57788612    | 2.41E-32         | ENSMUSG000000003949                                         | H3f        | 2.853030368    | 6.53E-11         |
| ENSMUSG000000015437                                        | Gzmb       | -4.170248926   | 4.06E-31         | ENSMUSG0000000106397                                     | Gm21049    | 3.635771818    | 3.76E-19         | ENSMUSG0000000025243                                          | Slc6a2b  | -3.516872202   | 8.21E-05         | ENSMUSG000000016494                                         | Disp14     | 2.728611176    | 0.001209708      |
| ENSMUSG000000076732                                        | Tgrc2      | -4.171545678   | 3.73E-18         | ENSMUSG0000000027961                                     | Lrrc39     | 3.602948677    | 1.53E-10         | ENSMUSG000000046807                                           | Lrrc75b  | -3.497259356   | 0.00505758       | ENSMUSG000000018848                                         | Dusp14     | 2.728611176    | 0.00184746       |
| ENSMUSG0000000024610                                       | Cd74       | -4.134496558   | 6.71E-101        | ENSMUSG0000000034687                                     | Fras1      | 3.576118979    | 1.89E-08         | ENSMUSG0000000037775                                          | Trat1    | -3.464783403   | 0.022779904      | ENSMUSG0000000023073                                        | Sltc10a2   | 2.727732897    | 2.45E-39         |
| ENSMUSG000000073421                                        | H2-Ab1     | -4.046034784   | 4.80E-130        | ENSMUSG0000000041828                                     | Abca8a     | 3.498572928    | 0.038399936      | ENSMUSG000000005763                                           | Cd247    | -3.460568887   | 0.010171617      | ENSMUSG0000000040181                                        | Fmo1       | 2.714469572    | 0.018345782      |
| ENSMUSG0000000053186                                       | Lhd        | -4.033524879   | 6.81E-11         | ENSMUSG0000000035279                                     | Ahnagp6    | 3.382653391    | 0.030717512      | ENSMUSG000000004151                                           | Etv1     | -3.457507378   | 0.001499941      | ENSMUSG000000059331                                         | Zfp85      | 2.679974687    | 0.012236827      |
| ENSMUSG000000036594                                        | H2-Aa      | -3.991245888   | 2.67E-155        | ENSMUSG0000000152224                                     | Cyp2j9     | 3.376845055    | 2.63E-11         | ENSMUSG0000000021222                                          | Sltc37a2 | -3.423449275   | 0.003269137      | ENSMUSG0000000034863                                        | Ano8       | 2.676383272    | 0.016284068      |
| ENSMUSG0000000031089                                       | H2-Ha      | -3.977614433   | 0.000962378      | ENSMUSG00000000272949                                    | Acoz1      | 3.222473449    | 1.10E-20         | ENSMUSG0000000030554                                          | Symm     | -3.401387536   | 0.015891634      | ENSMUSG000000028542                                         | Slc6a6     | 2.619760536    | 4.38E-07         |
| ENSMUSG000000075662                                        | Ly6a       | -3.733208083   | 4.87E-05         | ENSMUSG0000000054422                                     | Fabp1      | 3.2161508      | 2.86E-39         | ENSMUSG000000071359                                           | Resp3    | -3.39799283    | 8.36E-30         | ENSMUSG000000001014                                         | Icam4      | 2.619384366    | 0.013351547      |
| ENSMUSG000000004612                                        | Fut1       | -3.677222813   | 0.010643215      | ENSMUSG0000000024682                                     | Catf1      | 3.155779074    | 1.35E-06         | ENSMUSG000000069072                                           | Cyp4a10  | -3.317742105   | 2.43E-44         | ENSMUSG000000049555                                         | Tme        | 2.60540566     | 1.20E-10         |
| ENSMUSG0000000037095                                       | Lgr1       | -3.618628005   | 0.009187279      | ENSMUSG0000000043496                                     | Tnn3       | 3.022521674    | 0.01665332       | ENSMUSG0000000025002                                          | Cyp2c55  | -3.231214919   | 1.46E-47         | ENSMUSG000000005681                                         | Apoa2      | 2.596477204    | 9.04E-07         |
| ENSMUSG0000000040191                                       | Pla2g5     | -3.618278396   | 2.41E-32         | ENSMUSG0000000050907                                     | Ces2b      | 3.00382989     | 6.16E-20         | ENSMUSG000000003762                                           | Aqg2     | -3.04099913    | 1.56E-122        | ENSMUSG000000043673                                         | Kom3       | 2.58505267     | 9.94E-13         |
| ENSMUSG0000000001670                                       | Tat1       | -3.598790085   | 0.02170556       | ENSMUSG0000000056973                                     | Ces1d1     | 2.929956926    | 2.19E-36         | ENSMUSG0000000034984                                          | Cyp2b10  | -3.002852472   | 1.80E-39         | ENSMUSG000000009696                                         | Zfp96      | 2.544843475    | 0.000877699      |
| ENSMUSG0000000021020                                       | Ppp2r2c    | -3.558458731   | 0.035676384      | ENSMUSG0000000062515                                     | Fabp4      | 2.900606991    | 1.34E-07         | ENSMUSG000000007812                                           | Fybl2    | -2.997194708   | 1.37E-06         | ENSMUSG000000073094                                         | Slmnp      | 2.52952569     | 0.000369346      |
| ENSMUSG000000003391                                        | Ehm        | -3.553678148   | 0.038672983      | ENSMUSG0000000074639                                     | Rhm16f2    | 2.86310386     | 2.66E-25         | ENSMUSG000000002384                                           | Bmp8b    | -2.95176561    | 0.002773712      | ENSMUSG000000008949                                         | Rea2-9     | 2.469845269    | 0.004907303      |
| ENSMUSG0000000069324                                       | Rhm11b     | -3.510654401   | 0.020732792      | ENSMUSG0000000020620                                     | Abca6b     | 2.841445471    | 5.10E-07         | ENSMUSG0000000067239                                          | Cyp2c66  | -2.84020256    | 1.37E-93         | ENSMUSG0000000027995                                        | Ct         | 2.46621404     | 0.009175608      |
| ENSMUSG000000100150                                        | Gmi195b    | -3.467949416   | 0.000369662      | ENSMUSG0000000067229                                     | Cyp2c66    | 2.792211055    | 1.37E-93         | ENSMUSG000000004028                                           | Cd228    | -2.815460463   | 0.003408158      | ENSMUSG000000022187                                         | Ct         | 2.379536512    | 0.004129941      |
| ENSMUSG000000076499                                        | Sua2       | -3.449945254   | 4.95E-14         | ENSMUSG0000000066667                                     | Vtmn4      | 2.76362532     | 0.005376535      | ENSMUSG000000047992                                           | Dpk1c    | -2.892095509   | 0.02796791       | ENSMUSG000000059631                                         | 1500035N22 | 2.378520229    | 0.0176258        |
| ENSMUSG0000000021384                                       | Sua2b      | -3.449947796   | 0.023781545      | ENSMUSG0000000043446                                     | Qc2        | 2.755046326    | 0.000900878      | ENSMUSG000000055746                                           | Gedmo4   | -2.871733524   | 1.02E-19         | ENSMUSG000000042739                                         | Shc        | 2.369890544    | 0.0176E-05       |
| ENSMUSG0000000009654                                       | H2-Eb1     | -3.422245374   | 3.03E-156        | ENSMUSG0000000026354                                     | Qc2        | 2.746979729    | 3.56E-12         | ENSMUSG000000063635                                           | Glyt4    | -2.867118941   | 0.034994114      | ENSMUSG000000102416                                         | Sh3d1b1    | 2.359914014    | 0.005399292      |
| ENSMUSG0000000069600                                       | Gmi2       | -3.39822856    | 0.02678619       | ENSMUSG0000000029236                                     | Nm9        | 2.735887746    | 0.020580095      | ENSMUSG000000002986                                           | Cyrdn1   | -2.867118941   | 0.004117705      | ENSMUSG0000000032502                                        | Dck3       | 2.358942462    | 0.040982425      |
| ENSMUSG0000000055978                                       | Fut2       | -3.392095642   | 7.12E-20         | ENSMUSG0000000064140                                     | Tnn3b      | 2.733345648    | 6.80E-16         | ENSMUSG000000042986                                           | Nctm8    | -2.733986188   | 0.00549422       | ENSMUSG0000000054582                                        | Psep11     | 2.354716989    | 0.026847588      |
| ENSMUSG0000000027117                                       | Zap70      | -3.284198555   | 0.016319231      | ENSMUSG0000000035357                                     | Pret3      | 2.733026593    | 0.040463529      | ENSMUSG000000007058                                           | Mha1a    | -2.709150754   | 7.35E-31         | ENSMUSG0000000020492                                        | Shu2       | 2.298685257    | 0.010580194      |
| ENSMUSG0000000036222                                       | H2-Ea      | -3.258796158   | 8.44E-52         | ENSMUSG0000000056803                                     | Pret3      | 2.726761554    | 1.10E-28         | ENSMUSG0000000024265                                          | Ca14     | -2.61789123    | 0.01488203       | ENSMUSG000000073557                                         | Ppp1r12b   | 2.294255045    | 0.013807866      |
| ENSMUSG0000000027514                                       | Zfp1       | -3.252879515   | 0.00940158       | ENSMUSG0000000057671                                     | Aad3       | 2.702152233    | 8.15E-29         | ENSMUSG0000000074004                                          | Bqmn1    | -2.61789123    | 0.008593936      | ENSMUSG0000000032860                                        | Pch2y      | 2.28608978     | 4.29E-13         |
| ENSMUSG0000000030429                                       | Cd226      | -3.192590205   | 0.073            | ENSMUSG0000000051079                                     | Pas3       | 2.69147652     | 7.39E-06         | ENSMUSG0000000029603                                          | Pla2g1c  | -2.58717315    | 0.036163919      | ENSMUSG000000007584                                         | Hspat1     | 2.28461313     | 0.01454877       |
| ENSMUSG0000000036377                                       | Cd8a       | -3.167102916   | 1.70E-18         | ENSMUSG0000000056824                                     | Dcy        | 2.684646217    | 0.018943183      | ENSMUSG0000000033474                                          | Pla2g1c  | -2.567155015   | 0.001197951      | ENSMUSG0000000050761                                        | Lgnt       | 2.287724544    | 0.00E-15         |
| ENSMUSG0000000037649                                       | H2-DMa     | -3.146831369   | 1.56E-39         | ENSMUSG0000000060205                                     | Adh1       | 2.679304044    | 0.01873227       | ENSMUSG0000000030087                                          | Klf15    | -2.534787492   | 0.010435414      | ENSMUSG0000000037216                                        | Lgnt       | 2.266625713    | 0.035234992      |
| ENSMUSG0000000022504                                       | Ctita      | -3.138441147   | 2.06E-33         | ENSMUSG0000000074207                                     | Adh1       | 2.657323288    | 1.59E-168        | ENSMUSG0000000052374                                          | Actn2    | -2.479504202   | 0.048099969      | ENSMUSG0000000053825                                        | H2-T24     | 2.2604317      | 1.57E-06         |
| ENSMUSG000000102418                                        | Sh3d1b1    | -3.123440834   | 0.005399329      | ENSMUSG000000051746                                      | Wfak21     | 2.643202891    | 0.000299811      | ENSMUSG000000068900                                           | Klf12    | -2.467200678   | 0.026788152      | ENSMUSG000000043391                                         | 150009E071 | 2.249898584    | 7.04E-07         |
| ENSMUSG000000074137                                        | Cxcr9      | -3.078714532   | 3.12E-08         | ENSMUSG0000000022188                                     | Tch        | 2.641351214    | 0.001299841      | ENSMUSG0000000020653                                          | Klf1     | -2.466053675   | 0.017737349      | ENSMUSG000000095105                                         | Edmrnd     | 2.225459859    | 6.83E-09         |
| ENSMUSG000000022773                                        | Cy3bg3     | -3.078069881   | 0.00498526       | ENSMUSG0000000052415                                     | Tchh       | 2.635110388    | 0.048978647      | ENSMUSG0000000037579                                          | Km3b     | -2.463667612   | 0.001725862      | ENSMUSG000000077883                                         | Hsp111     | 2.220536378    | 0.01282466       |
| ENSMUSG0000000052374                                       | Actn2      | -3.078234057   | 0.048999968      | ENSMUSG0000000042812                                     | Fox1       | 2.631653831    | 0.00365416       | ENSMUSG0000000056203                                          | Gedmo2   | -2.434757082   | 0.00175082       | ENSMUSG0000000027196                                        | Pam1       | 2.19438618     | 0.007556482      |
| ENSMUSG0000000029204                                       | Rhuc       | -3.044478988   | 0.01527109       | ENSMUSG0000000021765                                     | Fat1       | 2.619562074    | 0.003692372      | ENSMUSG0000000071810                                          | Mpr2c    | -2.434524819   | 4.06E-35         | ENSMUSG000000106352                                         | 300343H07  | 2.09869136     | 0.00180467       |
| ENSMUSG0000000028217                                       | Pp2r1-ps2  | -3.018098902   | 0.00106784       | ENSMUSG0000000025726                                     | Slc28a1    | 2.548599558    | 2.03E-08         | ENSMUSG0000000042116                                          | Hkdc8a   | -2.427379338   | 0.01271405       | ENSMUSG0000000042216                                        | Sgpm1      | 2.082951805    | 0.001540994      |
| ENSMUSG0000000024863                                       | Mob2       | -2.984227896   | 0.001191412      | ENSMUSG0000000056569                                     | Mcp        | 2.553768527    | 0.00691414       | ENSMUSG000000005935                                           | Aqp3     | -2.417769996   | 4.13E-07         | ENSMUSG0000000051022                                        | Hsc1a1     | 2.077442002    | 0.00137127       |
| ENSMUSG0000000024963                                       | Mob2       | -2.969327471   | 2.90E-29         | ENSMUSG000000015401                                      | Citm       | 2.496383674    | 0.007209135      | ENSMUSG000000008890                                           | Bmp7     | -2.395337822   | 0.003875591      | ENSMUSG000000040711                                         | Sh3pzd2b   | 2.060609297    | 0.028016101      |
| ENSMUSG00000000504169                                      | Cesam10    | -2.946724093   | 1.05E-13         | ENSMUSG0000000042750                                     | Bea2       | 2.490218453    | 0.001765034      | ENSMUSG000000009899                                           | Salt     | -2.350678836   | 0.00698545       | ENSMUSG0000000027719                                        | Rgs7b7p    | 2.03624125     | 0.004571209      |
| ENSMUSG0000000040206                                       | Sua2       | -2.940018407   | 0.012161377      | ENSMUSG0000000027690                                     | Slc28a1    | 2.489854655    | 1.39E-150        | ENSMUSG000000005435                                           | Gsm1     | -2.408345029   | 2.04E-42         | ENSMUSG0000000023345                                        | Poc1a      | 2.077782024    | 0.009090661      |
| ENSMUSG0000000034634                                       | Ly6d       | -2.929225817   | 0.00506125       | ENSMUSG0000000047992                                     | Dpk1c      | 2.483936259    | 0.027867011      | ENSMUSG0000000026581                                          | Rnf1     | -2.34118968    | 0.027753045      | ENSMUSG0000000027119                                        | Rgs7b7p    | 2.03624125     | 0.004571209      |
| ENSMUSG00000000301773                                      | Kras       | -2.929070816   | 4.96E-08         | ENSMUSG0000000027887                                     | Sypl2      | 2.458113197    | 9.51E-05         | ENSMUSG0000000051735                                          | Rnf1     | -2.34118968    | 0.027753045      | ENSMUSG0000000032816</                                      |            |                |                  |

|                      |            |              |             |
|----------------------|------------|--------------|-------------|
| ENSMUSG000000000409  | Lck        | -1.906068651 | 0.004336286 |
| ENSMUSG00000002562   | Car2       | -1.901386335 | 4.49E-52    |
| ENSMUSG00000003428   | Thy1       | -1.893564808 | 0.010275434 |
| ENSMUSG000000096727  | Pamrb      | -1.891960068 | 0.010145    |
| ENSMUSG00000002375   | Pecam1     | -1.891385479 | 0.015247343 |
| ENSMUSG000000024371  | C2         | -1.879742587 | 1.58E-25    |
| ENSMUSG00000002375   | Mal        | -1.874821646 | 0.043828705 |
| ENSMUSG000000029362  | Tag1       | -1.867661309 | 8.07E-13    |
| ENSMUSG00000004779   | Aktb1a8    | -1.85904752  | 4.72E-12    |
| ENSMUSG000000043771  | Eiv2a      | -1.838435275 | 0.00296642  |
| ENSMUSG000000008299  | It7        | -1.831385476 | 0.002602967 |
| ENSMUSG000000064899  | Snord118   | -1.821212588 | 0.001632331 |
| ENSMUSG000000050758  | Skap1      | -1.813141859 | 0.026318125 |
| ENSMUSG000000002324  | Rec8       | -1.811173969 | 5.91E-06    |
| ENSMUSG0000000049608 | Gpr55      | -1.791118376 | 0.006189469 |
| ENSMUSG0000000307145 | Lypd1b     | -1.790520591 | 2.31E-83    |
| ENSMUSG0000000021509 | Slc25a48   | -1.774020767 | 1.29E-19    |
| ENSMUSG000000026538  | Pgs1       | -1.769312502 | 0.036349476 |
| ENSMUSG0000000030051 | Sp140      | -1.728138837 | 2.20E-06    |
| ENSMUSG0000000003949 | Whp        | -1.716926268 | 4.33E-11    |
| ENSMUSG000000028689  | Cdc163     | -1.709170602 | 0.042917017 |
| ENSMUSG000000016206  | H2-M3      | -1.705970883 | 0.029616272 |
| ENSMUSG000000041022  | Plazg2d    | -1.701976759 | 0.020590466 |
| ENSMUSG000000021108  | Prkch      | -1.700642415 | 0.021160302 |
| ENSMUSG000000070304  | Sp110      | -1.683935815 | 5.45E-05    |
| ENSMUSG000000066974  | Irgm2      | -1.683425129 | 2.24E-12    |
| ENSMUSG000000109593  | 7350057C01 | -1.656944797 | 0.044566267 |
| ENSMUSG0000000031165 | Wae        | -1.638981874 | 0.037045175 |
| ENSMUSG000000040747  | Cd53       | -1.636733144 | 0.015656244 |
| ENSMUSG000000026250  | Sifn2      | -1.633352995 | 3.53E-19    |
| ENSMUSG000000068420  | Duo2c      | -1.629601616 | 2.00E-119   |
| ENSMUSG000000039661  | Erf4a3     | -1.612954698 | 7.26E-07    |
| ENSMUSG000000039458  | Alkna      | -1.602819847 | 0.009861212 |
| ENSMUSG000000010064  | Slc38a3    | -1.592019033 | 7.32E-05    |
| ENSMUSG000000052229  | Gpr17      | -1.588246586 | 0.008482857 |
| ENSMUSG000000074489  | Bglap3b    | -1.575343642 | 0.00665393  |
| ENSMUSG0000000031197 | 7350057C01 | -1.574361395 | 1.08E-15    |
| ENSMUSG000000007657  | Tgrc4      | -1.567164747 | 0.00058235  |
| ENSMUSG000000007547  | Igae       | -1.566113015 | 0.013828877 |
| ENSMUSG000000050914  | Akrd37     | -1.565211856 | 1.49E-05    |
| ENSMUSG000000050762  | Prss27     | -1.560737199 | 0.009133556 |
| ENSMUSG000000029603  | Dxt1       | -1.55925497  | 0.036163918 |
| ENSMUSG000000021043  | Perpnb9    | -1.556171713 | 8.81E-11    |
| ENSMUSG000000046841  | Kkap4      | -1.552650048 | 9.29E-37    |
| ENSMUSG000000050178  | Ido1       | -1.549087752 | 7.30E-06    |
| ENSMUSG000000037439  | Tgrc1      | -1.541886802 | 0.000104307 |
| ENSMUSG000000062023  | Barx2      | -1.537300474 | 2.42E-16    |
| ENSMUSG000000008890  | Gmt2767    | -1.532891076 | 0.00237261  |
| ENSMUSG000000001812  | Bin2       | -1.530471318 | 0.0454463   |
| ENSMUSG000000030588  | Nod1       | -1.527021497 | 0.013835911 |
| ENSMUSG000000068052  | Cdc209b    | -1.526936147 | 8.15E-06    |
| ENSMUSG000000023597  | Ikar2      | -1.522886104 | 0.026991512 |
| ENSMUSG000000053566  | Nkfbiz     | -1.521862269 | 9.01E-14    |
| ENSMUSG000000047517  | Dmbt1      | -1.511246968 | 1.62E-10    |
| ENSMUSG000000026404  | Ddx59      | -1.501065823 | 0.024474389 |
| ENSMUSG000000052131  | Akr1b7     | -1.492398929 | 6.77E-23    |
| ENSMUSG000000068731  | Tp75b1     | -1.489353986 | 1.03E-07    |
| ENSMUSG000000008573  | Ttc39aas1  | -1.480645283 | 0.006819693 |
| ENSMUSG000000030770  | Coro1a     | -1.469633466 | 5.38E-05    |
| ENSMUSG000000003531  | Tamalin    | -1.461885895 | 0.02069169  |
| ENSMUSG000000000682  | Cd52       | -1.461679743 | 5.51E-05    |
| ENSMUSG000000077475  | Cd28       | -1.459582289 | 8.97E-12    |
| ENSMUSG000000029119  | Chr3       | -1.458836485 | 0.009715968 |
| ENSMUSG000000120485  | Gms35340   | -1.45842321  | 2.97E-06    |
| ENSMUSG000000023019  | Nlin1      | -1.451540943 | 1.68E-07    |
| ENSMUSG000000026252  | Opn3       | -1.451511239 | 9.93E-05    |
| ENSMUSG000000062622  | Gimp8b     | -1.449311633 | 0.009218264 |
| ENSMUSG000000057948  | Act13d     | -1.4459442   | 0.016400404 |
| ENSMUSG000000078485  | Plekhn1    | -1.445442688 | 0.00198114  |
| ENSMUSG000000009695  | 3300055D01 | -1.428039631 | 4.47E-10    |
| ENSMUSG00000004662   | Defa32     | -1.419911981 | 0.023237477 |
| ENSMUSG0000000092517 | Art2a      | -1.417074516 | 0.00299797  |
| ENSMUSG000000068855  | H2a20      | -1.41583486  | 0.038931136 |
| ENSMUSG000000053054  | Adh8a      | -1.412058481 | 4.87E-60    |
| ENSMUSG000000020384  | Cdr3b      | -1.407018470 | 5.78E-18    |
| ENSMUSG000000040751  | Lat2       | -1.40696369  | 9.51E-05    |
| ENSMUSG000000030220  | Agrgd1b    | -1.39399413  | 0.00644594  |
| ENSMUSG00000004163   | Selp1g     | -1.386330404 | 0.02043826  |
| ENSMUSG000000030165  | Kird1      | -1.381312675 | 0.01605813  |
| ENSMUSG000000039416  | Ifi4d      | -1.37090342  | 0.032942047 |
| ENSMUSG0000000085995 | Gmt2788    | -1.35713603  | 4.30E-08    |
| ENSMUSG000000042808  | Gpx2       | -1.353895403 | 2.68E-67    |
| ENSMUSG000000030134  | Il2rg      | -1.348127048 | 0.014137151 |
| ENSMUSG000000026509  | Capn2      | -1.345407304 | 0.026162144 |
| ENSMUSG000000040348  | Gtm3       | -1.334810421 | 1.44E-59    |
| ENSMUSG000000042677  | Zc3h12a    | -1.332671276 | 3.44E-17    |
| ENSMUSG000000032663  | Irgh2      | -1.329714585 | 0.030545798 |
| ENSMUSG000000079436  | Kcnj13     | -1.295481589 | 6.61E-20    |
| ENSMUSG000000057330  | Mpp3       | -1.291674432 | 0.01803626  |
| ENSMUSG000000014846  | Tppp3      | -1.288322659 | 2.94E-06    |
| ENSMUSG000000021187  | Tc2n       | -1.279375694 | 0.001350529 |
| ENSMUSG000000038530  | Rgs4       | -1.27831209  | 0.02836377  |
| ENSMUSG000000021749  | Fam3d3     | -1.27732963  | 1.28E-33    |
| ENSMUSG000000028480  | Gllp2      | -1.275239994 | 5.72E-21    |
| ENSMUSG000000029923  | Rab19      | -1.261939194 | 0.00072332  |
| ENSMUSG000000040010  | Slc7a5     | -1.261192521 | 0.029843409 |
| ENSMUSG000000039643  | Rab2b      | -1.256328691 | 0.003773892 |
| ENSMUSG000000038301  | Snc10      | -1.24010665  | 5.47E-09    |
| ENSMUSG000000079445  | B3gnt7     | -1.229398444 | 0.000414182 |
| ENSMUSG000000004665  | Cnn2       | -1.224680547 | 0.000215042 |
| ENSMUSG000000028019  | Pd1gc      | -1.210405973 | 0.012881120 |
| ENSMUSG000000022376  | Slc10a2    | -1.209260522 | 2.45E-39    |
| ENSMUSG000000038461  | S3ga1      | -1.206585475 | 6.71E-05    |
| ENSMUSG000000013851  | Nfr1b3     | -1.202543794 | 0.00518228  |
| ENSMUSG000000020875  | Hmbp       | -1.200318207 | 0.001637345 |
| ENSMUSG00000002834   | Exo8b      | -1.195577958 | 0.002773712 |
| ENSMUSG000000058952  | C1         | -1.194228912 | 1.85E-05    |
| ENSMUSG000000042115  | Khd2a8     | -1.194132255 | 0.012714205 |
| ENSMUSG000000016028  | Celr1      | -1.189677569 | 0.007264573 |
| ENSMUSG00000007945   | Marcksl1   | -1.183943765 | 1.34E-25    |
| ENSMUSG000000090101  | Snhg9      | -1.183642111 | 1.08E-05    |
| ENSMUSG000000029752  | Aars       | -1.181334958 | 2.40E-13    |
| ENSMUSG000000009378  | Slc16a12   | -1.180980676 | 0.046206365 |
| ENSMUSG000000030343  | Cdkn2a     | -1.179878114 | 0.015115355 |
| ENSMUSG000000020805  | Abc3       | -1.176694481 | 0.00559296  |
| ENSMUSG0000000202    | Aoz2       | -1.175894867 | 0.001512495 |
| ENSMUSG000000064109  | Hcat       | -1.166430178 | 7.00E-10    |
| ENSMUSG000000009585  | Apobc3     | -1.166338911 | 0.000667899 |
| ENSMUSG000000072618  | Gm10384    | -1.166179924 | 0.00401388  |
| ENSMUSG00000005582   | Palpnc1    | -1.154663612 | 0.026874589 |
| ENSMUSG000000091625  | Lam5       | -1.153487236 | 0.006975797 |

|                       |            |             |             |
|-----------------------|------------|-------------|-------------|
| ENSMUSG000000037211   | Spry1      | 1.758344012 | 0.015209092 |
| ENSMUSG000000004189   | Odad1      | 1.752479374 | 1.86E-20    |
| ENSMUSG0000000020377  | Ltdos      | 1.752399276 | 9.63E-11    |
| ENSMUSG0000000026070  | Il1r1      | 1.749779909 | 0.044795055 |
| ENSMUSG0000000022180  | Slc7a8     | 1.744272546 | 1.64E-08    |
| ENSMUSG0000000029814  | Igf2bp3    | 1.731976164 | 5.40E-19    |
| ENSMUSG0000000026950  | Nem1       | 1.720708946 | 0.004017009 |
| ENSMUSG0000000039114  | Nm1        | 1.71951414  | 0.043204363 |
| ENSMUSG000000052914   | Cyp2j6     | 1.711414303 | 6.68E-49    |
| ENSMUSG000000003283   | Hck        | 1.708015038 | 0.000113552 |
| ENSMUSG0000000023828  | Slc22a3    | 1.701681559 | 2.67E-09    |
| ENSMUSG0000000059631  | 150035N22  | 1.698827727 | 8.72E-08    |
| ENSMUSG0000000073094  | Smim6      | 1.691268896 | 0.000369548 |
| ENSMUSG0000000039110  | Myctcap    | 1.689708451 | 0.000395588 |
| ENSMUSG0000000028356  | Ampb       | 1.689144983 | 9.96E-11    |
| ENSMUSG0000000020467  | Eltmp1     | 1.68673012  | 0.023672623 |
| ENSMUSG0000000026621  | Mtar1      | 1.686366959 | 2.87E-06    |
| ENSMUSG0000000093805  | Gal3sta2   | 1.659144103 | 9.33E-07    |
| ENSMUSG000000027698   | Noch1      | 1.647598905 | 4.72E-10    |
| ENSMUSG0000000034526  | Sorbs2     | 1.647163441 | 0.000881152 |
| ENSMUSG0000000029311  | Hed17b11   | 1.644138563 | 2.89E-41    |
| ENSMUSG000000015243   | Abca1      | 1.644279442 | 8.63E-48    |
| ENSMUSG000000049555   | Time1      | 1.639758253 | 1.20E-10    |
| ENSMUSG000000062414   | Hed3b3     | 1.638665173 | 2.51E-09    |
| ENSMUSG0000000030155  | Clec2e     | 1.637159413 | 1.06E-30    |
| ENSMUSG0000000025810  | Nrp1       | 1.6291052   | 0.002285563 |
| ENSMUSG000000024266   | Adad2      | 1.621542361 | 2.46E-05    |
| ENSMUSG0000000032418  | Me1        | 1.617579929 | 3.60E-20    |
| ENSMUSG0000000025243  | Slc2a20b   | 1.609659585 | 8.21E-05    |
| ENSMUSG000000112129   | Pld1       | 1.590647926 | 1.38E-37    |
| ENSMUSG000000024620   | Pdgrfr     | 1.587754121 | 0.002497937 |
| ENSMUSG0000000034528  | Hed17b13   | 1.584096827 | 5.76E-28    |
| ENSMUSG0000000087006  | Gm13889    | 1.580672373 | 0.028146602 |
| ENSMUSG000000004462   | Cyp4b1     | 1.577789588 | 4.44E-24    |
| ENSMUSG000000018752   | Tnfmr1f3   | 1.568047466 | 0.009471519 |
| ENSMUSG000000047250   | Pgs1       | 1.5666063   | 0.003457643 |
| ENSMUSG0000000040998  | Npm1       | 1.545082873 | 3.94E-05    |
| ENSMUSG0000000039410  | Pndr16     | 1.542526007 | 2.84E-19    |
| ENSMUSG0000000097743  | Gm16973    | 1.543202296 | 0.043818752 |
| ENSMUSG0000000078780  | Gmt5150    | 1.533627406 | 0.004324645 |
| ENSMUSG0000000035112  | Wnk4       | 1.515613138 | 0.000194783 |
| ENSMUSG000000104529   | Rbakdn     | 1.51458443  | 0.0001491   |
| ENSMUSG000000022037   | Clu1       | 1.51012244  | 0.00321906  |
| ENSMUSG00000003714    | Mgl1       | 1.508467311 | 6.73E-09    |
| ENSMUSG0000000022912  | Prosl1     | 1.507434931 | 0.003138142 |
| ENSMUSG000000030285   | Tagln      | 1.507437239 | 0.02847561  |
| ENSMUSG000000032122   | Slc37a2    | 1.505466244 | 0.030269137 |
| ENSMUSG0000000022687  | Boc        | 1.503626942 | 0.040791125 |
| ENSMUSG0000000022445  | Cyp2d26    | 1.495724223 | 1.04E-24    |
| ENSMUSG0000000006711  | D130043K22 | 1.481979054 | 2.35E-05    |
| ENSMUSG0000000046568  | Zfp316     | 1.474313459 | 0.032543912 |
| ENSMUSG000000055827   | Gedmc3     | 1.47412598  | 5.06E-13    |
| ENSMUSG000000016382   | Pls3       | 1.463004101 | 0.014497077 |
| ENSMUSG0000000027359  | Slc27a2    | 1.461979133 | 1.01E-46    |
| ENSMUSG0000000064202  | Sptaaf1    | 1.459774599 | 1.73E-18    |
| ENSMUSG000000026726   | Cubn       | 1.452676781 | 1.07E-31    |
| ENSMUSG0000000026878  | Rgs5       | 1.451679781 | 0.011034641 |
| ENSMUSG000000001878   | Shpk1      | 1.444623639 | 7.83E-11    |
| ENSMUSG0000000037440  | Vnn1       | 1.442488589 | 4.37E-37    |
| ENSMUSG0000000006369  | Fbln1      | 1.438583759 | 2.37E-17    |
| ENSMUSG0000000005514  | Por        | 1.436377889 | 3.99E-13    |
| ENSMUSG0000000018848  | Dusp11021  | 1.433442683 | 0.000184746 |
| ENSMUSG000000109841   | E330011021 | 1.432170325 | 0.00365429  |
| ENSMUSG000000053279   | Alch1a1    | 1.4293652   | 3.19E-45    |
| ENSMUSG0000000040305  | Gstm7      | 1.428816057 | 7.67E-36    |
| ENSMUSG000000045980   | Tmem104    | 1.425020021 | 0.030993454 |
| ENSMUSG000000050721   | Plekh20    | 1.423110101 | 0.00836958  |
| ENSMUSG000000067231   | Cyp2c65    | 1.417759778 | 1.76E-51    |
| ENSMUSG000000022383   | Ppara      | 1.410390126 | 1.23E-34    |
| ENSMUSG000000046908   | Ltb4r1     | 1.406959802 | 0.014592683 |
| ENSMUSG000000032715   | Trfb3      | 1.402119227 | 1.52E-08    |
| ENSMUSG000000038648   | Creb32     | 1.382522813 | 2.44E-05    |
| ENSMUSG000000003586   | Rumx13     | 1.377201915 | 0.007757019 |
| ENSMUSG000000019762   | Gal3sta2   | 1.373102947 | 6.55E-20    |
| ENSMUSG0000000094451  | Synm7      | 1.369040451 | 5.70E-35    |
| ENSMUSG000000030554   | Synm7      | 1.36828383  | 0.001589163 |
| ENSMUSG0000000028427  | Argp1      | 1.364201482 | 2.25E-06    |
| ENSMUSG0000000064210  | A603062246 | 1.362026246 | 7.45E-15    |
| ENSMUSG000000116673   | ANOS309N07 | 1.348887826 | 0.012945209 |
| ENSMUSG0000000033910  | Gucy1a1    | 1.347151554 | 0.019429214 |
| ENSMUSG00000000105906 | Gu1a1      | 1.337737668 | 8.71E-14    |
| ENSMUSG0000000022040  | Eph2e      | 1.33539391  | 3.62E-03    |
| ENSMUSG0000000019775  | Rgs17      | 1.335139057 | 0.000657803 |
| ENSMUSG0000000037438  | Pagr7      | 1.334864942 | 1.27E-18    |
| ENSMUSG0000000026478  | Lamc1      | 1.329658427 | 0.003490740 |
| ENSMUSG0000000023094  | Mert2      | 1.325174403 | 6.61E-06    |
| ENSMUSG0000000037379  | Spn2c      | 1.319998183 | 0.019953841 |
| ENSMUSG0000000040147  | Maob       | 1.319676338 | 0.000147781 |
| ENSMUSG0000000079057  | Cyp4v3     | 1.319626229 | 2.72E-11    |
| ENSMUSG000000014351   | Gip        | 1.312089396 | 3.09E-06    |
| ENSMUSG0000000057440  | Mpp7       | 1.301808307 | 1.67E-06    |
| ENSMUSG0000000209134  | Pib1       | 1.302227355 | 1.24E-244   |
| ENSMUSG0000000035448  | Ctrc       | 1.29678139  | 0.003140787 |
| ENSMUSG0000000029212  | Slc22a13b  | 1.295879029 | 9.65E-151   |
| ENSMUSG000000056696   | Eltmod3    | 1.2929131   | 3.20E-05    |
| ENSMUSG000000015312   | Gad45b     | 1.289770272 | 0.00364716  |
| ENSMUSG0000000030087  | Klf15      | 1.286502556 | 0.010436414 |
| ENSMUSG000000029567   | Tmem89     | 1.276460098 | 0.001040678 |
| ENSMUSG0000000039952  | Tcd161e    | 1.274709181 | 0.024921788 |
| ENSMUSG000000052584   | Serp2      | 1.27450208  | 0.049068391 |
| ENSMUSG000000058317   | Ube2e2     | 1.273895238 | 0.023600331 |
| ENSMUSG0000000037662  | Afg8       | 1.271917628 | 1.56E-122   |
| ENSMUSG0000000031444  | P10        | 1.27191322  | 1.98E-09    |
| ENSMUSG0000000020333  | Acsl6      | 1.271913113 | 6.73E-06    |
| ENSMUSG0000000108449  | Gm4507     | 1.271912488 | 1.69E-13    |
| ENSMUSG0000000026631  | Sh2b6      | 1.271912019 | 0.026207129 |
| ENSMUSG0000000056282  | Plnr2      | 1.27191109  | 0.024476358 |
| ENSMUSG000000040111   | Grmd1b     | 1.269373761 | 2.02E-122   |
| ENSMUSG0000000028199  | Cyp7       | 1.269560318 | 2.29E-05    |
| ENSMUSG0000000036186  | Dipk1b     | 1.268920175 | 0.00103815  |
| ENSMUSG0000000077390  | Bche       | 1.258957071 | 7.79E-06    |
| ENSMUSG0000000020604  | Arg3       | 1.25104979  | 1.94E-71    |
| ENSMUSG000000022853   | Ehnhadn    | 1.247882932 | 0.023344525 |
| ENSMUSG000000025004   | Cyp2c40    | 1.246596012 | 0.0426896   |
| ENSMUSG0000000086728  | Mam21os    | 1.244732271 | 0.038066421 |
| ENSMUSG0000000024507  | Hed17b4    | 1.243485976 | 2.08E-23    |
| ENSMUSG0000000035780  | Utg23a     | 1.243424808 | 1.67E-32    |
| ENSMUSG000000015134   | Alad1a3    | 1.242310631 | 2.74E-122   |
| ENSMUSG0000000068762  | Gstm16     | 1.240997355 | 2.20E-123   |
| ENSMUSG000000022263   | Grip1      | 1.237600905 | 9.23E-19    |
| ENSMUSG0000000091721  | Tmdo       | 1.232654046 | 2.32E-09    |

|                      |            |              |             |
|----------------------|------------|--------------|-------------|
| ENSMUSG000000031584  | Ger        | -1.149405782 | 4.50E-96    |
| ENSMUSG000000033906  | Zdhrc1c5   | -1.146552755 | 0.01562695  |
| ENSMUSG000000042544  | Id1        | -1.14556446  | 1.86E-18    |
| ENSMUSG000000030107  | Usp18      | -1.141143083 | 1.66E-21    |
| ENSMUSG000000007342  | IB3007J02F | -1.132581003 | 0.00376232  |
| ENSMUSG000000050747  | Trim15     | -1.131206657 | 1.25E-06    |
| ENSMUSG000000006508  | Gm24616    | -1.129166832 | 0.00536533  |
| ENSMUSG000000029798  | Her0b      | -1.124166901 | 2.02E-09    |
| ENSMUSG000000021130  | Prrs30     | -1.124123171 | 1.98E-29    |
| ENSMUSG000000050710  | AW112010   | -1.123287889 | 3.88E-07    |
| ENSMUSG000000044681  | Cnpy1      | -1.121256436 | 3.51E-05    |
| ENSMUSG000000022900  | Idlr1      | -1.118370306 | 0.00199876  |
| ENSMUSG000000002658  | Prrx1      | -1.118188891 | 7.13E-56    |
| ENSMUSG000000012187  | Mogst1     | -1.116035702 | 0.028413825 |
| ENSMUSG000000029847  | Slc23a4    | -1.11536136  | 1.72E-07    |
| ENSMUSG000000022748  | Cmsst1     | -1.114389099 | 0.02142583  |
| ENSMUSG000000010203  | Prrp1      | -1.112332126 | 0.014144122 |
| ENSMUSG000000030034  | Plut1      | -1.111857379 | 5.34E-07    |
| ENSMUSG000000009250  | Flmn       | -1.11012588  | 1.32E-40    |
| ENSMUSG000000023345  | Poc1a      | -1.10886499  | 0.00900661  |
| ENSMUSG00000001190   | Lgm1       | -1.10589767  | 1.94E-30    |
| ENSMUSG000000008590  | Gm12408    | -1.10558685  | 0.00672702  |
| ENSMUSG000000027454  | Gins1      | -1.100274526 | 0.01593035  |
| ENSMUSG000000021619  | Atg10      | -1.099062514 | 5.79E-05    |
| ENSMUSG000000030240  | N15e       | -1.098566333 | 2.12E-15    |
| ENSMUSG00000105547   | Ilg1c3     | -1.096802227 | 0.031216573 |
| ENSMUSG00000004702   | Zdhrc2     | -1.088693692 | 6.57E-08    |
| ENSMUSG00000102106   | C210043Q21 | -1.087421517 | 0.011305183 |
| ENSMUSG00000003823   | Casp3      | -1.086943041 | 4.58E-104   |
| ENSMUSG000000057346  | C109f1     | -1.084041431 | 3.95E-21    |
| ENSMUSG000000007144  | Acp1a      | -1.083732687 | 0.016450556 |
| ENSMUSG000000079523  | Tmsb10     | -1.080971077 | 2.96E-05    |
| ENSMUSG000000025161  | Slc16a3    | -1.069613582 | 9.15E-28    |
| ENSMUSG000000074039  | Defa5      | -1.066791679 | 2.55E-09    |
| ENSMUSG000000040434  | B3gnt6     | -1.061403845 | 0.00569336  |
| ENSMUSG000000071337  | Cebpδ      | -1.061174491 | 1.70E-21    |
| ENSMUSG000000033707  | Lrc24      | -1.057675233 | 0.01803907  |
| ENSMUSG000000058163  | Gm14331    | -1.05592136  | 0.000455939 |
| ENSMUSG000000037638  | Smt33      | -1.050607799 | 0.01412539  |
| ENSMUSG000000022847  | Thpo       | -1.047931298 | 0.002805469 |
| ENSMUSG000000033358  | Casp4      | -1.044987183 | 0.000130017 |
| ENSMUSG000000037434  | Slc30a1    | -1.044638417 | 3.15E-20    |
| ENSMUSG000000063206  | Defa34     | -1.044456517 | 2.76E-20    |
| ENSMUSG000000052492  | Ifitm3     | -1.043052849 | 7.20E-05    |
| ENSMUSG000000025871  | Slttr6     | -1.041265087 | 4.59E-15    |
| ENSMUSG00000102047   | 201010A06  | -1.040604835 | 0.00251934  |
| ENSMUSG000000004253  | Gbp3       | -1.039795467 | 0.00020386  |
| ENSMUSG000000049047  | Armc3      | -1.039135104 | 0.021984813 |
| ENSMUSG000000030235  | Ets1       | -1.038230496 | 0.0023007   |
| ENSMUSG000000050335  | Lgals3     | -1.037950504 | 2.71E-14    |
| ENSMUSG000000050237  | Dna2       | -1.037909353 | 2.61E-38    |
| ENSMUSG000000020716  | Zfp385b    | -1.035990589 | 6.44E-06    |
| ENSMUSG000000049858  | Suox       | -1.035291208 | 4.09E-51    |
| ENSMUSG000000048823  | Mmp7       | -1.027185997 | 3.64E-10    |
| ENSMUSG000000018627  | T1p1       | -1.022674726 | 0.027753045 |
| ENSMUSG000000048779  | P2ry6      | -1.020861659 | 0.000677533 |
| ENSMUSG000000053862  | Slc51b     | -1.020081921 | 1.15E-12    |
| ENSMUSG000000029844  | Pdx1       | -1.019158235 | 7.46E-26    |
| ENSMUSG000000093371  | Aco7       | -1.018919753 | 6.74E-09    |
| ENSMUSG000000075254  | Heg1       | -1.018894728 | 0.021349288 |
| ENSMUSG000000036222  | Ly6m       | -1.018854434 | 3.14E-20    |
| ENSMUSG000000030391  | Caprin2    | -1.015687798 | 0.001512029 |
| ENSMUSG0000000060121 | Gemin2     | -1.015651754 | 0.005317399 |
| ENSMUSG000000029009  | Mhfr       | -1.013632474 | 0.03519392  |
| ENSMUSG000000022207  | Mqt1       | -1.007452299 | 0.00298662  |
| ENSMUSG000000026417  | Pigr       | -1.006830326 | 2.07E-14    |
| ENSMUSG000000020819  | Timgd1     | -1.006530757 | 3.38E-68    |
| ENSMUSG000000028899  | Tspan1     | -1.004870663 | 9.13E-47    |
| ENSMUSG000000030407  | Opc1       | -1.001928401 | 0.022839999 |
| ENSMUSG000000061845  | Defa35     | -0.999988554 | 2.54E-15    |
| ENSMUSG000000024121  | Lama3      | -0.999974907 | 1.49E-13    |
| ENSMUSG000000042306  | 100a1a4    | -0.998382287 | 2.73E-07    |
| ENSMUSG000000051735  | R1n1       | -0.992914175 | 0.027753045 |
| ENSMUSG00000105879   | Gm6204     | -0.991596029 | 0.000809269 |
| ENSMUSG000000097197  | Hgb6       | -0.991595877 | 3.61E-06    |
| ENSMUSG000000080727  | C920021L13 | -0.986579198 | 0.023818348 |
| ENSMUSG000000030719  | Endo1      | -0.984110317 | 1.20E-21    |
| ENSMUSG000000030483  | B3gnt3     | -0.98348725  | 8.31E-13    |
| ENSMUSG000000026083  | N1b1       | -0.981884552 | 0.012218937 |
| ENSMUSG000000024640  | Pst1       | -0.979451982 | 0.000837522 |
| ENSMUSG000000000440  | Pparg      | -0.975515524 | 3.31E-14    |
| ENSMUSG000000028885  | Smpd3b     | -0.973320949 | 1.81E-13    |
| ENSMUSG000000022323  | Rad51      | -0.972105585 | 0.031561666 |
| ENSMUSG000000049346  | Ulk1b      | -0.96806071  | 3.28E-12    |
| ENSMUSG000000028119  | Ddah1      | -0.966323917 | 3.41E-78    |
| ENSMUSG000000028025  | Alpk1      | -0.966156608 | 1.94E-10    |
| ENSMUSG000000038608  | Noxa1      | -0.965089407 | 4.43E-07    |
| ENSMUSG000000060149  | BCO2059    | -0.964820754 | 0.001291087 |
| ENSMUSG000000088254  | Gm24289    | -0.963508036 | 0.000105645 |
| ENSMUSG000000026104  | Stkl       | -0.961088993 | 2.20E-09    |
| ENSMUSG000000012519  | M1         | -0.960830026 | 1.49E-07    |
| ENSMUSG00000007987   | H22        | -0.957063696 | 0.002178827 |
| ENSMUSG000000039999  | Batf2      | -0.955783094 | 2.17E-10    |
| ENSMUSG000000029086  | Prom1      | -0.953083801 | 1.95E-28    |
| ENSMUSG000000038305  | Spast2     | -0.951942451 | 0.003744916 |
| ENSMUSG00000003820   | Tgm2       | -0.948206063 | 1.76E-32    |
| ENSMUSG000000052949  | Rnf157     | -0.946211173 | 0.001859094 |
| ENSMUSG00000018899   | Irf1       | -0.945185724 | 1.41E-21    |
| ENSMUSG000000029530  | Ccr9       | -0.942144264 | 0.045596836 |
| ENSMUSG000000006035  | Car4       | -0.941816063 | 1.84E-16    |
| ENSMUSG000000028995  | Ptprc      | -0.938640374 | 1.06E-06    |
| ENSMUSG000000024742  | Fen1       | -0.937685746 | 0.008477322 |
| ENSMUSG000000059727  | Insl6      | -0.932435459 | 3.51E-17    |
| ENSMUSG000000038732  | Mboat1     | -0.931208479 | 4.81E-54    |
| ENSMUSG000000054816  | Lipg       | -0.931201365 | 8.56E-06    |
| ENSMUSG000000062064  | Slc27a     | -0.930334727 | 5.57E-06    |
| ENSMUSG000000027977  | Srgn       | -0.928744566 | 0.002054823 |
| ENSMUSG000000072974  | Gm1787     | -0.92455721  | 0.019982045 |
| ENSMUSG000000030193  | Dock11     | -0.922085297 | 0.000483816 |
| ENSMUSG000000031824  | 63458A08   | -0.919377536 | 1.49E-08    |
| ENSMUSG000000040430  | Pitpnc1    | -0.91913153  | 0.004455409 |
| ENSMUSG000000028044  | Kctb1      | -0.91508854  | 0.000152616 |
| ENSMUSG000000049439  | Cyp20a1    | -0.914944321 | 0.005286484 |
| ENSMUSG00000028857   | Prt1       | -0.907291396 | 3.86E-11    |
| ENSMUSG000000038372  | Gmds       | -0.907075068 | 2.29E-29    |
| ENSMUSG000000029007  | Agtrp      | -0.906781085 | 7.70E-05    |
| ENSMUSG000000037544  | Pp1r11b    | -0.901918745 | 1.76E-08    |
| ENSMUSG000000026880  | Stom       | -0.901657429 | 1.14E-08    |
| ENSMUSG000000030210  | Sip2       | -0.900734243 | 0.000645534 |
| ENSMUSG000000039005  | T14        | -0.898612682 | 0.018279387 |
| ENSMUSG000000024164  | Lip2       | -0.895168548 | 0.01628928  |
| ENSMUSG000000037242  | Clic4      | -0.889214509 | 7.07E-07    |

|                      |            |             |             |
|----------------------|------------|-------------|-------------|
| ENSMUSG0000000026278 | Bok        | 1.230449969 | 1.71E-05    |
| ENSMUSG0000000031877 | Ces2g      | 1.226510847 | 1.21E-141   |
| ENSMUSG0000000036880 | Acaa2      | 1.225615702 | 1.96E-69    |
| ENSMUSG0000000050320 | Fgf14      | 1.222241428 | 0.031864013 |
| ENSMUSG0000000066595 | Fivr1      | 1.219235877 | 2.57E-59    |
| ENSMUSG000000037344  | Slc12a9    | 1.217055082 | 0.004342658 |
| ENSMUSG0000000700506 | Mfha1      | 1.215940236 | 3.75E-31    |
| ENSMUSG000000047562  | Pmp10      | 1.215893031 | 3.35E-13    |
| ENSMUSG0000000203070 | Rgn        | 1.215004885 | 0.000147868 |
| ENSMUSG000000030972  | Acam5      | 1.213119343 | 5.08E-07    |
| ENSMUSG0000000025194 | Abcc2      | 1.203702463 | 2.77E-11    |
| ENSMUSG000000005360  | Slc13a     | 1.203562711 | 1.44E-17    |
| ENSMUSG0000000087477 | Gm13822    | 1.202209093 | 0.005636551 |
| ENSMUSG000000027983  | Cyp2u1     | 1.197354478 | 2.74E-12    |
| ENSMUSG0000000025915 | Sgk3       | 1.196749202 | 9.38E-05    |
| ENSMUSG000000031214  | Ophn1      | 1.18877808  | 0.009317429 |
| ENSMUSG0000000022289 | Angpt14    | 1.187845714 | 1.93E-07    |
| ENSMUSG0000000025197 | Cyp2c23    | 1.186803771 | 3.38E-10    |
| ENSMUSG000000026832  | Cy1p       | 1.182227636 | 4.42E-08    |
| ENSMUSG000000045658  | Pid1       | 1.179174379 | 0.01493476  |
| ENSMUSG000000036216  | Leap2      | 1.178769792 | 9.54E-30    |
| ENSMUSG000000022799  | Arhgap31   | 1.177766459 | 0.01733006  |
| ENSMUSG000000053835  | H2-124     | 1.173026439 | 1.57E-06    |
| ENSMUSG000000031790  | Mmp15      | 1.172489387 | 1.17E-06    |
| ENSMUSG000000028435  | Lipa       | 1.171843428 | 2.34E-40    |
| ENSMUSG000000027187  | Cat        | 1.167863802 | 8.21E-25    |
| ENSMUSG0000000032311 | Nrg4       | 1.167349271 | 4.92E-09    |
| ENSMUSG000000055053  | Nfic       | 1.159787279 | 1.90E-09    |
| ENSMUSG000000028435  | Aqp3       | 1.157514301 | 4.13E-07    |
| ENSMUSG000000026343  | Qpr39      | 1.155326456 | 9.40E-05    |
| ENSMUSG000000035311  | Gnat1b     | 1.151335005 | 9.31E-08    |
| ENSMUSG000000042684  | Npl        | 1.150170925 | 0.001788343 |
| ENSMUSG000000022122  | Ednr1      | 1.149088017 | 0.02883063  |
| ENSMUSG0000000304701 | Neurod1    | 1.149035596 | 0.00237907  |
| ENSMUSG00000111296   | 2010001547 | 1.148063947 | 2.81E-77    |
| ENSMUSG00000112805   | Gkaf5474   | 1.143621994 | 0.001276806 |
| ENSMUSG000000064105  | Cnm2c      | 1.14268507  | 4.72E-07    |
| ENSMUSG000000061898  | Pibak      | 1.142489661 | 0.023715214 |
| ENSMUSG000000046245  | Pilra      | 1.141802701 | 0.040342867 |
| ENSMUSG000000026659  | Dusp12     | 1.138445015 | 2.92E-09    |
| ENSMUSG000000029231  | Pdgfra     | 1.137568773 | 5.24E-05    |
| ENSMUSG000000047394  | Odf3b      | 1.134913063 | 9.79E-08    |
| ENSMUSG000000044676  | Zfp612     | 1.132612348 | 0.004132894 |
| ENSMUSG000000038068  | Rnf144b    | 1.131919232 | 0.02596319  |
| ENSMUSG000000049791  | Fzd4       | 1.130178039 | 3.35E-06    |
| ENSMUSG000000032841  | Ptf1       | 1.129785282 | 0.031901129 |
| ENSMUSG000000022389  | Lifr       | 1.127179205 | 0.041982779 |
| ENSMUSG000000025780  | Itih5      | 1.121230326 | 3.77E-06    |
| ENSMUSG000000055114  | Anxa13     | 1.121142388 | 1.74E-16    |
| ENSMUSG000000038473  | Nos1ap     | 1.11950326  | 5.82E-08    |
| ENSMUSG000000022708  | Zbtb20     | 1.118526396 | 1.00E-148   |
| ENSMUSG000000030769  | Slc5a11    | 1.114118051 | 1.88E-08    |
| ENSMUSG000000048440  | Cyp4f16    | 1.109289372 | 1.45E-11    |
| ENSMUSG000000018378  | 2210416015 | 1.107021258 | 0.024422864 |
| ENSMUSG000000054263  | Lifr       | 1.099037019 | 3.22E-05    |
| ENSMUSG000000053414  | Hunk       | 1.094442447 | 0.01291808  |
| ENSMUSG000000030340  | Scnn1a     | 1.087444931 | 0.03614544  |
| ENSMUSG000000030605  | Migs8      | 1.087308406 | 0.002308611 |
| ENSMUSG000000060402  | Chst8      | 1.08441176  | 1.37E-09    |
| ENSMUSG000000050288  | Fzd2       | 1.08209951  | 0.020694027 |
| ENSMUSG000000078139  | AK157302   | 1.07828863  | 0.030553863 |
| ENSMUSG000000074071  | Fam168b    | 1.076992265 | 0.01052681  |
| ENSMUSG0000000303555 | Cyp17a1    | 1.075614213 | 0.00810467  |
| ENSMUSG00000104011   | Gm32391    | 1.073912221 | 0.036163918 |
| ENSMUSG000000048486  | Fitm2      | 1.070790242 | 0.021047305 |
| ENSMUSG000000028383  | Hsd2       | 1.069652624 | 1.10E-06    |
| ENSMUSG000000024747  | Adh1a7     | 1.067677888 | 1.56E-11    |
| ENSMUSG000000027870  | Hao2       | 1.065606991 | 0.000276827 |
| ENSMUSG000000062363  | Nd4        | 1.060420012 | 4.41E-08    |
| ENSMUSG000000045414  | Dpk2a      | 1.057666854 | 5.05E-08    |
| ENSMUSG000000037905  | Bri3bp     | 1.056313699 | 1.08E-16    |
| ENSMUSG000000058997  | Vwa8       | 1.055504487 | 3.55E-08    |
| ENSMUSG000000029334  | Prkg2      | 1.055167228 | 1.11E-18    |
| ENSMUSG000000030691  | Fchs2d     | 1.051098664 | 5.53E-12    |
| ENSMUSG000000030878  | Cdr2       | 1.049004313 | 6.78E-26    |
| ENSMUSG000000062044  | Lmtk3      | 1.047313199 | 0.03823312  |
| ENSMUSG000000029761  | Fkbp9      | 1.045933324 | 0.00542996  |
| ENSMUSG000000027962  | Vcam1      | 1.04503033  | 0.006571296 |
| ENSMUSG000000055748  | Gdmc4      | 1.04191765  | 1.02E-19    |
| ENSMUSG000000041660  | Bbox1      | 1.040207227 | 1.67E-41    |
| ENSMUSG000000048332  | Lhfp16     | 1.040185201 | 0.00027319  |
| ENSMUSG000000040102  | Khlh42     | 1.038739473 | 0.000422348 |
| ENSMUSG000000017929  | B4glt5s    | 1.034930362 | 6.45E-08    |
| ENSMUSG000000025813  | Homer2     | 1.034960667 | 4.08E-12    |
| ENSMUSG000000019359  | Gdpd2      | 1.025443343 | 4.61E-32    |
| ENSMUSG000000020600  | Slc17a5    | 1.025498031 | 8.49E-05    |
| ENSMUSG000000034751  | Mast4      | 1.024710853 | 1.92E-08    |
| ENSMUSG000000086712  | Max1       | 1.023532281 | 3.26E-47    |
| ENSMUSG000000028127  | Abcd3      | 1.022363727 | 2.85E-25    |
| ENSMUSG000000000876  | Pmp44      | 1.020971154 | 2.77E-09    |
| ENSMUSG000000048280  | Zfp738     | 1.020535922 | 0.02578933  |
| ENSMUSG000000013130  | Fzd2       | 1.020472991 | 2.40E-12    |
| ENSMUSG000000020538  | Sretf1     | 1.019173798 | 5.33E-05    |
| ENSMUSG000000010025  | Adh1a3a2   | 1.01872596  | 8.22E-21    |
| ENSMUSG000000022514  | It1ap      | 1.017949356 | 0.00216758  |
| ENSMUSG000000046096  | Hmnp39     | 1.013530978 | 0.03668467  |
| ENSMUSG000000037797  | Adh4       | 1.013197019 | 1.10E-85    |
| ENSMUSG000000038872  | Zfh3a3     | 1.013478982 | 0.00011518  |
| ENSMUSG000000025763  | Zfp212     | 1.011180811 | 0.00020713  |
| ENSMUSG000000013150  | Glocf2     | 1.009670183 | 0.000575867 |
| ENSMUSG000000028494  | Pin2       | 1.008258585 | 3.62E-13    |
| ENSMUSG000000030585  | Secl142    | 1.005247591 | 2.29E-15    |
| ENSMUSG000000023764  | Sf1        | 1.002612748 | 0.00064938  |
| ENSMUSG000000060626  | Dmr3       | 1.001734529 | 3.68E-05    |
| ENSMUSG000000035877  | Zfh3c      | 0.998244223 | 0.003729635 |
| ENSMUSG000000024818  | Slc5a45    | 0.998000208 | 7.72E-37    |
| ENSMUSG000000008855  | Hmcd5      | 0.996968386 | 0.00081349  |
| ENSMUSG000000028088  | Fmo5       | 0.996001034 | 4.58E-11    |
| ENSMUSG000000025402  | Nat3       | 0.994696001 | 0.028064487 |
| ENSMUSG000000036231  | Agbr2      | 0.988541877 | 0.004494332 |
| ENSMUSG000000036473  | Tldc124    | 0.987344152 | 8.95E-08    |
| ENSMUSG000000010122  | Slc17a1    | 0.98696146  | 3.99E-12    |
| ENSMUSG000000049557  | Zfp1m1     | 0.985641444 | 5.20E-08    |
| ENSMUSG000000048550  | Thsl1      | 0.986029867 | 0.01310755  |
| ENSMUSG000000030643  | Rab30      | 0.985576678 | 3.50E-11    |
| ENSMUSG000000050534  | Hmnp39     | 0.985462031 | 0.00012622  |
| ENSMUSG0000000001657 | Hogx4      | 0.983764206 | 8.06E-05    |
| ENSMUSG000000027876  | Rgl2       | 0.978285859 | 5.20E-24    |
| ENSMUSG000000020019  | Ntn4       | 0.978107397 | 0.00010414  |
| ENSMUSG000000041762  | Grip155    | 0.978102475 | 1.17E-13    |
| ENSMUSG0000000120645 | Gm9688     | 0.977379951 | 1.14E-08    |
| ENSMUSG000000048264  | Dip2c      | 0.977272474 | 0.00859004  |

|                       |            |               |             |                     |            |             |             |                     |              |              |                     |                     |             |             |             |
|-----------------------|------------|---------------|-------------|---------------------|------------|-------------|-------------|---------------------|--------------|--------------|---------------------|---------------------|-------------|-------------|-------------|
| ENSMUSG00000029095    | Abilm2     | -0.888412468  | 0.001126048 | ENSMUSG00000025698  | Tln2       | 0.977018408 | 1.53E-11    | ENSMUSG00000106397  | Gm21049      | -0.827702386 | 3.76E-19            | ENSMUSG00000034845  | Plvap       | 0.795963993 | 9.41E-05    |
| ENSMUSG00000041431    | Cnrb1      | -0.888241599  | 0.00033731  | ENSMUSG00000037995  | Igsfr9     | 0.97821406  | 7.98E-09    | ENSMUSG00000043705  | Capn13       | -0.82688149  | 6.02E-08            | ENSMUSG00000023341  | Mx2         | 0.795184538 | 0.002020061 |
| ENSMUSG00000040204    | Pclaf      | -0.886970591  | 0.000144948 | ENSMUSG00000042010  | Acab3      | 0.970446373 | 0.005923033 | ENSMUSG00000023530  | Rdh5         | -0.826480422 | 0.001820682         | ENSMUSG00000019841  | E300011021  | 0.795072411 | 0.00365429  |
| ENSMUSG000000116542   | Cd2002     | -0.885022982  | 0.01388499  | ENSMUSG00000025002  | Cyp2c55    | 0.96962976  | 1.46E-47    | ENSMUSG00000013150  | Glo2d        | -0.825399399 | 0.000575867         | ENSMUSG00000007038  | Nu          | 0.792842895 | 1.01E-34    |
| ENSMUSG00000027163    | Hoga1      | -0.885042653  | 0.019798989 | ENSMUSG00000028944  | Pkag2      | 0.968846094 | 1.41E-21    | ENSMUSG00000021748  | Cmsm1        | -0.825117811 | 0.02114563          | ENSMUSG000000074342 | H30077J02R  | 0.789289021 | 0.003762332 |
| ENSMUSG00000004515    | lRf8       | -0.883610033  | 3.09E-15    | ENSMUSG000000057286 | St6lgacna2 | 0.968811937 | 0.014086736 | ENSMUSG00000021213  | Akrlc13      | -0.8221652   | 7.96E-53            | ENSMUSG000000040957 | Cables1     | 0.789226219 | 8.32E-08    |
| ENSMUSG000000017697   | A4a        | -0.8813207496 | 1.40E-57    | ENSMUSG000000044952 | Kctd21     | 0.968316514 | 0.49075975  | ENSMUSG000000202681 | Ace1         | -0.815362757 | 0.002512482         | ENSMUSG000000043083 | Agar        | 0.788349265 | 2.87E-05    |
| ENSMUSG000000021993   | Mlmp       | -0.880976191  | 0.017466762 | ENSMUSG000000097852 | 4933405D12 | 0.964930621 | 0.014260624 | ENSMUSG000000028113 | Imp4a        | -0.813481836 | 0.039231689         | ENSMUSG000000070269 | Vars        | 0.787140604 | 9.12E-09    |
| ENSMUSG000000059363   | Fm         | -0.880214292  | 0.038521767 | ENSMUSG000000020220 | V3851272   | 0.958803872 | 1.47E-05    | ENSMUSG000000025176 | Alch4a1      | -0.812897685 | 9.02E-08            | ENSMUSG000000032666 | 170025G004  | 0.782636558 | 5.45E-12    |
| ENSMUSG00000020498    | Cd72       | -0.880069825  | 0.01501549  | ENSMUSG000000028708 | Mmk1       | 0.95862025  | 0.02692809  | ENSMUSG00000044468  | Tent5c       | -0.808684637 | 1.64E-05            | ENSMUSG00000021336  | Sic17a4     | 0.782315166 | 3.85E-18    |
| ENSMUSG00000002082    | Cnrf       | -0.87341569   | 0.00695745  | ENSMUSG000000028005 | Guoy1b1    | 0.958192718 | 0.049627004 | ENSMUSG00000051615  | Rap2a        | -0.807596618 | 3.12E-17            | ENSMUSG000000068246 | Apob9b      | 0.780154631 | 3.34E-07    |
| ENSMUSG000000013643   | Lypd8      | -0.8711037    | 2.88E-11    | ENSMUSG000000013878 | Rnf170     | 0.95811524  | 0.01649073  | ENSMUSG00000027332  | Ivd          | -0.80729531  | 0.010550001         | ENSMUSG00000045871  | Sitrnk6     | 0.775622167 | 4.59E-15    |
| ENSMUSG000000002856   | Mwd3       | -0.86723113   | 0.033029568 | ENSMUSG000000074170 | Plekfh1    | 0.957498521 | 7.76E-10    | Fabp2               | -0.802759343 | 0.000445521  | ENSMUSG00000025429  | Pstpp2p             | 0.775513157 | 3.56E-06    |             |
| ENSMUSG000000037946   | Fgd3       | -0.866620338  | 0.00136289  | ENSMUSG000000302080 | Apoa4      | 0.956922333 | 1.08E-93    | Lrclb1              | -0.80046455  | 0.031199374  | ENSMUSG00000045056  | Ambrta1             | 0.775093814 | 0.020694027 |             |
| ENSMUSG000000019853   | Help2      | -0.863113015  | 0.00160016  | ENSMUSG000000110573 | Gm5485     | 0.955712643 | 3.30E-31    | Hoga1               | -0.79915615  | 0.019696589  | ENSMUSG00000067297  | Htt1b2              | 0.774301055 | 3.38E-17    |             |
| ENSMUSG000000020055   | Spag5      | -0.861163843  | 0.000393845 | ENSMUSG000000024731 | Me4a10     | 0.953922716 | 5.87E-29    | Sic13a2             | -0.797820877 | 1.56E-44     | ENSMUSG000000030374 | Stm4                | 0.773934604 | 4.76E-05    |             |
| ENSMUSG000000036136   | Fam110c    | -0.856249211  | 0.000604495 | ENSMUSG000000020258 | Glyctc     | 0.953572465 | 0.000299517 | Spdof               | -0.797262843 | 7.71E-05     | ENSMUSG00000004754  | Smm26               | 0.773129117 | 6.57E-07    |             |
| ENSMUSG000000097779   | H833407H14 | -0.854261305  | 1.27E-07    | ENSMUSG000000030834 | Aboc       | 0.953031116 | 6.86E-08    | Tpm2                | -0.79673777  | 0.010603278  | ENSMUSG00000024242  | Mapk4k3             | 0.772945857 | 0.000568118 |             |
| ENSMUSG000000028526   | Htt172     | -0.854071318  | 3.52E-12    | ENSMUSG000000054442 | Cib        | 0.952633121 | 8.02E-06    | Snm30               | -0.796645512 | 0.00712989   | ENSMUSG00000087651  | 150009L16           | 0.772141758 | 2.38E-07    |             |
| ENSMUSG0000000509149  | Hfsd4      | -0.848649207  | 1.66E-08    | ENSMUSG000000030298 | Treh       | 0.952249849 | 6.66E-77    | Golg9               | -0.79513657  | 0.054992602  | ENSMUSG00000067825  | Pex2b               | 0.774020917 | 0.00461191  |             |
| ENSMUSG000000006028   | Hk2        | -0.846149428  | 3.51E-24    | ENSMUSG00000001663  | Gtt11      | 0.95123453  | 3.80E-149   | Sic30a10            | -0.792058601 | 1.80E-07     | ENSMUSG000000035578 | Argp                | 0.769647321 | 0.001420242 |             |
| ENSMUSG000000065956   | Defa37     | -0.845138675  | 0.005908885 | ENSMUSG000000038702 | Dsl        | 0.947371629 | 8.25E-14    | Gpdtch2             | -0.791519699 | 0.035653265  | ENSMUSG00000036256  | Ighf7               | 0.767906561 | 0.00240375  |             |
| ENSMUSG00000003578    | Iqcg       | -0.842497844  | 0.001420242 | ENSMUSG000000069805 | Fbp1       | 0.944093607 | 8.73E-136   | Cleca4              | -0.78475555  | 8.47E-14     | ENSMUSG000000008090 | Ingbr1              | 0.767293062 | 1.91E-08    |             |
| ENSMUSG000000071716   | Birc5      | -0.839080637  | 1.65E-06    | ENSMUSG000000032788 | Pdk        | 0.939915202 | 3.84E-07    | Iyd                 | -0.784192379 | 6.05E-35     | ENSMUSG00000031075  | Ano                 | 0.765818111 | 6.31E-05    |             |
| ENSMUSG000000028526   | Od2f1      | -0.834804238  | 5.85E-07    | ENSMUSG000000020681 | Eac        | 0.938712104 | 0.002512482 | Cbr31               | -0.782392042 | 2.04E-16     | ENSMUSG00000026447  | Pik32b              | 0.761343545 | 1.03E-06    |             |
| ENSMUSG000000001865   | Cpa3       | -0.834428753  | 0.035094303 | ENSMUSG00000035041  | Creb33     | 0.938593282 | 3.89E-31    | Nup210              | -0.780071005 | 0.000841206  | ENSMUSG00000019888  | Mg4c4               | 0.7596983   | 3.51E-299   |             |
| ENSMUSG000000035063   | Cdca3      | -0.834056073  | 4.01E-05    | ENSMUSG00000021620  | Aco2t12    | 0.937756984 | 3.88E-06    | Akrlc12             | -0.77987346  | 1.69E-16     | ENSMUSG00000043885  | Sic36a4             | 0.758808641 | 0.00372965  |             |
| ENSMUSG000000033307   | Mfr        | -0.832720425  | 1.24E-07    | ENSMUSG00000002735  | Chgb       | 0.936959055 | 1.45E-08    | Xdh                 | -0.78751861  | 1.15E-10     | ENSMUSG000000029763 | Exoc4               | 0.756671298 | 1.58E-05    |             |
| ENSMUSG00000002679    | Med6       | -0.832318403  | 0.032619666 | ENSMUSG000000038776 | Ephx1      | 0.934047879 | 3.26E-47    | Prr13               | -0.78735514  | 4.15E-10     | ENSMUSG000000034112 | Atpd22              | 0.756319668 | 2.05E-05    |             |
| ENSMUSG000000048782   | Insc       | -0.829253554  | 4.09E-05    | ENSMUSG000000061959 | Cest1e     | 0.933722131 | 3.72E-45    | G330548M08          | -0.78684898  | 1.49E-08     | ENSMUSG00000039095  | Erym                | 0.755023795 | 5.69E-26    |             |
| ENSMUSG000000038671   | Pde3b      | -0.829246341  | 0.008348828 | ENSMUSG000000051483 | Cbr1       | 0.931722113 | 3.42E-58    | Sic30a2             | -0.775399948 | 2.64E-09     | ENSMUSG00000027490  | C2r1                | 0.75117062  | 0.045454589 |             |
| ENSMUSG000000033794   | Sic17a9    | -0.828170985  | 0.005444034 | ENSMUSG000000015340 | Cybb       | 0.930943273 | 0.045076778 | Gdc                 | -0.770731111 | 9.32E-15     | ENSMUSG00000024397  | Air1                | 0.75057251  | 0.002604148 |             |
| ENSMUSG0000000100714  | 2010308F09 | -0.827390592  | 7.74E-08    | ENSMUSG000000046805 | Mpeg1      | 0.929729457 | 0.002989864 | Alch9a1             | -0.766386539 | 2.48E-06     | ENSMUSG000000031355 | Arhgap6             | 0.748636742 | 0.003717512 |             |
| ENSMUSG000000033847   | Tcpin      | -0.82515579   | 0.013715055 | ENSMUSG000000056429 | Tgcn1      | 0.928613393 | 2.04E-18    | Sult1d1             | -0.765746682 | 5.00E-18     | ENSMUSG00000009019  | Gimp1a1             | 0.748154262 | 0.019765081 |             |
| ENSMUSG000000065547   | Cleca4     | -0.824715212  | 8.47E-14    | ENSMUSG000000073096 | Lrrc61     | 0.928422728 | 0.031199374 | Armdc3              | -0.763933159 | 0.021984813  | ENSMUSG000000033161 | Atpt1a1             | 0.746810711 | 0.003266641 |             |
| ENSMUSG00000007762    | Id3        | -0.824305738  | 3.92E-11    | ENSMUSG000000032066 | Coc        | 0.927370916 | 2.32E-21    | Rhoc                | -0.76377409  | 0.001527109  | ENSMUSG000000033769 | Exoc5b              | 0.746743272 | 0.001240041 |             |
| ENSMUSG0000000088252  | Snm30d3    | -0.823678837  | 2.01E-14    | ENSMUSG000000034265 | Zdhc1a2    | 0.926990596 | 0.009792354 | Cd96                | -0.762166292 | 0.019685121  | ENSMUSG00000024754  | Leap2               | 0.746246687 | 9.54E-30    |             |
| ENSMUSG000000050470   | Aer1b      | -0.822916711  | 0.015758577 | ENSMUSG000000055541 | Lair1      | 0.926553099 | 3.54E-07    | Tgpc4               | -0.758461762 | 0.000858235  | ENSMUSG00000102252  | Snmr                | 0.745989211 | 3.50E-19    |             |
| ENSMUSG0000000029385  | Cad2       | -0.820524095  | 4.43E-10    | ENSMUSG000000022946 | Lpaf1      | 0.924617343 | 0.003172242 | Gep1                | -0.754047632 | 4.63E-08     | ENSMUSG00000026827  | Gp2d                | 0.744355119 | 1.82E-15    |             |
| ENSMUSG000000041718   | Alg13      | -0.81362601   | 0.026521418 | ENSMUSG000000036905 | C1qb       | 0.922333415 | 0.03229553  | Me1                 | -0.753696276 | 3.62E-20     | ENSMUSG00000002212  | Edbrb               | 0.743747892 | 0.02883063  |             |
| ENSMUSG00000003037542 | Alch8a1    | -0.813459681  | 0.037401339 | ENSMUSG00000005677  | Nr13       | 0.921772891 | 2.29E-40    | Cilk1               | -0.752132738 | 3.62E-06     | ENSMUSG00000040253  | Gp7d                | 0.743722782 | 2.03E-08    |             |
| ENSMUSG000000032554   | Trf        | -0.811497345  | 3.28E-06    | ENSMUSG000000024887 | Asa2       | 0.921428342 | 0.000352417 | Saa3                | -0.752086721 | 0.012161377  | ENSMUSG000000032715 | Trb3                | 0.742440562 | 1.52E-08    |             |
| ENSMUSG000000043823   | Capk2      | -0.808389682  | 4.27E-06    | ENSMUSG000000003452 | Bhl        | 0.919070067 | 5.80E-07    | Cwcb                | -0.751989376 | 0.009191814  | ENSMUSG00000020277  | Pnk1                | 0.741515399 | 0.002140558 |             |
| ENSMUSG000000026140   | Rassf5     | -0.805802967  | 0.042658882 | ENSMUSG000000060336 | Zfp393     | 0.918635419 | 1.58E-06    | Httf7a1             | -0.75194304  | 0.043501025  | ENSMUSG000000030314 | Alg7                | 0.739322146 | 4.39E-05    |             |
| ENSMUSG000000035236   | Impd2-ps   | -0.805446415  | 0.008400777 | ENSMUSG000000051727 | Kctd14     | 0.915802962 | 1.04E-23    | Ptgr1               | -0.75163124  | 1.83E-09     | ENSMUSG000000079018 | Ly6c1               | 0.737561389 | 0.01640044  |             |
| ENSMUSG000000047272   | Cecacm1    | -0.803181998  | 2.88E-41    | ENSMUSG000000020828 | Pld2       | 0.915480151 | 0.00208908  | Ugt2a3              | -0.746614526 | 1.57E-32     | ENSMUSG000000036663 | Bwn3d               | 0.734582847 | 0.000913741 |             |
| ENSMUSG00000003031257 | Nox1       | -0.803107658  | 0.00318856  | ENSMUSG000000036304 | Zdhc2h3    | 0.908786311 | 3.14E-05    | Adgrd1              | -0.745878506 | 4.15E-11     | ENSMUSG00000004363  | Sct                 | 0.731554284 | 3.37E-45    |             |
| ENSMUSG000000039675   | Zland1     | -0.801137088  | 0.00530928  | ENSMUSG000000091780 | Scd2       | 0.90506219  | 3.15E-32    | G430710C18          | -0.742151382 | 7.06E-07     | ENSMUSG000000003528 | Sic25a1             | 0.730909898 | 1.43E-05    |             |
| ENSMUSG000000026285   | Atf3       | -0.800599277  | 0.047056656 | ENSMUSG000000042797 | Aqpl1      | 0.901809094 | 4.27E-15    | Naa40               | -0.740015746 | 0.032048707  | ENSMUSG00000024124  | Pss30               | 0.729049446 | 1.98E-29    |             |
| ENSMUSG000000025747   | Tgm        | -0.799822821  | 0.020395193 | ENSMUSG000000030207 | Fam234b    | 0.901024937 | 0.004866308 | AA467197            | -0.739697283 | 1.96E-15     | ENSMUSG00000028037  | If44                | 0.72705537  | 0.001720194 |             |
| ENSMUSG000000034294   | Plyra      | -0.799791227  | 2.92E-10    | ENSMUSG000000044017 | Adgrl1     | 0.898323036 | 1.41E-11    | Zfp628              | -0.737808061 | 0.020461029  | ENSMUSG000000033581 | Hgt2p2              | 0.724689586 | 2.07E-07    |             |
| ENSMUSG000000026520   | Pycr2      | -0.798754257  | 0.00665124  | ENSMUSG000000032766 | Gng11      | 0.89392642  | 9.89E-06    | Osblp1a             | -0.737243943 | 2.72E-09     | ENSMUSG00000019966  | Khl                 | 0.72328891  | 1.32E-07    |             |
| ENSMUSG000000047443   | Erfe       | -0.798259354  | 0.018426056 | ENSMUSG000000037664 | Cdtn1c     | 0.893469241 | 1.49E-08    | Cybs5a              | -0.736324283 | 4.24E-29     | ENSMUSG000000057346 | Apob9a              | 0.72288982  | 3.95E-21    |             |
| ENSMUSG00000002415    | Pttg1      | -0.797986842  | 2.13E-10    | ENSMUSG000000024521 | Pmpa1      | 0.8926503   | 0.000446015 | Cd9b9               | -0.734181089 | 0.008467421  | ENSMUSG000000055978 | Fut2                | 0.722393553 | 7.12E-20    |             |
| ENSMUSG000000055312   | Them7      | -0.797549807  | 0.035513762 | ENSMUSG000000025007 | Alch18a1   | 0.89230141  | 6.89E-21    | Cd34a4              | -0.732772558 | 3.36E-347    | ENSMUSG000000327788 | Pdk2                | 0.720039578 | 3.84E-07    |             |
| ENSMUSG000000060715   | Gmn        | -0            |             |                     |            |             |             |                     |              |              |                     |                     |             |             |             |

|                      |             |              |              |                       |            |             |             |                      |            |              |             |                      |            |              |             |
|----------------------|-------------|--------------|--------------|-----------------------|------------|-------------|-------------|----------------------|------------|--------------|-------------|----------------------|------------|--------------|-------------|
| ENSMUSG000000036298  | Slc2a13     | -0.696883815 | 0.003022027  | ENSMUSG000000027340   | Slc23a2    | 0.799933111 | 2.61E-07    | ENSMUSG000000033191  | Tie1       | -0.666883667 | 0.004349782 | ENSMUSG00000016409   | Nkap       | 0.655449176  | 0.048388236 |
| ENSMUSG000000003971  | Cep131      | -0.694013281 | 0.032533312  | ENSMUSG000000020901   | PikR5      | 0.769899151 | 0.006518324 | ENSMUSG000000020955  | Tmem107    | -0.668815575 | 0.00959571  | ENSMUSG000000025579  | Gaa        | 0.655379077  | 0.006939633 |
| ENSMUSG000000044884  | Tent5c      | -0.693512326 | 1.64E-05     | ENSMUSG000000073557   | Ppp1r12b   | 0.793714277 | 0.013807886 | ENSMUSG000000008656  | Rdh16      | -0.668243473 | 1.48E-06    | ENSMUSG000000052336  | C3or1      | 0.654421102  | 0.040301779 |
| ENSMUSG000000051978  | Erich1      | -0.693036121 | 0.012849896  | ENSMUSG000000053769   | Yyb1b      | 0.792742865 | 0.000151948 | ENSMUSG000000008540  | Mgat1      | -0.668184503 | 0.026480238 | ENSMUSG000000000732  | Isoc1      | 0.654250879  | 0.038753168 |
| ENSMUSG000000002476  | Epb4114a    | -0.693320589 | 3.61E-13     | ENSMUSG000000009648   | Gm4221     | 0.799276822 | 0.01653401  | ENSMUSG000000008546  | Iqgap3     | -0.667894563 | 0.049470033 | ENSMUSG000000056493  | Foxl1      | 0.654250115  | 4.27E-06    |
| ENSMUSG000000003048  | Adh1n11     | -0.692847641 | 1.18E-07     | ENSMUSG000000026043   | Col3a1     | 0.791930854 | 9.18E-08    | ENSMUSG000000021326  | Entpd5     | -0.664552796 | 4.66E-07    | ENSMUSG000000048874  | Phf3       | 0.650078077  | 4.22E-09    |
| ENSMUSG000000007035  | Tripap83    | -0.692751991 | 0.048922138  | ENSMUSG000000061906   | Ugt2b38    | 0.791030635 | 0.000789296 | ENSMUSG000000008299  | Gm1299     | -0.663988236 | 0.022913951 | ENSMUSG000000017679  | Phn1       | 0.650059862  | 0.000654262 |
| ENSMUSG000000033172  | Insig2      | -0.691449316 | 1.12E-09     | ENSMUSG000000038496   | Slc19a3    | 0.791071921 | 1.53E-10    | ENSMUSG000000021365  | Ndd9       | -0.663102653 | 0.010912817 | ENSMUSG000000029188  | Slc34a2    | 0.650062855  | 7.32E-09    |
| ENSMUSG000000006908  | Tlcd3a      | -0.690017275 | 0.000377942  | ENSMUSG000000030353   | Cyp2c29    | 0.791079362 | 6.37E-60    | ENSMUSG000000024776  | Stamp1b    | -0.662390528 | 0.004048999 | ENSMUSG000000036427  | Gpi1       | 0.649686587  | 9.20E-12    |
| ENSMUSG000000074440  | Defa3       | -0.686950717 | 0.04521167   | ENSMUSG000000024738   | Pga5a      | 0.791016881 | 0.001161853 | ENSMUSG0000000303585 | Scat14c2   | -0.662075499 | 2.29E-15    | ENSMUSG000000033344  | Gtpbp6     | 0.648683049  | 0.037050981 |
| ENSMUSG000000004755  | S100a16     | -0.686350395 | 7.21E-10     | ENSMUSG0000000107681  | 4930528H21 | 0.791075874 | 0.002775874 | ENSMUSG000000082211  | Defa27     | -0.659160277 | 0.000547211 | ENSMUSG000000054590  | Wdr89      | 0.64822786   | 0.012218937 |
| ENSMUSG0000000020897 | Aurbk       | -0.685433962 | 0.000655942  | ENSMUSG00000120391    | Gm1308     | 0.791016393 | 9.79E-05    | ENSMUSG000000038151  | Prdm1      | -0.659046329 | 0.01152163  | ENSMUSG000000052212  | Cd177      | 0.648159335  | 2.59E-08    |
| ENSMUSG0000000030338 | Hmgm2       | -0.685178775 | 0.027484367  | ENSMUSG000000031377   | Bmx        | 0.791016223 | 0.002159169 | ENSMUSG000000019942  | Cdk1       | -0.659033083 | 0.00848051  | ENSMUSG000000021273  | Frdt1      | 0.647294856  | 2.13E-07    |
| ENSMUSG0000000076437 | Selenoh     | -0.684294669 | 0.046997051  | ENSMUSG000000098037   | Gm1765     | 0.791016146 | 0.039551596 | ENSMUSG00000054598   | 9130230L23 | -0.657762605 | 1.08E-09    | ENSMUSG000000027198  | Ext2       | 0.643103921  | 0.001532551 |
| ENSMUSG0000000004730 | Adcgr1      | -0.68407279  | 0.005430765  | ENSMUSG00000000014543 | Kir4r17    | 0.791015687 | 9.39E-07    | ENSMUSG000000028617  | Lrrc42     | -0.657106518 | 4.19E-16    | ENSMUSG000000032294  | Pkm        | 0.642922042  | 8.92E-52    |
| ENSMUSG000000022221  | Ripk3       | -0.683914482 | 7.90E-07     | ENSMUSG000000041012   | Cmtm8      | 0.791014949 | 1.57E-06    | ENSMUSG000000545725  | Prr15      | -0.654936269 | 7.30E-15    | ENSMUSG000000039047  | Pigk       | 0.642483466  | 0.027252551 |
| ENSMUSG0000000041498 | Kir14       | -0.68352885  | 0.012708848  | ENSMUSG000000032315   | Cyp11a1    | 0.791014494 | 1.23E-09    | ENSMUSG000000028965  | Tnfrsf9    | -0.654087492 | 0.004505281 | ENSMUSG000000059598  | Ephb3      | 0.641233184  | 2.22E-11    |
| ENSMUSG0000000302254 | Kir23       | -0.683220427 | 2.39E-06     | ENSMUSG000000069922   | Ces3a      | 0.791014353 | 0.018563328 | ENSMUSG000000073402  | Gm6909     | -0.653592782 | 1.79E-10    | ENSMUSG000000031983  | L3t        | 0.642922044  | 1.25E-12    |
| ENSMUSG000000015943  | Bola1       | -0.681801837 | 0.002844741  | ENSMUSG000000040181   | Fmo1       | 0.791012449 | 0.018345782 | ENSMUSG000000030408  | Gm114      | -0.65331982  | 0.046749389 | ENSMUSG000000011296  | 2010001M07 | 0.639811607  | 2.81E-77    |
| ENSMUSG000000006384  | Cdc20       | -0.678287574 | 1.27E-05     | ENSMUSG000000033847   | Plag4g1    | 0.790159422 | 0.000187951 | ENSMUSG000000031327  | Chc1       | -0.652097688 | 7.52E-14    | ENSMUSG000000074405  | Zp1605     | 0.639299974  | 0.01875154  |
| ENSMUSG0000000030351 | Asah1       | -0.677957503 | 0.008127929  | ENSMUSG000000063317   | Usp31      | 0.789955661 | 0.019597778 | ENSMUSG000000027456  | Sdcbp2     | -0.651132014 | 1.54E-09    | ENSMUSG000000072082  | Cnrf       | 0.638725212  | 0.00695745  |
| ENSMUSG0000000052997 | Uba2        | -0.676508857 | 0.034474675  | ENSMUSG000000040697   | Dna41c16   | 0.788544989 | 0.020730953 | ENSMUSG000000030338  | Hmgd2      | -0.650855434 | 0.027484367 | ENSMUSG000000055204  | Antnr17    | 0.634369845  | 7.48E-09    |
| ENSMUSG000000036832  | Lpar3       | -0.673007098 | 0.034275011  | ENSMUSG000000030166   | Dgr2       | 0.788113835 | 0.00162002  | ENSMUSG000000088237  | I2rb       | -0.650782576 | 1.77E-05    | ENSMUSG000000047843  | Bn3        | 0.633876411  | 0.001754809 |
| ENSMUSG000000038172  | Tc39b       | -0.66956579  | 0.00017854   | ENSMUSG000000095115   | Htrpr1p2   | 0.78765425  | 6.80E-19    | ENSMUSG000000026823  | Hsd12      | -0.649542063 | 1.10E-06    | ENSMUSG000000030972  | Acsm5      | 0.633542868  | 5.50E-07    |
| ENSMUSG0000000068101 | Cerpm       | -0.669401607 | 0.024176019  | ENSMUSG000000021254   | Qpatrh21   | 0.786339321 | 0.035853265 | ENSMUSG000000048200  | Car2b2b    | -0.644374967 | 0.00712017  | ENSMUSG000000066441  | Rdh11      | 0.633346092  | 1.84E-17    |
| ENSMUSG0000000037345 | Cdc25b      | -0.662435293 | 0.002775596  | ENSMUSG000000046314   | Stxbp6     | 0.784574434 | 0.023023893 | ENSMUSG000000030748  | Ahdh6      | -0.642873438 | 0.003127019 | ENSMUSG000000044665  | Cnm2       | 0.633036332  | 0.000215467 |
| ENSMUSG000000051627  | H1f4        | -0.66201943  | 0.00206194   | ENSMUSG000000021209   | Ppp4r4     | 0.784514718 | 1.40E-10    | ENSMUSG000000020308  | Cd320      | -0.642029603 | 2.71E-05    | ENSMUSG000000080727  | C200202L13 | 0.631858512  | 0.023818348 |
| ENSMUSG00000004667   | PspH        | -0.660948667 | 0.014346646  | ENSMUSG000000052577   | Ahdh6      | 0.783666223 | 3.03E-19    | ENSMUSG000000023867  | Rappg3     | -0.641088967 | 0.030121144 | ENSMUSG000000029804  | Ctca       | 0.630936416  | 0.00294534  |
| ENSMUSG000000019872  | Smpd3a      | -0.66035479  | 0.000144801  | ENSMUSG000000022620   | Arsa       | 0.78365211  | 0.001997418 | ENSMUSG000000040304  | Cy30a3801F | -0.638170574 | 4.16E-13    | ENSMUSG000000042284  | Igtg1      | 0.630920619  | 0.02084471  |
| ENSMUSG0000000037155 | E4f1ebp1    | -0.659530502 | 0.000353571  | ENSMUSG000000030545   | Pex11a     | 0.783527855 | 5.26E-14    | ENSMUSG000000050109  | Cyp2c40    | -0.635943228 | 0.04426896  | ENSMUSG000000092923  | Clea7a     | 0.630560561  | 0.00283774  |
| ENSMUSG000000037305  | Cerps       | -0.657132912 | 0.012945209  | ENSMUSG000000025515   | Muc2       | 0.781154475 | 1.60E-33    | ENSMUSG000000056328  | Tmod4      | -0.635082501 | 0.02974621  | ENSMUSG000000009305  | Tmem184b   | 0.630058612  | 0.023198841 |
| ENSMUSG0000000033155 | Gatp2       | -0.656149516 | 0.000812053  | ENSMUSG000000038384   | Setd1b     | 0.780376862 | 8.56E-11    | ENSMUSG000000030107  | Rht125     | -0.633986385 | 2.79E-06    | ENSMUSG000000026131  | Dat        | 0.630010965  | 0.032435817 |
| ENSMUSG000000005473  | Hmgb2       | -0.655144799 | 0.002053144  | ENSMUSG000000033634   | Nat8r1     | 0.778198447 | 2.69E-05    | ENSMUSG000000032583  | Mon1a      | -0.633672207 | 0.021467857 | ENSMUSG000000044906  | 4930503L19 | 0.628827315  | 0.037468495 |
| ENSMUSG0000000000973 | Tbx2        | -0.654649789 | 0.047773101  | ENSMUSG000000045568   | Arhgef18   | 0.777524387 | 0.006349628 | ENSMUSG000000020373  | Ltc4s      | -0.633569722 | 9.63E-11    | ENSMUSG0000000501188 | Lcm10      | 0.628594057  | 0.008309343 |
| ENSMUSG000000007594  | Hapln4      | -0.654528232 | 0.011545977  | ENSMUSG000000020210   | Tsc22d1    | 0.775853725 | 1.25E-21    | ENSMUSG00000113769   | 53-04a0609 | -0.633259697 | 1.84E-10    | ENSMUSG000000028654  | Mycl       | 0.627875394  | 0.003419425 |
| ENSMUSG0000000027496 | Aurka       | -0.654299798 | 0.001165930  | ENSMUSG000000024501   | Dpyr3      | 0.775294286 | 5.40E-06    | ENSMUSG000000032322  | H2-Ea      | -0.633192555 | 8.44E-52    | ENSMUSG000000009905  | Kdsr       | 0.626758468  | 3.72E-05    |
| ENSMUSG0000000001014 | Icam4       | -0.654138131 | 0.013351547  | ENSMUSG000000098905   | Pip3       | 0.774679062 | 0.002088176 | ENSMUSG000000039209  | Pagr4      | -0.633132768 | 1.07E-24    | ENSMUSG000000020183  | Cpm        | 0.626551007  | 0.000506655 |
| ENSMUSG0000000033113 | Tac1        | -0.653328374 | 0.001418447  | ENSMUSG000000031381   | P2g5a      | 0.773829202 | 0.049395139 | ENSMUSG000000038209  | tnr1n      | -0.632412728 | 4.92E-08    | ENSMUSG000000006435  | Near1a1a   | 0.626383035  | 0.000176507 |
| ENSMUSG0000000006566 | Ampd3       | -0.652023193 | 0.000253038  | ENSMUSG000000030168   | Adipor2    | 0.768874223 | 1.11E-10    | ENSMUSG000000058908  | Plag2a     | -0.630736204 | 9.86E-21    | ENSMUSG000000046223  | Plaur      | 0.625082334  | 0.032968492 |
| ENSMUSG0000000064225 | Pag9        | -0.65193738  | 1.23E-101    | ENSMUSG000000024921   | Smarc2     | 0.767397778 | 3.82E-08    | ENSMUSG000000020901  | Pik3r5     | -0.628137825 | 0.006518324 | ENSMUSG0000000507103 | Nat8r1     | 0.622726331  | 0.04014616  |
| ENSMUSG0000000027340 | Cldn2       | -0.651333878 | 1.81E-22     | ENSMUSG000000038437   | Mlh6       | 0.766990674 | 1.06E-06    | ENSMUSG000000048473  | Subt6b     | -0.627793465 | 7.86E-21    | ENSMUSG000000035064  | Ezf2k      | 0.622241049  | 2.29E-09    |
| ENSMUSG0000000028545 | Bend5       | -0.650325643 | 8.02E-08     | ENSMUSG000000026103   | G16        | 0.765847643 | 7.24E-37    | ENSMUSG000000029650  | Slca4a3    | -0.62778617  | 0.0001302   | ENSMUSG000000041895  | Fat1       | 0.621335576  | 0.007467407 |
| ENSMUSG000000029239  | Erd1        | -0.650041273 | 0.003677289  | ENSMUSG000000043987   | Cep164     | 0.765367512 | 0.000148526 | ENSMUSG000000061848  | Gm5805     | -0.626610442 | 0.002731969 | ENSMUSG000000070034  | Sp110      | 0.620207561  | 5.45E-05    |
| ENSMUSG0000000063374 | 33000020B8F | -0.649344326 | 0.026788152  | ENSMUSG000000033917   | Gd1c       | 0.764435007 | 6.66E-26    | ENSMUSG000000025950  | Ish1       | -0.623726747 | 1.12E-19    | ENSMUSG000000085421  | 4732490B19 | 0.619954548  | 0.01707099  |
| ENSMUSG0000000096696 | Zfp960      | -0.648623807 | 0.048902709  | ENSMUSG000000043252   | Tmem64     | 0.764012185 | 4.25E-05    | ENSMUSG000000061959  | Ces1e      | -0.623108417 | 3.72E-45    | ENSMUSG000000030894  | Tpp3       | 0.619596895  | 0.000651315 |
| ENSMUSG0000000072315 | 2810408H1F  | -0.645679688 | 0.000223392  | ENSMUSG000000040249   | Lrp1       | 0.761864162 | 4.02E-09    | ENSMUSG000000071711  | Mst1       | -0.621172725 | 3.75E-14    | ENSMUSG000000020121  | Dp3        | 0.619492474  | 0.000277657 |
| ENSMUSG0000000205544 | Cox11       | -0.644100104 | 1.49E-09     | ENSMUSG000000079516   | Reg3a      | 0.761378911 | 1.14E-16    | ENSMUSG000000024052  | Lpn2       | -0.619736094 | 2.55E-08    | ENSMUSG000000034285  | Nirrnap1   | 0.618117178  | 9.80E-32    |
| ENSMUSG0000000037845 | Fdxac3b1    | -0.643871385 | 0.000948397  | ENSMUSG000000037750   | Fam222b    | 0.75993432  | 3.70E-09    | ENSMUSG000000018899  | I1         | -0.619568534 | 1.41E-21    | ENSMUSG000000022922  | Pmp1       | 0.617864861  | 0.023642109 |
| ENSMUSG0000000070488 | Snrnp40     | -0.642358058 | 0.015063984  | ENSMUSG000000004151   | Etv1       | 0.756709638 | 0.00149941  | ENSMUSG000000019989  | Enpp3      | -0.618114149 | 7.43E-76    | ENSMUSG000000036333  | Kidms220   | 0.6176760627 | 0.001527028 |
| ENSMUSG000000003732  | Cappz1a     | -0.642014466 | 0.0221196554 | ENSMUSG000000052392   | Bcl1       | 0.756206997 | 0.002666373 | ENSMUSG000000026879  | Gen        | -0.617643292 | 1.35E-83    | ENSMUSG000000018678  | Top2       | 0.6174774071 | 0.046713742 |
| ENSMUSG000000006904  | Ar1         | -0.640341022 | 0.000170409  | ENSMUSG000000018796   | Acsl       |             |             |                      |            |              |             |                      |            |              |             |

|                      |            |              |             |                      |            |             |             |
|----------------------|------------|--------------|-------------|----------------------|------------|-------------|-------------|
| ENSMUSG00000026622   | Nek2       | -0.587077142 | 0.006035309 | ENSMUSG00000020261   | Slc36a1    | 0.681781812 | 8.44E-07    |
| ENSMUSG00000028567   | Tnxd1c2    | -0.586537865 | 1.64E-05    | ENSMUSG00000023057   | Fabp2      | 0.681494973 | 0.000445521 |
| ENSMUSG00000028612   | Skap2      | -0.586289896 | 7.88E-11    | ENSMUSG000000060935  | Tmem263    | 0.680802174 | 6.44E-11    |
| ENSMUSG000000050912  | Tmem123    | -0.583805659 | 0.004658705 | ENSMUSG000000088551  | Zfp467     | 0.680540056 | 2.08E-11    |
| ENSMUSG00000026188   | Ptprn18    | -0.583781662 | 6.38E-18    | ENSMUSG00000040943   | Tet2       | 0.677934312 | 0.00032707  |
| ENSMUSG000000120425  | Ndufr4b    | -0.581653471 | 1.98E-06    | ENSMUSG000000018820  | Zyhef2     | 0.677929002 | 0.000315398 |
| ENSMUSG0000002482    | Aacas      | -0.580474349 | 1.03E-11    | ENSMUSG000000042035  | Ylnv2      | 0.67736301  | 0.000266846 |
| ENSMUSG000000023871  | Dyrmk      | -0.580233159 | 0.03598728  | ENSMUSG000000026489  | Coq8a      | 0.677496319 | 2.01E-05    |
| ENSMUSG000000092981  | Ggh        | -0.580142467 | 0.01737258  | ENSMUSG000000033854  | Kcnk10     | 0.674260456 | 1.45E-18    |
| ENSMUSG000000001761  | Smo        | -0.579310098 | 0.035189454 | ENSMUSG000000033313  | Fbw8       | 0.674024088 | 0.011062313 |
| ENSMUSG000000050982  | Apcl10a    | -0.577098966 | 0.001991487 | ENSMUSG0000000036138 | Acaa1a     | 0.673559664 | 6.47E-11    |
| ENSMUSG000000079148  | Atg4a      | -0.576905549 | 3.05E-05    | ENSMUSG000000011492  | 6820431F20 | 0.673151256 | 0.007786579 |
| ENSMUSG000000022003  | Slc25a30   | -0.576898264 | 0.001873809 | ENSMUSG0000000015627 | Gata5      | 0.672293565 | 1.06E-11    |
| ENSMUSG000000056209  | Npm3       | -0.576694864 | 0.001510097 | ENSMUSG000000042292  | Mrf1a      | 0.670892096 | 0.02715623  |
| ENSMUSG000000022584  | Ly6c2      | -0.575279138 | 6.26E-08    | ENSMUSG000000036887  | C1qa       | 0.670173196 | 7.31E-06    |
| ENSMUSG000000024030  | Abcg1      | -0.574982486 | 0.005278011 | ENSMUSG0000000507604 | Lmo1d1     | 0.666873173 | 1.18E-10    |
| ENSMUSG000000020624  | Epb4111    | -0.572600223 | 2.56E-12    | ENSMUSG0000000041415 | Dicer1     | 0.666565963 | 0.030977245 |
| ENSMUSG000000021108  | Hat1       | -0.571758387 | 0.001988759 | ENSMUSG000000059555  | Tor1a      | 0.665470175 | 0.036167935 |
| ENSMUSG000000058618  | Defa39     | -0.571694155 | 0.04630545  | ENSMUSG000000039568  | Uhr4a      | 0.664755008 | 0.004476195 |
| ENSMUSG000000035678  | Kir15      | -0.570467716 | 0.000488647 | ENSMUSG000000020121  | Srgap1     | 0.664404087 | 0.001704748 |
| ENSMUSG000000050623  | Klf219a    | -0.569837125 | 0.018174199 | ENSMUSG000000031886  | Ces2e      | 0.662874491 | 1.40E-24    |
| ENSMUSG000000053581  | Zlfand2a   | -0.569591555 | 0.1827205   | ENSMUSG000000021208  | Ht72b      | 0.664733993 | 2.86E-19    |
| ENSMUSG00000006766   | Rerp1      | -0.568701964 | 2.73E-07    | ENSMUSG000000002458  | Rtnr4      | 0.660665812 | 2.55E-25    |
| ENSMUSG000000001228  | Uhrf1      | -0.56821465  | 0.000373215 | ENSMUSG000000026389  | Steap3     | 0.660648025 | 0.000666661 |
| ENSMUSG0000000001517 | Xorr1      | -0.567970707 | 0.000304724 | ENSMUSG000000054226  | Tnrbk      | 0.660477999 | 8.50E-11    |
| ENSMUSG0000000042643 | Timm22     | -0.567143071 | 0.012733338 | ENSMUSG000000036368  | Rfmd2      | 0.659211863 | 0.001019129 |
| ENSMUSG000000002086  | Rtmd462N17 | -0.566173076 | 0.044373609 | ENSMUSG000000054282  | Tmem86b    | 0.658373885 | 3.66E-09    |
| ENSMUSG000000029804  | Herc3      | -0.565772773 | 0.00924354  | ENSMUSG000000040913  | Fbw3       | 0.657887795 | 0.015824669 |
| ENSMUSG000000011674  | Dcum1d4    | -0.565486344 | 4.35E-05    | ENSMUSG000000030233  | Dv1s       | 0.657655812 | 0.04533113  |
| ENSMUSG0000000074802 | Gad23      | -0.564590508 | 0.049244394 | ENSMUSG000000068323  | Slc4a5     | 0.657546639 | 4.31E-17    |
| ENSMUSG000000004558  | Ndrp2      | -0.564280682 | 2.80E-08    | ENSMUSG000000031575  | Aah2l      | 0.656959327 | 0.000116562 |
| ENSMUSG000000050583  | C8g        | -0.563039925 | 2.96E-09    | ENSMUSG000000020950  | Slk        | 0.656424532 | 5.07E-16    |
| ENSMUSG000000016999  | Mut1266    | -0.562657882 | 0.000321563 | ENSMUSG000000008611  | Kctd11a    | 0.656304821 | 2.65E-05    |
| ENSMUSG000000044763  | Tmm10c     | -0.562633301 | 0.007058823 | ENSMUSG000000089774  | Slc5a3     | 0.656284614 | 0.000248451 |
| ENSMUSG000000031827  | Cott1      | -0.562187442 | 0.014262929 | ENSMUSG000000044857  | Lemc2      | 0.655045261 | 0.003597902 |
| ENSMUSG000000026611  | Tnni1      | -0.561750833 | 0.000172223 | ENSMUSG000000097392  | Tocf1      | 0.654491901 | 5.76E-07    |
| ENSMUSG000000033777  | Anln       | -0.560815682 | 0.003298138 | ENSMUSG00000004621   | Cefr1      | 0.653315977 | 0.00447197  |
| ENSMUSG000000002297  | Dbr4       | -0.560769978 | 0.004317406 | ENSMUSG000000040820  | Hlcs       | 0.652358547 | 0.022310515 |
| ENSMUSG000000055200  | Satr3d3    | -0.559719963 | 0.00747671  | ENSMUSG00000003119   | Cdk12      | 0.652635096 | 3.75E-05    |
| ENSMUSG000000020405  | Fabp6      | -0.559064829 | 1.51E-180   | ENSMUSG000000025091  | Plnlprr2   | 0.652030247 | 6.88E-15    |
| ENSMUSG000000007849  | Rh3dml     | -0.557608293 | 0.039640743 | ENSMUSG00000001700   | Gmrd2b     | 0.651601885 | 1.05E-74    |
| ENSMUSG000000036789  | Inzf2      | -0.556597493 | 0.005563449 | ENSMUSG000000030201  | Rp6        | 0.651150118 | 1.61E-08    |
| ENSMUSG000000020581  | Agf2       | -0.556896963 | 8.43E-08    | ENSMUSG000000035053  | Ltrf13     | 0.650646488 | 8.07E-05    |
| ENSMUSG000000004162  | Kir21b     | -0.556588662 | 0.042995412 | ENSMUSG000000074405  | Zfp865     | 0.650062834 | 0.01187514  |
| ENSMUSG000000026614  | Slc3a10a   | -0.556491894 | 1.98E-07    | ENSMUSG000000040997  | Ahh4d      | 0.649760028 | 0.000163143 |
| ENSMUSG000000087651  | 1500009L16 | -0.554428272 | 2.38E-07    | ENSMUSG000000050533  | Igf1r      | 0.64908426  | 2.40E-13    |
| ENSMUSG000000022469  | Rapgef3    | -0.551996651 | 0.030121144 | ENSMUSG00000120268   | Gm1032     | 0.648905704 | 0.049024002 |
| ENSMUSG000000039994  | Timeless   | -0.551957614 | 0.000881497 | ENSMUSG000000050225  | Plekha8    | 0.647861263 | 5.23E-05    |
| ENSMUSG000000027624  | Mpl11      | -0.551814146 | 4.10E-06    | ENSMUSG000000053004  | Hrh1       | 0.646329717 | 0.001080760 |
| ENSMUSG000000022013  | Dnajc15    | -0.550536207 | 1.84E-10    | ENSMUSG000000068245  | Phf11d     | 0.645394399 | 3.20E-10    |
| ENSMUSG000000022616  | Psmel1     | -0.549598896 | 3.68E-11    | ENSMUSG000000022720  | Retreg1    | 0.64279332  | 5.66E-18    |
| ENSMUSG000000079114  | Defa2      | -0.549502573 | 7.55E-016   | ENSMUSG000000061740  | Cyp2d22    | 0.642698774 | 8.80E-05    |
| ENSMUSG000000020492  | Sklf2      | -0.549429212 | 0.010519194 | ENSMUSG000000042308  | Setd1a     | 0.642698085 | 0.0410229   |
| ENSMUSG000000038543  | Degs1      | -0.547858473 | 1.96E-14    | ENSMUSG000000045598  | Zfp553     | 0.642399312 | 0.002717478 |
| ENSMUSG000000033637  | Capn5      | -0.547119321 | 2.44E-05    | ENSMUSG000000054843  | Atnl1      | 0.641233305 | 0.000357161 |
| ENSMUSG000000035212  | Leprot     | -0.546602354 | 0.044354991 | ENSMUSG000000089960  | Ugt1a1     | 0.639867299 | 5.94E-05    |
| ENSMUSG000000039823  | E2f2       | -0.54563395  | 4.46E-11    | ENSMUSG000000022265  | Ank        | 0.63896632  | 2.17E-11    |
| ENSMUSG000000064627  | Kmt2748    | -0.545470595 | 8.63E-20    | ENSMUSG000000028517  | Pipp3      | 0.638602228 | 0.000208176 |
| ENSMUSG00000004365   | Klf10      | -0.544283197 | 0.034550032 | ENSMUSG00000002634   | Yaf2       | 0.637947218 | 0.008655701 |
| ENSMUSG000000026828  | Galm5      | -0.543783447 | 0.00307304  | ENSMUSG000000038418  | Egr1       | 0.636487397 | 1.74E-09    |
| ENSMUSG000000044906  | 930503L19  | -0.542504824 | 0.034768495 | ENSMUSG000000068115  | Ninl       | 0.636436961 | 0.013006961 |
| ENSMUSG000000027835  | Pcdol10    | -0.542106035 | 3.71E-09    | ENSMUSG000000050573  | Mxip1      | 0.636123818 | 2.11E-11    |
| ENSMUSG000000030361  | Gpr160     | -0.539942296 | 0.007350991 | ENSMUSG000000022790  | Gstm4      | 0.635124131 | 2.83E-30    |
| ENSMUSG000000001525  | Tubb5      | -0.536869245 | 3.68E-09    | ENSMUSG000000040274  | Cdk6       | 0.63497297  | 1.57E-06    |
| ENSMUSG000000033526  | Er1a       | -0.53615682  | 0.001266079 | ENSMUSG000000061143  | Mam3       | 0.634967611 | 0.00059653  |
| ENSMUSG000000030326  | Prodh      | -0.535687081 | 4.29E-06    | ENSMUSG000000083019  | Gme222     | 0.633580806 | 0.000242727 |
| ENSMUSG000000078185  | Chrn1      | -0.53556501  | 0.005058815 | ENSMUSG000000057069  | Ero1b      | 0.632999368 | 0.027736522 |
| ENSMUSG000000021774  | Ube2e1     | -0.534738181 | 0.000327924 | ENSMUSG000000014771  | Pdc2d      | 0.631842543 | 0.032537862 |
| ENSMUSG000000041959  | Slc31a     | -0.532388861 | 0.003982743 | ENSMUSG0000000106352 | S033403H07 | 0.631340981 | 0.000180467 |
| ENSMUSG0000000500410 | Mom5       | -0.532286571 | 0.002902749 | ENSMUSG000000057982  | Zfp809     | 0.631068718 | 0.039896575 |
| ENSMUSG000000030695  | Aldoa      | -0.531888449 | 5.04E-08    | ENSMUSG000000073468  | Sh2d1      | 0.63034437  | 0.0081157   |
| ENSMUSG000000028268  | Gbp3       | -0.531702133 | 4.13E-06    | ENSMUSG000000021221  | Dp3        | 0.629297985 | 0.000277657 |
| ENSMUSG000000068246  | Apol9b     | -0.531182852 | 3.34E-07    | ENSMUSG000000022651  | Retnlg     | 0.628899213 | 0.017329148 |
| ENSMUSG000000078173  | Torm5      | -0.529394659 | 0.000151342 | ENSMUSG000000026692  | Fmo4       | 0.628580593 | 0.005135732 |
| ENSMUSG000000076212  | Fyb2       | -0.52724814  | 1.37E-06    | ENSMUSG000000044783  | A730008H23 | 0.628142943 | 0.006499982 |
| ENSMUSG000000030623  | Psmc4      | -0.526102233 | 0.000225596 | ENSMUSG000000020599  | Gk         | 0.628019681 | 0.000883349 |
| ENSMUSG00000002524   | Edn3       | -0.525374569 | 6.30E-28    | ENSMUSG000000021356  | Slc17a4    | 0.626877466 | 3.85E-18    |
| ENSMUSG000000031902  | Slc25a22   | -0.524978378 | 6.08E-13    | ENSMUSG000000048874  | Phf3       | 0.626480815 | 4.22E-09    |
| ENSMUSG000000030299  | Lrig1      | -0.522817716 | 5.93E-06    | ENSMUSG000000024958  | Gpr137     | 0.626404297 | 0.001988457 |
| ENSMUSG0000000204151 | Meh2       | -0.522812839 | 0.044569672 | ENSMUSG000000023913  | Plagf2     | 0.626253336 | 0.002620755 |
| ENSMUSG000000032067  | Pts        | -0.522557545 | 0.060207142 | ENSMUSG000000022305  | Lrp12      | 0.624223583 | 6.74E-09    |
| ENSMUSG000000004562  | Arhgef40   | -0.522516213 | 0.01323804  | ENSMUSG000000020182  | Ddc        | 0.623436342 | 2.65E-38    |
| ENSMUSG000000037392  | Alge6      | -0.522334756 | 0.017174658 | ENSMUSG000000043667  | Slc16a13   | 0.623184326 | 9.38E-05    |
| ENSMUSG000000028484  | Paip1      | -0.521521734 | 0.000345612 | ENSMUSG000000033943  | Mga        | 0.622737633 | 0.017890285 |
| ENSMUSG000000015249  | Anp32a     | -0.521403221 | 1.82E-05    | ENSMUSG000000010752  | Gm769a     | 0.622044073 | 9.12E-16    |
| ENSMUSG000000032940  | Tmprss4    | -0.520937947 | 0.000171221 | ENSMUSG000000021972  | Hmbx1      | 0.62189958  | 0.048750083 |
| ENSMUSG000000020431  | Ran        | -0.520876275 | 0.007169317 | ENSMUSG000000034245  | Hdc11      | 0.621540781 | 1.89E-05    |
| ENSMUSG000000030667  | Plk1       | -0.520389692 | 3.61E-09    | ENSMUSG000000026193  | Fnt1       | 0.621020626 | 2.57E-05    |
| ENSMUSG000000045103  | Dmd        | -0.519428868 | 0.006240103 | ENSMUSG000000020777  | Axol4      | 0.620964962 | 8.82E-06    |
| ENSMUSG000000025439  | Ptprn2     | -0.518399472 | 0.005899217 | ENSMUSG000000020097  | Sgp1       | 0.620393287 | 0.01128349  |
| ENSMUSG000000020758  | Casp7      | -0.517439548 | 2.44E-08    | ENSMUSG000000097571  | Jaxp       | 0.620317337 | 0.017353324 |
| ENSMUSG000000041119  | Pde4a      | -0.51682455  | 0.000368335 | ENSMUSG000000039844  | Rapgef1    | 0.619996495 | 0.000657803 |
| ENSMUSG000000069633  | Pex11g     | -0.516213111 | 1.04E-05    | ENSMUSG000000054676  | 1600014C10 | 0.619848853 | 1.62E-18    |
| ENSMUSG000000030978  | Rrm1       | -0.515171225 | 0.000293034 | ENSMUSG000000018574  | Acadvl     | 0.618589446 | 0.005430103 |
| ENSMUSG000000023951  | Vegfa      | -0.513322556 | 0.000529776 | ENSMUSG000000021068  | Tgfr1      | 0.618121068 | 1.94E-10    |
| ENSMUSG000000001095  | Slc13a2    | -0.513208741 | 1.56E-44    | ENSMUSG000000046982  | Tahz1      | 0.616848218 | 1.70E-07    |
| ENSMUSG000000048911  | Rnt2d      | -0.512530591 | 0.00083789  | ENSMUSG0000000204187 | Fam234a    | 0.616715938 | 0.004864242 |
| ENSMUSG000000036983  | Tb1m       | -0.511711376 | 0.017476017 | ENSMUSG000000020427  | Igftrb3    | 0.615646897 | 1.93E-07    |
| ENSMUSG000000032182  | Vipr2      | -0.511527825 | 0.002345684 | ENSMUSG000000006435  | Neur1a     | 0.615618492 | 4.27E-05    |
| ENSMUSG000000030587  | Enp1       | -0.510547595 | 0.023618952 | ENSMUSG000000038175  | Myli1      | 0.614381    |             |

|                       |           |              |             |
|-----------------------|-----------|--------------|-------------|
| ENSMUSG00000022391    | Rangap1   | -0.495349301 | 1.79E-11    |
| ENSMUSG000000018395   | Kif3a     | -0.494141487 | 0.007556482 |
| ENSMUSG000000020620   | Atg4d     | -0.494070606 | 1.71E-11    |
| ENSMUSG000000056529   | Ptfrf     | -0.493585711 | 1.92E-13    |
| ENSMUSG000000037130   | Pmn3      | -0.493221938 | 1.00E-11    |
| ENSMUSG000000030761   | Nme1      | -0.492891729 | 0.007066435 |
| ENSMUSG000000007330   | Wwp2      | -0.491746703 | 0.00232727  |
| ENSMUSG000000007414   | Clic1     | -0.491500153 | 3.51E-15    |
| ENSMUSG000000018678   | Sp2       | -0.491070459 | 0.046713742 |
| ENSMUSG000000031948   | Kars      | -0.490717891 | 0.013622943 |
| ENSMUSG000000004480   | Diaph2    | -0.490400903 | 0.003044188 |
| ENSMUSG000000021025   | Ntkbia    | -0.490376883 | 1.90E-12    |
| ENSMUSG000000023918   | Ttc39a    | -0.489841607 | 2.33E-05    |
| ENSMUSG000000030095   | Tmem43    | -0.489838254 | 0.001990421 |
| ENSMUSG000000007417   | Gsta5     | -0.489500568 | 8.45E-24    |
| ENSMUSG000000022148   | Fyb       | -0.488128975 | 9.61E-13    |
| ENSMUSG000000002018   | Kat2a     | -0.488009764 | 0.039800051 |
| ENSMUSG00000109324    | Prrm1     | -0.486807871 | 0.007309413 |
| ENSMUSG000000002307   | Scly      | -0.484821145 | 1.27E-06    |
| ENSMUSG000000020330   | Hmnr      | -0.484605038 | 8.37E-05    |
| ENSMUSG000000027712   | Anxa5     | -0.484075599 | 0.01856162  |
| ENSMUSG000000019763   | Prrm1     | -0.483972393 | 0.00693704  |
| ENSMUSG0000000448     | Cisnp     | -0.483420066 | 0.000296132 |
| ENSMUSG000000007344   | Slc34a4   | -0.482640202 | 2.61E-38    |
| ENSMUSG000000055401   | Fbox6     | -0.482550632 | 1.45E-06    |
| ENSMUSG000000060373   | Pma3a     | -0.482467268 | 0.003544008 |
| ENSMUSG000000000614   | Calr      | -0.482021359 | 0.000231859 |
| ENSMUSG000000020526   | Znh13     | -0.481902066 | 0.034194934 |
| ENSMUSG000000034630   | Gyp11b    | -0.481847691 | 0.01308283  |
| ENSMUSG000000038496   | Scppdh    | -0.481607492 | 0.000198862 |
| ENSMUSG000000002618   | Timm21    | -0.48090183  | 5.51E-06    |
| ENSMUSG000000025934   | Gata4     | -0.480682427 | 1.34E-08    |
| ENSMUSG000000020109   | Hif1a     | -0.480311891 | 0.00053532  |
| ENSMUSG000000015652   | Steap1    | -0.479764714 | 0.01340911  |
| ENSMUSG000000025634   | Slc28a3   | -0.479422433 | 0.01781691  |
| ENSMUSG000000024668   | Sch2d7    | -0.478868728 | 7.73E-08    |
| ENSMUSG000000020733   | Smox      | -0.478835576 | 4.87E-18    |
| ENSMUSG000000028212   | Cone2     | -0.478804075 | 0.000447071 |
| ENSMUSG000000009613   | Hfxa-ps1  | -0.478503017 | 0.009631029 |
| ENSMUSG000000030677   | Kir12     | -0.4781321   | 0.002125223 |
| ENSMUSG0000000033114  | Slc35d2   | -0.477190422 | 9.23E-09    |
| ENSMUSG0000000029102  | Hgfca     | -0.476926632 | 3.91E-09    |
| ENSMUSG000000033177   | Tirm59    | -0.476900881 | 0.022447547 |
| ENSMUSG000000008862   | Umad1     | -0.476689205 | 0.017709793 |
| ENSMUSG000000025634   | Sell      | -0.475375402 | 0.005968545 |
| ENSMUSG000000054200   | Flar4     | -0.475344006 | 0.000477061 |
| ENSMUSG000000003620   | Sh3bp4    | -0.47523364  | 1.73E-09    |
| ENSMUSG000000001467   | Cyp51     | -0.475171757 | 0.000355903 |
| ENSMUSG000000034607   | Por1b     | -0.474905247 | 2.04E-07    |
| ENSMUSG000000023800   | Tiam2     | -0.474600565 | 0.001469193 |
| ENSMUSG000000007373   | Ljpt1     | -0.473992343 | 0.01172516  |
| ENSMUSG000000020330   | Fbxl17    | -0.473352523 | 0.04986443  |
| ENSMUSG000000006892   | Fbxl12    | -0.472385274 | 0.027736522 |
| ENSMUSG000000057107   | Tmem140   | -0.472055403 | 2.14E-06    |
| ENSMUSG000000006973   | Slfn9     | -0.469895936 | 0.01670766  |
| ENSMUSG000000050344   | Adh17a    | -0.469378405 | 0.006511955 |
| ENSMUSG000000001939   | Slc28a3   | -0.469237602 | 0.04222603  |
| ENSMUSG000000043668   | Tox3      | -0.469145758 | 6.86E-08    |
| ENSMUSG000000025545   | Clybl     | -0.468793149 | 1.66E-06    |
| ENSMUSG000000036235   | Ptprn1    | -0.468587693 | 2.58E-08    |
| ENSMUSG000000003412   | Lamtor1   | -0.468285005 | 0.000155204 |
| ENSMUSG000000062070   | Pgk1      | -0.466707592 | 4.77E-05    |
| ENSMUSG000000002153   | Gstm5     | -0.466556177 | 0.021542132 |
| ENSMUSG000000027638   | Mea1      | -0.466490906 | 0.006145375 |
| ENSMUSG000000025544   | Gusb      | -0.466170496 | 0.000365595 |
| ENSMUSG000000020706   | Dnac1c0   | -0.465706867 | 0.000171295 |
| ENSMUSG0000000019773  | Fbxo5     | -0.464393198 | 0.00502707  |
| ENSMUSG000000031974   | Abcd10    | -0.464181814 | 8.64E-11    |
| ENSMUSG000000028635   | Edn2      | -0.463139432 | 1.10E-14    |
| ENSMUSG000000030442   | Parp14    | -0.462755092 | 0.01889159  |
| ENSMUSG000000019088   | Dnae1l1   | -0.462692963 | 0.000343535 |
| ENSMUSG000000032058   | Pp2r1b    | -0.462646747 | 0.000785267 |
| ENSMUSG000000027372   | Selenof   | -0.462564425 | 0.000173235 |
| ENSMUSG000000007036   | Abhd16a   | -0.46232139  | 4.82E-06    |
| ENSMUSG000000030114   | Plp2      | -0.462153727 | 0.000315431 |
| ENSMUSG000000000484   | Mpk13     | -0.461576978 | 0.006903852 |
| ENSMUSG000000030492   | Slc7a9    | -0.460833294 | 0.000761763 |
| ENSMUSG000000050705   | Bloc1s2   | -0.460324129 | 0.033119485 |
| ENSMUSG000000035699   | Slc15a1   | -0.460246244 | 1.76E-59    |
| ENSMUSG000000029322   | Plac8     | -0.459633846 | 5.14E-33    |
| ENSMUSG000000019318   | Nubp2     | -0.459075034 | 0.008397378 |
| ENSMUSG000000001351   | Rap1g     | -0.459142773 | 0.024885058 |
| ENSMUSG000000026914   | Psm1d14   | -0.458152971 | 0.002461646 |
| ENSMUSG000000030157   | Plekha2   | -0.457651649 | 0.012156349 |
| ENSMUSG000000019668   | Vta1      | -0.457132498 | 0.000150254 |
| ENSMUSG00000002027160 | Cdc34     | -0.456596224 | 0.000689191 |
| ENSMUSG0000000061762  | Tac1      | -0.456499424 | 0.007967163 |
| ENSMUSG000000028793   | Rnf19b    | -0.456471921 | 0.005208681 |
| ENSMUSG000000032791   | Hnf1b     | -0.456294374 | 2.30E-05    |
| ENSMUSG000000039105   | Atg16v1g1 | -0.456062641 | 0.016932964 |
| ENSMUSG000000004080   | Hmnpa2p1  | -0.455564407 | 0.001156317 |
| ENSMUSG000000052906   | Ubnr8     | -0.455227064 | 0.039504754 |
| ENSMUSG0000000304192  | Lsm3      | -0.455012329 | 3.25E-08    |
| ENSMUSG000000006955   | Dazp1     | -0.453517888 | 0.037436518 |
| ENSMUSG000000021556   | Golm1     | -0.453267218 | 1.94E-05    |
| ENSMUSG000000032994   | Uba7      | -0.453023968 | 0.023476369 |
| ENSMUSG000000004596   | Arhgef10l | -0.452190823 | 1.82E-10    |
| ENSMUSG000000039616   | Moos      | -0.451483416 | 3.73E-07    |
| ENSMUSG000000037399   | Tirm40    | -0.45064548  | 0.001581644 |
| ENSMUSG000000010914   | Pdhr      | -0.450259753 | 6.40E-07    |
| ENSMUSG000000035493   | Tgfb1     | -0.449925214 | 1.13E-05    |
| ENSMUSG000000040432   | Ltb4r2    | -0.449638454 | 3.81E-06    |
| ENSMUSG000000026333   | Gin1      | -0.449558696 | 2.22E-05    |
| ENSMUSG000000049134   | Nrap      | -0.449889793 | 0.040924215 |
| ENSMUSG000000071180   | Smim15    | -0.448249782 | 2.04E-06    |
| ENSMUSG000000029465   | Arp3      | -0.447917286 | 4.90E-05    |
| ENSMUSG000000010826   | Ipw       | -0.447695031 | 1.93E-08    |
| ENSMUSG000000061132   | Bink      | -0.447330217 | 0.003621224 |
| ENSMUSG000000016946   | Kctd5     | -0.446773826 | 0.015668933 |
| ENSMUSG000000028648   | Ndrf5a    | -0.446154469 | 4.56E-06    |
| ENSMUSG000000028673   | Fuca1     | -0.445890574 | 1.47E-06    |
| ENSMUSG000000032766   | Alas1     | -0.443006097 | 0.00587982  |
| ENSMUSG000000038492   | Slc5a8    | -0.442649247 | 1.21E-194   |
| ENSMUSG000000038497   | Tmc30     | -0.442625784 | 1.33E-06    |
| ENSMUSG000000003949   | Nqo1      | -0.44228033  | 6.93E-12    |
| ENSMUSG000000062339   | Gm14      | -0.441953964 | 0.000248731 |
| ENSMUSG000000020733   | Prkra     | -0.441877379 | 0.006717311 |
| ENSMUSG00000004734    | Serpinb1a | -0.441553118 | 0.001995062 |
| ENSMUSG000000006313   | Upl1a     | -0.441420817 | 0.000195332 |
| ENSMUSG000000050762   | Fxyd3     | -0.440648352 | 0.000161492 |
| ENSMUSG000000040797   | Nrmp25    | -0.440339239 | 0.000120824 |
| ENSMUSG000000052298   | Cdc42as2  | -0.439685996 | 0.028516241 |

|                      |            |             |             |
|----------------------|------------|-------------|-------------|
| ENSMUSG000000010095  | Slc3a2     | 0.597933533 | 0.000658285 |
| ENSMUSG000000047730  | Fcgbp      | 0.597464111 | 9.10E-10    |
| ENSMUSG0000000046753 | Ccdc6b     | 0.596903266 | 0.000241517 |
| ENSMUSG000000059326  | Caf2ra     | 0.596556251 | 1.79E-14    |
| ENSMUSG000000025085  | Abiln1     | 0.595829495 | 0.004398497 |
| ENSMUSG000000079017  | H2f12a     | 0.595739655 | 9.90E-10    |
| ENSMUSG0000000040412 | Elapor1    | 0.594895909 | 2.08E-11    |
| ENSMUSG000000004565  | Pnp4a      | 0.594269353 | 0.023916835 |
| ENSMUSG0000000009957 | Mmp14      | 0.593763053 | 0.003730007 |
| ENSMUSG000000050174  | Nutb6      | 0.593677419 | 9.68E-05    |
| ENSMUSG0000000001288 | Rarg       | 0.592917574 | 0.000668699 |
| ENSMUSG000000039234  | Sec2d4     | 0.590626251 | 5.82E-21    |
| ENSMUSG000000052713  | Zfp608     | 0.589167788 | 0.003066681 |
| ENSMUSG000000015597  | Zfp318     | 0.588722665 | 0.000110198 |
| ENSMUSG000000047409  | Ctdsp1     | 0.588346733 | 1.09E-27    |
| ENSMUSG000000048000  | Glyf2      | 0.588220342 | 0.00021241  |
| ENSMUSG000000028152  | Tspan5     | 0.587649662 | 0.00051043  |
| ENSMUSG000000031445  | Pzr3       | 0.585785404 | 8.82E-05    |
| ENSMUSG000000058331  | Probs      | 0.585604089 | 0.012236267 |
| ENSMUSG000000018377  | Ver1       | 0.585140347 | 0.001832741 |
| ENSMUSG000000027198  | Ezr2       | 0.584671918 | 0.01532551  |
| ENSMUSG000000027341  | Tmem230    | 0.584464606 | 5.47E-06    |
| ENSMUSG000000058576  | Thra       | 0.583989052 | 0.025815408 |
| ENSMUSG000000044628  | Rnf208     | 0.583906481 | 3.94E-09    |
| ENSMUSG000000021775  | Nr1d2      | 0.582715664 | 0.000743749 |
| ENSMUSG000000026317  | Cin8       | 0.581908856 | 6.82E-12    |
| ENSMUSG000000064215  | H2f2       | 0.581456261 | 3.33E-21    |
| ENSMUSG000000040270  | Bach2      | 0.580520684 | 2.82E-06    |
| ENSMUSG000000021823  | Vcl        | 0.578841266 | 2.74E-05    |
| ENSMUSG000000027809  | Erfhd      | 0.577806437 | 4.75E-05    |
| ENSMUSG000000029647  | Par3       | 0.577340992 | 1.77E-05    |
| ENSMUSG000000035168  | Tanc1      | 0.577185687 | 4.31E-05    |
| ENSMUSG000000040447  | Sprr2      | 0.576452652 | 4.00E-10    |
| ENSMUSG000000030725  | Lipr2      | 0.576148703 | 0.02560107  |
| ENSMUSG000000028229  | Pmdn1      | 0.575778615 | 9.26E-26    |
| ENSMUSG000000020200  | Zc3h13     | 0.573690951 | 0.029140789 |
| ENSMUSG000000047671  | Span       | 0.571375768 | 1.24E-07    |
| ENSMUSG000000023232  | Sermc2     | 0.570917521 | 7.29E-08    |
| ENSMUSG000000021433  | Pac2       | 0.570753077 | 0.001316979 |
| ENSMUSG000000041417  | Pik3r1     | 0.570032123 | 0.000513393 |
| ENSMUSG000000037949  | Nr01       | 0.569719963 | 0.000267039 |
| ENSMUSG000000035258  | Vlpr1      | 0.569512967 | 0.000433254 |
| ENSMUSG000000047552  | Plekhh2    | 0.569412261 | 7.85E-05    |
| ENSMUSG000000030761  | Myo7a      | 0.569237305 | 0.029868586 |
| ENSMUSG000000057637  | Pdrn2      | 0.568615463 | 0.00113836  |
| ENSMUSG000000024140  | Epsa1      | 0.56802932  | 0.020981507 |
| ENSMUSG000000030583  | Sipa1l3    | 0.56645644  | 4.56E-06    |
| ENSMUSG000000009614  | Sardh      | 0.566237391 | 0.003884172 |
| ENSMUSG000000027854  | Sike1      | 0.564881048 | 0.00040374  |
| ENSMUSG000000010307  | Tmem88a    | 0.563820709 | 0.023835012 |
| ENSMUSG000000007817  | Zmiz1      | 0.562902845 | 8.98E-11    |
| ENSMUSG000000060600  | Eno3       | 0.562205231 | 0.000378771 |
| ENSMUSG000000086040  | Wlpf3      | 0.562195554 | 0.021404014 |
| ENSMUSG000000032500  | Ddk3       | 0.562071731 | 0.040924215 |
| ENSMUSG000000034801  | Sos2       | 0.561912014 | 0.009038371 |
| ENSMUSG00000121513   | Ptprg      | 0.561565423 | 0.01070431  |
| ENSMUSG000000023055  | Cacocao1   | 0.560413536 | 0.033378418 |
| ENSMUSG000000018415  | Gmd3       | 0.559900607 | 0.000609393 |
| ENSMUSG000000038150  | Oid4       | 0.559845969 | 1.97E-12    |
| ENSMUSG000000053986  | Ecn1       | 0.559099932 | 2.93E-10    |
| ENSMUSG000000034930  | Rhkn       | 0.557929734 | 0.005875082 |
| ENSMUSG000000032485  | Scap       | 0.557023994 | 3.90E-05    |
| ENSMUSG000000039270  | Megf9      | 0.557026396 | 1.08E-08    |
| ENSMUSG000000038538  | Ube1       | 0.556874051 | 0.000187236 |
| ENSMUSG000000059385  | De30033011 | 0.556612099 | 0.005267609 |
| ENSMUSG000000020565  | Scin       | 0.556554925 | 1.69E-07    |
| ENSMUSG000000028607  | Cp2f1      | 0.556541729 | 1.21E-09    |
| ENSMUSG00000044702   | Palb2      | 0.556394949 | 0.00056419  |
| ENSMUSG000000025745  | Hadha      | 0.555764435 | 8.66E-05    |
| ENSMUSG000000045725  | Prr15      | 0.555603365 | 7.30E-15    |
| ENSMUSG000000025762  | Larp1b     | 0.555020381 | 0.007133454 |
| ENSMUSG000000024604  | Pp         | 0.554855636 | 0.00649832  |
| ENSMUSG000000021034  | Myk2       | 0.553899848 | 0.015289963 |
| ENSMUSG000000010075  | Dmp1b      | 0.553972915 | 5.54E-11    |
| ENSMUSG000000030193  | Srxn1      | 0.553638877 | 0.022501547 |
| ENSMUSG000000032936  | Trak1      | 0.553596022 | 2.86E-08    |
| ENSMUSG000000032454  | Hsp26      | 0.553075153 | 1.49E-78    |
| ENSMUSG000000018555  | Nupg12     | 0.552886342 | 0.000138624 |
| ENSMUSG000000036644  | Tld1dbb    | 0.551810977 | 0.000214233 |
| ENSMUSG000000028565  | Nfia       | 0.551235776 | 3.08E-08    |
| ENSMUSG000000020816  | Rprnd2     | 0.550865784 | 0.000229663 |
| ENSMUSG000000029176  | Zcchc4     | 0.548317414 | 0.027632163 |
| ENSMUSG000000030214  | Pibid1     | 0.548125302 | 0.004005103 |
| ENSMUSG000000055204  | Ankrd17    | 0.545915684 | 7.48E-09    |
| ENSMUSG000000044501  | Kpnm       | 0.545218705 | 1.23E-05    |
| ENSMUSG000000006751  | Zfp758     | 0.544855669 | 0.001708505 |
| ENSMUSG000000033715  | Aktc1r4    | 0.544975082 | 1.85E-11    |
| ENSMUSG000000024968  | Rcor2      | 0.54280132  | 0.036570323 |
| ENSMUSG000000014361  | Gherk      | 0.542019942 | 0.005679057 |
| ENSMUSG000000064177  | Mxi1       | 0.54187918  | 7.28E-57    |
| ENSMUSG000000034430  | Zyxp2      | 0.541245426 | 0.00565397  |
| ENSMUSG000000008822  | Acd1       | 0.54120034  | 0.05167995  |
| ENSMUSG000000050580  | Ecmc1      | 0.540480187 | 7.36E-05    |
| ENSMUSG000000050395  | Aody9      | 0.54043864  | 0.001591163 |
| ENSMUSG000000022521  | Tnfr1f15   | 0.540410148 | 1.94E-09    |
| ENSMUSG000000031438  | Crebpb     | 0.540227126 | 1.06E-05    |
| ENSMUSG000000031438  | Rnf128     | 0.539828263 | 9.71E-07    |
| ENSMUSG000000064341  | ND1        | 0.539665517 | 0.028045237 |
| ENSMUSG000000057706  | Gpav4      | 0.539630633 | 0.004290263 |
| ENSMUSG000000045107  | Synd1      | 0.539394874 | 0.014667235 |
| ENSMUSG000000001911  | Nfx2       | 0.539025795 | 0.011492788 |
| ENSMUSG000000036333  | Dnd2       | 0.538707009 | 1.86E-12    |
| ENSMUSG000000056602  | Kidm220    | 0.538699382 | 0.001572026 |
| ENSMUSG000000033478  | Fryr       | 0.538550649 | 0.00581935  |
| ENSMUSG000000033266  | Phi02a     | 0.53853404  | 0.005975049 |
| ENSMUSG000000049940  | Phgm2      | 0.538400327 | 5.45E-12    |
| ENSMUSG0000000005951 | Shpck      | 0.538114643 | 5.51E-42    |
| ENSMUSG000000037692  | Adhc1      | 0.535929213 | 0.000354151 |
| ENSMUSG000000036298  | Adh1c1     | 0.535498104 | 5.73E-11    |
| ENSMUSG000000103711  | Patp2      | 0.53522774  | 2.67E-10    |
| ENSMUSG000000031732  | Phfip2     | 0.534820641 | 3.19E-05    |
| ENSMUSG000000020360  | Rgs2       | 0.534611142 | 4.74E-05    |
| ENSMUSG000000030458  | Ncstn      | 0.534034867 | 0.011223877 |
| ENSMUSG000000020661  | Dnm3a3     | 0.532849855 | 1.32E-06    |
| ENSMUSG000000031642  | Sh3r1f     | 0.532770183 | 1.79E-10    |
| ENSMUSG000000042810  | Kba1       | 0.532007521 | 1.26E-05    |
| ENSMUSG000000038244  | Micr2      | 0.531852559 | 1.05E-06    |
| ENSMUSG000000020105  | Lrig3      | 0.5316438   | 8.49E-08    |
| ENSMUSG000000023905  | Trifp1f2a  | 0.530777083 | 4.29E-05    |
| ENSMUSG000000022336  | Scg5       | 0.530386545 | 0.028011631 |
| ENSMUSG000000025034  | Trpm8      | 0.529359577 | 0.00214963  |

|                      |          |              |             |                      |          |              |             |                      |               |              |                      |                      |             |             |             |
|----------------------|----------|--------------|-------------|----------------------|----------|--------------|-------------|----------------------|---------------|--------------|----------------------|----------------------|-------------|-------------|-------------|
| ENSMUSG00000046733   | Gprc5a   | -0.43892976  | 0.021149436 | ENSMUSG000000096188  | Cmtrm4   | 0.52907271   | 9.83E-12    | ENSMUSG000000036718  | Mical2        | -0.405915706 | 0.001765034          | ENSMUSG000000037344  | Sic12a9     | 0.439654107 | 0.004342645 |
| ENSMUSG000000026701  | Prdx6    | -0.4389273   | 9.46E-07    | ENSMUSG000000024388  | Myo7b    | 0.52861613   | 0.006930624 | ENSMUSG000000035561  | Aldh1b1       | -0.40489401  | 3.93E-29             | ENSMUSG000000025930  | Msc         | 0.439229964 | 0.001677762 |
| ENSMUSG000000046756  | Mpsr7    | -0.438687103 | 0.000986761 | ENSMUSG000000039145  | Camk1d   | 0.528176684  | 1.71E-20    | ENSMUSG000000004074  | Rnf168        | -0.404366689 | 0.00107887           | ENSMUSG000000030157  | Clec2d      | 0.437534805 | 0.002699933 |
| ENSMUSG000000028367  | Txn1     | -0.437734162 | 2.70E-15    | ENSMUSG000000048126  | Ctla3a   | 0.527835332  | 0.005612862 | ENSMUSG000000022235  | Cmb1          | -0.403504494 | 1.78E-05             | ENSMUSG000000003149  | Prnf2       | 0.437026951 | 4.57E-05    |
| ENSMUSG000000027232  | Antr2    | -0.437237232 | 2.14E-10    | ENSMUSG000000029673  | Aut2     | 0.526066272  | 5.01E-06    | ENSMUSG000000005103  | Wdr1          | -0.402699748 | 5.48E-20             | ENSMUSG0000000031149 | Snmf8l      | 0.43695902  | 1.49E-10    |
| ENSMUSG000000027428  | Pdia3    | -0.436179562 | 0.002761641 | ENSMUSG000000024638  | Gyrf2c   | 0.525269409  | 0.000688803 | ENSMUSG000000023250  | Fos           | -0.402666515 | 0.001948042          | ENSMUSG000000027639  | Snmh1       | 0.434611847 | 2.01E-05    |
| ENSMUSG0000000024181 | Mpr28    | -0.435810525 | 1.71E-05    | ENSMUSG000000004426  | Atat1    | 0.524867496  | 8.66E-05    | ENSMUSG000000003554  | Tfr           | -0.402520384 | 3.28E-06             | ENSMUSG000000003497  | Campd       | 0.433813909 | 1.59E-06    |
| ENSMUSG0000000022848 | Sic19a4  | -0.435646581 | 0.041164597 | ENSMUSG000000038745  | Nlrp6    | 0.524686986  | 0.000365283 | ENSMUSG000000027688  | Nceh1         | -0.402261665 | 4.72E-10             | ENSMUSG000000029646  | Cdc2        | 0.43367661  | 0.033237671 |
| ENSMUSG0000000026175 | Clec2d   | -0.435361768 | 0.002699933 | ENSMUSG000000019890  | Nts      | 0.524292562  | 3.62E-23    | ENSMUSG000000003980  | Acac2         | -0.400992182 | 1.96E-69             | ENSMUSG000000026568  | Mpc2        | 0.432325223 | 0.2367657   |
| ENSMUSG0000000056612 | Ppp1r14b | -0.435340077 | 6.15E-05    | ENSMUSG0000000031633 | Sic25a4  | 0.524193484  | 8.46E-25    | ENSMUSG000000038372  | Tmem58        | -0.400751322 | 0.015298986          | ENSMUSG000000029004  | Kmt2c       | 0.432096097 | 1.76E-12    |
| ENSMUSG000000005188  | Lsm10    | -0.435076771 | 0.008309343 | ENSMUSG0000000004874 | Dglucy   | 0.5240343693 | 1.86E-54    | ENSMUSG000000021280  | Sic7a8        | -0.400749152 | 1.64E-08             | ENSMUSG000000006005  | Tpr         | 0.431476826 | 1.26E-08    |
| ENSMUSG0000000029730 | Mcm7     | -0.434790494 | 0.002040617 | ENSMUSG000000038976  | Ppp1r19b | 0.523830572  | 0.005901646 | ENSMUSG000000020422  | Tns3          | -0.400662636 | 3.58E-08             | ENSMUSG000000000131  | Xpo6        | 0.43146017  | 9.31E-06    |
| ENSMUSG000000006802  | E2m      | -0.434224091 | 2.46E-07    | ENSMUSG0000000059713 | Rcn3     | 0.523616778  | 0.00569076  | ENSMUSG000000019897  | Galm3         | -0.399181997 | 0.015694482          | Gmt702               | 0.431381275 | 0.013251376 |             |
| ENSMUSG0000000032009 | Sesn3    | -0.433827196 | 1.54E-06    | ENSMUSG0000000052062 | Pard3b   | 0.523499952  | 2.73E-15    | ENSMUSG000000030822  | Prr14         | -0.399079024 | 0.006212389          | ENSMUSG000000067942  | Zfp180      | 0.431094296 | 0.019310557 |
| ENSMUSG0000000046718 | Bst2     | -0.433739288 | 7.26E-07    | ENSMUSG0000000024947 | Men1     | 0.523482486  | 0.003375855 | ENSMUSG000000001938  | 4931406C07    | -0.39739348  | 1.37E-14             | ENSMUSG0000000022629 | Kir21a      | 0.430705459 | 2.83E-10    |
| ENSMUSG0000000064036 | Mro      | -0.4325259   | 0.012370556 | ENSMUSG0000000041235 | Cnd7     | 0.52340666   | 3.15E-07    | ENSMUSG000000025075  | Habp2         | -0.396413114 | 6.03E-07             | ENSMUSG000000037025  | Foxa2       | 0.430472934 | 0.036544717 |
| ENSMUSG0000000024963 | Dnajc4   | -0.432170257 | 0.000550684 | ENSMUSG0000000056182 | Chnd1    | 0.522801928  | 0.047670498 | ENSMUSG000000025544  | Tm9a2         | -0.395216782 | 0.000162157          | ENSMUSG0000000020817 | Rabep1      | 0.430156203 | 5.90E-06    |
| ENSMUSG000000002915  | Malsu1   | -0.432123457 | 0.000163342 | ENSMUSG0000000027739 | Rab33b   | 0.521959716  | 0.024466871 | ENSMUSG000000073399  | Trim40        | -0.394870786 | 0.001581644          | ENSMUSG000000027002  | Nckap1      | 0.429836090 | 0.001750757 |
| ENSMUSG0000000029270 | Dpk1a    | -0.43194341  | 0.001811975 | ENSMUSG000000009035  | Tmem184b | 0.521858263  | 0.023198941 | ENSMUSG000000002694  | Whap          | -0.393607675 | 0.007988532          | ENSMUSG0000000033854 | Kcnk10      | 0.429697595 | 1.45E-18    |
| ENSMUSG0000000041957 | Pkp2     | -0.431765819 | 0.00183989  | ENSMUSG000000027765  | P2ry1    | 0.521322296  | 0.012876154 | ENSMUSG000000002423  | Btg2          | -0.393558371 | 0.00267948           | ENSMUSG000000078920  | Hif4        | 0.429249317 | 1.89E-22    |
| ENSMUSG0000000023678 | Cep69    | -0.43140025  | 0.031886289 | ENSMUSG0000000021376 | P2ry1    | 0.521136129  | 3.12E-23    | ENSMUSG0000000040431 | Dhx8          | -0.393512089 | 0.000714428          | ENSMUSG000000055053  | Nfic        | 0.42915742  | 1.90E-09    |
| ENSMUSG0000000054766 | Set      | -0.430587702 | 7.29E-05    | ENSMUSG0000000051316 | Taf7     | 0.520214664  | 0.000418462 | ENSMUSG000000003039  | Sema4b        | -0.393203752 | 1.86E-06             | ENSMUSG000000029596  | Sdr1        | 0.429113071 | 1.76E-06    |
| ENSMUSG0000000026738 | Cenpl    | -0.430279956 | 0.023076627 | ENSMUSG0000000054874 | Pcn3     | 0.519792565  | 0.00037288  | ENSMUSG000000006206  | H2-M3         | -0.393185223 | 0.029616272          | ENSMUSG000000031960  | Aars        | 0.428279244 | 0.000532479 |
| ENSMUSG0000000046432 | Bex3     | -0.430157296 | 0.001516644 | ENSMUSG000000026918  | Brd3     | 0.519290167  | 4.77E-05    | ENSMUSG000000041747  | Utp1          | -0.393058317 | 0.000180467          | ENSMUSG000000029190  | DErtd579e   | 0.427956096 | 9.19E-13    |
| ENSMUSG0000000026738 | Pmmk     | -0.430137294 | 0.022019075 | ENSMUSG0000000044778 | Fas      | 0.518996353  | 2.14E-05    | Itf22                | -0.392797103  | 0.002178827  | ENSMUSG000000051079  | Rgs13                | 0.42794331  | 7.96E-06    |             |
| ENSMUSG0000000042524 | Sunr2    | -0.42996062  | 0.006284939 | ENSMUSG000000023367  | Tmem176a | 0.518486273  | 0.018577368 | Apocb1               | -0.392675358  | 4.83E-12     | ENSMUSG000000120113  | Fam120aas            | 0.427877448 | 0.005268484 |             |
| ENSMUSG0000000042396 | Bhr      | -0.429556358 | 3.36E-09    | ENSMUSG0000000029994 | Anxa4    | 0.5167099    | 4.76E-35    | ENSMUSG000000037321  | Pan1          | -0.3923578   | 8.07E-13             | ENSMUSG0000000024947 | Fmn1        | 0.427754809 | 0.003758555 |
| ENSMUSG0000000036781 | Pp2r71   | -0.42733978  | 0.000498526 | ENSMUSG0000000023247 | Guc2a2   | 0.516346752  | 3.81E-59    | Pds2e                | -0.392349056  | 0.000457891  | ENSMUSG000000063273  | Naa23                | 0.427024908 | 0.001708375 |             |
| ENSMUSG0000000031672 | Got2     | -0.427018345 | 0.001611584 | ENSMUSG0000000022057 | Adrmec1  | 0.516257723  | 7.61E-06    | Cd200i2              | -0.392241133  | 0.013784488  | ENSMUSG0000000034131 | Tact2d3              | 0.426792891 | 1.03E-07    |             |
| ENSMUSG0000000040883 | Tmem205  | -0.426866523 | 6.75E-08    | ENSMUSG0000000090213 | Peds1    | 0.515811508  | 0.000367741 | Pgmrc1               | -0.392032575  | 6.76E-16     | ENSMUSG000000048922  | Cvca2                | 0.426216303 | 0.006235582 |             |
| ENSMUSG0000000034932 | Mpr54    | -0.426456171 | 3.36E-10    | ENSMUSG0000000051285 | Pomtd1   | 0.515629956  | 0.00849754  | Cdc38                | -0.391608542  | 5.76E-18     | Dco2                 | 0.426063276          | 0.000743915 |             |             |
| ENSMUSG0000000060615 | Anq4     | -0.4263901   | 1.69E-12    | ENSMUSG0000000041720 | P4ka     | 0.515324916  | 0.005248254 | Shn3r2               | -0.391144049  | 5.71E-05     | ENSMUSG000000026576  | Atp1b1               | 0.425524439 | 2.50E-07    |             |
| ENSMUSG0000000026738 | Dnmt1    | -0.426341711 | 0.000252785 | ENSMUSG0000000034947 | Tmem106a | 0.515158326  | 0.000552727 | Gulac3               | -0.390915504  | 0.02169646   | ENSMUSG000000071064  | Zfp827               | 0.425219149 | 9.83E-05    |             |
| ENSMUSG0000000026738 | Hdb17b7  | -0.425335126 | 0.000657318 | ENSMUSG0000000056124 | B4gat6   | 0.514630551  | 1.51E-10    | ENSMUSG000000009585  | Apocb3        | -0.390623895 | 0.000667899          | ENSMUSG000000063179  | Psfk        | 0.424949641 | 2.41E-05    |
| ENSMUSG0000000039544 | Tc38     | -0.424219144 | 0.002128791 | ENSMUSG0000000035413 | Tmem68   | 0.514605082  | 0.000148222 | ENSMUSG000000022209  | Ppp4a         | -0.390431043 | 1.72E-14             | Zfp442               | 0.424374658 | 4.70E-08    |             |
| ENSMUSG0000000038089 | Cnaq22   | -0.423957398 | 0.000142323 | ENSMUSG0000000050777 | Tmem3    | 0.514440128  | 2.07E-24    | ENSMUSG000000078485  | Plknh1n       | -0.389743373 | 0.00198114           | ENSMUSG000000068267  | C2c0b       | 0.423889143 | 0.013102438 |
| ENSMUSG000000003365  | Cib1     | -0.42384852  | 0.02681078  | ENSMUSG000000027508  | Pag1     | 0.51274911   | 0.009055765 | ENSMUSG000000027679  | Dnag19        | -0.389669005 | 6.24E-07             | ENSMUSG0000000032403 | P3c0p0a0A05 | 0.423819114 | 0.001737784 |
| ENSMUSG0000000033565 | Rbf2c    | -0.423613712 | 0.002194184 | ENSMUSG000000005836  | Gata6    | 0.512573578  | 6.02E-07    | ENSMUSG0000000025194 | Abc2          | -0.389467445 | 2.77E-11             | ENSMUSG0000000031286 | Ectf2d42    | 0.423259843 | 0.002832508 |
| ENSMUSG0000000026738 | Pds1     | -0.423116351 | 1.09E-05    | ENSMUSG0000000052560 | Cpna8    | 0.512372819  | 7.88E-09    | ENSMUSG0000000049045 | Rbc2          | -0.389342280 | 2.81E-26             | ENSMUSG0000000028356 | Ampb        | 0.422321786 | 9.96E-11    |
| ENSMUSG0000000027828 | Sr3      | -0.422116263 | 0.000623364 | ENSMUSG0000000033355 | Rap2a    | 0.511908836  | 7.75E-10    | ENSMUSG0000000002899 | Amp2          | -0.389176166 | 0.005762682          | ENSMUSG000000004997  | Prd3        | 0.422205093 | 7.89E-06    |
| ENSMUSG0000000026738 | Sic15a13 | -0.421915605 | 1.79E-19    | ENSMUSG0000000051615 | Rap2a    | 0.511505251  | 3.12E-17    | ENSMUSG000000078022  | 9130024F11    | -0.389026848 | 8.21E-05             | ENSMUSG0000000039262 | Pmc2b       | 0.42212106  | 0.002106378 |
| ENSMUSG0000000026049 | Tex30    | -0.421427095 | 0.02925646  | ENSMUSG0000000028173 | Wls      | 0.511478435  | 4.18E-05    | ENSMUSG0000000020826 | Nox2          | -0.388871612 | 2.90E-29             | ENSMUSG0000000033065 | Pkm         | 0.422039682 | 0.01097754  |
| ENSMUSG0000000027195 | Hdb17b12 | -0.42115593  | 0.001033397 | ENSMUSG0000000044352 | Sowaha   | 0.511429933  | 1.27E-23    | ENSMUSG0000000015083 | C8g           | -0.388801987 | 2.96E-09             | ENSMUSG0000000023960 | Enp5        | 0.419857539 | 3.10E-06    |
| ENSMUSG0000000038229 | Cad1     | -0.421117419 | 8.26E-07    | ENSMUSG0000000035437 | Rabgyp1  | 0.510877794  | 0.00412556  | ENSMUSG000000001378  | Abcd1         | -0.387518069 | 0.005392166          | ENSMUSG000000068141  | Gmt0232     | 0.41976111  | 0.031417028 |
| ENSMUSG0000000026738 | Muc13    | -0.4209403   | 0.032202419 | ENSMUSG0000000018501 | Ncor1    | 0.510772512  | 0.013862877 | Pp2r2c               | -0.3874728647 | 0.035676384  | Hectd4               | 0.41963286           | 0.001728334 |             |             |
| ENSMUSG0000000028656 | Cap1     | -0.420234968 | 0.000212026 | ENSMUSG000000010609  | Psm2     | 0.509187033  | 0.02359653  | ENSMUSG000000029445  | Hd6           | -0.386487779 | 0.004551515          | ENSMUSG000000070713  | Hmg2s-ps    | 0.418985038 | 0.037299163 |
| ENSMUSG0000000026738 | Gmf6     | -0.420074477 | 7.46E-06    | ENSMUSG000000015846  | Rra      | 0.509058173  | 3.26E-09    | ENSMUSG000000025409  | Mpb           | -0.385990824 | 0.000232359          | ENSMUSG0000000038305 | Spms21      | 0.418053805 | 0.003744916 |
| ENSMUSG0000000049832 | H2ax     | -0.419938437 | 0.02594076  | ENSMUSG000000031447  | Lamp1    | 0.508639365  | 9.09E-11    | ENSMUSG0000000058290 | Exp1          | -0.385804071 | 0.010685262          | ENSMUSG000000040479  | Dgkz        | 0.417938714 | 1.12E-09    |
| ENSMUSG0000000026738 | Kr18     | -0.419783416 | 3.96E-15    | ENSMUSG0000000028799 | Zfp362   | 0.508521336  | 0.026659318 | ENSMUSG000000033386  | Fms1          | -0.385211302 | 4.46E-34             | Rasa4                | 0.417792398 | 0.030199975 |             |
| ENSMUSG0000000024132 | Sic35b3  | -0.419772277 | 0.018903441 | ENSMUSG0000000054723 | Vmac     | 0.507192666  | 0.03123731  | Ptfr                 | -0.385105356  | 1.92E-13     | ENSMUSG000000078185  | Acml                 | 0.416764688 | 0.005058815 |             |
| ENSMUSG0000000016319 | Sic25a5  | -0.418927945 | 2.44E-08    | ENSMUSG0000000022614 | Lmf2     | 0.507014039  | 0.017029317 | ENSMUSG000000027781  | Cdb1          | -0.384419074 | 2.73E-10             | ENSMUSG000000029482  | Chci        | 0.416696581 | 1.03E-11    |
| ENSMUSG0000000030559 | Oma1     | -0.418457404 | 0.000595843 | ENSMUSG0000000028532 | Cachd1   | 0.506484928  | 9.23E-17    | ENSMUSG000000021906  | Abcd1         | -0.384216717 | 2.27E-13             | ENSMUSG000000009376  | Met         | 0.416443377 | 0.021765742 |
| ENSMUSG00000000      |          |              |             |                      |          |              |             |                      |               |              |                      |                      |             |             |             |

|                      |            |               |              |
|----------------------|------------|---------------|--------------|
| ENSMUSG00000024313   | Mep1b      | -0.390680986  | 0.0048394    |
| ENSMUSG00000026319   | Relch      | -0.390409195  | 0.048517154  |
| ENSMUSG000000042195  | Sic35f2    | -0.390320397  | 0.002738082  |
| ENSMUSG000000113769  | S033406009 | -0.390220275  | 1.84E-10     |
| ENSMUSG00000004844   | Bex4       | -0.389992179  | 2.25E-26     |
| ENSMUSG000000029474  | Rnf3f4     | -0.38978548   | 0.00029098   |
| ENSMUSG000000027592  | Manf       | -0.388912663  | 0.002993244  |
| ENSMUSG000000032589  | Bsn        | -0.38871653   | 6.60E-05     |
| ENSMUSG000000023792  | Vars2      | -0.388209639  | 0.0402993    |
| ENSMUSG000000039670  | Oxd1       | -0.388171959  | 0.00144598   |
| ENSMUSG000000002434  | Fam118a    | -0.388115622  | 2.86E-05     |
| ENSMUSG000000030662  | Rpn1       | -0.387696233  | 3.45E-05     |
| ENSMUSG000000006099  | Cdc42      | -0.387391729  | 5.13E-07     |
| ENSMUSG000000030717  | Nupr1      | -0.38688935   | 3.31E-34     |
| ENSMUSG000000028312  | Smc2       | -0.38584498   | 8.11E-05     |
| ENSMUSG000000020349  | Earg2      | -0.385789601  | 6.34E-34     |
| ENSMUSG000000004064  | Pnp1t      | -0.3854852    | 0.002881478  |
| ENSMUSG000000028312  | Itpri2     | -0.385403253  | 0.00267969   |
| ENSMUSG000000026014  | Raph1      | -0.384839596  | 4.70E-14     |
| ENSMUSG000000002881  | Nab1       | -0.383265618  | 0.00568452   |
| ENSMUSG00000000541   | Fam83e     | -0.383070063  | 1.16E-28     |
| ENSMUSG000000009479  | Pla2g2     | -0.382004081  | 0.01057116   |
| ENSMUSG000000118894  | Gm2424     | -0.3819094149 | 0.019326822  |
| ENSMUSG000000064181  | Rab3ip     | -0.381791913  | 1.78E-07     |
| ENSMUSG000000039129  | Poli2m     | -0.381711891  | 0.009282081  |
| ENSMUSG000000023939  | Mpr14      | -0.381092459  | 0.000141232  |
| ENSMUSG000000005930  | Gramd4     | -0.380592949  | 0.007531454  |
| ENSMUSG000000042225  | Ammecr1    | -0.380082439  | 3.62E-07     |
| ENSMUSG0000000041272 | Toc        | -0.379456066  | 6.94E-06     |
| ENSMUSG000000035775  | Krr2b      | -0.379232564  | 0.00244176   |
| ENSMUSG000000006388  | Ruvb1b     | -0.3788698    | 0.0049095291 |
| ENSMUSG000000031156  | Sic35a2    | -0.378467354  | 3.55E-08     |
| ENSMUSG000000024590  | Lmm1b      | -0.378416464  | 2.50E-20     |
| ENSMUSG000000002357  | Dgla       | -0.37768828   | 3.59E-11     |
| ENSMUSG000000118038  | Gm95e5     | -0.377417445  | 0.000477759  |
| ENSMUSG000000010406  | Mpr52      | -0.376989702  | 1.53E-07     |
| ENSMUSG000000004633  | Cmc2       | -0.37539048   | 0.003539428  |
| ENSMUSG000000002488  | Tiam1      | -0.374169828  | 0.00032707   |
| ENSMUSG000000004272  | Sestd1     | -0.37387873   | 0.00143347   |
| ENSMUSG000000021832  | Psmc6      | -0.373202108  | 0.00416813   |
| ENSMUSG000000036513  | Comm2d     | -0.37297022   | 5.09E-06     |
| ENSMUSG000000038209  | Itin1      | -0.372905418  | 4.92E-08     |
| ENSMUSG000000034789  | Rab24      | -0.372836768  | 0.020679189  |
| ENSMUSG000000019818  | Cd16a      | -0.372356618  | 6.04E-10     |
| ENSMUSG000000030160  | Det1       | -0.372139635  | 0.001473462  |
| ENSMUSG000000038332  | Sesn1      | -0.370814492  | 0.0388658    |
| ENSMUSG000000006786  | Bnip3      | -0.370056233  | 0.000462906  |
| ENSMUSG00000002018   | Snrfp      | -0.36997036   | 0.01868448   |
| ENSMUSG000000026222  | Sp100      | -0.369747929  | 1.30E-17     |
| ENSMUSG000000019432  | Cdr3b9     | -0.369687739  | 0.000785021  |
| ENSMUSG00000002178   | Pdhb       | -0.368855273  | 8.52E-11     |
| ENSMUSG000000018965  | Ywhah      | -0.368567464  | 0.040353225  |
| ENSMUSG000000023098  | Pomyt1     | -0.368551832  | 0.001111932  |
| ENSMUSG000000067219  | Nipal1     | -0.368128431  | 4.62E-13     |
| ENSMUSG000000020208  | Defa17     | -0.367777917  | 0.035080957  |
| ENSMUSG000000030389  | Sic11a3    | -0.36732935   | 1.41E-14     |
| ENSMUSG000000020183  | Ero1a      | -0.367140836  | 0.009410071  |
| ENSMUSG000000031429  | Psmc10     | -0.367037989  | 0.000141304  |
| ENSMUSG000000023886  | Smoc2      | -0.366852165  | 0.009580071  |
| ENSMUSG000000033998  | Kcnk1      | -0.366823184  | 2.43E-11     |
| ENSMUSG000000004880  | Lkr        | -0.366623894  | 0.00026446   |
| ENSMUSG000000068011  | Mkm2os     | -0.366240040  | 0.00103785   |
| ENSMUSG000000031781  | Tear1      | -0.36622276   | 0.002840411  |
| ENSMUSG000000050491  | 11m003717f | -0.365858151  | 5.97E-06     |
| ENSMUSG000000050401  | T8002      | -0.365648565  | 0.00107871   |
| ENSMUSG000000051413  | Pla2g2     | -0.365546664  | 0.049406237  |
| ENSMUSG000000020476  | Dnrl       | -0.365412724  | 9.13E-06     |
| ENSMUSG000000006621  | Sic5a6     | -0.365282989  | 2.09E-57     |
| ENSMUSG000000032814  | Sb3bgr12   | -0.365203108  | 8.66E-50     |
| ENSMUSG000000028693  | Nasp       | -0.364738867  | 0.000165444  |
| ENSMUSG00000002170   | Hmgcr      | -0.364516246  | 4.69E-10     |
| ENSMUSG000000022971  | Itnar2     | -0.364012198  | 0.000229603  |
| ENSMUSG000000026107  | Nabp1      | -0.363295301  | 0.000328748  |
| ENSMUSG000000023566  | Eay11      | -0.362780238  | 0.0367502    |
| ENSMUSG000000030814  | Pmp12      | -0.362521658  | 2.19E-13     |
| ENSMUSG000000020102  | Psmc3      | -0.362396009  | 0.026878155  |
| ENSMUSG000000035692  | Ig15       | -0.362319805  | 1.10E-14     |
| ENSMUSG000000024715  | Oatf1      | -0.362306594  | 0.036777447  |
| ENSMUSG000000025877  | Nudt5      | -0.362250412  | 0.001599213  |
| ENSMUSG000000033248  | Sic2a1     | -0.362140344  | 1.49E-09     |
| ENSMUSG000000039252  | Cep57      | -0.362025222  | 0.024589241  |
| ENSMUSG000000047205  | Dusp18     | -0.359652124  | 0.020172666  |
| ENSMUSG000000060267  | Impc2h     | -0.359340089  | 4.83E-08     |
| ENSMUSG00000003449   | Smc4       | -0.359326974  | 0.002717496  |
| ENSMUSG000000055681  | Cope       | -0.35888941   | 7.16E-06     |
| ENSMUSG000000075229  | Mlx23      | -0.358848202  | 1.70E-05     |
| ENSMUSG000000031163  | Glo5       | -0.358387644  | 4.42E-28     |
| ENSMUSG000000024712  | Rfk        | -0.35799643   | 0.00365595   |
| ENSMUSG000000113902  | Nudb1f     | -0.35772393   | 2.72E-06     |
| ENSMUSG000000039745  | Hatp2      | -0.357277545  | 2.23E-15     |
| ENSMUSG000000008708  | Serp1      | -0.356685403  | 0.000500317  |
| ENSMUSG000000114003  | Gm616      | -0.356418987  | 0.03757242   |
| ENSMUSG000000054693  | Adam10     | -0.356368973  | 4.66E-08     |
| ENSMUSG000000063953  | Amd2       | -0.355007038  | 0.001130369  |
| ENSMUSG000000032414  | Sar4       | -0.354841548  | 1.10E-05     |
| ENSMUSG000000028639  | Ybx1       | -0.354465475  | 0.00678661   |
| ENSMUSG000000039795  | Pap4       | -0.353902254  | 1.07E-24     |
| ENSMUSG000000004184  | Oatc       | -0.353509518  | 0.000103815  |
| ENSMUSG000000024795  | Klf20b     | -0.353195464  | 1.79E-06     |
| ENSMUSG000000044707  | Cnrlj      | -0.353194681  | 0.02839642   |
| ENSMUSG000000027395  | Poli1b     | -0.351845813  | 0.017297188  |
| ENSMUSG000000032398  | Sgnc2      | -0.351188732  | 0.021396842  |
| ENSMUSG000000040341  | Dac2       | -0.350234238  | 0.000569235  |
| ENSMUSG000000061111  | Mor1p      | -0.350178469  | 0.043204363  |
| ENSMUSG000000033200  | Tspg1      | -0.349542661  | 0.012744647  |
| ENSMUSG000000027286  | Lrc5f      | -0.349321846  | 6.92E-07     |
| ENSMUSG000000032046  | Ahd12      | -0.349302469  | 0.000536892  |
| ENSMUSG000000023805  | Sym2       | -0.349089938  | 0.00299517   |
| ENSMUSG000000065259  | Snor3a3    | -0.348382967  | 0.00712989   |
| ENSMUSG000000030382  | Ev3        | -0.348294178  | 0.004127172  |
| ENSMUSG000000021893  | Capn7      | -0.348251133  | 0.00032075   |
| ENSMUSG000000079253  | Khi9       | -0.347774373  | 7.14E-09     |
| ENSMUSG000000054625  | Cdc5c1     | -0.347733322  | 0.000657803  |
| ENSMUSG000000024486  | Hbfgf      | -0.347340574  | 0.004739645  |
| ENSMUSG000000010254  | Sgpp1      | -0.347067403  | 0.001245323  |
| ENSMUSG000000059734  | Nuaf8      | -0.347022685  | 1.56E-06     |
| ENSMUSG000000033946  | Mor3c      | -0.346885506  | 0.005520237  |
| ENSMUSG00000040170   | Fmo2       | -0.346744634  | 6.39E-09     |
| ENSMUSG000000030662  | Ipo5       | -0.346379338  | 1.80E-05     |
| ENSMUSG000000027108  | Ola1       | -0.346289067  | 0.036211525  |
| ENSMUSG000000014226  | Cyabcp     | -0.345953803  | 0.004743943  |
| ENSMUSG000000020245  | Bora8      | -0.345914476  | 0.022362873  |

|                       |            |             |              |
|-----------------------|------------|-------------|--------------|
| ENSMUSG000000001435   | Col18a1    | 0.476460479 | 0.00018191   |
| ENSMUSG000000039678   | Tbcl1d3    | 0.476302794 | 0.014029269  |
| ENSMUSG0000000021277  | Tra3f      | 0.475968682 | 0.019982045  |
| ENSMUSG000000021751   | Acoc2      | 0.475761686 | 0.01180493   |
| ENSMUSG0000000040740  | Sic25a34   | 0.475629644 | 0.0004114496 |
| ENSMUSG00000000505615 | Pylr1a     | 0.474855598 | 2.93E-15     |
| ENSMUSG0000000027272  | Pylr1      | 0.474524179 | 0.027019826  |
| ENSMUSG000000020868   | Ny1r2      | 0.474128817 | 0.001967403  |
| ENSMUSG0000000059409  | Pp2r5d     | 0.472686694 | 4.71E-08     |
| ENSMUSG000000026269   | Rnphep1    | 0.471781532 | 0.001623468  |
| ENSMUSG000000070574   | Z310016G11 | 0.471409989 | 0.028623321  |
| ENSMUSG000000021900   | Rtd        | 0.470971362 | 0.026165226  |
| ENSMUSG000000004846   | Plo3       | 0.470772362 | 0.003242197  |
| ENSMUSG000000039100   | March6     | 0.470561177 | 9.78E-07     |
| ENSMUSG0000000062624  | Cyp2c67    | 0.470296325 | 0.007954768  |
| ENSMUSG000000045055   | Abac5      | 0.469462689 | 9.88E-12     |
| ENSMUSG000000004826   | Dac2       | 0.469137077 | 0.006386617  |
| ENSMUSG000000034248   | Sic25a37   | 0.468716115 | 4.34E-13     |
| ENSMUSG0000000040814  | Ccl24      | 0.468522974 | 2.10E-31     |
| ENSMUSG0000000025571  | Tnfrcc6    | 0.468458657 | 7.22E-08     |
| ENSMUSG000000005621   | Zfp592     | 0.468320953 | 0.014355604  |
| ENSMUSG000000071855   | Cock12     | 0.467803735 | 0.012469257  |
| ENSMUSG0000000044042  | Fmm1       | 0.467433549 | 2.48E-05     |
| ENSMUSG000000020277   | Pkl        | 0.466631764 | 0.002140552  |
| ENSMUSG0000000033671  | Cep350     | 0.466524958 | 0.003242197  |
| ENSMUSG000000030747   | Dgr2       | 0.466449315 | 9.58E-07     |
| ENSMUSG0000000031706  | Rfx1       | 0.465964978 | 7.50E-07     |
| ENSMUSG000000070643   | Sox13      | 0.465013074 | 7.45E-15     |
| ENSMUSG0000000028464  | Tpm2       | 0.464214695 | 0.010603278  |
| ENSMUSG000000004396   | Sst        | 0.464077717 | 3.37E-45     |
| ENSMUSG00000000505142 | Man2b1     | 0.463891893 | 1.20E-05     |
| ENSMUSG000000029004   | Km2b2      | 0.463708812 | 1.76E-12     |
| ENSMUSG000000008575   | Nr1b       | 0.463345165 | 4.44E-06     |
| ENSMUSG000000039218   | Smm2       | 0.463168685 | 4.27E-09     |
| ENSMUSG000000031502   | Col4a1     | 0.462620797 | 0.007133387  |
| ENSMUSG000000001832   | Taf1c      | 0.462609122 | 0.012161377  |
| ENSMUSG000000053205   | Styx       | 0.462277777 | 0.031809287  |
| ENSMUSG000000070808   | Lgr5       | 0.460913886 | 9.18E-05     |
| ENSMUSG0000000020140  | Lgr5       | 0.459879904 | 1.22E-05     |
| ENSMUSG0000000060012  | Klf13b     | 0.459808079 | 0.034275001  |
| ENSMUSG000000037992   | Rara       | 0.459649613 | 0.002296802  |
| ENSMUSG000000022048   | Dpyr12     | 0.459503701 | 0.000855807  |
| ENSMUSG0000000023914  | Mep1a      | 0.459433537 | 9.65E-15     |
| ENSMUSG000000030629   | Zland6     | 0.45825131  | 1.58E-09     |
| ENSMUSG000000039782   | Cpeb2      | 0.457471898 | 0.016962224  |
| ENSMUSG000000028655   | Mfr2a      | 0.457322154 | 1.83E-15     |
| ENSMUSG0000000021127  | Zfp361     | 0.457298268 | 0.000231027  |
| ENSMUSG000000045886   | Pam16l     | 0.457147334 | 0.001267821  |
| ENSMUSG0000000017493  | Igfbp4     | 0.457056456 | 3.94E-05     |
| ENSMUSG000000028278   | Ragp       | 0.45687056  | 6.73E-17     |
| ENSMUSG000000046020   | Pofu1      | 0.455334235 | 0.0071348    |
| ENSMUSG0000000207546  | Atp9a      | 0.455245618 | 9.73E-07     |
| ENSMUSG000000071203   | Nap5       | 0.455105022 | 1.70E-29     |
| ENSMUSG000000047738   | Fndc10     | 0.454777737 | 6.37E-14     |
| ENSMUSG000000073889   | Il11ra1    | 0.454733062 | 0.016821364  |
| ENSMUSG000000019838   | Sic16a10   | 0.454548414 | 6.29E-06     |
| ENSMUSG0000000303178  | Kir3c      | 0.453800713 | 0.003092098  |
| ENSMUSG0000000207371  | Fah2a      | 0.453745722 | 1.46E-05     |
| ENSMUSG000000037098   | Rab11fip3  | 0.452890347 | 0.024589242  |
| ENSMUSG000000042535   | Gtbp1      | 0.452722786 | 0.000126167  |
| ENSMUSG0000000271188  | Pamr1      | 0.452160579 | 0.007556482  |
| ENSMUSG000000018334   | Ker1       | 0.452055985 | 0.000118806  |
| ENSMUSG000000028636   | Lpls       | 0.451451383 | 0.000706544  |
| ENSMUSG000000005469   | Lol1a      | 0.450813096 | 5.31E-06     |
| ENSMUSG000000040782   | Cop1       | 0.450517555 | 0.002716364  |
| ENSMUSG000000004071   | Cd1p1      | 0.450190952 | 8.22E-25     |
| ENSMUSG000000031996   | Ap1p2      | 0.449786349 | 0.001557951  |
| ENSMUSG000000038831   | Ralgps1    | 0.449639697 | 1.14E-09     |
| ENSMUSG000000022371   | Col14a1    | 0.448943763 | 6.10E-05     |
| ENSMUSG000000047710   | Champ1     | 0.44848667  | 0.000846162  |
| ENSMUSG000000021690   | Jmy1       | 0.448543706 | 0.000711404  |
| ENSMUSG000000035632   | Cntr3      | 0.448454586 | 0.00421991   |
| ENSMUSG000000021665   | Heab       | 0.448295052 | 0.000391653  |
| ENSMUSG0000000022479  | Mob3c      | 0.44806256  | 0.01260699   |
| ENSMUSG0000000022479  | Vdr        | 0.44767009  | 1.35E-10     |
| ENSMUSG000000042096   | Zfp800     | 0.447330739 | 4.44E-12     |
| ENSMUSG0000000050520  | Dio        | 0.448656349 | 2.37E-07     |
| ENSMUSG000000005886   | Deaf1      | 0.446667773 | 0.031279864  |
| ENSMUSG000000021417   | Eoc2       | 0.446320749 | 0.001703092  |
| ENSMUSG000000034453   | Pofr3b     | 0.445470151 | 0.030134072  |
| ENSMUSG000000003248   | Ubp1       | 0.445280118 | 1.56E-33     |
| ENSMUSG000000003248   | Sic25a36   | 0.445020799 | 5.73E-11     |
| ENSMUSG0000000040687  | Madd       | 0.444907956 | 0.000173235  |
| ENSMUSG0000000010045  | Tmmr115    | 0.443787369 | 0.048096086  |
| ENSMUSG0000000058672  | Tub2a2     | 0.443674662 | 1.24E-06     |
| ENSMUSG0000000033308  | Tacy2      | 0.443579039 | 3.75E-05     |
| ENSMUSG000000030852   | Dppc       | 0.44340345  | 2.63E-06     |
| ENSMUSG0000000076617  | Ighm       | 0.442738215 | 0.027831561  |
| ENSMUSG000000032083   | Apn1       | 0.442017598 | 2.28E-16     |
| ENSMUSG000000031983   | Dio1       | 0.441963515 | 0.017128529  |
| ENSMUSG0000000038914  | Xid2       | 0.441626175 | 0.000546262  |
| ENSMUSG0000000023019  | Gp1        | 0.441532628 | 1.67E-39     |
| ENSMUSG0000000038611  | Phr1       | 0.441498113 | 0.024130871  |
| ENSMUSG000000054199   | Gon4l      | 0.441145323 | 0.001940984  |
| ENSMUSG0000000028161  | Pp3cna     | 0.440558555 | 4.79E-12     |
| ENSMUSG0000000042372  | Zfp140     | 0.43951902  | 1.32E-07     |
| ENSMUSG0000000097222  | Gata6a5    | 0.439548804 | 0.001122192  |
| ENSMUSG0000000031451  | Gmb6       | 0.439319934 | 1.30E-11     |
| ENSMUSG0000000250241  | Lambt3     | 0.43926801  | 0.004776418  |
| ENSMUSG0000000029188  | Nf5c2      | 0.439251406 | 0.000105358  |
| ENSMUSG0000000024933  | Sic34a2    | 0.439206506 | 7.32E-69     |
| ENSMUSG0000000024933  | Prrc2a     | 0.438835342 | 3.79E-05     |
| ENSMUSG0000000024933  | Adtpa      | 0.438695729 | 3.49E-09     |
| ENSMUSG0000000068284  | Ust3       | 0.43825191  | 0.001926304  |
| ENSMUSG0000000069917  | Hba-a2     | 0.43777305  | 0.015987684  |
| ENSMUSG0000000038280  | Tmrx22     | 0.437572533 | 9.72E-21     |
| ENSMUSG0000000028977  | Fbxo42     | 0.437415406 | 0.007846587  |
| ENSMUSG0000000028977  | Cas21      | 0.43699108  | 1.14E-07     |
| ENSMUSG000000014426   | Mak34      | 0.435521502 | 0.026733247  |
| ENSMUSG000000075704   | Tmxr2      | 0.434916197 | 0.000632896  |
| ENSMUSG0000000024367  | Glnr3d     | 0.434270881 | 2.69E-25     |
| ENSMUSG0000000031968  | Ptdss1     | 0.433713329 | 3.80E-36     |
| ENSMUSG0000000049354  | Cnpy4      | 0.432799556 | 0.046330648  |
| ENSMUSG0000000042359  | Dyrb7      | 0.432562564 | 0.00128914   |
| ENSMUSG0000000035569  | Caag       | 0.431317151 | 0.001504114  |
| ENSMUSG000000047866   | Ons1b1     | 0.431275991 | 1.13E-10     |
| ENSMUSG000000045576   | Antp1      | 0.431200671 | 1.49E-10     |
| ENSMUSG000000037102   | Str2       | 0.430626952 | 4.54E-12     |
| ENSMUSG0000000034708  | Csa        | 0.430056304 | 0.005977927  |
| ENSMUSG000000037102   | Mmaa       | 0.429728957 | 3.43E-09     |

|                       |            |              |              |
|-----------------------|------------|--------------|--------------|
| ENSMUSG000000025144   | Cempx      | -0.345893955 | 6.34E-05     |
| ENSMUSG000000022680   | Atad2      | -0.345388925 | 0.000185654  |
| ENSMUSG000000016634   | Pps2-ps13  | -0.34530682  | 0.045982683  |
| ENSMUSG000000006973   | Hrmpc      | -0.344859995 | 0.000925451  |
| ENSMUSG000000008497   | Bbp1       | -0.344510942 | 0.000109372  |
| ENSMUSG000000007193   | PsmB4      | -0.344410703 | 0.000123042  |
| ENSMUSG000000009690   | Gmp350     | -0.343967722 | 0.002081337  |
| ENSMUSG000000002456   | Sdcbp2     | -0.343592405 | 1.54E-09     |
| ENSMUSG0000000040128  | Prrc1      | -0.343567481 | 6.22E-13     |
| ENSMUSG0000000055239  | Kcmf1      | -0.343425185 | 0.000156065  |
| ENSMUSG000000003274   | Me1aBa     | -0.34318369  | 2.18E-05     |
| ENSMUSG0000000070284  | Gmpb6      | -0.343117853 | 1.49E-09     |
| ENSMUSG0000000027384  | Ndrfafa5   | -0.343023932 | 3.50E-06     |
| ENSMUSG0000000032171  | Pin1       | -0.342750719 | 0.005636551  |
| ENSMUSG0000000020917  | Acly       | -0.342473402 | 3.92E-05     |
| ENSMUSG0000000033589  | Reep4      | -0.342260311 | 2.62E-10     |
| ENSMUSG0000000042253  | Dync2i1    | -0.341904214 | 0.015760246  |
| ENSMUSG0000000093930  | Hmgcs1     | -0.34184031  | 7.27E-14     |
| ENSMUSG000000004575   | Capzb      | -0.341637468 | 7.55E-10     |
| ENSMUSG000000003672   | Tmem258    | -0.340479002 | 0.015298986  |
| ENSMUSG000000003076   | Mpr4d8     | -0.340170071 | 1.96E-07     |
| ENSMUSG000000005956   | Fxb6       | -0.340092761 | 0.0002282951 |
| ENSMUSG000000120252   | Kp31504    | -0.338953233 | 0.000744549  |
| ENSMUSG0000000046598  | Bdh1       | -0.33819861  | 2.81E-16     |
| ENSMUSG0000000020459  | Mhr2       | -0.337713287 | 2.64E-06     |
| ENSMUSG0000000036532  | Hddc3      | -0.337706525 | 5.18E-15     |
| ENSMUSG0000000020878  | Krl2c      | -0.337617143 | 0.010798597  |
| ENSMUSG0000000071604  | Entp1      | -0.33761443  | 0.014991104  |
| ENSMUSG00000000721115 | Ang        | -0.337421743 | 3.86E-06     |
| ENSMUSG0000000032459  | Myps22     | -0.337053102 | 0.005762862  |
| ENSMUSG000000003573   | Syap1      | -0.336747603 | 0.000325163  |
| ENSMUSG0000000027397  | Ttrc       | -0.336570703 | 0.002726922  |
| ENSMUSG00000000312    | Edm2       | -0.33630552  | 0.004998049  |
| ENSMUSG0000000023631  | Cela1      | -0.335999656 | 3.10E-07     |
| ENSMUSG0000000020360  | Sppl2a     | -0.335688852 | 9.05E-07     |
| ENSMUSG0000000026879  | Gsn        | -0.335370748 | 1.35E-83     |
| ENSMUSG0000000035743  | Igsa2      | -0.334877728 | 2.91E-10     |
| ENSMUSG0000000004455  | Tmem242    | -0.334536014 | 1.68E-07     |
| ENSMUSG0000000016252  | Atp5f1     | -0.33376174  | 4.21E-13     |
| ENSMUSG0000000028889  | Yrdc       | -0.333111037 | 0.044645497  |
| ENSMUSG0000000031309  | Pps6ka3    | -0.332845157 | 8.17E-05     |
| ENSMUSG0000000032545  | Ercd4      | -0.332620761 | 0.000272817  |
| ENSMUSG0000000002423  | Oac1       | -0.33243443  | 1.98E-11     |
| ENSMUSG0000000020183  | Cpm        | -0.332193633 | 0.000506655  |
| ENSMUSG0000000045136  | Tubb2b     | -0.331930538 | 9.89E-13     |
| ENSMUSG0000000022014  | Epst1      | -0.331897722 | 4.91E-06     |
| ENSMUSG0000000023004  | Tuba1b     | -0.331430443 | 0.001240041  |
| ENSMUSG0000000032802  | Snn1       | -0.331411362 | 2.38E-09     |
| ENSMUSG0000000031753  | Pck1       | -0.331394289 | 1.48E-08     |
| ENSMUSG0000000042028  | Uqc2c      | -0.331214659 | 0.001008049  |
| ENSMUSG0000000020386  | Sar1b      | -0.330985971 | 2.47E-16     |
| ENSMUSG0000000032615  | N5m        | -0.33086972  | 0.001662336  |
| ENSMUSG00000000401120 | N1b        | -0.330614029 | 2.03E-79     |
| ENSMUSG0000000025513  | Mbd2       | -0.330206207 | 0.04496405   |
| ENSMUSG0000000059433  | Bsp7       | -0.330121849 | 0.01138942   |
| ENSMUSG0000000028431  | Cnkcr1     | -0.329456836 | 0.020355098  |
| ENSMUSG0000000012484  | Zawim7     | -0.329315639 | 8.84E-07     |
| ENSMUSG0000000019133  | Septin7    | -0.329314129 | 0.000649251  |
| ENSMUSG0000000019139  | Iygn1a     | -0.329146358 | 0.001226979  |
| ENSMUSG0000000016308  | Ube2a      | -0.329018775 | 0.012960757  |
| ENSMUSG0000000028986  | Rcc1       | -0.328873574 | 1.02E-06     |
| ENSMUSG0000000020519  | Gct1       | -0.328209393 | 1.79E-13     |
| ENSMUSG000000002325   | Itf1       | -0.327094716 | 8.62E-10     |
| ENSMUSG0000000000088  | Cox5a      | -0.326639438 | 2.56E-26     |
| ENSMUSG0000000043629  | 1700019D03 | -0.326614393 | 2.77E-18     |
| ENSMUSG0000000003361  | Sri        | -0.326474693 | 1.58E-09     |
| ENSMUSG0000000034556  | Nmnat3     | -0.325830742 | 4.39E-16     |
| ENSMUSG0000000023201  | PsmAa      | -0.325620558 | 0.000194134  |
| ENSMUSG0000000032734  | Rhgtt      | -0.32560423  | 0.003045526  |
| ENSMUSG000000001082   | Msfad10    | -0.325473637 | 1.77E-05     |
| ENSMUSG0000000019066  | Rab3d      | -0.325233939 | 3.02E-16     |
| ENSMUSG0000000026257  | Prelid3b   | -0.324889947 | 2.87E-08     |
| ENSMUSG0000000016838  | Htc        | -0.323588838 | 0.002094516  |
| ENSMUSG0000000029992  | Gltf1      | -0.323349502 | 1.28E-32     |
| ENSMUSG0000000074444  | Tnxd9      | -0.323243505 | 0.002717478  |
| ENSMUSG0000000013483  | Card14     | -0.323186834 | 0.006547487  |
| ENSMUSG0000000027810  | Elf2a      | -0.322814152 | 0.000599811  |
| ENSMUSG0000000031919  | Tmem1      | -0.322794985 | 0.001023102  |
| ENSMUSG0000000020778  | Ten1       | -0.322395045 | 0.008325527  |
| ENSMUSG0000000042605  | Sdhaf3     | -0.32199338  | 7.05E-08     |
| ENSMUSG0000000038507  | Gng10      | -0.321830898 | 0.003692373  |
| ENSMUSG0000000033792  | Atp7a      | -0.321167137 | 0.000127399  |
| ENSMUSG0000000040460  | Dnab11     | -0.320967123 | 0.017673494  |
| ENSMUSG0000000032519  | Slc25a38   | -0.320639731 | 0.001982136  |
| ENSMUSG00000000004849 | Apt1a1     | -0.320235361 | 0.000117374  |
| ENSMUSG0000000030770  | Parva      | -0.320196047 | 0.000258828  |
| ENSMUSG0000000074444  | Deaf3      | -0.319287946 | 1.70E-05     |
| ENSMUSG0000000010757  | It3ra1     | -0.31920785  | 9.51E-06     |
| ENSMUSG0000000032172  | Ticd2      | -0.319074237 | 1.54E-11     |
| ENSMUSG00000000301353 | Rbbp7      | -0.319038275 | 0.010770722  |
| ENSMUSG0000000011958  | Bnip2      | -0.318787241 | 0.021077511  |
| ENSMUSG0000000035704  | Alg8       | -0.318458363 | 0.007777556  |
| ENSMUSG0000000031609  | Sap30      | -0.317980206 | 0.027859551  |
| ENSMUSG0000000039285  | Azi2       | -0.317894047 | 0.002357239  |
| ENSMUSG0000000019173  | Rab5c      | -0.317893207 | 3.24E-08     |
| ENSMUSG0000000021216  | Tuba3      | -0.317090613 | 8.18E-05     |
| ENSMUSG0000000025075  | Habp2      | -0.316775308 | 6.03E-07     |
| ENSMUSG0000000030298  | Sect3      | -0.316209054 | 3.63E-14     |
| ENSMUSG00000000401301 | Ctrf       | -0.316149569 | 2.76E-11     |
| ENSMUSG0000000044533  | Rps2       | -0.316110776 | 0.03135496   |
| ENSMUSG000000003221   | Gmpa4      | -0.316071633 | 0.021765742  |
| ENSMUSG0000000022571  | Pyclr1     | -0.316036034 | 8.09E-11     |
| ENSMUSG0000000040174  | Alpkb3     | -0.315751871 | 2.7E-05      |
| ENSMUSG0000000040460  | C1ga1f1    | -0.315748569 | 0.00166571   |
| ENSMUSG0000000056394  | Lig1       | -0.315564547 | 1.69E-08     |
| ENSMUSG0000000037685  | Atp8a1     | -0.315332501 | 0.003905009  |
| ENSMUSG0000000030647  | Ndrf2c     | -0.315250178 | 4.7E-12      |
| ENSMUSG0000000022706  | Mpr40      | -0.315109991 | 0.04683664   |
| ENSMUSG000000003946   | Ncapb      | -0.314399273 | 0.021436874  |
| ENSMUSG0000000079685  | Ubp1       | -0.314074024 | 0.006403868  |
| ENSMUSG000000003930   | Ppp2cb     | -0.314005944 | 0.012888866  |
| ENSMUSG000000002591   | Glxr       | -0.313287633 | 0.025919558  |
| ENSMUSG0000000029221  | Slc30a9    | -0.313153639 | 0.000841206  |
| ENSMUSG0000000013822  | Elof1      | -0.312909344 | 1.65E-05     |
| ENSMUSG0000000030770  | Rtorm1     | -0.312444731 | 0.011726217  |
| ENSMUSG000000002869   | Cdk5       | -0.312167919 | 0.000199372  |
| ENSMUSG0000000040455  | Rps14      | -0.311968732 | 0.001949464  |
| ENSMUSG0000000028409  | Smu1       | -0.31186559  | 0.001324359  |
| ENSMUSG000000004455   | Upd45      | -0.311693734 | 0.048517154  |
| ENSMUSG000000002181   | Cab39      | -0.311107    | 0.000675762  |
| ENSMUSG0000000020956  | Dtd2       | -0.310878391 | 0.01591586   |
| ENSMUSG0000000040631  | Dok4       | -0.310683944 | 2.17E-13     |

|                       |          |              |             |
|-----------------------|----------|--------------|-------------|
| ENSMUSG0000000036698  | Agol2    | 0.429261959  | 7.62E-09    |
| ENSMUSG0000000035247  | Hedc11   | 0.429102266  | 7.87E-16    |
| ENSMUSG0000000018376  | Gmp92b   | 0.428722708  | 0.00287052  |
| ENSMUSG0000000030126  | Tmcc1    | 0.428633725  | 0.039558338 |
| ENSMUSG0000000039765  | Ccd2a2a  | 0.428518562  | 8.9E-07     |
| ENSMUSG0000000049800  | Sertad2  | 0.428411335  | 0.005395397 |
| ENSMUSG0000000026074  | Map4k4   | 0.427722725  | 6.07E-07    |
| ENSMUSG0000000024169  | Itt140   | 0.426873426  | 0.026686387 |
| ENSMUSG0000000058325  | Dock1    | 0.426807211  | 1.28E-10    |
| ENSMUSG0000000001164  | Zmr2     | 0.426543633  | 1.01E-05    |
| ENSMUSG00000000114358 | Gms200   | 0.426541381  | 6.33E-07    |
| ENSMUSG0000000022235  | Cmb1     | 0.426194637  | 1.78E-05    |
| ENSMUSG0000000040481  | Bpff     | 0.426060321  | 1.82E-14    |
| ENSMUSG0000000024463  | Slc52a3  | 0.425613482  | 9.68E-133   |
| ENSMUSG000000001895   | Wipi1    | 0.425144456  | 0.007467407 |
| ENSMUSG0000000050711  | Scg2     | 0.4250182    | 0.005961378 |
| ENSMUSG0000000045005  | Fzd5     | 0.424580845  | 8.16E-18    |
| ENSMUSG0000000055013  | Agap1    | 0.423745251  | 7.16E-09    |
| ENSMUSG0000000020198  | Ap3d1    | 0.423433003  | 2.11E-07    |
| ENSMUSG0000000034218  | Alt      | 0.423175538  | 0.000478012 |
| ENSMUSG0000000009681  | Bcr      | 0.422955002  | 0.00167826  |
| ENSMUSG000000003154   | Foxj2    | 0.422597415  | 0.009317429 |
| ENSMUSG0000000045664  | Cdc42ap2 | 0.422370075  | 0.00461029  |
| ENSMUSG0000000029173  | Seppscs  | 0.422287494  | 0.001539384 |
| ENSMUSG000000004298   | Zfp761   | 0.422239043  | 0.005817429 |
| ENSMUSG0000000047371  | Zfp768   | 0.422043972  | 0.00289207  |
| ENSMUSG0000000047888  | Tnrcb0b  | 0.421823691  | 0.003025508 |
| ENSMUSG0000000041702  | Btdb7    | 0.421614571  | 0.00030282  |
| ENSMUSG0000000021375  | Kir13a   | 0.421475151  | 8.53E-14    |
| ENSMUSG0000000038658  | Ric1     | 0.420387312  | 0.035084930 |
| ENSMUSG0000000034994  | Ezf2     | 0.419630146  | 1.56E-19    |
| ENSMUSG0000000045095  | Nedk4l   | 0.419477556  | 1.58E-10    |
| ENSMUSG0000000064442  | Gm6225   | 0.418556299  | 0.02993438  |
| ENSMUSG000000004465   | Phip1b   | 0.418523382  | 0.000149937 |
| ENSMUSG0000000032114  | Slc37a4  | 0.417769854  | 2.10E-85    |
| ENSMUSG0000000057134  | Ado      | 0.417462302  | 2.38E-05    |
| ENSMUSG0000000022565  | Plec     | 0.417400485  | 2.45E-12    |
| ENSMUSG0000000045038  | Kirac    | 0.417313922  | 1.12E-09    |
| ENSMUSG0000000021392  | No1      | 0.417313546  | 0.044533113 |
| ENSMUSG0000000028465  | Tnfr8    | 0.417127864  | 0.001996499 |
| ENSMUSG0000000021974  | Fgf9     | 0.416702504  | 0.000578396 |
| ENSMUSG0000000042390  | Gatad2b  | 0.415851713  | 1.79E-05    |
| ENSMUSG0000000041831  | Syt13    | 0.415557248  | 0.037730409 |
| ENSMUSG0000000051003  | Agmo     | 0.415235348  | 8.23E-09    |
| ENSMUSG0000000054321  | Taf4b    | 0.41452159   | 0.001361867 |
| ENSMUSG0000000037499  | Nenf     | 0.414462884  | 9.02E-17    |
| ENSMUSG0000000028992  | Nmnat1   | 0.414277313  | 8.29E-16    |
| ENSMUSG0000000020638  | Cmpk2    | 0.413662774  | 1.79E-17    |
| ENSMUSG0000000025856  | Pdgfra   | 0.413565362  | 0.018492819 |
| ENSMUSG0000000039477  | Tnrc18   | 0.413313749  | 1.74E-07    |
| ENSMUSG0000000018412  | Kana1    | 0.412893414  | 0.011096963 |
| ENSMUSG0000000025609  | Mkin1    | 0.412728831  | 4.78E-06    |
| ENSMUSG0000000020137  | Thap2    | 0.412224216  | 0.010815207 |
| ENSMUSG0000000032224  | Serping1 | 0.412084429  | 0.025814206 |
| ENSMUSG0000000019854  | Reps1    | 0.411777469  | 1.21E-05    |
| ENSMUSG000000003155   | Mgat5    | 0.411739944  | 0.001437345 |
| ENSMUSG0000000034889  | Cactin   | 0.411557557  | 0.000970805 |
| ENSMUSG0000000036281  | Snaptol  | 0.411556521  | 0.024274076 |
| ENSMUSG0000000066621  | Tecp1    | 0.411111355  | 0.000741664 |
| ENSMUSG0000000040007  | Bahd1    | 0.410556673  | 9.63E-06    |
| ENSMUSG0000000018401  | Mmrn4    | 0.410422819  | 0.04399098  |
| ENSMUSG0000000015839  | Nfe2l2   | 0.410365302  | 9.51E-79    |
| ENSMUSG0000000034659  | Tmem109  | 0.410348971  | 0.001937543 |
| ENSMUSG0000000050592  | Fam78a   | 0.410132131  | 0.01881599  |
| ENSMUSG0000000040703  | Cyp2c1   | 0.409642599  | 3.23E-05    |
| ENSMUSG0000000031149  | Praf2    | 0.409571606  | 4.57E-05    |
| ENSMUSG0000000026547  | Tagln2   | 0.408818684  | 0.001404727 |
| ENSMUSG0000000039414  | Hesr5b   | 0.406974074  | 0.010704331 |
| ENSMUSG0000000034269  | Setd5    | 0.406858441  | 0.000421334 |
| ENSMUSG0000000043154  | Ppp2r3a  | 0.4068001238 | 4.62E-11    |
| ENSMUSG0000000036918  | Tc7      | 0.405483915  | 0.009317429 |
| ENSMUSG0000000025225  | Nfb2     | 0.404793728  | 1.50E-06    |
| ENSMUSG0000000029684  | Wsl      | 0.404633351  | 2.74E-32    |
| ENSMUSG0000000039529  | Atbpb1   | 0.403412295  | 6.53E-23    |
| ENSMUSG0000000021065  | Fut8     | 0.403344563  | 3.85E-06    |
| ENSMUSG0000000031908  | Sid2     | 0.402995082  | 0.00337762  |
| ENSMUSG0000000037791  | Phf12    | 0.402428789  | 0.00027862  |
| ENSMUSG0000000043465  | Cxcl2    | 0.402427667  | 3.04E-06    |
| ENSMUSG0000000018707  | Dync1h1  | 0.402288164  | 8.90E-05    |
| ENSMUSG0000000034371  | Ttnc1    | 0.402137748  | 1.29E-93    |
| ENSMUSG0000000052534  | Pbx1     | 0.40211681   | 9.62E-20    |
| ENSMUSG0000000066894  | Vsig10   | 0.401952135  | 1.09E-19    |
| ENSMUSG0000000040498  | Igfbp3   | 0.401937831  | 1.20E-11    |
| ENSMUSG0000000050271  | Prag1    | 0.401726377  | 0.00897427  |
| ENSMUSG0000000052520  | Oga      | 0.401523096  | 0.001393573 |
| ENSMUSG0000000045248  | Med26    | 0.401469618  | 0.001393573 |
| ENSMUSG0000000030230  | Rag1     | 0.401304757  | 2.29E-06    |
| ENSMUSG0000000055628  | Tmod4    | 0.400388076  | 0.002974201 |
| ENSMUSG0000000025792  | Slc25a10 | 0.400211246  | 0.00745477  |
| ENSMUSG0000000015806  | Qpdr     | 0.400170988  | 2.46E-06    |
| ENSMUSG0000000026827  | Gd2      | 0.400161941  | 1.82E-15    |
| ENSMUSG0000000037600  | Kdrl     | 0.399753053  | 0.01063215  |
| ENSMUSG0000000039488  | Mmd      | 0.399720201  | 0.00041474  |
| ENSMUSG0000000095983  | H3p2     | 0.399623449  | 0.02340887  |
| ENSMUSG0000000010277  | Bt3a     | 0.399612551  | 0.032758501 |
| ENSMUSG0000000033466  | Abhd17a  | 0.399271135  | 5.08E-06    |
| ENSMUSG0000000045410  | Akr1e1   | 0.399170545  | 0.08E-08    |
| ENSMUSG0000000008348  | Lir3     | 0.398972918  | 0.00708425  |
| ENSMUSG0000000025486  | Ubc      | 0.398760471  | 5.08E-07    |
| ENSMUSG0000000005564  | Mfsd5    | 0.398397373  | 0.02362331  |
| ENSMUSG0000000066638  | Abhd1    | 0.397975485  | 4.24E-24    |
| ENSMUSG0000000006716  | Plknh1   | 0.397558769  | 0.01123877  |
| ENSMUSG0000000031540  | Kat5a    | 0.396907329  | 0.000657803 |
| ENSMUSG0000000001370  | Tfribp2  | 0.396647835  | 6.78E-06    |
| ENSMUSG0000000037270  | Btp1     | 0.394988247  | 0.00446374  |
| ENSMUSG0000000028519  | Dab1     | 0.394890735  | 0.010826073 |
| ENSMUSG0000000029630  | Cyp3a25  | 0.39420599   | 9.42E-59    |
| ENSMUSG0000000049339  | Retreg2  | 0.39390089   | 0.00746680  |
| ENSMUSG0000000029291  | Rufy3    | 0.393868372  | 0.0230861   |
| ENSMUSG0000000034485  | Uaca     | 0.393827965  | 2.00E-134   |
| ENSMUSG0000000020821  | Kif1c    | 0.393423185  | 3.89E-12    |
| ENSMUSG00000000207428 | Rbbp9    | 0.393361477  | 0.035622    |
| ENSMUSG0000000025798  | Atp3     | 0.393111878  | 3.07E-08    |
| ENSMUSG0000000025336  | Cod2     | 0.39159204   | 0.00540853  |
| ENSMUSG0000000025396  | Hdtb7    | 0.391466825  | 8.79E-56    |
| ENSMUSG0000000025481  | Mtar2    | 0.391426998  | 9.37E-163   |
| ENSMUSG0000000028003  | Lrat     | 0.391166437  | 1.52E-29    |
| ENSMUSG00000000071604 | Zfp827   | 0.391105477  | 9.83E-05    |

|                      |            |              |             |
|----------------------|------------|--------------|-------------|
| ENSMUSG00000042507   | Midea      | -0.310762682 | 0.011009046 |
| ENSMUSG00000005323   | Nduraf6    | -0.310537296 | 0.013421324 |
| ENSMUSG00000004691   | Famr11a    | -0.310094593 | 0.4561307   |
| ENSMUSG00000003198   | 4931406C07 | -0.308337862 | 1.37E-14    |
| ENSMUSG00000002017   | Hal        | -0.308062984 | 5.11E-05    |
| ENSMUSG000000040659  | Efh2d      | -0.307487694 | 5.00E-22    |
| ENSMUSG00000002317   | Fkbp2      | -0.306635534 | 0.010618603 |
| ENSMUSG000000096255  | Dynr11b    | -0.305844063 | 0.000234715 |
| ENSMUSG00000002552   | E2f5       | -0.305762257 | 5.30E-06    |
| ENSMUSG00000002752   | Egfr1      | -0.305454936 | 0.014233943 |
| ENSMUSG00000002143   | B4gq1a     | -0.305447328 | 4.08E-16    |
| ENSMUSG000000027551  | Zfp64      | -0.305444552 | 0.000947073 |
| ENSMUSG000000039737  | Prkpr1     | -0.305405292 | 0.000281226 |
| ENSMUSG000000015671  | Psm2a      | -0.305002828 | 0.01229255  |
| ENSMUSG0000000031799 | Tpm4       | -0.304389664 | 0.006838564 |
| ENSMUSG000000042029  | Ncapg2     | -0.304305085 | 0.038920372 |
| ENSMUSG000000030121  | Coxb7      | -0.304145782 | 3.74E-11    |
| ENSMUSG000000003858  | Cmpk1      | -0.304142608 | 7.37E-06    |
| ENSMUSG000000005362  | Crbn       | -0.304016960 | 0.015600001 |
| ENSMUSG000000000457  | Cd44       | -0.3039344   | 0.001807316 |
| ENSMUSG000000001058  | Syk        | -0.303729992 | 0.000505261 |
| ENSMUSG000000001666  | Dad        | -0.303634494 | 5.88E-08    |
| ENSMUSG000000057649  | Brd9       | -0.303522884 | 0.00010538  |
| ENSMUSG000000070777  | Cecacm20   | -0.30328878  | 5.61E-11    |
| ENSMUSG000000003858  | Famr204a   | -0.303236518 | 4.73E-06    |
| ENSMUSG000000004340  | Btnr2      | -0.302858519 | 0.003955955 |
| ENSMUSG000000002433  | Fgfbp1     | -0.302775142 | 7.61E-25    |
| ENSMUSG000000010114  | Ndurf6     | -0.302578004 | 1.88E-09    |
| ENSMUSG000000030454  | Msfad12    | -0.30235202  | 0.024100058 |
| ENSMUSG000000045838  | Cdc9b      | -0.302096062 | 0.03692031  |
| ENSMUSG000000003291  | Tmrn30a    | -0.30195098  | 9.79E-09    |
| ENSMUSG000000003812  | Tmt11      | -0.301705752 | 0.00017618  |
| ENSMUSG000000000000  | Thes13     | -0.301699963 | 7.82E-05    |
| ENSMUSG000000003039  | Ap1m2      | -0.30160309  | 0.000509864 |
| ENSMUSG000000003559  | Mpr17i2    | -0.30073985  | 0.000814668 |
| ENSMUSG000000028037  | Ifi44      | -0.299882786 | 0.001720794 |
| ENSMUSG000000003518  | Bbln       | -0.299868457 | 0.001189736 |
| ENSMUSG0000000029513 | Pkaiab1    | -0.299278376 | 9.09E-20    |
| ENSMUSG000000003245  | Cin6       | -0.299227422 | 0.000303194 |
| ENSMUSG000000026558  | Ucl        | -0.299172128 | 4.94E-06    |
| ENSMUSG000000002030  | Ube2b      | -0.298912721 | 1.69E-08    |
| ENSMUSG00000002357   | Cris1      | -0.298889676 | 0.044354991 |
| ENSMUSG000000003858  | Jaric2     | -0.298838904 | 5.91E-05    |
| ENSMUSG0000000063524 | Enc1       | -0.298755653 | 3.75E-15    |
| ENSMUSG000000003245  | Mesd       | -0.298511876 | 0.023590132 |
| ENSMUSG000000014559  | E2f4       | -0.298407176 | 0.000728529 |
| ENSMUSG000000024856  | Me2        | -0.297687052 | 2.55E-11    |
| ENSMUSG000000006050  | Sra1       | -0.297370615 | 1.26E-10    |
| ENSMUSG000000004685  | Fbl        | -0.29710548  | 0.025541177 |
| ENSMUSG000000017713  | Tha1       | -0.296554217 | 0.000598829 |
| ENSMUSG000000003245  | Selk       | -0.296523896 | 0.020343029 |
| ENSMUSG000000003126  | Hmb5       | -0.296479942 | 0.031491493 |
| ENSMUSG000000002579  | Msfad1     | -0.296372724 | 0.02769699  |
| ENSMUSG000000005616  | H12-T22    | -0.29627461  | 0.009413467 |
| ENSMUSG000000007502  | Selenom    | -0.296146437 | 0.017645423 |
| ENSMUSG000000006880  | Ap2m1      | -0.295938659 | 4.14E-06    |
| ENSMUSG000000002241  | Apz2m1     | -0.295336966 | 0.000975717 |
| ENSMUSG000000004820  | Cracr2b    | -0.295254803 | 0.007127017 |
| ENSMUSG000000059235  | Hoxp       | -0.295212738 | 7.52E-12    |
| ENSMUSG000000006362  | P3s1-ps1   | -0.294622675 | 1.86E-05    |
| ENSMUSG000000005729  | Lm9        | -0.294546405 | 8.51E-05    |
| ENSMUSG0000000030612 | Mpr4k6     | -0.294419111 | 8.02E-10    |
| ENSMUSG000000004351  | Ssr2       | -0.294188153 | 0.001026968 |
| ENSMUSG000000005891  | Trap1      | -0.293839273 | 0.022747136 |
| ENSMUSG000000003894  | Rap2b      | -0.293647824 | 0.00590358  |
| ENSMUSG000000003363  | Pp1a3      | -0.293541797 | 7.72E-09    |
| ENSMUSG000000003028  | Metml      | -0.293291223 | 0.00060125  |
| ENSMUSG00000001728   | Atp5md     | -0.293260643 | 1.57E-10    |
| ENSMUSG000000000698  | Psmr2d     | -0.292677109 | 0.000747486 |
| ENSMUSG00000001971   | Spca1      | -0.292479355 | 0.023607887 |
| ENSMUSG000000006378  | Chcd1f     | -0.292458724 | 2.93E-05    |
| ENSMUSG000000003219  | Fbx14      | -0.292264369 | 0.00759845  |
| ENSMUSG00000002047   | Coq3       | -0.292030749 | 0.002269371 |
| ENSMUSG000000025027  | Xpprpep1   | -0.291549865 | 1.43E-25    |
| ENSMUSG000000005061  | Uba3       | -0.290982161 | 3.45E-05    |
| ENSMUSG0000000054598 | J130230L23 | -0.29103323  | 1.08E-09    |
| ENSMUSG000000003282  | Cmas       | -0.29060203  | 0.04257107  |
| ENSMUSG000000008475  | Arp5c      | -0.28999225  | 0.01058096  |
| ENSMUSG000000001819  | Emc8       | -0.289875718 | 0.004454409 |
| ENSMUSG000000003164  | Memo1      | -0.289538677 | 0.003216875 |
| ENSMUSG000000002906  | Mpr20      | -0.289033343 | 2.01E-08    |
| ENSMUSG0000000090136 | Moi10177   | -0.288822416 | 1.06E-06    |
| ENSMUSG0000000031776 | Ar2bp2     | -0.288535912 | 0.049113022 |
| ENSMUSG000000002942  | Vps29      | -0.288052158 | 9.06E-05    |
| ENSMUSG0000000019373 | C9a3       | -0.287900197 | 3.94E-05    |
| ENSMUSG000000003448  | Amc8       | -0.287536102 | 0.003552609 |
| ENSMUSG00000000411   | Cbx7       | -0.287436263 | 0.001925498 |
| ENSMUSG00000001221   | Psmc3      | -0.287398971 | 0.001035531 |
| ENSMUSG000000007681  | Xrd5       | -0.287092339 | 0.001878751 |
| ENSMUSG000000005616  | Usp16      | -0.287032957 | 1.81E-06    |
| ENSMUSG000000005310  | Nr1        | -0.286905735 | 0.001972829 |
| ENSMUSG000000005827  | Mpr514     | -0.286575203 | 0.016040978 |
| ENSMUSG000000024999  | Ndurf2     | -0.285942393 | 9.66E-19    |
| ENSMUSG00000001718   | Pppr1r1b   | -0.285601429 | 0.001765034 |
| ENSMUSG000000002348  | Prr1b      | -0.285384429 | 4.15E-10    |
| ENSMUSG0000000054662 | Ano9       | -0.284680271 | 0.030140508 |
| ENSMUSG0000000110444 | Koi10033   | -0.284684504 | 0.047844666 |
| ENSMUSG0000000028737 | Alch4a1    | -0.284632348 | 9.02E-08    |
| ENSMUSG000000055320  | Tead1      | -0.28457715  | 5.65E-10    |
| ENSMUSG000000020108  | Dd14       | -0.284277897 | 0.014911637 |
| ENSMUSG0000000021962 | Dcp1a      | -0.28410759  | 1.49E-05    |
| ENSMUSG0000000038225 | Primpol    | -0.283922285 | 0.00959571  |
| ENSMUSG000000059743  | Fdps       | -0.283683897 | 6.35E-08    |
| ENSMUSG000000004244  | Bindy2     | -0.283265504 | 0.000234721 |
| ENSMUSG0000000051223 | Bzr1       | -0.283184019 | 0.043079913 |
| ENSMUSG0000000025429 | Pstip2     | -0.283123706 | 3.56E-06    |
| ENSMUSG000000005859  | Ime3d      | -0.283004328 | 1.83E-14    |
| ENSMUSG0000000091757 | Rps2-ps10  | -0.282638727 | 0.033964931 |
| ENSMUSG0000000070713 | Hmgm2-ps   | -0.282254165 | 0.037299613 |
| ENSMUSG000000002576  | Cank1a1    | -0.28225415  | 5.48E-07    |
| ENSMUSG000000004224  | Ndurf6     | -0.282014124 | 1.08E-21    |
| ENSMUSG000000002329  | Mdp1       | -0.281951678 | 7.05E-12    |
| ENSMUSG000000002660  | Soat1      | -0.281897481 | 0.009144356 |
| ENSMUSG000000018217  | Pmp22      | -0.281770295 | 1.50E-21    |
| ENSMUSG0000000031173 | Otc        | -0.281747868 | 6.14E-06    |
| ENSMUSG000000005630  | Hprt       | -0.280804104 | 0.000491529 |
| ENSMUSG000000000000  | Septin11   | -0.280034265 | 7.75E-06    |
| ENSMUSG000000002854  | Mycl       | -0.280021584 | 0.003419422 |
| ENSMUSG000000001684  | Pde6b      | -0.279513588 | 2.10E-06    |
| ENSMUSG0000000027940 | Tpm3       | -0.279470185 | 0.005704977 |
| ENSMUSG0000000035960 | Apxk1      | -0.279214196 | 0.015689327 |
| ENSMUSG0000000020328 | Nudcd2     | -0.279176182 | 0.011324528 |

|                        |            |             |             |
|------------------------|------------|-------------|-------------|
| ENSMUSG0000000033909   | Usp3b      | 0.390697019 | 0.001926304 |
| ENSMUSG000000005278    | Flnb       | 0.390675653 | 2.21E-09    |
| ENSMUSG0000000087119   | Atga4a-ps  | 0.390043346 | 0.019520074 |
| ENSMUSG0000000022574   | Naprt1     | 0.38998159  | 1.82E-07    |
| ENSMUSG0000000062866   | Phactr2    | 0.389793909 | 8.34E-07    |
| ENSMUSG000000001028    | Mip1p      | 0.38941862  | 0.01152163  |
| ENSMUSG00000000021782  | Dlg5       | 0.389339156 | 1.21E-06    |
| ENSMUSG0000000032902   | S1c16a1    | 0.38906607  | 1.46E-06    |
| ENSMUSG0000000008214   | Gclm       | 0.388526626 | 6.95E-12    |
| ENSMUSG0000000027510   | Rbm38      | 0.388050566 | 0.015007255 |
| ENSMUSG0000000002856   | Tmem11a    | 0.3878719   | 0.041177463 |
| ENSMUSG0000000003660   | Snmpp200   | 0.387559646 | 0.001169991 |
| ENSMUSG00000000031767  | Nud7       | 0.387527177 | 1.43E-21    |
| ENSMUSG0000000028405   | Aco1       | 0.387359982 | 0.001654081 |
| ENSMUSG0000000017679   | Ttpal      | 0.387090678 | 0.000654262 |
| ENSMUSG0000000037390   | Muc3       | 0.387086366 | 3.39E-05    |
| ENSMUSG000000000242207 | Kdm5b      | 0.386882235 | 0.02409627  |
| ENSMUSG0000000029426   | Scarb2     | 0.386753138 | 0.0234862   |
| ENSMUSG0000000038351   | Sgsm2      | 0.386649057 | 0.038018638 |
| ENSMUSG0000000000881   | Dlg3       | 0.386396065 | 0.042395818 |
| ENSMUSG0000000032121   | Tmem218    | 0.38586711  | 0.025030315 |
| ENSMUSG0000000037210   | Fam193a    | 0.384889504 | 7.37E-05    |
| ENSMUSG0000000019864   | Rhm41p1    | 0.384804215 | 0.014092674 |
| ENSMUSG0000000018900   | S1c22a5    | 0.384010281 | 6.34E-17    |
| ENSMUSG0000000024866   | Acy3       | 0.383905186 | 4.33E-10    |
| ENSMUSG00000000027665  | Pik3ca     | 0.383751021 | 0.02841654  |
| ENSMUSG0000000033373   | Fntb       | 0.383499618 | 2.47E-07    |
| ENSMUSG0000000048920   | Flrp       | 0.382366336 | 0.002321765 |
| ENSMUSG0000000038174   | Hyc2       | 0.383153728 | 5.51E-07    |
| ENSMUSG0000000039967   | Zfp292     | 0.382096635 | 0.038452778 |
| ENSMUSG0000000015341   | Golga7     | 0.382089302 | 0.045996202 |
| ENSMUSG000000002790    | Sis        | 0.381996836 | 1.13E-71    |
| ENSMUSG0000000010067   | Rasaf1     | 0.381920659 | 0.02931142  |
| ENSMUSG0000000034157   | P1cc1      | 0.381458372 | 0.000182056 |
| ENSMUSG0000000037674   | Rfx7       | 0.381134039 | 0.000412565 |
| ENSMUSG000000002990    | Adgr3a     | 0.380844146 | 0.029061958 |
| ENSMUSG000000004628    | Zyve1      | 0.380620942 | 0.01962715  |
| ENSMUSG0000000034647   | Ankr12     | 0.380510632 | 2.01E-08    |
| ENSMUSG0000000019889   | P1prk      | 0.380294992 | 1.35E-07    |
| ENSMUSG0000000030741   | Spns1      | 0.380278873 | 0.017283857 |
| ENSMUSG0000000078676   | Cas2b      | 0.380230693 | 0.003506589 |
| ENSMUSG0000000026987   | Bac2b      | 0.379951667 | 0.00726097  |
| ENSMUSG0000000032340   | Neo1       | 0.378900119 | 1.91E-07    |
| ENSMUSG0000000025198   | Erlin1     | 0.378659118 | 5.90E-09    |
| ENSMUSG0000000021411   | P1cdc1     | 0.378087494 | 8.22E-10    |
| ENSMUSG0000000026176   | Ctdsp1     | 0.377983545 | 1.54E-07    |
| ENSMUSG0000000021540   | Smds5      | 0.377607323 | 0.000205881 |
| ENSMUSG0000000020659   | Cbl1       | 0.375780975 | 0.000505758 |
| ENSMUSG0000000029502   | Golga3     | 0.377141238 | 0.000355004 |
| ENSMUSG0000000022364   | Tldc1d1    | 0.376795596 | 3.61E-13    |
| ENSMUSG0000000036019   | Tmr2c      | 0.376099545 | 0.029203545 |
| ENSMUSG0000000072825   | Cep170b    | 0.375830159 | 1.05E-05    |
| ENSMUSG0000000029672   | Famc3d     | 0.375634261 | 0.006365424 |
| ENSMUSG0000000024810   | Ik3        | 0.375512846 | 2.68E-12    |
| ENSMUSG0000000068876   | Cgn        | 0.375292558 | 1.34E-10    |
| ENSMUSG0000000033781   | Aab13      | 0.375241944 | 1.47E-18    |
| ENSMUSG0000000021975   | Ints9      | 0.375033113 | 0.04118817  |
| ENSMUSG0000000036363   | Bwn3d      | 0.375014633 | 0.000913741 |
| ENSMUSG0000000043019   | Edm3       | 0.373933427 | 7.53E-09    |
| ENSMUSG0000000028223   | Decr1      | 0.373771895 | 7.57E-15    |
| ENSMUSG0000000034957   | Cuxp1      | 0.373386792 | 1.59E-06    |
| ENSMUSG0000000029705   | Ceb1       | 0.37316345  | 1.17E-13    |
| ENSMUSG0000000037079   | Rbbp6      | 0.372868914 | 4.09E-12    |
| ENSMUSG0000000038369   | Ncoa6      | 0.37205914  | 0.000898932 |
| ENSMUSG0000000026265   | Akap8l     | 0.371747733 | 0.005549479 |
| ENSMUSG0000000034390   | Cmp        | 0.371657805 | 0.031417028 |
| ENSMUSG0000000022816   | Fstl1      | 0.371384929 | 0.005185075 |
| ENSMUSG0000000040455   | Aqp1       | 0.371148277 | 8.85E-13    |
| ENSMUSG000000004489    | Usp1       | 0.371110133 | 4.59E-11    |
| ENSMUSG0000000039046   | Usp1n1     | 0.370234262 | 0.009456619 |
| ENSMUSG0000000006631   | Myo18a     | 0.370196748 | 1.84E-06    |
| ENSMUSG0000000026663   | Ayf6       | 0.369603466 | 5.81E-06    |
| ENSMUSG0000000028053   | Ash11      | 0.369541718 | 6.96E-06    |
| ENSMUSG0000000049658   | Bdp1       | 0.369121696 | 1.47E-06    |
| ENSMUSG0000000051910   | Spxb       | 0.368756885 | 0.019982045 |
| ENSMUSG0000000025314   | Potr       | 0.368495592 | 1.70E-05    |
| ENSMUSG0000000024380   | Spn1       | 0.368255033 | 0.000150298 |
| ENSMUSG00000000021991  | Spat13     | 0.368150853 | 0.017029317 |
| ENSMUSG0000000034300   | Fam3a1c    | 0.367786651 | 0.00060221  |
| ENSMUSG0000000045071   | E130308A19 | 0.367704651 | 0.001768129 |
| ENSMUSG0000000044433   | Csmx3      | 0.367671542 | 4.08E-11    |
| ENSMUSG0000000028485   | Snrp30     | 0.367420803 | 0.001282204 |
| ENSMUSG0000000033948   | Zwrmf5     | 0.367080427 | 0.03047745  |
| ENSMUSG0000000074182   | Zhh1t6     | 0.36627484  | 0.014138171 |
| ENSMUSG0000000039450   | Dcy        | 0.365996962 | 0.011620851 |
| ENSMUSG0000000017311   | Pvr        | 0.365794398 | 1.64E-103   |
| ENSMUSG0000000029550   | App3       | 0.365680121 | 1.86E-11    |
| ENSMUSG0000000029545   | Sacd3      | 0.364909895 | 0.004460103 |
| ENSMUSG0000000019158   | Tmem160    | 0.364851955 | 1.10E-33    |
| ENSMUSG0000000020447   | Npc111     | 0.36451388  | 1.55E-06    |
| ENSMUSG0000000041920   | S1c16a6    | 0.36413695  | 5.17E-126   |
| ENSMUSG0000000039952   | Dag1       | 0.363933032 | 8.82E-05    |
| ENSMUSG0000000035105   | Egln3      | 0.363738611 | 3.74E-09    |
| ENSMUSG0000000019404   | Cop6b      | 0.363545639 | 0.008181493 |
| ENSMUSG0000000068134   | Zfp120     | 0.363167834 | 6.65E-05    |
| ENSMUSG00000000096546  | Smr1       | 0.362620414 | 8.38E-37    |
| ENSMUSG0000000071659   | Hmnpu2     | 0.36242782  | 0.000164264 |
| ENSMUSG0000000066640   | Fbxl18     | 0.361904061 | 0.000341041 |
| ENSMUSG0000000045932   | Mira       | 0.361492442 | 5.81E-05    |
| ENSMUSG0000000054733   | Itir2      | 0.361191245 | 5.27E-18    |
| ENSMUSG0000000036528   | Pfz1btp2   | 0.361029296 | 0.039427702 |
| ENSMUSG0000000058655   | Erlf4b     | 0.360004823 | 7.57E-10    |
| ENSMUSG0000000020156   | Pai1       | 0.359654231 | 6.00E-06    |
| ENSMUSG000000004256    | Mx1        | 0.35848683  | 0.037917431 |
| ENSMUSG0000000037216   | P1a        | 0.358160134 | 0.035234992 |
| ENSMUSG0000000031352   | Hccs       | 0.357990976 | 7.00E-14    |
| ENSMUSG0000000023915   | Tnfrsf21   | 0.357736131 | 0.000517051 |
| ENSMUSG0000000014905   | Dnabp2     | 0.357690092 | 7.16E-09    |
| ENSMUSG0000000040918   | S1c19a2    | 0.357585311 | 5.72E-06    |
| ENSMUSG0000000047264   | Zfp358     | 0.357050535 | 0.003174749 |
| ENSMUSG0000000064351   | Cox1       | 0.356624117 | 3.07E-06    |
| ENSMUSG0000000031229   | Ata1       | 0.356197446 | 2.35E-07    |
| ENSMUSG0000000047454   | Srmr26     | 0.356166443 | 6.57E-07    |
| ENSMUSG0000000046159   | Chrm3      | 0.355790386 | 0.008001785 |
| ENSMUSG0000000032579   | Herm1      | 0.355760511 | 0.0118386   |
| ENSMUSG0000000020238   | Ncln       | 0.355302876 | 0.039730868 |
| ENSMUSG0000000012146   | Ube2-d-ps  | 0.355337033 | 1.95E-05    |
| ENSMUSG0000000022994   | Adcy6      | 0.354937509 | 1.10E-06    |
| ENSMUSG0000000021944   | Gat2b      | 0.354903869 | 2.33E-08    |
| ENSMUSG0000000059456   | P1k4       | 0.354376484 | 0.008001785 |
| ENSMUSG0000000078942   | Naip6      | 0.35407272  | 8.23E-07    |
| ENSMUSG0000000021366   | Hwip1      | 0.354254524 | 6.04E-05    |

|                      |             |              |             |
|----------------------|-------------|--------------|-------------|
| ENSMUSG00000029017   | Pmpcb       | -0.278836221 | 7.47E-06    |
| ENSMUSG00000012490   | Aldoc       | -0.27857776  | 7.22E-20    |
| ENSMUSG00000002844   | Ban11       | -0.278458789 | 1.13E-05    |
| ENSMUSG00000003204   | Cox14       | -0.277829038 | 4.79E-09    |
| ENSMUSG000000031527  | Er1         | -0.277750515 | 0.001959691 |
| ENSMUSG00000006883   | Rpl171      | -0.277733833 | 0.002166604 |
| ENSMUSG000000016333  | Mrsps18c    | -0.277705248 | 0.000809269 |
| ENSMUSG00000002373   | Rhoc        | -0.277611065 | 1.26E-37    |
| ENSMUSG0000000033751 | Gadd45gpl1  | -0.276981837 | 0.013630866 |
| ENSMUSG000000003032  | Klf4        | -0.27692384  | 5.40E-13    |
| ENSMUSG00000001040   | Slrp        | -0.276838407 | 0.002407021 |
| ENSMUSG000000025465  | Echs1       | -0.276789454 | 1.59E-11    |
| ENSMUSG000000025888  | Casp1       | -0.276697409 | 2.15E-08    |
| ENSMUSG000000015880  | Ncang       | -0.276441073 | 0.007399736 |
| ENSMUSG000000021906  | Ovmd1       | -0.27614174  | 2.27E-13    |
| ENSMUSG000000021906  | Mier2       | -0.275928413 | 0.024554323 |
| ENSMUSG000000028165  | Cis2d       | -0.275742491 | 0.000157942 |
| ENSMUSG00000005153   | Scoc6       | -0.27535043  | 2.79E-06    |
| ENSMUSG000000018921  | Pelp1       | -0.274627872 | 0.000308515 |
| ENSMUSG000000048537  | Phlbi1      | -0.274610857 | 3.76E-05    |
| ENSMUSG000000025742  | Prrs2       | -0.273065538 | 0.004146123 |
| ENSMUSG000000029713  | Gnb2        | -0.273063615 | 0.00011614  |
| ENSMUSG0000000708    | Kat2b       | -0.273035058 | 0.004320801 |
| ENSMUSG00000004918   | Inafm2      | -0.272826038 | 5.26E-07    |
| ENSMUSG000000050256  | Ztp217      | -0.272806038 | 0.017524734 |
| ENSMUSG000000045474  | Thms2       | -0.27274104  | 0.003879406 |
| ENSMUSG000000002962  | Gm5436      | -0.272716529 | 2.01E-09    |
| ENSMUSG000000032022  | Ratz7a      | -0.272606066 | 0.029014665 |
| ENSMUSG00000002877   | Kat2d       | -0.272261963 | 4.19E-16    |
| ENSMUSG00000004879   | Pe1         | -0.272198655 | 1.11E-05    |
| ENSMUSG000000012589  | Mmc3        | -0.271671664 | 0.000144759 |
| ENSMUSG000000070394  | Tmm256      | -0.271630518 | 4.29E-05    |
| ENSMUSG000000026618  | Ctcb6       | -0.271532181 | 0.002059865 |
| ENSMUSG000000026618  | Iars2       | -0.271385064 | 4.93E-08    |
| ENSMUSG00000006293   | Ufci1       | -0.271062292 | 0.009811712 |
| ENSMUSG000000037616  | Cope9       | -0.271012085 | 2.75E-08    |
| ENSMUSG000000020899  | Pfas        | -0.270610832 | 7.72E-06    |
| ENSMUSG000000041688  | Amot        | -0.270461107 | 0.00071503  |
| ENSMUSG000000020810  | Gar1        | -0.270343232 | 1.02E-05    |
| ENSMUSG0000000115338 | Pnp         | -0.269873085 | 1.00E-30    |
| ENSMUSG000000078812  | Erif5a      | -0.269850251 | 0.001920703 |
| ENSMUSG000000038302  | Gwp3        | -0.269710216 | 7.35E-11    |
| ENSMUSG000000018339  | Alg1        | -0.269399014 | 0.016212652 |
| ENSMUSG000000029472  | Anapc5      | -0.269318127 | 0.004061966 |
| ENSMUSG0000000494    | Pomp        | -0.269233977 | 0.003713724 |
| ENSMUSG000000029038  | Snr2        | -0.269117377 | 4.64E-09    |
| ENSMUSG0000000339193 | Lus4        | -0.269023616 | 3.34E-08    |
| ENSMUSG000000019851  | Pup         | -0.268776569 | 0.048314041 |
| ENSMUSG000000031286  | Glt28d2     | -0.267996781 | 0.002832508 |
| ENSMUSG000000021460  | Nap1        | -0.267852983 | 2.56E-12    |
| ENSMUSG000000023487  | Canb2b      | -0.267495737 | 0.001502127 |
| ENSMUSG000000021764  | Ndrf4       | -0.266789476 | 2.34E-08    |
| ENSMUSG000000020514  | Pycr1       | -0.266546567 | 0.000683781 |
| ENSMUSG00000005119   | Chmp3       | -0.266521815 | 0.001207157 |
| ENSMUSG000000021969  | Chmp3       | -0.266498264 | 1.21E-09    |
| ENSMUSG00000004717   | Paxc        | -0.265664319 | 1.61E-08    |
| ENSMUSG000000025289  | Prdx4       | -0.265558978 | 0.001842335 |
| ENSMUSG000000028998  | Tomm7       | -0.265044548 | 0.014678503 |
| ENSMUSG00000002025   | Phid1a      | -0.264830916 | 0.006705753 |
| ENSMUSG000000044894  | Uqcrr       | -0.264442048 | 1.38E-11    |
| ENSMUSG000000031960  | Aas         | -0.264151495 | 0.000532479 |
| ENSMUSG00000003179   | Pstk        | -0.264075732 | 2.41E-05    |
| ENSMUSG000000025940  | Tmm70       | -0.263875806 | 4.89E-06    |
| ENSMUSG000000029198  | Grpel1      | -0.263855814 | 2.10E-09    |
| ENSMUSG000000030483  | Cyp2b10     | -0.263840313 | 1.80E-39    |
| ENSMUSG000000031156  | Dctn6       | -0.263677682 | 0.014948642 |
| ENSMUSG000000018897  | Aatf        | -0.263584018 | 0.005351994 |
| ENSMUSG000000029068  | Cnrl2       | -0.263432573 | 1.09E-05    |
| ENSMUSG00000001156   | Mud         | -0.263091446 | 0.000326425 |
| ENSMUSG000000021427  | Ssr1        | -0.263009111 | 0.032469343 |
| ENSMUSG000000038890  | Ap2j2       | -0.262591038 | 5.93E-12    |
| ENSMUSG000000032340  | Bhd5        | -0.262513391 | 6.86E-11    |
| ENSMUSG000000027793  | Dga1a4      | -0.262274676 | 9.94E-10    |
| ENSMUSG000000056234  | Ncaa        | -0.262176077 | 0.000550084 |
| ENSMUSG00000002268   | Wars1       | -0.261703794 | 1.24E-08    |
| ENSMUSG000000021573  | Tppp        | -0.261581366 | 7.03E-05    |
| ENSMUSG000000034424  | Gsch        | -0.261561093 | 0.002277266 |
| ENSMUSG000000024993  | Dmnd10      | -0.261139508 | 0.037824587 |
| ENSMUSG000000029955  | Pfch2       | -0.260544004 | 0.017198637 |
| ENSMUSG000000032198  | Dock6       | -0.260220711 | 0.016708449 |
| ENSMUSG0000000091269 | Gm6882      | -0.259702016 | 0.001693908 |
| ENSMUSG000000054419  | Mett1a7     | -0.259664583 | 0.043501023 |
| ENSMUSG000000005445  | Cyb561a3    | -0.2585762   | 0.006054813 |
| ENSMUSG000000045160  | Bola3       | -0.258576112 | 4.18E-28    |
| ENSMUSG000000006961  | Slc14a4     | -0.258526398 | 1.75E-10    |
| ENSMUSG000000029610  | Aimp2       | -0.257774597 | 0.011347844 |
| ENSMUSG000000103630  | 2010103.J01 | -0.257556579 | 0.004900184 |
| ENSMUSG000000021731  | Mrsps30     | -0.257482421 | 6.24E-07    |
| ENSMUSG000000030733  | Ap11m1      | -0.257262898 | 0.049255473 |
| ENSMUSG000000031886  | Mmt1        | -0.256783647 | 0.032537396 |
| ENSMUSG000000007175  | Samd91      | -0.256755588 | 1.49E-10    |
| ENSMUSG000000027506  | Tpd52       | -0.2566684   | 0.004273545 |
| ENSMUSG000000034610  | Tut4        | -0.256586023 | 2.61E-05    |
| ENSMUSG000000048722  | Dca24se1    | -0.256154814 | 0.034301603 |
| ENSMUSG000000027082  | Tfp1        | -0.255638086 | 6.20E-25    |
| ENSMUSG000000015247  | Nipnan3b    | -0.255446025 | 0.000350054 |
| ENSMUSG000000022205  | Sub1        | -0.255086251 | 0.000502241 |
| ENSMUSG000000024215  | Spdfe       | -0.254839363 | 7.71E-05    |
| ENSMUSG000000028587  | Orc1        | -0.254671169 | 0.03167774  |
| ENSMUSG000000070991  | Rum3        | -0.254088449 | 0.011130369 |
| ENSMUSG000000025857  | Vynaz       | -0.253912015 | 3.50E-11    |
| ENSMUSG000000052305  | Hbb-b1      | -0.253580897 | 0.000179124 |
| ENSMUSG000000035811  | Utp2b35     | -0.253420557 | 2.32E-35    |
| ENSMUSG000000022906  | Parp9       | -0.253381118 | 2.33E-08    |
| ENSMUSG000000028156  | Etf4e       | -0.252634353 | 0.000543331 |
| ENSMUSG000000033386  | Frrs1       | -0.252590698 | 4.46E-34    |
| ENSMUSG000000000215  | Klf14       | -0.252033055 | 4.94E-09    |
| ENSMUSG000000083992  | Gm11478     | -0.251978738 | 0.044253433 |
| ENSMUSG000000027200  | Sema8d      | -0.251777743 | 0.033189239 |
| ENSMUSG000000031934  | Parx1       | -0.251284374 | 2.35E-11    |
| ENSMUSG000000027001  | Dusp19      | -0.250947036 | 0.005464815 |
| ENSMUSG000000021458  | Aocpp       | -0.250901236 | 0.047070601 |
| ENSMUSG000000029632  | Ndr4f       | -0.250886221 | 1.35E-08    |
| ENSMUSG000000021235  | Coq6        | -0.250473775 | 1.72E-05    |
| ENSMUSG000000005663  | Atsp5b      | -0.250193761 | 5.29E-13    |
| ENSMUSG000000005663  | Baat        | -0.250081697 | 0.001414355 |
| ENSMUSG000000106918  | Mpr33       | -0.250058971 | 0.007110926 |
| ENSMUSG000000060548  | Tnfrsf19    | -0.25003132  | 0.00172585  |
| ENSMUSG00000002435   | Smx24       | -0.2495161   | 0.039809059 |
| ENSMUSG000000024854  | Polid4      | -0.249322311 | 0.00958511  |
| ENSMUSG00000001930   | Spryd7      | -0.249288119 | 6.51E-15    |
| ENSMUSG000000019998  | Stx7        | -0.249162816 | 1.57E-16    |

|                      |          |             |             |
|----------------------|----------|-------------|-------------|
| ENSMUSG000000019795  | Pomt1    | 0.353932681 | 4.82E-07    |
| ENSMUSG0000000028860 | Syt11    | 0.353625516 | 0.00069848  |
| ENSMUSG000000007813  | Xkr9     | 0.353525668 | 0.00108899  |
| ENSMUSG000000061414  | Cracr2a  | 0.353502347 | 0.00171102  |
| ENSMUSG000000038459  | Ahbd17c  | 0.353495475 | 1.71E-12    |
| ENSMUSG000000026589  | Sect16b  | 0.353493073 | 1.25E-05    |
| ENSMUSG000000008154  | Rabep1   | 0.353101821 | 5.90E-06    |
| ENSMUSG000000019996  | Map7     | 0.353036714 | 0.033029589 |
| ENSMUSG000000002145  | Fhp2     | 0.352940023 | 5.47E-09    |
| ENSMUSG000000043308  | Sdr42a1  | 0.352940259 | 0.023198941 |
| ENSMUSG0000000022555 | Dgat1    | 0.352610058 | 5.75E-07    |
| ENSMUSG0000000033054 | Npat     | 0.352479587 | 0.016355893 |
| ENSMUSG000000026235  | Epha4    | 0.351889759 | 5.84E-12    |
| ENSMUSG000000064373  | Selenop  | 0.35155338  | 3.03E-12    |
| ENSMUSG0000000022641 | Bbx      | 0.351266456 | 0.000950705 |
| ENSMUSG0000000028861 | Mps15    | 0.350499785 | 7.29E-10    |
| ENSMUSG000000004483  | Purb     | 0.350265631 | 0.003392795 |
| ENSMUSG000000004483  | Ccny     | 0.349460695 | 0.02022254  |
| ENSMUSG0000000038949 | Cnst     | 0.349001081 | 0.00238078  |
| ENSMUSG000000007880  | Ancl1a   | 0.348407381 | 2.85E-09    |
| ENSMUSG0000000059498 | Fcgr3    | 0.348394846 | 0.02700555  |
| ENSMUSG000000048154  | Kmt2d    | 0.34837777  | 0.020988512 |
| ENSMUSG000000024219  | Anks1    | 0.347993872 | 0.02204748  |
| ENSMUSG0000000021278 | Amm      | 0.347637099 | 5.28E-09    |
| ENSMUSG0000000098027 | Art14    | 0.347629617 | 2.24E-11    |
| ENSMUSG000000004906  | Zfp644   | 0.347001976 | 0.00045216  |
| ENSMUSG000000003746  | Man1a    | 0.346921265 | 0.003745688 |
| ENSMUSG000000004266  | Ptpn6    | 0.346480027 | 0.01427353  |
| ENSMUSG000000014547  | Wdfy2    | 0.346132708 | 0.024666542 |
| ENSMUSG0000000024533 | Spire1   | 0.346058626 | 0.018591429 |
| ENSMUSG000000039087  | Preb1    | 0.345569095 | 0.000288229 |
| ENSMUSG0000000019873 | Reep2    | 0.345527485 | 0.002486837 |
| ENSMUSG000000034940  | Syng1    | 0.34528617  | 3.69E-05    |
| ENSMUSG000000003403  | Pjarr    | 0.344830843 | 2.64E-07    |
| ENSMUSG000000027889  | Amp2d    | 0.34458991  | 0.00863041  |
| ENSMUSG000000053390  | Zfp952   | 0.344309705 | 1.65E-05    |
| ENSMUSG000000074218  | Cox7a1   | 0.344145913 | 2.01E-45    |
| ENSMUSG000000036501  | Fam13b   | 0.344108426 | 0.04423346  |
| ENSMUSG000000055670  | Zef1     | 0.343860682 | 0.025987712 |
| ENSMUSG000000001604  | Tsra3    | 0.343664251 | 1.55E-06    |
| ENSMUSG0000000029030 | Tcpl     | 0.343385689 | 0.03548192  |
| ENSMUSG000000034525  | Igr1     | 0.343271981 | 0.00122028  |
| ENSMUSG0000000034931 | Dh8      | 0.342697419 | 0.000714428 |
| ENSMUSG0000000017453 | Pipop    | 0.342131563 | 8.58E-29    |
| ENSMUSG000000021687  | Scamp1   | 0.341720213 | 7.54E-11    |
| ENSMUSG0000000031534 | Smm19    | 0.341431074 | 5.85E-07    |
| ENSMUSG000000035722  | Aba7     | 0.341377159 | 0.044092504 |
| ENSMUSG000000027984  | Hadh     | 0.340965351 | 1.73E-32    |
| ENSMUSG000000032599  | Ipbk2    | 0.340914718 | 2.63E-05    |
| ENSMUSG000000009905  | Kdr      | 0.340664482 | 3.72E-05    |
| ENSMUSG000000048027  | Rgm3     | 0.340398803 | 6.39E-05    |
| ENSMUSG0000000049154 | Fam183b  | 0.340325742 | 3.61E-15    |
| ENSMUSG000000019947  | Ancl5b   | 0.33998057  | 0.002315008 |
| ENSMUSG0000000079071 | Slc28a2b | 0.338574402 | 1.13E-13    |
| ENSMUSG000000001418  | Glmf     | 0.338296706 | 0.002491715 |
| ENSMUSG000000007003  | Sabp4    | 0.338126278 | 5.55E-05    |
| ENSMUSG000000021488  | Ned1     | 0.337848852 | 1.82E-05    |
| ENSMUSG000000060248  | Htr3b    | 0.337505458 | 3.32E-12    |
| ENSMUSG000000024079  | Erf2ak2  | 0.337040415 | 0.04241373  |
| ENSMUSG000000026385  | Zf1      | 0.33699279  | 2.52E-07    |
| ENSMUSG000000038331  | Satb2    | 0.336601385 | 1.71E-14    |
| ENSMUSG000000039031  | Arhgap18 | 0.335071001 | 0.00781069  |
| ENSMUSG000000024990  | Rbp4     | 0.33562337  | 0.029213305 |
| ENSMUSG000000040502  | Marchf9  | 0.335367194 | 0.004325654 |
| ENSMUSG000000024900  | Cpt1a    | 0.335134602 | 1.57E-06    |
| ENSMUSG000000024247  | Pknox    | 0.335060069 | 0.024420475 |
| ENSMUSG000000031834  | Pik3r2   | 0.334902315 | 0.000783947 |
| ENSMUSG000000004610  | Etfb     | 0.334777877 | 5.65E-12    |
| ENSMUSG000000038485  | Soc7     | 0.33461967  | 0.00026345  |
| ENSMUSG000000031105  | Slc25a14 | 0.334288391 | 0.031298191 |
| ENSMUSG000000031753  | Cog4     | 0.33400987  | 0.005163594 |
| ENSMUSG000000032594  | Ipbk1    | 0.33347291  | 0.004174213 |
| ENSMUSG000000063253  | Soc      | 0.332865327 | 2.10E-26</  |

|                        |            |               |             |                      |          |              |             |                      |          |               |             |                     |          |             |             |
|------------------------|------------|---------------|-------------|----------------------|----------|--------------|-------------|----------------------|----------|---------------|-------------|---------------------|----------|-------------|-------------|
| ENSMUSG00000003744     | Rps3       | -0.249112331  | 0.029491811 | ENSMUSG000000029723  | Spacdr   | 0.322689361  | 0.000453139 | ENSMUSG00000048992   | Pras32   | -0.224418204  | 3.22E-15    | ENSMUSG00000005881  | Engic3   | 0.253467899 | 1.96E-05    |
| ENSMUSG00000003373     | Car12      | -0.248972493  | 5.32E-12    | ENSMUSG00000004841   | Er1ad    | 0.322539311  | 8.22E-26    | ENSMUSG00000004168   | Ir2bjpl  | -0.224359992  | 5.08E-05    | ENSMUSG000000046139 | Pat1l    | 0.253030887 | 0.045071816 |
| ENSMUSG00000004496     | Ppp1cc     | -0.248587945  | 0.014704092 | ENSMUSG00000003731   | Larp1    | 0.322371017  | 3.75E-11    | ENSMUSG000000048534  | Zjbnl    | -0.224043958  | 3.63E-12    | ENSMUSG000000032178 | Exoc34   | 0.252573278 | 0.000345574 |
| ENSMUSG00000005047     | Fam136a    | -0.247996826  | 5.49E-10    | ENSMUSG00000002292   | Rm2bz    | 0.322112211  | 0.023642190 | ENSMUSG000000068749  | Pma5a    | -0.222614422  | 0.00468592  | ENSMUSG000000050697 | Prkaa1   | 0.252648662 | 0.001108449 |
| ENSMUSG00000002294     | Gosr2      | -0.247958012  | 1.60E-06    | ENSMUSG00000004168   | Rm2bz    | 0.322197915  | 5.08E-05    | ENSMUSG000000058546  | Hnmpc    | -0.222555157  | 0.000952451 | ENSMUSG000000021280 | Exoc34   | 0.252623039 | 7.99E-32    |
| ENSMUSG00000002343     | Kcnk5      | -0.247928676  | 0.000424806 | ENSMUSG000000024597  | Sltc2a2  | 0.3221753145 | 4.55E-13    | ENSMUSG000000024384  | Iws1a    | -0.222316795  | 0.001546016 | ENSMUSG000000028894 | Inppb5   | 0.25255843  | 3.21E-06    |
| ENSMUSG000000004181    | Ndrufa1    | -0.247878477  | 6.97E-13    | ENSMUSG000000019873  | Taco1    | 0.321395877  | 2.58E-06    | ENSMUSG000000042853  | Enhadh   | -0.222149178  | 0.02344525  | ENSMUSG000000028286 | Ptnr18   | 0.252460086 | 6.38E-18    |
| ENSMUSG0000000097354   | Z130001H17 | -0.247516949  | 0.02598568  | ENSMUSG000000016494  | Cd3a     | 0.32089177   | 0.011209708 | ENSMUSG000000060716  | Plekhh1  | -0.221951095  | 0.011223877 | ENSMUSG000000024844 | Bart1    | 0.252331622 | 1.13E-05    |
| ENSMUSG00000000021496  | Cncp2      | -0.247113267  | 0.000105556 | ENSMUSG000000002546  | Golp2    | 0.320731283  | 0.000251749 | ENSMUSG00000007184   | Skapc    | -0.2217609381 | 7.88E-11    | ENSMUSG000000029339 | Cba      | 0.251572656 | 5.39E-24    |
| ENSMUSG000000003765    | Mt1        | -0.2471100487 | 6.60E-05    | ENSMUSG000000046447  | Carm2n1  | 0.319891987  | 0.006145375 | ENSMUSG000000037580  | Gch1     | -0.221283861  | 1.07E-09    | ENSMUSG000000016496 | Cd274    | 0.251519532 | 0.002402177 |
| ENSMUSG0000000002895   | Smim8      | -0.246971816  | 1.11E-05    | ENSMUSG0000000040760 | Appl1    | 0.319301987  | 1.99E-05    | ENSMUSG000000030788  | Rnf141   | -0.220958731  | 0.001378976 | ENSMUSG000000038582 | Pctc7    | 0.251425531 | 0.00663748  |
| ENSMUSG0000000045503   | Sys1       | -0.246933352  | 0.013314323 | ENSMUSG000000038708  | Golga4   | 0.319251009  | 1.71E-05    | ENSMUSG000000038365  | Fbw2a5   | -0.220711537  | 0.004424072 | ENSMUSG000000052812 | Atad2b   | 0.251340509 | 0.009122095 |
| ENSMUSG00000000038252  | Ncapd2     | -0.246743168  | 0.023700542 | ENSMUSG000000051224  | Tcanc    | 0.318943221  | 0.006328797 | ENSMUSG000000058546  | Rpl23a   | -0.22070762   | 0.000223612 | ENSMUSG000000025261 | Huwe1    | 0.250976745 | 0.000251276 |
| ENSMUSG0000000032246   | Calm4      | -0.246501425  | 5.54E-10    | ENSMUSG000000033306  | Lpp      | 0.31893941   | 5.11E-06    | ENSMUSG000000018401  | Mtmr4    | -0.220649528  | 0.04399908  | ENSMUSG000000004934 | Pias4    | 0.249776849 | 0.044943342 |
| ENSMUSG0000000030986   | Dhx32      | -0.246439219  | 1.30E-05    | ENSMUSG000000026932  | Nacc2    | 0.318934855  | 0.01046018  | ENSMUSG000000050777  | Tmem37   | -0.220469549  | 2.07E-24    | ENSMUSG000000032596 | Uba7     | 0.249425801 | 0.023476369 |
| ENSMUSG0000000005161   | Prdx2      | -0.246127111  | 5.37E-07    | ENSMUSG000000040220  | Gas8     | 0.318885724  | 0.040524515 | ENSMUSG000000072115  | Ang      | -0.220453292  | 3.60E-06    | ENSMUSG000000021893 | Capn7    | 0.249353063 | 0.00327057  |
| ENSMUSG0000000003838   | Pals2      | -0.245998619  | 5.27E-10    | ENSMUSG000000001928  | Ebp1     | 0.318388899  | 0.048646406 | ENSMUSG000000028563  | Tmcd2    | -0.220262468  | 0.002397492 | ENSMUSG000000043940 | Wdrf3    | 0.249044973 | 0.002093169 |
| ENSMUSG0000000002547   | Pdmr13     | -0.245851296  | 0.005133579 | ENSMUSG000000024558  | Hsp4     | 0.318170002  | 1.17E-09    | ENSMUSG000000023904  | Hctc1r1  | -0.220217837  | 0.005442206 | ENSMUSG000000007817 | Zmiz1    | 0.248782803 | 8.98E-11    |
| ENSMUSG00000000044627  | Swi5       | -0.245710159  | 1.66E-07    | ENSMUSG0000000001224 | Safb     | 0.317898525  | 0.003153346 | ENSMUSG000000024966  | Sym12p   | -0.219951272  | 0.006222221 | ENSMUSG000000039219 | Ani4d4   | 0.248786264 | 0.002214606 |
| ENSMUSG0000000004687   | Samd5      | -0.245602773  | 5.19E-15    | ENSMUSG0000000074064 | Myocd    | 0.317264288  | 7.77E-06    | ENSMUSG0000000004491 | Adp1r1   | -0.219853329  | 0.000111374 | ENSMUSG000000090258 | Churc1   | 0.247422175 | 0.035112721 |
| ENSMUSG00000000004648  | Trnaip8l1  | -0.24543714   | 1.50E-05    | ENSMUSG000000036267  | Pon2     | 0.317209748  | 3.74E-21    | ENSMUSG000000018559  | Ctdp1e1  | -0.219651028  | 0.000385292 | ENSMUSG000000026222 | Sp100    | 0.247242976 | 1.30E-17    |
| ENSMUSG0000000004670   | Immp11     | -0.245062742  | 0.008919567 | ENSMUSG000000025026  | Kid3     | 0.316750751  | 2.11E-17    | ENSMUSG000000015716  | Nolc1    | -0.219571134  | 0.031546335 | ENSMUSG000000050268 | Pir1     | 0.247213195 | 2.99E-05    |
| ENSMUSG00000000021967  | Mpr57      | -0.245043291  | 0.005246525 | ENSMUSG000000033863  | Klf9     | 0.315525354  | 4.34E-15    | ENSMUSG000000027184  | Caprin1  | -0.218989465  | 0.042573484 | ENSMUSG000000029050 | Ski1     | 0.247193314 | 5.07E-16    |
| ENSMUSG0000000068566   | Myadm      | -0.245008145  | 6.11E-13    | ENSMUSG000000031712  | Ifi5     | 0.315514848  | 5.27E-07    | ENSMUSG000000032786  | Alas1    | -0.217579911  | 0.000587982 | ENSMUSG000000025137 | Pcyl2    | 0.247091938 | 6.88E-07    |
| ENSMUSG00000000025103  | Etd3       | -0.24476666   | 0.046388134 | ENSMUSG00000003796   | Smpd3    | 0.315262409  | 1.06E-11    | ENSMUSG000000028563  | Mbz2     | -0.217468088  | 0.00119412  | ENSMUSG000000028249 | Pcyd2    | 0.246936418 | 0.042130774 |
| ENSMUSG00000000029347  | Rchy1      | -0.244776175  | 0.01555894  | ENSMUSG000000002957  | Ap2a2    | 0.315220098  | 0.000535213 | ENSMUSG000000038303  | Mlir6    | -0.216992954  | 1.06E-06    | ENSMUSG000000021520 | Uqcrb    | 0.246920996 | 0.000172563 |
| ENSMUSG00000000026398  | Nuck1      | -0.243715998  | 3.56E-12    | ENSMUSG000000037536  | Fbw34    | 0.31488772   | 0.004648715 | ENSMUSG000000020437  | Cllar    | -0.216589285  | 0.047840264 | ENSMUSG000000064210 | Aqob     | 0.246824838 | 0.000174531 |
| ENSMUSG00000000029171  | Pgm2       | -0.242865374  | 1.20E-08    | ENSMUSG000000033055  | Ankr5d4  | 0.314514426  | 0.00018191  | ENSMUSG000000034006  | Sic62a2  | -0.21617702   | 0.03195251  | ENSMUSG000000025103 | Btdn1    | 0.246015846 | 0.046388134 |
| ENSMUSG00000000002961  | Oncu2c     | -0.24234659   | 2.21E-107   | ENSMUSG000000030094  | Xpc      | 0.313875139  | 0.028064487 | ENSMUSG000000090935  | Sym12bp  | -0.215557735  | 2.46E-05    | ENSMUSG000000025103 | Ndrufa5  | 0.245904944 | 1.43E-14    |
| ENSMUSG00000000012261  | Diaph3     | -0.242280562  | 0.025142669 | ENSMUSG000000024294  | Mib1     | 0.313774869  | 0.008567265 | ENSMUSG000000032388  | Spg21    | -0.215528613  | 0.027159598 | ENSMUSG000000058006 | Cuc1     | 0.245276268 | 0.015238699 |
| ENSMUSG00000000004436  | Sltc19a1   | -0.242086555  | 2.30E-10    | ENSMUSG000000020859  | Spag9    | 0.313682355  | 0.029805808 | ENSMUSG0000000180672 | Lrrc75a  | -0.215180672  | 0.004147725 | ENSMUSG000000039205 | Ciz1     | 0.245434471 | 0.008543078 |
| ENSMUSG00000000031007  | Atp2ap2    | -0.242047832  | 0.000324815 | ENSMUSG000000027086  | Fastk21  | 0.313239169  | 0.049544718 | ENSMUSG000000020481  | Cpd      | -0.215158926  | 3.20E-12    | ENSMUSG000000006392 | Med8     | 0.245330155 | 0.007058908 |
| ENSMUSG00000000002107  | Idh3p      | -0.241483514  | 4.89E-10    | ENSMUSG000000043162  | Pyr1f    | 0.312818694  | 0.000172516 | ENSMUSG000000020298  | Treh     | -0.214916227  | 6.66E-77    | ENSMUSG000000052698 | Nhl1     | 0.244679775 | 1.53E-11    |
| ENSMUSG00000000030788  | Rnf141     | -0.240795475  | 0.001376976 | ENSMUSG000000063142  | Kcnma1   | 0.312523933  | 0.001725316 | ENSMUSG000000028419  | Chmp5    | -0.214751102  | 0.007532518 | ENSMUSG000000006315 | Tmem147  | 0.244649585 | 3.30E-06    |
| ENSMUSG00000000027958  | Rack1      | -0.239903363  | 0.048021844 | ENSMUSG000000025497  | Cdh95    | 0.312428218  | 0.00213251  | ENSMUSG000000021411  | Lrrc1    | -0.214566938  | 8.22E-10    | ENSMUSG000000028649 | Macf1    | 0.244549466 | 0.008035059 |
| ENSMUSG00000000027958  | Tp1rf2     | -0.239903575  | 2.18E-05    | ENSMUSG000000044252  | Oestp1a  | 0.312300539  | 2.72E-09    | ENSMUSG000000033735  | Ndrfp2   | -0.214432465  | 5.70E-05    | ENSMUSG000000057388 | Mpr18    | 0.244542326 | 1.75E-09    |
| ENSMUSG0000000004796   | Eloc       | -0.239815348  | 0.001657279 | ENSMUSG000000059273  | Cba1     | 0.311962558  | 0.022826698 | ENSMUSG000000050329  | Pf1a1a   | -0.213370241  | 0.001088741 | ENSMUSG000000027283 | Mprv17   | 0.244313042 | 0.000238774 |
| ENSMUSG00000000051256  | Iagn1      | -0.239774417  | 0.012640472 | ENSMUSG000000034903  | Cob1l1   | 0.311621032  | 0.002850809 | ENSMUSG000000095813  | Dpe-ps1  | -0.213041334  | 0.009631029 | ENSMUSG00000003435  | Sup5     | 0.244305525 | 0.038999003 |
| ENSMUSG000000000001289 | Pridn5     | -0.239287974  | 0.001457869 | ENSMUSG000000039741  | Cbl1     | 0.310662803  | 0.001502271 | ENSMUSG00000004562   | Argf4d4  | -0.212864696  | 0.01323804  | ENSMUSG000000002804 | Nutr14   | 0.244184688 | 6.47E-05    |
| ENSMUSG00000000026568  | Mpc2       | -0.239142846  | 3.65E-21    | ENSMUSG000000020780  | Srp68    | 0.310487875  | 0.001205993 | ENSMUSG000000025477  | Psmd13   | -0.21215724   | 0.005133579 | ENSMUSG000000048280 | Zfp738   | 0.243986459 | 0.025789335 |
| ENSMUSG00000000026568  | Mydgf      | -0.238571464  | 0.027264864 | ENSMUSG000000017478  | Zc3h18   | 0.310194448  | 0.000424422 | ENSMUSG000000039616  | Mccos    | -0.211782968  | 3.73E-07    | ENSMUSG000000058240 | Cryd1    | 0.243688131 | 3.34E-06    |
| ENSMUSG00000000028159  | Dapp1      | -0.238199325  | 0.01161518  | ENSMUSG0000000048473 | Sult6b2  | 0.310133869  | 7.86E-21    | ENSMUSG000000054277  | Argp3    | -0.210809311  | 2.87E-05    | ENSMUSG000000031217 | Etnb1    | 0.243352169 | 1.01E-05    |
| ENSMUSG00000000002730  | Ndrufa1    | -0.238057728  | 0.019880491 | ENSMUSG000000073424  | Cyp4f15  | 0.310119424  | 1.15E-05    | ENSMUSG000000023951  | Uase1    | -0.21004382   | 0.002468176 | ENSMUSG000000039304 | Tpnr1f10 | 0.243343747 | 7.99E-06    |
| ENSMUSG00000000042712  | Tcea9      | -0.238056598  | 3.37E-21    | ENSMUSG000000032572  | Col6a4   | 0.310118705  | 3.94E-06    | ENSMUSG000000048324  | Ermp1    | -0.209914329  | 0.047106589 | ENSMUSG000000025515 | Muc2     | 0.243333714 | 1.60E-33    |
| ENSMUSG00000000057762  | Gm6169     | -0.237813242  | 0.04605327  | ENSMUSG000000043673  | Kcnk3    | 0.310118457  | 9.94E-13    | ENSMUSG000000029219  | Coq2     | -0.209745755  | 0.000392006 | ENSMUSG00000019082  | Sltc25a2 | 0.24331982  | 6.08E-13    |
| ENSMUSG0000000045237   | Eola1      | -0.237204522  | 5.18E-05    | ENSMUSG000000032769  | Tpna1    | 0.310117948  | 1.73E-05    | ENSMUSG000000028988  | Ctrmbip1 | -0.209702853  | 0.013063757 | ENSMUSG000000027274 | Mkks     | 0.243309077 | 9.17E-05    |
| ENSMUSG000000000005102 | Erf2ak4    | -0.236843396  | 0.000367421 | ENSMUSG000000015714  | Cers2    | 0.309876724  | 0.02203487  | ENSMUSG00000007501   | Act1     | -0.209681306  | 1.14E-05    | ENSMUSG000000054088 | Alma4    | 0.243299717 | 0.00086035  |
| ENSMUSG00000000038845  | Pht5       | -0.23677449   | 4.52E-05    | ENSMUSG000000021957  | Tkt      | 0.309456191  | 3.72E-07    | ENSMUSG000000070003  | Sebp4    | -0.209234618  | 5.55E-05    | ENSMUSG000000001794 | Capn5    | 0.243116779 | 0.000262041 |
| ENSMUSG00000000022525  | Tbim4d     | -0.236589026  | 0.00094136  | ENSMUSG000000017830  | Dhx38    | 0.309495899  | 7.42E-19    | ENSMUSG000000050728  | Nac38    | -0.208781889  | 0.00039262  | ENSMUSG000000044393 | Dcp2     | 0.243012059 | 5.06E-18    |
| ENSMUSG00000000028858  | Aldh3b5    | -0.236347536  | 0.002794355 | ENSMUSG000000025137  | Pcyt2    | 0.309316704  | 6.88E-07    | ENSMUSG000000038803  | Ost4     | -0.208554004  | 7.60E-05    | ENSMUSG000000042293 | Gm5167   | 0.242728781 | 0.006497768 |
| ENSMUSG00000000018448  | Rars       | -0.236339125  | 0.020630866 | ENSMUSG000000079020  | Sltc45a4 | 0.309212735  | 0.002210565 | ENSMUSG000000042506  | Usp22    | -0.208413267  | 0.          |                     |          |             |             |

|                       |            |               |             |                       |           |             |             |                      |            |              |             |                     |          |             |             |
|-----------------------|------------|---------------|-------------|-----------------------|-----------|-------------|-------------|----------------------|------------|--------------|-------------|---------------------|----------|-------------|-------------|
| ENSMUSG000000054428   | Atpf1      | -0.220901396  | 2.11E-10    | ENSMUSG00000002052    | Supb6     | 0.292798413 | 0.005311537 | ENSMUSG000000031482  | Slc25a15   | -0.194730796 | 2.71E-06    | ENSMUSG000000087006 | Gm13889  | 0.229463786 | 0.028146604 |
| ENSMUSG000000015217   | Hmpb3      | -0.220458216  | 0.016029763 | ENSMUSG000000078671   | Chd2      | 0.292678639 | 0.002315008 | ENSMUSG000000027828  | Ser3       | -0.194721916 | 0.000623684 | ENSMUSG000000061111 | Mmrp1    | 0.229034787 | 0.043204363 |
| ENSMUSG00000004604    | Auh        | -0.220432111  | 1.36E-06    | ENSMUSG000000002491   | Rbm27     | 0.292675779 | 0.002400937 | ENSMUSG000000029449  | Timm44     | -0.19465321  | 0.002358505 | ENSMUSG000000033565 | Rfbx2c   | 0.228874202 | 0.002194184 |
| ENSMUSG000000028675   | Pmnc2      | -0.220178581  | 0.002683014 | ENSMUSG000000066043   | Phacd4    | 0.291725168 | 0.023651903 | ENSMUSG000000029447  | Cctb1a     | -0.194481489 | 0.002059865 | ENSMUSG000000021619 | Atg10    | 0.228615247 | 5.79E-05    |
| ENSMUSG000000009866   | Cygb1      | -0.220171458  | 6.80E-26    | ENSMUSG000000036986   | Pmi1      | 0.291706134 | 0.000474505 | ENSMUSG000000022365  | Eyl1       | -0.194180093 | 2.05E-10    | ENSMUSG000000021639 | Ptcd2    | 0.228312911 | 0.045106406 |
| ENSMUSG000000068184   | Ndrf2a2    | -0.218747549  | 0.00489906  | ENSMUSG000000083380   | Ndrb4fc   | 0.291457282 | 2.10E-16    | ENSMUSG000000027078  | Ube2f6     | -0.194158653 | 5.37E-13    | ENSMUSG000000076441 | Ass1     | 0.228090869 | 0.021738662 |
| ENSMUSG000000003694   | Cycs       | -0.218732287  | 3.64E-09    | ENSMUSG000000048546   | Tob2      | 0.29149129  | 0.00687751  | ENSMUSG000000033542  | Arhgef3    | -0.19407562  | 0.0067032   | ENSMUSG000000038084 | Opn1     | 0.227880934 | 0.026925643 |
| ENSMUSG000000001595   | Ilgf5f     | -0.218566349  | 1.49E-05    | ENSMUSG000000113204   | Gm4430    | 0.291165059 | 0.026824258 | ENSMUSG000000026672  | Optn       | -0.194049937 | 0.00106076  | ENSMUSG000000001761 | Smo      | 0.227784774 | 0.035189454 |
| ENSMUSG000000002240   | Rplk       | -0.21833409   | 0.006957318 | ENSMUSG0000000021156  | Myrm411   | 0.291036592 | 0.074844666 | ENSMUSG000000029351  | Lysmd4     | -0.19390211  | 0.02245163  | ENSMUSG000000064363 | Snr4     | 0.227748395 | 0.041189454 |
| ENSMUSG0000000024231  | Cul2       | -0.218114912  | 0.006493082 | ENSMUSG000000021868   | Ppf1f     | 0.291007446 | 1.78E-06    | ENSMUSG000000030029  | Lrig1      | -0.193821941 | 5.93E-06    | ENSMUSG000000027496 | Aurka    | 0.226987593 | 0.001659308 |
| ENSMUSG000000001713   | Shcd       | -0.217816256  | 1.41E-05    | ENSMUSG0000000031442  | Pp2f      | 0.289761062 | 9.81E-11    | ENSMUSG000000020545  | Pdlm2c     | -0.193654943 | 0.022628139 | ENSMUSG000000053239 | Gad3a    | 0.226801593 | 0.0001302   |
| ENSMUSG0000000022680  | Pdxd1c     | -0.2177706023 | 0.004589407 | ENSMUSG0000000021895  | Arhgef3f  | 0.289391434 | 4.71E-13    | ENSMUSG000000021884  | Hac1       | -0.193499399 | 0.001978751 | ENSMUSG000000045983 | Efr4g1   | 0.226480709 | 0.008852901 |
| ENSMUSG0000000002232  | Pdk3       | -0.21604257   | 1.52E-06    | ENSMUSG0000000079215  | Zfp664    | 0.289114076 | 8.11E-05    | ENSMUSG000000021984  | Dmbt1      | -0.193491311 | 1.62E-10    | ENSMUSG000000024247 | Pkcdx    | 0.226412182 | 0.024420475 |
| ENSMUSG0000000028024  | Enpep      | -0.216008399  | 1.52E-36    | ENSMUSG000000039220   | Ppp1r10   | 0.289037605 | 0.001025232 | ENSMUSG000000025366  | Eyaf1      | -0.193460873 | 0.03367502  | ENSMUSG000000069833 | Ahnak    | 0.226317873 | 6.47E-05    |
| ENSMUSG00000000021196 | Pfkp       | -0.215927593  | 0.006849382 | ENSMUSG000000040843   | Brd4      | 0.288878179 | 1.05E-09    | ENSMUSG000000030610  | Det1       | -0.193010348 | 0.001473462 | ENSMUSG000000020768 | Myl6     | 0.226022999 | 4.94E-09    |
| ENSMUSG0000000022329  | Stk3       | -0.21518377   | 9.03E-19    | ENSMUSG000000025006   | Sorbs1    | 0.288333553 | 0.020694027 | ENSMUSG000000097779  | H833407H14 | -0.192360319 | 1.27E-07    | ENSMUSG000000029338 | Antr2r   | 0.225917831 | 2.14E-10    |
| ENSMUSG0000000006315  | Tmem147    | -0.215084561  | 3.30E-06    | ENSMUSG00000000040843 | Tp1       | 0.288156439 | 0.032391014 | ENSMUSG000000118038  | Gm9895     | -0.191693188 | 0.000477359 | ENSMUSG000000020768 | Mas1     | 0.225519289 | 0.006145375 |
| ENSMUSG0000000020163  | Uqor11     | -0.21482826   | 8.06E-14    | ENSMUSG000000040785   | Ttc3      | 0.287787106 | 0.0140909   | ENSMUSG000000030607  | Pik1       | -0.191489559 | 3.61E-09    | ENSMUSG000000025888 | Lpar1    | 0.225439304 | 2.15E-08    |
| ENSMUSG00000000070327 | Rck2       | -0.214309636  | 0.00179514  | ENSMUSG000000002342   | Tmem161a  | 0.287255578 | 0.020981507 | ENSMUSG0000000118038 | Inava      | -0.191480718 | 7.16E-20    | ENSMUSG000000033660 | Snmpp200 | 0.225267381 | 0.001169991 |
| ENSMUSG00000000050804 | Bcl6s1a    | -0.214131754  | 0.001546299 | ENSMUSG000000034765   | Dusp5     | 0.287177206 | 4.29E-05    | ENSMUSG000000040188  | Scamp2     | -0.191418314 | 4.66E-11    | ENSMUSG000000029381 | Shnm3r   | 0.225241221 | 1.46E-05    |
| ENSMUSG00000000031246 | Sh3brg1    | -0.213953635  | 4.43E-14    | ENSMUSG0000000061755  | Botd1     | 0.287045524 | 5.82E-07    | ENSMUSG000000015536  | Tob1       | -0.19134591  | 4.50E-08    | ENSMUSG000000034994 | Eef2     | 0.225020124 | 1.56E-19    |
| ENSMUSG0000000042829  | 2010315B03 | -0.213757892  | 1.52E-08    | ENSMUSG000000050945   | Arhgef12  | 0.286990162 | 0.02018339  | ENSMUSG000000029030  | Tpgr1      | -0.191150146 | 0.03548192  | ENSMUSG000000035311 | Gnptab   | 0.22498957  | 9.31E-08    |
| ENSMUSG000000002373   | Parp6      | -0.213677861  | 0.013715055 | ENSMUSG000000066880   | Zfp617    | 0.28679093  | 0.004123217 | ENSMUSG000000000650  | Sra1       | -0.191108746 | 1.26E-10    | ENSMUSG000000022329 | Stk3     | 0.224807576 | 9.03E-19    |
| ENSMUSG0000000038671  | Arfp1      | -0.213577943  | 4.25E-06    | ENSMUSG000000029560   | Smn8      | 0.286547849 | 0.003735951 | ENSMUSG000000044748  | Ppp1cc1    | -0.190797717 | 0.014704092 | ENSMUSG000000019689 | Fm1      | 0.224731176 | 3.45E-13    |
| ENSMUSG0000000003323  | Rasef      | -0.213578808  | 0.029334695 | ENSMUSG000000027955   | Gask1b    | 0.286286494 | 0.001576695 | ENSMUSG000000007455  | Atm73bc    | -0.190733868 | 7.91E-07    | ENSMUSG000000036617 | Ebt4     | 0.224175595 | 2.94E-07    |
| ENSMUSG0000000021939  | Ctsb       | -0.213400675  | 5.39E-24    | ENSMUSG000000035828   | Pim3      | 0.285789838 | 0.00176905  | ENSMUSG000000042412  | Def8       | -0.190340886 | 0.003956214 | ENSMUSG000000021054 | Ggcp1    | 0.224118945 | 0.001245323 |
| ENSMUSG0000000014551  | Mps25      | -0.212973732  | 0.001012552 | ENSMUSG000000027452   | Acsl1     | 0.285364265 | 1.46E-13    | ENSMUSG000000005586  | Dcn2       | -0.190031022 | 0.022566902 | ENSMUSG000000022037 | Clyb     | 0.224074486 | 0.00321906  |
| ENSMUSG00000000044080 | S100a1     | -0.212579078  | 8.34E-29    | ENSMUSG000000037325   | Lmbtrd1   | 0.285342055 | 0.016279203 | ENSMUSG000000045165  | A4f67606   | -0.189967191 | 0.004120191 | ENSMUSG000000034875 | Nyctd1   | 0.223731763 | 0.00194646  |
| ENSMUSG000000000544   | Gpa3d3     | -0.212185662  | 0.031351547 | ENSMUSG000000036775   | Decr2     | 0.284739983 | 0.01576695  | ENSMUSG000000042925  | Pnashe2c   | -0.189340661 | 0.007549897 | ENSMUSG000000060224 | Ptprx2   | 0.223160801 | 0.030084456 |
| ENSMUSG0000000022698  | Nae5f      | -0.212007908  | 0.016708234 | ENSMUSG000000020818   | Msfad11   | 0.2843752   | 0.046810347 | ENSMUSG000000022736  | Psmel1     | -0.189133427 | 3.68E-11    | ENSMUSG000000044080 | S100a1   | 0.223034858 | 8.34E-29    |
| ENSMUSG0000000004939  | Timm44     | -0.211655467  | 4.58E-05    | ENSMUSG000000029381   | Shnm3r    | 0.283893612 | 1.46E-05    | ENSMUSG000000026039  | Sgczb2     | -0.189072961 | 0.010299812 | ENSMUSG00000004963  | Dnajq1   | 0.222936147 | 0.000550684 |
| ENSMUSG0000000038379  | Ttk        | -0.211459506  | 0.47780096  | ENSMUSG000000040483   | Xaf1      | 0.283729479 | 1.36E-20    | ENSMUSG000000039737  | Pkrip1     | -0.18890231  | 0.000281226 | ENSMUSG000000039148 | Sart1    | 0.22227877  | 0.015593789 |
| ENSMUSG00000000015673 | Rtnf213    | -0.211186986  | 0.001029581 | ENSMUSG000000039515   | Ptpa      | 0.283041299 | 0.045026029 | ENSMUSG000000015536  | Moc2c1     | -0.188879688 | 1.69E-24    | ENSMUSG000000030624 | Znf6d5   | 0.221838095 | 1.58E-09    |
| ENSMUSG000000000735   | Smm29      | -0.211184485  | 0.1302226   | ENSMUSG000000054630   | Ugt2b5    | 0.282855117 | 2.79E-50    | ENSMUSG000000040306  | Mro        | -0.188255183 | 0.012370556 | ENSMUSG000000038690 | Atpf2j   | 0.221795867 | 5.93E-12    |
| ENSMUSG0000000006219  | 2310239H08 | -0.211106694  | 4.18E-05    | ENSMUSG000000022961   | Son       | 0.282556863 | 0.047-0E    | ENSMUSG000000040310  | Edem3      | -0.188151599 | 7.53E-05    | ENSMUSG000000046836 | Brox     | 0.221547768 | 0.001925028 |
| ENSMUSG0000000018239  | Zoch1c     | -0.21089827   | 0.00991987  | ENSMUSG000000006599   | Gzf1n1    | 0.282218087 | 0.008170186 | ENSMUSG000000021024  | Psmf4      | -0.187919248 | 0.000391629 | ENSMUSG000000018677 | Slc25a39 | 0.221289615 | 0.004225507 |
| ENSMUSG00000000002493 | Trappc5a   | -0.210688226  | 0.000292422 | ENSMUSG000000063296   | Tmem117   | 0.282185236 | 6.11E-82    | ENSMUSG000000050779  | Psmc4      | -0.187904131 | 0.000123042 | ENSMUSG000000033590 | Myl5c    | 0.220998526 | 1.57E-14    |
| ENSMUSG00000000038240 | Pds2c      | -0.210431299  | 0.000457891 | ENSMUSG000000032602   | Slc25a20  | 0.282129236 | 0.031732625 | ENSMUSG000000109901  | Chmp1b     | -0.187853129 | 0.000103018 | ENSMUSG000000038668 | Lpar1    | 0.220946356 | 9.83E-09    |
| ENSMUSG0000000008242  | Cdc2c      | -0.210255209  | 0.00623582  | ENSMUSG000000028158   | Mtp2      | 0.282064656 | 3.05E-19    | ENSMUSG000000036781  | Chmp1b1    | -0.187607996 | 0.000498526 | ENSMUSG000000049960 | Mpsr16   | 0.220909191 | 3.31E-13    |
| ENSMUSG0000000007680  | Lamtor5    | -0.210038483  | 0.008556454 | ENSMUSG000000018076   | Bclt3l    | 0.281665523 | 5.81E-11    | ENSMUSG000000026417  | Pigr       | -0.187599113 | 2.07E-14    | ENSMUSG000000020003 | Pex7     | 0.220788564 | 0.00490301  |
| ENSMUSG00000000085421 | 4732409B19 | -0.209784301  | 0.01770709  | ENSMUSG000000029802   | Bet1      | 0.281621022 | 5.52E-20    | ENSMUSG000000025298  | Cdc24a2e2  | -0.187503525 | 0.028516241 | ENSMUSG000000025509 | Ppnla2   | 0.220714491 | 0.008168715 |
| ENSMUSG0000000017950  | Hnf4a      | -0.208888424  | 2.51E-11    | ENSMUSG000000031488   | Rab11fp1a | 0.281201328 | 1.33E-08    | ENSMUSG000000032562  | Astf1      | -0.186852934 | 0.029595898 | ENSMUSG000000032065 | Tex12    | 0.220555898 | 0.000201348 |
| ENSMUSG0000000005561  | Mpr32      | -0.208727671  | 1.29E-06    | ENSMUSG000000022892   | App       | 0.281037554 | 5.19E-27    | ENSMUSG000000040975  | Manea      | -0.186801977 | 4.65E-05    | ENSMUSG000000019975 | Pgs17    | 0.220439287 | 0.00567803  |
| ENSMUSG0000000025551  | Uqcr1c     | -0.208297173  | 4.38E-07    | ENSMUSG000000033557   | Fam20b    | 0.280799395 | 6.83E-05    | ENSMUSG000000028693  | Nasip      | -0.186812293 | 0.00165444  | ENSMUSG000000030428 | Gy14     | 0.220198829 | 0.010275434 |
| ENSMUSG0000000003261  | Mrap1      | -0.208122461  | 2.65E-13    | ENSMUSG000000059447   | Hadhb     | 0.280784892 | 6.00E-06    | ENSMUSG000000028693  | Fut1       | -0.186775192 | 0.010643215 | ENSMUSG000000057006 | Tgha     | 0.220026698 | 0.014690733 |
| ENSMUSG00000000039643 | Picb4      | -0.208032696  | 0.04824816  | ENSMUSG000000083837   | Gkl14427  | 0.280494922 | 0.000994978 | ENSMUSG000000019982  | Myb        | -0.186392213 | 1.62E-10    | ENSMUSG000000036687 | Tmem184a | 0.219821509 | 0.031247801 |
| ENSMUSG000000000555   | Naxd       | -0.207771066  | 0.04834853  | ENSMUSG000000022094   | Slc39a14  | 0.280469124 | 3.38E-13    | ENSMUSG000000027367  | Ndnaf9     | -0.185769229 | 1.52E-16    | ENSMUSG000000039607 | Rtp      | 0.219582226 | 0.000288229 |
| ENSMUSG0000000021500  | Dxd4c      | -0.207598187  | 2.26E-05    | ENSMUSG000000058454   | Dhr7      | 0.280417809 | 0.001294384 | ENSMUSG000000026922  | Agpat2     | -0.185613086 | 7.57E-05    | ENSMUSG000000023913 | Plag7    | 0.219208499 | 0.00262075  |
| ENSMUSG0000000003891  | Hadh11b2   | -0.207415111  | 1.85E-05    | ENSMUSG000000059775   | Rps26-ps1 | 0.280335368 | 0.0018358   | ENSMUSG00000005362   | Birc7      | -0.185263666 | 0.001685219 | ENSMUSG000000028920 | Fbw42c   | 0.219126595 | 0.007848567 |
| ENSMUSG0000000004913  | Lp5        | -0.207264267  | 0.042971842 | ENSMUSG000000020955   | Ap4s1     | 0.280171131 | 0.04089426  | ENSMUSG000000038528  | Hmhd4b5    | -0.184935624 | 0.01070431  | ENSMUSG000000027422 | Rtp5     | 0.219008023 | 1.10E-06    |
| ENSMUSG00000000034016 | Slc6a2d    | -0.207238261  | 0.03195251  | ENSMUSG000000030718   | Ppmel1    | 0.280129539 | 0.00612051  | ENSMUSG000000000     |            |              |             |                     |          |             |             |

|                      |                      |               |             |
|----------------------|----------------------|---------------|-------------|
| ENSMUSG00000033318   | Gatt2                | -0.193807956  | 3.78E-09    |
| ENSMUSG000000018417  | Myo1b                | -0.193509105  | 0.000134267 |
| ENSMUSG000000022428  | Atpa5a1              | -0.193224228  | 1.80E-33    |
| ENSMUSG000000025917  | Cops5                | -0.193072565  | 0.000612087 |
| ENSMUSG000000005459  | Atptv1a              | -0.192891771  | 8.19E-05    |
| ENSMUSG000000014254  | Ortd5                | -0.192761148  | 0.027736522 |
| ENSMUSG000000022551  | Cyc1                 | -0.192529497  | 2.09E-16    |
| ENSMUSG000000007941  | Csps-ps              | -0.192246264  | 3.94E-19    |
| ENSMUSG000000019902  | Npx2                 | -0.191978415  | 0.00035654  |
| ENSMUSG000000018858  | Mpr5f8               | -0.191819795  | 3.01E-09    |
| ENSMUSG000000004459  | Ifri1                | -0.191790481  | 7.04E-10    |
| ENSMUSG000000023944  | Hsp90ab1             | -0.191656668  | 0.000277912 |
| ENSMUSG0000000042369 | Rbm45                | -0.191535852  | 0.000636341 |
| ENSMUSG000000038195  | Rlp                  | -0.191506028  | 3.61E-05    |
| ENSMUSG0000000022280 | Ciao3                | -0.191441969  | 0.024837667 |
| ENSMUSG000000004148  | Utp4                 | -0.191328256  | 0.037281104 |
| ENSMUSG0000000001237 | Ctsl                 | -0.191293717  | 1.12E-32    |
| ENSMUSG0000000049960 | Mpsr16               | -0.191263154  | 3.31E-13    |
| ENSMUSG0000000030225 | Dera                 | -0.190954673  | 1.50E-06    |
| ENSMUSG0000000027219 | Cs12ba2              | -0.190313729  | 1.02E-17    |
| ENSMUSG000000000363  | Pcdcl21              | -0.190265021  | 0.001774511 |
| ENSMUSG000000004143  | Tmc04                | -0.190233636  | 3.70E-06    |
| ENSMUSG000000003879  | Mpr17                | -0.190148994  | 1.06E-09    |
| ENSMUSG000000004899  | Papes2               | -0.189711812  | 8.85E-35    |
| ENSMUSG000000002499  | Pras2                | -0.189360706  | 0.13025011  |
| ENSMUSG000000003551  | Elr3                 | -0.189159639  | 0.13686283  |
| ENSMUSG000000009059  | Pou2af3              | -0.188925881  | 0.00032109  |
| ENSMUSG0000000042711 | My12a                | -0.188850362  | 0.025182037 |
| ENSMUSG000000002048  | Hga6                 | -0.188565021  | 0.007254523 |
| ENSMUSG000000005539  | Elof                 | -0.187935448  | 0.019982045 |
| ENSMUSG000000003524  | Cacnb3               | -0.187654486  | 3.59E-05    |
| ENSMUSG000000030704  | Rab6a                | -0.186898956  | 7.72E-13    |
| ENSMUSG000000012852  | Rab15                | -0.186897151  | 1.58E-10    |
| ENSMUSG000000009834  | Arfge3               | -0.186879952  | 3.97E-23    |
| ENSMUSG000000012864  | Dcaf12               | -0.186874798  | 0.162550059 |
| ENSMUSG000000030663  | 1110004F10           | -0.186810217  | 0.006796763 |
| ENSMUSG000000004418  | Tmfrs2               | -0.186745826  | 0.000162157 |
| ENSMUSG000000000477  | Tpm                  | -0.186640821  | 4.65E-06    |
| ENSMUSG000000006639  | Ecit                 | -0.186378486  | 4.68E-08    |
| ENSMUSG0000000026510 | Tp53bp2              | -0.186244578  | 0.04525241  |
| ENSMUSG000000002432  | Pcna                 | -0.185525163  | 0.000916739 |
| ENSMUSG000000003287  | Tbcl1                | -0.185343428  | 0.000697929 |
| ENSMUSG000000002698  | BCO3181              | -0.185196466  | 3.55E-07    |
| ENSMUSG0000000056941 | Commf2               | -0.185012127  | 0.060174153 |
| ENSMUSG000000002567  | Aste1                | -0.184771044  | 0.029599358 |
| ENSMUSG000000004216  | Sgsm1                | -0.184761347  | 0.021540684 |
| ENSMUSG0000000032413 | Rsa2                 | -0.184692619  | 0.011202067 |
| ENSMUSG000000002961  | Oae2                 | -0.184680699  | 1.51E-06    |
| ENSMUSG000000009041  | Omdm1                | -0.184539494  | 3.82E-05    |
| ENSMUSG000000014856  | Trim208              | -0.184297125  | 3.45E-07    |
| ENSMUSG000000004313  | Crrpa                | -0.184093042  | 0.006959974 |
| ENSMUSG0000000047638 | Nrl14                | -0.184046786  | 0.005000842 |
| ENSMUSG0000000038683 | Pak1p1               | -0.184041671  | 4.49E-06    |
| ENSMUSG000000002978  | Naa3b                | -0.183804516  | 0.00039526  |
| ENSMUSG000000002894  | Ippb5                | -0.183645415  | 3.21E-06    |
| ENSMUSG0000000034566 | Atp5h                | -0.183635328  | 1.36E-11    |
| ENSMUSG0000000021379 | Id1                  | -0.18328424   | 0.02008176  |
| ENSMUSG000000002076  | Dxd5                 | -0.182891108  | 0.002555971 |
| ENSMUSG00000000110   | Cntrl                | -0.182344303  | 0.000595133 |
| ENSMUSG000000002675  | Lmb2                 | -0.181953779  | 0.00377289  |
| ENSMUSG000000013527  | Cpxx                 | -0.181433277  | 0.005468322 |
| ENSMUSG00000002469   | Tpx2                 | -0.181193258  | 2.29E-07    |
| ENSMUSG0000000025255 | Apol                 | -0.181142569  | 8.05E-06    |
| ENSMUSG000000016534  | Lamp2                | -0.180840403  | 3.18E-06    |
| ENSMUSG000000003216  | Sptlc2               | -0.180505126  | 0.10630951  |
| ENSMUSG000000002267  | Hmt1                 | -0.180408179  | 1.08E-09    |
| ENSMUSG000000002477  | Accl                 | -0.180323166  | 5.10E-11    |
| ENSMUSG000000002652  | Igfb1bp1             | -0.180137845  | 0.00173483  |
| ENSMUSG000000003914  | Csq10a               | -0.180042024  | 0.018226652 |
| ENSMUSG0000000025781 | Atp                  | -0.179816902  | 6.29E-11    |
| ENSMUSG0000000037373 | Ctbp1                | -0.179479925  | 3.50E-05    |
| ENSMUSG0000000022820 | Nutrl4               | -0.179306817  | 1.71E-10    |
| ENSMUSG000000008461  | Cdc10r1              | -0.179078667  | 1.42E-12    |
| ENSMUSG000000002415  | Pglf                 | -0.178882851  | 0.010522271 |
| ENSMUSG0000000031878 | Nae1                 | -0.178842333  | 2.64E-07    |
| ENSMUSG0000000035451 | Foxh1                | -0.178362422  | 1.28E-13    |
| ENSMUSG0000000062169 | Cn1a                 | -0.178342233  | 8.41E-09    |
| ENSMUSG0000000041215 | ENSMUSG0000000041215 | -0.178246664  | 0.022893675 |
| ENSMUSG0000000061518 | Cox5b                | -0.178072762  | 8.93E-15    |
| ENSMUSG0000000074261 | Erich4               | -0.177977616  | 1.72E-09    |
| ENSMUSG0000000022673 | Mnm4                 | -0.177711715  | 0.003174862 |
| ENSMUSG0000000075701 | Selmos               | -0.177161532  | 0.00031883  |
| ENSMUSG0000000055976 | Cldn23               | -0.177054963  | 0.000421334 |
| ENSMUSG0000000033938 | Nutrl7               | -0.176993096  | 4.63E-14    |
| ENSMUSG0000000026154 | Schd4f1              | -0.176984049  | 6.99E-07    |
| ENSMUSG0000000032299 | Commf4               | -0.176789203  | 0.026522244 |
| ENSMUSG0000000021051 | Ppp2r25a             | -0.176662961  | 0.013515925 |
| ENSMUSG0000000028063 | Lrma                 | -0.176646742  | 1.46E-12    |
| ENSMUSG0000000000001 | Gna3                 | -0.176459325  | 0.007755676 |
| ENSMUSG000000002768  | Larp7                | -0.176274363  | 8.43E-05    |
| ENSMUSG0000000069516 | Ly22                 | -0.175722585  | 0.015095697 |
| ENSMUSG0000000043501 | Lga5e2               | -0.175225242  | 0.035681706 |
| ENSMUSG000000005627  | Gpdl1                | -0.175211879  | 1.92E-09    |
| ENSMUSG0000000038673 | 2410004B18           | -0.175114416  | 0.020113941 |
| ENSMUSG0000000052214 | Opa3                 | -0.174870905  | 0.009646511 |
| ENSMUSG0000000026605 | Cenpf                | -0.174647858  | 2.84E-07    |
| ENSMUSG0000000024150 | Mcd                  | -0.17447581   | 1.88E-09    |
| ENSMUSG0000000004815 | Dgkq                 | -0.174452727  | 1.37E-06    |
| ENSMUSG0000000038717 | Atp5l                | -0.173827281  | 1.88E-09    |
| ENSMUSG0000000030335 | Mpr15f1              | -0.173775813  | 0.010885329 |
| ENSMUSG0000000050513 | Wdr1                 | -0.173561449  | 5.48E-20    |
| ENSMUSG0000000022554 | Hcx1                 | -0.173406442  | 0.017104211 |
| ENSMUSG0000000046516 | Cox17                | -0.173216455  | 9.27E-07    |
| ENSMUSG0000000020782 | Lig2                 | -0.173122143  | 0.000617831 |
| ENSMUSG000000018379  | Sra1                 | -0.172319426  | 7.87E-08    |
| ENSMUSG0000000021484 | Lrma2                | -0.172258331  | 0.005513403 |
| ENSMUSG000000007815  | Rhoa                 | -0.172144174  | 0.007261257 |
| ENSMUSG0000000022124 | Fbx3                 | -0.172075941  | 0.000823024 |
| ENSMUSG0000000037788 | Vopp1                | -0.172030311  | 2.22E-23    |
| ENSMUSG0000000039013 | Siglecf              | -0.171935137  | 9.07E-06    |
| ENSMUSG0000000041203 | Tfr1                 | -0.171612629  | 0.025844537 |
| ENSMUSG0000000049550 | Cldp1                | -0.1711714037 | 4.45E-05    |
| ENSMUSG0000000038822 | Hace1                | -0.171057183  | 0.022671839 |
| ENSMUSG0000000070338 | Mpr49                | -0.170992498  | 2.28E-05    |
| ENSMUSG0000000019966 | Kti1                 | -0.170992172  | 1.32E-07    |
| ENSMUSG0000000025411 | Hchd2                | -0.170770953  | 9.66E-06    |
| ENSMUSG0000000032915 | Adgr4f               | -0.170777993  | 0.016489501 |
| ENSMUSG0000000021319 | Gmt0498              | -0.170777491  | 0.048865101 |
| ENSMUSG0000000079055 | Sclab3a              | -0.17077685   | 0.018018601 |
| ENSMUSG000000003762  | Sclt1ad9             | -0.170776735  | 0.01527026  |
| ENSMUSG0000000075322 | Amr1                 | -0.170775731  | 0.002123934 |
| ENSMUSG0000000026355 | Mcm6                 | -0.170597985  | 0.002640015 |

|                      |           |              |             |
|----------------------|-----------|--------------|-------------|
| ENSMUSG000000009907  | Vps4b     | 0.261789221  | 0.00241387  |
| ENSMUSG0000000052040 | Klf13     | 0.261786712  | 1.25E-09    |
| ENSMUSG0000000039148 | Sart1     | 0.261775971  | 0.015593789 |
| ENSMUSG0000000042377 | Farn3g3   | 0.261392141  | 1.29E-06    |
| ENSMUSG0000000032525 | Nktr      | 0.261388227  | 0.01401643  |
| ENSMUSG0000000021474 | Sfrn1     | 0.261192573  | 9.27E-08    |
| ENSMUSG0000000067942 | Tp1160    | 0.260582405  | 0.019310557 |
| ENSMUSG0000000061536 | Scll2c    | 0.260302561  | 1.71E-09    |
| ENSMUSG0000000032349 | Eccw5     | 0.260271596  | 7.01E-23    |
| ENSMUSG0000000038371 | Sbr2      | 0.260185223  | 0.042758846 |
| ENSMUSG0000000030534 | Vps33b    | 0.260108745  | 0.001944919 |
| ENSMUSG000000004748  | Mtrp1     | 0.259810656  | 1.05E-15    |
| ENSMUSG0000000078439 | Smm24     | 0.259630751  | 9.16E-82    |
| ENSMUSG0000000034472 | Rac2d     | 0.259556617  | 3.65E-07    |
| ENSMUSG0000000020229 | Scl5a4a   | 0.259509945  | 2.13E-08    |
| ENSMUSG0000000020074 | Ccar1     | 0.259469631  | 4.54E-08    |
| ENSMUSG0000000035642 | Aamd      | 0.259430559  | 4.28E-15    |
| ENSMUSG0000000059316 | Scl27a4   | 0.259404318  | 0.004555358 |
| ENSMUSG0000000002229 | Scl5a4a   | 0.259394785  | 6.11E-13    |
| ENSMUSG0000000046897 | Zp1740    | 0.259166945  | 0.041346824 |
| ENSMUSG0000000028145 | Hmt4      | 0.258613624  | 2.27E-11    |
| ENSMUSG0000000038059 | Smm3      | 0.258441781  | 0.012399983 |
| ENSMUSG0000000030759 | Gms       | 0.258419154  | 0.009191914 |
| ENSMUSG0000000022433 | Cenkt1e   | 0.258245186  | 0.042765575 |
| ENSMUSG0000000031592 | Pcm1      | 0.257148976  | 0.029111454 |
| ENSMUSG0000000023829 | Scl22a1   | 0.257046196  | 1.25E-15    |
| ENSMUSG0000000015405 | Ace2      | 0.256636649  | 0.012112557 |
| ENSMUSG0000000026398 | Nrs2a     | 0.255947461  | 3.09E-20    |
| ENSMUSG0000000021772 | Nkxras1   | 0.255836862  | 1.04E-14    |
| ENSMUSG0000000029851 | Tcaf2     | 0.255775563  | 0.00341819  |
| ENSMUSG0000000027035 | Cers6     | 0.255513238  | 0.000509931 |
| ENSMUSG000000015305  | Sash1     | 0.255177559  | 0.000119653 |
| ENSMUSG0000000031839 | Hsbp1     | 0.2549632    | 0.000367421 |
| ENSMUSG0000000031714 | Gat1      | 0.254837282  | 0.001807602 |
| ENSMUSG0000000001151 | Pont      | 0.254360979  | 7.28E-10    |
| ENSMUSG0000000037106 | Fer11e    | 0.254195151  | 9.54E-10    |
| ENSMUSG0000000039835 | Nhs1      | 0.254098402  | 6.04E-05    |
| ENSMUSG0000000033392 | Clyap2    | 0.253955758  | 0.001063144 |
| ENSMUSG0000000029860 | Cyp       | 0.253813732  | 0.004059296 |
| ENSMUSG0000000025165 | Sectm1a   | 0.253661125  | 2.24E-10    |
| ENSMUSG0000000032741 | Tpmc1     | 0.253651255  | 0.000253703 |
| ENSMUSG0000000029439 | Sfwap     | 0.253346163  | 0.00012149  |
| ENSMUSG0000000037031 | Tspan15   | 0.253257867  | 0.002190759 |
| ENSMUSG0000000030096 | Scl6a6    | 0.252991503  | 3.31E-11    |
| ENSMUSG0000000025401 | Myo1a     | 0.252666692  | 1.32E-07    |
| ENSMUSG0000000038909 | Kat7      | 0.252484711  | 0.021533336 |
| ENSMUSG0000000033047 | Erf1      | 0.252429923  | 0.022767532 |
| ENSMUSG0000000039633 | Lomr1f    | 0.252358356  | 0.00415548  |
| ENSMUSG0000000020532 | Acaca     | 0.252014063  | 1.71E-05    |
| ENSMUSG0000000035992 | Frip1     | 0.251777487  | 0.000196979 |
| ENSMUSG0000000078317 | F8a       | 0.2515772007 | 0.010305562 |
| ENSMUSG0000000027946 | Ptgr2     | 0.2511750584 | 1.26E-12    |
| ENSMUSG0000000020864 | Ankr4d0   | 0.250916197  | 0.000826085 |
| ENSMUSG0000000020209 | Nudt4     | 0.250426714  | 5.09E-36    |
| ENSMUSG000000019362  | DBErt738e | 0.250261296  | 0.000800747 |
| ENSMUSG0000000024091 | Vpa       | 0.249839828  | 5.53E-10    |
| ENSMUSG0000000022973 | Symj1     | 0.24974493   | 0.005459893 |
| ENSMUSG0000000056665 | Them6     | 0.249491912  | 0.032125241 |
| ENSMUSG0000000036120 | Rfxank    | 0.249371274  | 0.034538216 |
| ENSMUSG0000000029189 | Sel113    | 0.249230231  | 6.42E-14    |
| ENSMUSG0000000042293 | Gme517    | 0.248958631  | 0.006497768 |
| ENSMUSG0000000036499 | Eos1      | 0.248245647  | 7.22E-10    |
| ENSMUSG0000000032652 | Creb2     | 0.248194794  | 0.010485435 |
| ENSMUSG0000000076431 | Sow4      | 0.248056776  | 3.39E-15    |
| ENSMUSG0000000025280 | Polr3a    | 0.247999738  | 0.000337974 |
| ENSMUSG0000000039157 | Eelg1     | 0.247888854  | 0.004968145 |
| ENSMUSG0000000002275 | Trim25    | 0.247755029  | 0.001877963 |
| ENSMUSG0000000039473 | Ubn1      | 0.247453589  | 4.89E-08    |
| ENSMUSG0000000033542 | Arhgef5   | 0.247410947  | 0.0007032   |
| ENSMUSG000000011752  | Pgm1      | 0.246625608  | 0.000128523 |
| ENSMUSG0000000036120 | Rfxank    | 0.246595181  | 0.000345518 |
| ENSMUSG0000000061859 | Ptj2      | 0.246566336  | 1.11E-05    |
| ENSMUSG0000000048277 | Symg2     | 0.246551279  | 1.24E-07    |
| ENSMUSG0000000032411 | Tfcp2l1   | 0.246119777  | 0.036600532 |
| ENSMUSG0000000037887 | Dusp2     | 0.246118229  | 0.019422022 |
| ENSMUSG0000000024404 | Rck3      | 0.245632123  | 0.01218359  |
| ENSMUSG0000000110841 | Cyp4a-ps2 | 0.245609316  | 2.81E-48    |
| ENSMUSG0000000037166 | Atp13a1   | 0.245600175  | 0.025108957 |
| ENSMUSG0000000038828 | Vps13b    | 0.245593708  | 8.28E-07    |
| ENSMUSG0000000045316 | Trimc14   | 0.245464729  | 0.00019444  |
| ENSMUSG0000000030516 | Fahd1     | 0.245426774  | 1.74E-24    |
| ENSMUSG0000000030516 | Tjp1      | 0.244956951  | 0.000102727 |
| ENSMUSG0000000068299 | Rasg2     | 0.244907482  | 0.016803978 |
| ENSMUSG0000000040365 | Nat84     | 0.244851734  | 0.000486813 |
| ENSMUSG0000000058230 | Trimr1    | 0.244641149  | 0.000323910 |
| ENSMUSG0000000047731 | Argap35   | 0.24455333   | 6.39E-05    |
| ENSMUSG0000000000826 | Dnqcs5    | 0.243922538  | 0.000681533 |
| ENSMUSG0000000040459 | Argu1a    | 0.243651868  | 9.87E-06    |
| ENSMUSG0000000026530 | Hdm5      | 0.242755624  | 0.001828602 |
| ENSMUSG0000000032827 | Trimc19   | 0.242753327  | 1.36E-06    |
| ENSMUSG0000000032827 | Pp1a1r8a  | 0.242546299  | 0.000412672 |
| ENSMUSG0000000035621 | Dnq6b     | 0.242243402  | 0.007864052 |
| ENSMUSG000000005980  | Midn      | 0.242231013  | 1.06E-11    |
| ENSMUSG0000000028010 | Dnae1     | 0.241732776  | 3.55E-08    |
| ENSMUSG0000000062014 | Gmb3      | 0.241328314  | 0.007362687 |
| ENSMUSG0000000024119 | Pmr1a     | 0.24132102   | 0.00074475  |
| ENSMUSG0000000020426 | Rck1      | 0.241218539  | 1.94E-26    |
| ENSMUSG0000000021589 | Phd23     | 0.241008913  | 2.30E-30    |
| ENSMUSG0000000024292 | Cyp41a    | 0.240884461  | 0.000102466 |
| ENSMUSG0000000033326 | Kdm14     | 0.240676536  | 1.43E-05    |
| ENSMUSG0000000040225 | Grnc2     | 0.24014822   | 3.93E-07    |
| ENSMUSG0000000022286 | Hrp2      | 0.239963788  | 0.031809287 |
| ENSMUSG0000000015656 | Lspab     | 0.239678783  | 0.000460382 |
| ENSMUSG0000000028080 | Ha3a      | 0.239675173  | 0.019730174 |
| ENSMUSG0000000030810 | Trim24    | 0.239527714  | 2.01E-07    |
| ENSMUSG0000000048007 | Matm1     | 0.239497099  | 0.001773946 |
| ENSMUSG0000000030375 | Snpa1     | 0.239376934  | 9.92E-05    |
| ENSMUSG000000012535  | Trimc3    | 0.239028656  | 0.007697926 |
| ENSMUSG0000000039304 | Trif1f10  | 0.239015403  | 7.99E-06    |
| ENSMUSG0000000035473 | Gemin7    | 0.238560301  | 0.000445985 |
| ENSMUSG000000005672  | Galn      | 0.238319732  | 1.13E-38    |
| ENSMUSG0000000017760 | Kit       | 0.238124681  | 5.71E-09    |
| ENSMUSG0000000045098 | Ctla      | 0.238046361  | 0.032549775 |
| ENSMUSG0000000025786 | Kmt5b     | 0.237342462  | 0.003462774 |
| ENSMUSG0000000036975 | Zdhc3     | 0.237285632  | 0.000622699 |
| ENSMUSG0000000051339 | Trim77    | 0.237182862  | 0.000369822 |
| ENSMUSG0000000065979 | Magp26a02 | 0.237091086  | 1.75E-12    |
| ENSMUSG0000000050552 | Prk2      | 0.236844674  | 2.42E-05    |
|                      | Cpmed1    | 0.236702426  | 1.43E-12    |
|                      | Lamrt04   | 0.236350254  | 0.00744015  |

|                      |           |              |             |                      |            |             |              |                     |           |              |             |                     |           |             |             |
|----------------------|-----------|--------------|-------------|----------------------|------------|-------------|--------------|---------------------|-----------|--------------|-------------|---------------------|-----------|-------------|-------------|
| ENSMUSG00000023045   | Soa#2     | -0.170548581 | 0.010575628 | ENSMUSG00000022957   | Itsn#1     | 0.236083206 | 4.70E-05     | ENSMUSG00000060073  | Pma#3     | -0.148884291 | 0.00354068  | ENSMUSG00000020706  | Ftj#3     | 0.182969665 | 0.00242027  |
| ENSMUSG00000030275   | Igf#9b    | -0.170533731 | 1.74E-06    | ENSMUSG00000001362   | Shn#1      | 0.235914586 | 0.00406384   | ENSMUSG00000020888  | Dv#2      | -0.148766722 | 0.002847561 | ENSMUSG00000026638  | Irh#6     | 0.182904262 | 0.002084516 |
| ENSMUSG00000002888   | Dv#2      | -0.170454308 | 0.002847561 | ENSMUSG000000034681  | Rpns#1     | 0.23579621  | 0.00303846   | ENSMUSG000000038217 | Tl#cd2    | -0.148675674 | 1.54E-11    | ENSMUSG00000002694  | Mynd#19   | 0.182807953 | 0.017452383 |
| ENSMUSG00000020771   | Mrp#3a    | -0.17031611  | 0.009167341 | ENSMUSG000000097145  | 9230114K1A | 0.235688219 | 0.015298951  | ENSMUSG00000002893  | Ppa#2     | -0.148403759 | 0.000654058 | ENSMUSG00000022450  | Ndk#af    | 0.182801367 | 3.8E-10     |
| ENSMUSG0000000028771 | Ppn#12    | -0.170219465 | 0.001049906 | ENSMUSG000000032403  | Z300009A05 | 0.235373717 | 0.001737794  | ENSMUSG00000002063  | Carns#ap1 | -0.147995692 | 0.036763495 | ENSMUSG00000026607  | Uhm#f     | 0.182215879 | 5.81E-05    |
| ENSMUSG000000093483  | AA#65934  | -0.169578009 | 0.003811984 | ENSMUSG000000024858  | Gm#2       | 0.235199804 | 0.002380316  | ENSMUSG00000020785  | P2n#1     | -0.147972242 | 0.014791005 | ENSMUSG00000038256  | Bol#9     | 0.18203934  | 3.82E-09    |
| ENSMUSG000000009633  | G0#2      | -0.169495363 | 0.379E-12   | ENSMUSG000000035401  | Emr#y      | 0.234656829 | 0.004905455  | ENSMUSG000000034284 | Mfd#12    | -0.147903217 | 0.024100058 | ENSMUSG00000024854  | Pcd#4     | 0.18192507  | 0.009358129 |
| ENSMUSG0000000031327 | Ch#1c     | -0.168909268 | 7.52E-14    | ENSMUSG000000034926  | Dh#r24     | 0.23434901  | 4.96E-14     | ENSMUSG00000020473  | Dpm#3     | -0.147835285 | 0.001479105 | ENSMUSG00000013662  | Ata#1     | 0.181461866 | 0.002625177 |
| ENSMUSG000000024640  | A4#       | -0.168051411 | 0.030970827 | ENSMUSG000000038178  | L3c#4a2    | 0.234147201 | 7.71E-07     | ENSMUSG000000015342 | Xk        | -0.147779999 | 0.0014041   | ENSMUSG00000059734  | Nuf#s8    | 0.181237031 | 1.56E-06    |
| ENSMUSG000000029777  | Gars      | -0.167963533 | 5.66E-05    | ENSMUSG000000061759  | Arm#t      | 0.234064852 | 8.34E-06     | ENSMUSG000000014771 | Pdc#2     | -0.147741224 | 0.032537862 | ENSMUSG00000035762  | Mem#161b  | 0.180929707 | 4.16E-07    |
| ENSMUSG000000007038  | Nu#1      | -0.167793638 | 1.01E-34    | ENSMUSG0000000028552 | Eps#15     | 0.233979455 | 0.000252564  | ENSMUSG000000038719 | Gn#2      | -0.147756881 | 0.00011614  | ENSMUSG00000079017  | H#2T72a   | 0.180313341 | 9.90E-10    |
| ENSMUSG000000022193  | Pam#b5    | -0.167790658 | 0.006524472 | ENSMUSG000000023973  | Cnp#y3     | 0.233950997 | 0.008151847  | ENSMUSG00000046367  | ND#5      | -0.147142534 | 0.00118019  | ENSMUSG000000064351 | COX#1     | 0.180154455 | 3.07E-06    |
| ENSMUSG000000003573  | Tob#1     | -0.167460889 | 4.50E-08    | ENSMUSG000000027678  | Nco#3      | 0.233877669 | 0.000879971  | ENSMUSG000000034424 | Gch#h     | -0.146772827 | 0.002277266 | ENSMUSG000000048483 | Cdc#5c    | 0.179944597 | 0.046449504 |
| ENSMUSG000000022217  | Em#9      | -0.167058862 | 9.88E-07    | ENSMUSG000000032280  | Tl#3       | 0.233749901 | 3.91E-23     | ENSMUSG000000018171 | Vmp#1     | -0.146729006 | 0.000209098 | ENSMUSG000000031163 | Glo#5     | 0.179778962 | 4.42E-28    |
| ENSMUSG000000003682  | Rap#1b    | -0.166852439 | 0.000408895 | ENSMUSG000000017376  | Nik        | 0.233584375 | 0.024814147  | ENSMUSG000000036346 | Jak#mp1   | -0.146671222 | 0.015500911 | ENSMUSG000000028565 | Nf#d      | 0.179722336 | 3.08E-08    |
| ENSMUSG000000032562  | Gna#2     | -0.166749759 | 0.001209862 | ENSMUSG000000016520  | Lrv#2      | 0.233124421 | 0.02359012   | ENSMUSG00000036777  | An#1n     | -0.146515011 | 0.003298138 | ENSMUSG00000051671  | Coa#6     | 0.179709863 | 0.000473128 |
| ENSMUSG0000000303170 | Card#10   | -0.16639821  | 0.000607797 | ENSMUSG000000041440  | Gk#5       | 0.233069197 | 0.015898488  | ENSMUSG000000027160 | Cdc#3a    | -0.14626942  | 0.00681991  | ENSMUSG00000029086  | Prm#1     | 0.179530687 | 1.95E-28    |
| ENSMUSG000000031879  | Cia#2b    | -0.166307197 | 1.21E-05    | ENSMUSG000000032624  | Am#4       | 0.232802623 | 0.001590207  | ENSMUSG000000036446 | Man#1b    | -0.146250343 | 0.009877191 | ENSMUSG00000040865  | Inf#d     | 0.179506575 | 2.90E-06    |
| ENSMUSG000000003813  | Dna#1f    | -0.166093262 | 0.039951206 | ENSMUSG000000034342  | Ccl#       | 0.232710214 | 0.00173483   | ENSMUSG000000027514 | Zp#1      | -0.146169432 | 6.98E-28    | ENSMUSG000000068284 | Uof#3     | 0.179427118 | 0.001926304 |
| ENSMUSG000000047875  | Gpr#157   | -0.165654946 | 7.74E-16    | ENSMUSG000000039910  | Cte#d2     | 0.232659873 | 0.000100871  | ENSMUSG00000308109  | Mbn#3     | -0.145939376 | 0.021126102 | ENSMUSG000000043445 | Pgp       | 0.179184606 | 1.75E-10    |
| ENSMUSG000000003573  | Lap#3     | -0.165400338 | 5.94E-07    | ENSMUSG000000030374  | Str#4      | 0.231849425 | 4.76E-05     | ENSMUSG000000015290 | Ubl#4a    | -0.145939065 | 0.029060606 | ENSMUSG000000037601 | Nme#1     | 0.179161495 | 0.007066435 |
| ENSMUSG00000002416   | Crip#t    | -0.165136798 | 8.75E-09    | ENSMUSG000000035161  | Int#5      | 0.231601855 | 0.0015084918 | ENSMUSG000000034417 | Lamp#1    | -0.145536321 | 9.09E-11    | ENSMUSG000000027200 | Sern#ad   | 0.179030819 | 0.031182239 |
| ENSMUSG000000021614  | Vcan      | -0.164967389 | 0.024836426 | ENSMUSG000000053289  | Dsd#10     | 0.23161855  | 0.001001706  | ENSMUSG000000010388 | Cam#k2d   | -0.145350722 | 2.97E-15    | ENSMUSG000000040046 | Tph#1     | 0.178775753 | 4.05E-05    |
| ENSMUSG00000005846   | Pfp#23a   | -0.164712882 | 0.000223612 | ENSMUSG000000038116  | Ph#20      | 0.231121808 | 0.012514233  | ENSMUSG00000052906  | Ubm#8     | -0.145275612 | 0.039505474 | ENSMUSG00000027173  | Dep#d2    | 0.178575377 | 0.000519127 |
| ENSMUSG000000005965  | Pde#5a    | -0.164643742 | 1.29E-20    | ENSMUSG000000042210  | Ahd#14a    | 0.230247458 | 0.00159897   | ENSMUSG00000002061  | K#t0076   | -0.144646084 | 0.004904039 | ENSMUSG000000044352 | Sow#ah    | 0.178393224 | 1.97E-23    |
| ENSMUSG000000018286  | Pam#b10   | -0.164603614 | 0.004856104 | ENSMUSG000000021843  | Kln#1      | 0.230107729 | 0.003490042  | ENSMUSG00000008523  | Gp#5      | -0.144616004 | 0.032121894 | ENSMUSG000000022437 | Sarm#50   | 0.178222347 | 0.008000815 |
| ENSMUSG000000023456  | Pot#11    | -0.164553484 | 0.049061965 | ENSMUSG000000031668  | Er#z#k3    | 0.229592734 | 0.002938906  | ENSMUSG00000079057  | Yuv#4v3   | -0.144435595 | 2.77E-11    | ENSMUSG000000039523 | Cep#104   | 0.177931137 | 0.010270784 |
| ENSMUSG000000020664  | Did       | -0.164178815 | 3.38E-17    | ENSMUSG000000051864  | Tbcd122a   | 0.22920141  | 0.00755635   | ENSMUSG00000044365  | Cxoc#4    | -0.144057128 | 3.04E-06    | ENSMUSG00000049091  | Seph#2    | 0.177870587 | 4.68E-11    |
| ENSMUSG000000002379  | Nuf#1a1   | -0.163960235 | 6.05E-11    | ENSMUSG000000044167  | Fox#1      | 0.228990626 | 0.000111502  | ENSMUSG000000026622 | Ncd#2     | -0.14401511  | 0.006035309 | ENSMUSG000000018796 | Ac#1      | 0.177259752 | 9.13E-13    |
| ENSMUSG000000034261  | Cpne#2    | -0.16375996  | 1.75E-09    | ENSMUSG000000025326  | Ube#3a     | 0.228941577 | 0.012968623  | ENSMUSG000000036199 | Nuf#d#13  | -0.143847193 | 7.31E-15    | ENSMUSG000000034947 | Tmem#106a | 0.176926225 | 0.000552727 |
| ENSMUSG000000003435  | Ndf#1p    | -0.16318626  | 0.017649881 | ENSMUSG000000026915  | Str#p      | 0.228923953 | 0.04057186   | ENSMUSG000000041881 | Nuf#d#7   | -0.143815388 | 6.97E-13    | ENSMUSG000000023387 | Brd#1     | 0.175996387 | 5.10E-07    |
| ENSMUSG000000058292  | Prr#1b    | -0.162842343 | 1.32E-05    | ENSMUSG000000032727  | Mier#3     | 0.228811088 | 0.002513061  | ENSMUSG00000070002  | Eel       | -0.143783604 | 2.63E-05    | ENSMUSG000000055044 | Pdl#m1    | 0.175914413 | 3.92E-27    |
| ENSMUSG000000003628  | L3c#30a5  | -0.162836723 | 7.92E-07    | ENSMUSG000000013662  | At#1d      | 0.228808518 | 0.006225177  | ENSMUSG000000012350 | Enf#      | -0.14365939  | 1.86E-33    | ENSMUSG000000020275 | Trm#25    | 0.175880875 | 0.001877963 |
| ENSMUSG000000014769  | Pam#b1    | -0.162123776 | 0.020113341 | ENSMUSG000000006395  | Hy#1       | 0.228679066 | 0.037292703  | ENSMUSG00000024963  | Dem#d10   | -0.143508148 | 0.037824567 | ENSMUSG000000029610 | Amp#2     | 0.175697194 | 0.137347984 |
| ENSMUSG000000051355  | Comm#d1   | -0.161900371 | 0.002227116 | ENSMUSG000000022800  | Fy#t#d1    | 0.228562004 | 0.001642739  | ENSMUSG000000040618 | Pcd#1     | -0.143488392 | 0.029080888 | ENSMUSG000000033685 | Ucp#2     | 0.175471919 | 0.437E-06   |
| ENSMUSG000000041220  | Elv#6     | -0.161596495 | 0.00055278  | ENSMUSG000000052915  | Gal#1      | 0.228277514 | 4.71E-05     | ENSMUSG000000028415 | Pa#1p     | -0.14331927  | 0.000345612 | ENSMUSG000000002078 | Scp#p1    | 0.175378713 | 3.18E-07    |
| ENSMUSG000000042424  | Insg#1    | -0.160294739 | 1.10E-14    | ENSMUSG000000037280  | Galn#2     | 0.227715066 | 0.004134099  | ENSMUSG000000018415 | Gid#4     | -0.143296972 | 0.000609393 | ENSMUSG000000048401 | Og#r      | 0.175327763 | 0.020461029 |
| ENSMUSG000000020467  | Dpy#30    | -0.160193645 | 0.007258447 | ENSMUSG000000038580  | Sct#       | 0.227673884 | 0.03383980   | ENSMUSG000000026644 | Phy#h     | -0.143256887 | 1.87E-40    | ENSMUSG000000020447 | Ngc#11t   | 0.175281324 | 1.55E-06    |
| ENSMUSG0000000508126 | Tpm#3-rs7 | -0.160049099 | 0.009164354 | ENSMUSG000000042675  | Yp#3       | 0.227453371 | 0.033812746  | ENSMUSG000000039917 | Tj#h3     | -0.143213655 | 6.69E-15    | ENSMUSG000000026343 | Ppr#3     | 0.175140852 | 9.40E-05    |
| ENSMUSG0000000041132 | Nab#2p1   | -0.159903863 | 4.44E-23    | ENSMUSG000000034258  | Fv#2       | 0.227440211 | 1.16E-21     | ENSMUSG000000038273 | Cdc#ac    | -0.143067379 | 4.63E-13    | ENSMUSG00000005698  | Ctf#      | 0.175048344 | 0.000327540 |
| ENSMUSG000000000100  | Pold#p2   | -0.159835569 | 0.000940742 | ENSMUSG000000004931  | Apr#3a     | 0.227370447 | 0.037895684  | ENSMUSG000000028418 | Cop#b2    | -0.142705352 | 0.001129268 | ENSMUSG000000055632 | Atp#5b    | 0.175045036 | 3.29E-13    |
| ENSMUSG000000000581  | C1#d      | -0.159696319 | 2.11E-05    | ENSMUSG000000032253  | Ph#p       | 0.22690756  | 1.07E-05     | ENSMUSG000000026586 | Prr#1     | -0.142679969 | 7.13E-56    | ENSMUSG000000021553 | Sic#2a3   | 0.174714403 | 0.017811691 |
| ENSMUSG0000000068391 | Chrac#1   | -0.159648676 | 6.18E-05    | ENSMUSG000000022016  | Akap#11    | 0.22668714  | 0.000294438  | ENSMUSG000000042576 | Kan#1a1   | -0.142623292 | 5.48E-07    | ENSMUSG000000022354 | Nuf#t#9   | 0.174653262 | 6.11E-13    |
| ENSMUSG000000038160  | Alg#5     | -0.159454276 | 1.37E-10    | ENSMUSG000000030138  | Bms#1      | 0.226173736 | 1.93E-05     | ENSMUSG000000036644 | Tcd#10b   | -0.14248997  | 0.000271423 | ENSMUSG000000029462 | Vp#s2     | 0.174621348 | 9.06E-05    |
| ENSMUSG000000028716  | Bud#31    | -0.158872154 | 6.22E-05    | ENSMUSG000000027787  | Nmd#3      | 0.226106204 | 0.001192768  | ENSMUSG00000012611  | Rhd#14    | -0.142416111 | 0.008355852 | ENSMUSG00000025769  | Mfd#8     | 0.174478837 | 0.02769699  |
| ENSMUSG000000013593  | Nuf#s2    | -0.158582895 | 3.61E-25    | ENSMUSG000000057342  | Sp#h#2     | 0.225272394 | 2.14E-06     | ENSMUSG000000039678 | Tcd#1d13  | -0.142386653 | 0.014029269 | ENSMUSG00000016757  | Tl#t12    | 0.174296095 | 0.001377849 |
| ENSMUSG000000025393  | Atp#5b    | -0.158397363 | 4.09E-18    | ENSMUSG000000033416  | Guc#d1     | 0.225062646 | 5.75E-07     | ENSMUSG000000001323 | Sr#       | -0.142312458 | 0.002939891 | ENSMUSG000000066839 | Ec#t      | 0.174109289 | 4.68E-08    |
| ENSMUSG0000000022184 | Fbx#4     | -0.158287849 | 0.017233301 | ENSMUSG000000042133  | P#lg       | 0.224567206 | 0.006373669  | ENSMUSG000000055732 | Vamp#8    | -0.142297354 | 3.69E-08    | ENSMUSG000000061136 | Prr#40a   | 0.17393031  | 0.11553751  |
| ENSMUSG000000004746  | Ar#4a     | -0.15827495  | 0.012867154 | ENSMUSG000000045624  | Esf#1      | 0.224071552 | 4.31E-05     | ENSMUSG000000020407 | Cdr#5     | -0.142238168 | 0.0021332   | ENSMUSG000000032254 | Prt#3     | 0.173906079 | 2.39E-06    |
| ENSMUSG000000059040  | Eno#1b    | -0.158139992 | 2.71E-20    | ENSMUSG000000034109  | Golim#4    | 0.224026132 | 2.74E-06     | ENSMUSG000000038710 | Brd#8     | -0.142120303 | 0.00310048  | ENSMUSG000000030615 | Trm#126a  | 0.173739282 | 2.34E-08    |
| ENSMUSG000000032231  | Anx#2     | -0.157822011 | 0.004462294 | ENSMUSG0000000505718 | Tlap#4     | 0.223929741 | 0.032457048  |                     |           |              |             |                     |           |             |             |

|                      |           |              |              |
|----------------------|-----------|--------------|--------------|
| ENSMUSG00000047822   | Angptl8   | -0.143827762 | 8.25E-05     |
| ENSMUSG00000061315   | Naca      | -0.143406201 | 0.022397199  |
| ENSMUSG00000040945   | Rcc2      | -0.143031255 | 2.81E-26     |
| ENSMUSG00000015013   | Trappc2l  | -0.142778899 | 9.01E-17     |
| ENSMUSG00000007812   | Tp2b55    | -0.142727699 | 0.017899446  |
| ENSMUSG00000025233   | Fabp5     | -0.142670798 | 7.23E-05     |
| ENSMUSG00000005283   | Sae1      | -0.142260474 | 0.001842466  |
| ENSMUSG00000030328   | Tmem30a   | -0.142014913 | 1.68E-11     |
| ENSMUSG00000002346   | Sec1a1b   | -0.141837418 | 1.49E-05     |
| ENSMUSG00000002642   | Pik3c2b   | -0.141789862 | 1.03E-06     |
| ENSMUSG00000002962   | Arpc1b    | -0.141613101 | 0.00369538   |
| ENSMUSG00000003247   | Stt3b     | -0.141541281 | 6.86E-07     |
| ENSMUSG00000002593   | Lyp1a1    | -0.141526245 | 4.31E-07     |
| ENSMUSG00000004237   | Pkr       | -0.141441269 | 1.49E-16     |
| ENSMUSG00000001291   | Dnajc2    | -0.14135809  | 2.51E-05     |
| ENSMUSG00000035754   | Wdr18     | -0.141197835 | 0.031528933  |
| ENSMUSG00000002050   | Tnfrd1    | -0.140672041 | 1.37E-09     |
| ENSMUSG00000000878   | Mterf2    | -0.140593534 | 9.87E-15     |
| ENSMUSG00000002351   | Cd63      | -0.140121637 | 1.98E-05     |
| ENSMUSG00000002402   | Vdac1     | -0.140021579 | 0.022825865  |
| ENSMUSG00000002192   | Atic      | -0.139894013 | 0.01177418   |
| ENSMUSG00000003511   | Elmod2    | -0.139803931 | 0.004398878  |
| ENSMUSG00000000915   | Rprt1     | -0.139515093 | 5.11E-46     |
| ENSMUSG000000022519  | Srl       | -0.139394069 | 0.009523928  |
| ENSMUSG00000005588   | Hmnpd1    | -0.139219666 | 1.83E-05     |
| ENSMUSG00000002393   | Zfp393    | -0.138827205 | 0.003742126  |
| ENSMUSG00000006825   | Pex26     | -0.13879845  | 0.04611191   |
| ENSMUSG00000005286   | Tmtt11    | -0.138787574 | 0.02944447   |
| ENSMUSG0000000313    | Ppia2     | -0.138787039 | 0.00654058   |
| ENSMUSG00000003134   | Tbcd18    | -0.138455151 | 0.005927119  |
| ENSMUSG00000002394   | Ckap2ap1  | -0.138438197 | 8.14E-06     |
| ENSMUSG000000039879  | Heca      | -0.137721785 | 5.97E-10     |
| ENSMUSG00000002346   | Pdm1      | -0.137523779 | 0.005937245  |
| ENSMUSG00000001930   | Calm3     | -0.137504425 | 0.010434852  |
| ENSMUSG00000015867   | Vps28     | -0.136151784 | 6.87E-07     |
| ENSMUSG00000005329   | Gat3a3    | -0.136073408 | 0.001302     |
| ENSMUSG00000015745   | Plekhf1   | -0.135962256 | 0.061410247  |
| ENSMUSG0000000303518 | Dusp3     | -0.135891213 | 0.011052933  |
| ENSMUSG000000073155  | Smp12     | -0.135447385 | 1.87E-16     |
| ENSMUSG00000004662   | Polr2c    | -0.135359441 | 0.003457643  |
| ENSMUSG0000000046067 | Ppr115b   | -0.135259068 | 1.29E-06     |
| ENSMUSG0000000002804 | Nudt14    | -0.134959588 | 6.47E-05     |
| ENSMUSG000000021696  | Elof7     | -0.134691497 | 1.87E-12     |
| ENSMUSG000000015290  | Ubl4a     | -0.134590431 | 0.02906066   |
| ENSMUSG000000029170  | Ephb4     | -0.134498204 | 0.013151243  |
| ENSMUSG00000001576   | Ergic1    | -0.133883279 | 7.05E-05     |
| ENSMUSG000000009549  | Srp14     | -0.133688791 | 0.00396542   |
| ENSMUSG000000026896  | Ifih1     | -0.133259271 | 1.62E-08     |
| ENSMUSG00000004727   | Cystm1    | -0.133258791 | 2.21E-16     |
| ENSMUSG000000014715  | Rip23     | -0.133137134 | 0.0034035042 |
| ENSMUSG000000024646  | Cyb5a2    | -0.133118655 | 4.24E-29     |
| ENSMUSG000000029922  | Mkln1     | -0.132877746 | 4.48E-08     |
| ENSMUSG00000000967   | Pknox1    | -0.132635093 | 0.001108449  |
| ENSMUSG0000000052151 | Pip2p     | -0.132619468 | 0.000126081  |
| ENSMUSG000000061136  | Pgr140a   | -0.132432246 | 0.011555731  |
| ENSMUSG000000008853  | Sdhb      | -0.131751585 | 5.40E-32     |
| ENSMUSG000000028572  | Hook1     | -0.131629507 | 0.005157732  |
| ENSMUSG000000078681  | Tmem3d    | -0.131449654 | 0.005099393  |
| ENSMUSG000000063171  | Rps41     | -0.13134942  | 1.14E-06     |
| ENSMUSG000000042737  | Dpm3      | -0.131133374 | 0.000175894  |
| ENSMUSG000000033105  | Los       | -0.130832059 | 0.008348828  |
| ENSMUSG000000085148  | Tnfr22hg  | -0.130810756 | 1.06E-08     |
| ENSMUSG00000002435   | Txn1l     | -0.130692785 | 0.004215918  |
| ENSMUSG000000038803  | Osta4     | -0.130623738 | 7.60E-05     |
| ENSMUSG000000039040  | Myoc5c    | -0.130570024 | 1.57E-14     |
| ENSMUSG000000019170  | Mpr24     | -0.130480707 | 6.94E-06     |
| ENSMUSG000000036373  | Galt3     | -0.13038644  | 0.020060738  |
| ENSMUSG00000030104   | Edem1     | -0.130203776 | 0.000336271  |
| ENSMUSG000000028007  | Srx7      | -0.130024728 | 4.19E-06     |
| ENSMUSG000000039677  | Crad1     | -0.130097075 | 6.07E-10     |
| ENSMUSG000000026342  | Polr1d    | -0.129722688 | 0.000774023  |
| ENSMUSG000000068895  | Nufra8    | -0.128764701 | 1.84E-10     |
| ENSMUSG000000028821  | Dap3      | -0.128759164 | 0.000913741  |
| ENSMUSG000000031314  | Taf1      | -0.128748987 | 0.006488642  |
| ENSMUSG0000000031762 | Mt2       | -0.128677558 | 0.009095458  |
| ENSMUSG000000021585  | Cast      | -0.128517994 | 2.30E-12     |
| ENSMUSG000000015094  | Npdc1     | -0.128354941 | 0.005348605  |
| ENSMUSG000000030660  | Pik3c2a   | -0.12829071  | 1.15E-10     |
| ENSMUSG000000041317  | Irgn      | -0.127825869 | 0.032945195  |
| ENSMUSG000000017778  | Coxc7c    | -0.127804113 | 1.73E-10     |
| ENSMUSG000000035000  | Dpp4      | -0.127741529 | 7.96E-12     |
| ENSMUSG000000061904  | Slc25a3   | -0.127473317 | 2.72E-18     |
| ENSMUSG000000019189  | Rnf145    | -0.127466165 | 2.64E-12     |
| ENSMUSG000000035227  | Spcc2     | -0.127285959 | 1.30E-10     |
| ENSMUSG000000027954  | Elna1     | -0.127030027 | 5.94E-08     |
| ENSMUSG000000054324  | Kcmn4     | -0.126546047 | 2.73E-10     |
| ENSMUSG000000046342  | Erm1      | -0.126526042 | 0.047106589  |
| ENSMUSG000000025397  | Ecl       | -0.126397595 | 6.22E-17     |
| ENSMUSG000000025364  | Pa2g4     | -0.126200455 | 0.013278827  |
| ENSMUSG000000033294  | Noc4l     | -0.125999737 | 0.005110189  |
| ENSMUSG00000000991   | Seprh3    | -0.125972815 | 4.68E-11     |
| ENSMUSG000000024750  | Zlfand5   | -0.125840154 | 0.00202407   |
| ENSMUSG000000046658  | Cocx5     | -0.125794739 | 0.000183961  |
| ENSMUSG000000062456  | Rplp7-ps6 | -0.125505761 | 0.001927044  |
| ENSMUSG00000004728   | Earp1     | -0.125190307 | 3.82E-13     |
| ENSMUSG00000004768   | Idh3b     | -0.125062302 | 6.30E-15     |
| ENSMUSG000000085042  | Abhd11os  | -0.124895362 | 3.50E-06     |
| ENSMUSG000000031529  | Tnks      | -0.124871271 | 0.001806529  |
| ENSMUSG000000027472  | Pdrg1     | -0.124726117 | 0.002698253  |
| ENSMUSG000000044991  | Shd1      | -0.124400442 | 0.001907013  |
| ENSMUSG00000001098   | Kctd10    | -0.124314918 | 8.45E-17     |
| ENSMUSG000000039774  | Gaint12   | -0.124301673 | 2.21E-18     |
| ENSMUSG000000021885  | Ntan1     | -0.124027869 | 0.000533334  |
| ENSMUSG000000020454  | Lapdm4    | -0.123964222 | 9.83E-07     |
| ENSMUSG000000012058  | Dtdx1     | -0.123683322 | 0.009646853  |
| ENSMUSG000000025509  | Pnp1a2    | -0.123528821 | 0.008168715  |
| ENSMUSG000000077004  | Snord89   | -0.123357056 | 1.37E-17     |
| ENSMUSG000000027637  | Rab3f3    | -0.122994158 | 8.79E-19     |
| ENSMUSG000000052962  | Mpr35     | -0.122597331 | 0.002259251  |
| ENSMUSG000000029148  | Nrbp1     | -0.122405571 | 0.001040676  |
| ENSMUSG000000023158  | Hmnpab    | -0.122383175 | 0.001352106  |
| ENSMUSG000000078546  | Zfp995    | -0.121631276 | 0.004839236  |
| ENSMUSG00000002241   | Tars      | -0.121605611 | 0.025814688  |
| ENSMUSG000000034249  | Ptph      | -0.121549257 | 0.00245171   |
| ENSMUSG000000005085  | Mmat2a1   | -0.121494196 | 0.003997208  |
| ENSMUSG000000033878  | Upr3a     | -0.121114418 | 0.014132997  |
| ENSMUSG00000002595   | Gsdmd     | -0.121076529 | 6.17E-10     |
| ENSMUSG000000024217  | Snrpc     | -0.120970791 | 0.005991799  |
| ENSMUSG000000072335  | Tuba1a    | -0.120743986 | 0.005044036  |
| ENSMUSG000000028452  | Vcp       | -0.120726798 | 5.32E-05     |
| ENSMUSG000000031278  | Acsl4     | -0.120632991 | 0.042971842  |
| ENSMUSG000000070738  | Dgkd      | -0.120405486 | 1.17E-08     |

|                      |          |             |             |
|----------------------|----------|-------------|-------------|
| ENSMUSG000000053094  | Tmem248  | 0.20714003  | 0.010951921 |
| ENSMUSG000000024073  | Birc6    | 0.207044235 | 1.62E-05    |
| ENSMUSG000000003904  | Tomm20   | 0.206468816 | 0.001496085 |
| ENSMUSG000000035064  | Fef2k    | 0.20625486  | 2.29E-09    |
| ENSMUSG000000048756  | Foxo3    | 0.206059881 | 0.000191939 |
| ENSMUSG000000024498  | Tcorg1   | 0.20587954  | 8.86E-06    |
| ENSMUSG000000028862  | Map3k6   | 0.205686977 | 3.04E-97    |
| ENSMUSG000000066036  | Ubr4     | 0.20558538  | 1.26E-05    |
| ENSMUSG000000028833  | Ncdn     | 0.20525371  | 0.004002798 |
| ENSMUSG000000032604  | Qars     | 0.205068636 | 1.36E-12    |
| ENSMUSG000000055065  | Ddx17    | 0.204922712 | 0.054545589 |
| ENSMUSG000000037519  | Pf1a1a   | 0.204319151 | 0.001088741 |
| ENSMUSG000000068686  | Cd59b    | 0.203864425 | 3.48E-07    |
| ENSMUSG000000020910  | Adpmr    | 0.203723173 | 0.000234352 |
| ENSMUSG000000039671  | Zmynd8   | 0.203212431 | 0.000408024 |
| ENSMUSG00000001242   | Npc2     | 0.202459846 | 0.022767552 |
| ENSMUSG000000032547  | Ryk      | 0.20243759  | 3.70E-17    |
| ENSMUSG000000033228  | Scaf11   | 0.201879729 | 0.000657344 |
| ENSMUSG000000018974  | Sar3     | 0.201485276 | 0.002474841 |
| ENSMUSG000000039395  | Mreg     | 0.201393161 | 1.16E-08    |
| ENSMUSG000000041782  | Lad1     | 0.201047245 | 8.38E-05    |
| ENSMUSG000000005198  | Smm11    | 0.200901082 | 0.007585796 |
| ENSMUSG000000040435  | Ppp1r15a | 0.200317216 | 0.046438592 |
| ENSMUSG000000001569  | Nom1     | 0.200168228 | 0.004336286 |
| ENSMUSG000000033629  | Hacd3    | 0.20004445  | 0.021605147 |
| ENSMUSG000000024807  | Sym1     | 0.200020051 | 8.18E-05    |
| ENSMUSG000000068587  | Mgam     | 0.199753712 | 1.43E-05    |
| ENSMUSG0000000066219 | Fblm1    | 0.199740435 | 7.40E-16    |
| ENSMUSG000000032047  | Acat1    | 0.199695805 | 1.86E-52    |
| ENSMUSG000000032288  | Imp3     | 0.199679163 | 0.000706544 |
| ENSMUSG000000020315  | Sptbn1   | 0.199625065 | 5.80E-14    |
| ENSMUSG000000056493  | Pkn1     | 0.199407546 | 0.001547124 |
| ENSMUSG000000056493  | Foxk1    | 0.199327892 | 4.27E-06    |
| ENSMUSG0000000001157 | Gmz1     | 0.199127057 | 0.011181699 |
| ENSMUSG000000040054  | Bac2a    | 0.199016695 | 0.001320004 |
| ENSMUSG000000059598  | Ephb3    | 0.198897964 | 2.22E-11    |
| ENSMUSG000000038733  | Wdr26    | 0.198732031 | 1.39E-06    |
| ENSMUSG000000050390  | G7f080   | 0.198590077 | 7.88E-08    |
| ENSMUSG000000015711  | Prune1   | 0.198209372 | 1.31E-10    |
| ENSMUSG000000000303  | Cdh1     | 0.198120218 | 1.46E-10    |
| ENSMUSG000000075520  | Mafk1d   | 0.197701525 | 7.41E-29    |
| ENSMUSG000000056938  | Acbd4    | 0.197583625 | 2.58E-14    |
| ENSMUSG000000027534  | Smx16    | 0.197376743 | 0.001584262 |
| ENSMUSG000000020621  | Rdh14    | 0.197066568 | 0.008358582 |
| ENSMUSG000000022742  | Cpxo     | 0.197048548 | 6.75E-08    |
| ENSMUSG000000032570  | Atp2c1   | 0.197032049 | 0.000233569 |
| ENSMUSG000000034621  | Qpatrch8 | 0.196776926 | 0.005990325 |
| ENSMUSG000000000394  | Gcg      | 0.196708374 | 4.31E-05    |
| ENSMUSG000000070939  | Tgfbtr3p | 0.196593843 | 0.000617831 |
| ENSMUSG000000011179  | Tcm1     | 0.196367137 | 0.00023852  |
| ENSMUSG000000066233  | Tmem42   | 0.196228952 | 4.81E-05    |
| ENSMUSG0000000026110 | Mgat4a   | 0.196173446 | 1.46E-15    |
| ENSMUSG000000054338  | Cox19    | 0.196165219 | 3.80E-05    |
| ENSMUSG000000038965  | Ube2c3   | 0.196159429 | 0.035699997 |
| ENSMUSG000000038260  | Trpm4    | 0.196158697 | 0.000332361 |
| ENSMUSG000000058301  | Upf1     | 0.195981679 | 0.029220025 |
| ENSMUSG000000030472  | Ceacam8  | 0.195450565 | 2.34E-46    |
| ENSMUSG000000029701  | Rbm28    | 0.19539449  | 0.00391872  |
| ENSMUSG000000025868  | Higd2a   | 0.195385419 | 1.37E-06    |
| ENSMUSG000000006717  | Acat13   | 0.195317548 | 7.49E-21    |
| ENSMUSG000000058006  | Mdn1     | 0.195189007 | 0.015238699 |
| ENSMUSG000000029422  | Rer2     | 0.195095986 | 0.016141346 |
| ENSMUSG000000029186  | P4k2ab   | 0.194624487 | 8.83E-10    |
| ENSMUSG000000036617  | Ela4     | 0.194376878 | 2.94E-07    |
| ENSMUSG000000025409  | Mdb6     | 0.194281444 | 0.000223559 |
| ENSMUSG000000004207  | Pasp     | 0.194176254 | 0.00021099  |
| ENSMUSG000000011960  | Ccnt1    | 0.193760296 | 0.0315752   |
| ENSMUSG000000020986  | Sec23a   | 0.193522251 | 4.23E-06    |
| ENSMUSG000000034880  | Mpr34    | 0.192799114 | 7.30E-15    |
| ENSMUSG000000046139  | Pat11    | 0.192522417 | 0.045071816 |
| ENSMUSG0000000106864 | Hg3c2    | 0.191799867 | 0.010612663 |
| ENSMUSG000000036450  | Hif1an   | 0.191755412 | 0.007579951 |
| ENSMUSG000000030748  | Ilk4r    | 0.190794902 | 0.000913741 |
| ENSMUSG000000029505  | Golga1   | 0.190657598 | 1.29E-13    |
| ENSMUSG000000022546  | Ep400    | 0.190446456 | 1.74E-10    |
| ENSMUSG000000034158  | Lrrc5    | 0.19003398  | 0.000789598 |
| ENSMUSG000000029378  | Avg1     | 0.190031385 | 0.005949944 |
| ENSMUSG000000029202  | Pdca5    | 0.190026531 | 1.18E-05    |
| ENSMUSG000000019810  | Fusea    | 0.189645523 | 1.66E-10    |
| ENSMUSG000000066256  | Mmp1     | 0.189171961 | 9.93E-09    |
| ENSMUSG000000028822  | Tmem50a  | 0.189114444 | 0.000810597 |
| ENSMUSG000000035282  | Rbm3     | 0.188868721 | 1.21E-05    |
| ENSMUSG000000025408  | Dtd3     | 0.188567103 | 6.61E-07    |
| ENSMUSG000000030934  | Pat      | 0.188514621 | 1.00E-06    |
| ENSMUSG000000036057  | Otnp23   | 0.188254505 | 0.01620851  |
| ENSMUSG000000030652  | Csq7     | 0.188054105 | 0.001296437 |
| ENSMUSG000000029629  | Cf12     | 0.18800626  | 0.03439421  |
| ENSMUSG000000009076  | Znf1     | 0.187921999 | 0.015857572 |
| ENSMUSG000000027304  | Rma5     | 0.187793222 | 7.06E-06    |
| ENSMUSG000000027555  | Car13    | 0.187732948 | 0.002240767 |
| ENSMUSG000000027800  | Mme      | 0.187605837 | 5.61E-91    |
| ENSMUSG000000078636  | Gp7336   | 0.18756901  | 6.62E-06    |
| ENSMUSG000000040297  | Suco     | 0.187398691 | 0.001290253 |
| ENSMUSG000000042202  | Sc35a2   | 0.187287256 | 0.03242209  |
| ENSMUSG000000022387  | Brd1     | 0.186867578 | 5.10E-07    |
| ENSMUSG000000014077  | Chp1     | 0.186750909 | 0.00230861  |
| ENSMUSG000000028412  | Scd4a1   | 0.186723367 | 9.08E-24    |
| ENSMUSG000000055553  | Kat1     | 0.186710051 | 0.044021187 |
| ENSMUSG000000033735  | Spr      | 0.186566567 | 1.17E-05    |
| ENSMUSG000000054309  | Cpf3     | 0.186239396 | 0.004392996 |
| ENSMUSG000000052609  | Mlhg3    | 0.186188998 | 0.000829612 |
| ENSMUSG000000006517  | Pkd      | 0.185996262 | 4.22E-05    |
| ENSMUSG000000039219  | Ar1d4b   | 0.185914396 | 0.00124607  |
| ENSMUSG000000020671  | Rab10    | 0.18584704  | 1.24E-07    |
| ENSMUSG000000032327  | Ar1d2    | 0.185670229 | 0.001533339 |
| ENSMUSG000000033767  | Tmem131  | 0.185142523 | 0.00964855  |
| ENSMUSG000000028996  | Rbp7     | 0.184654819 | 8.40E-10    |
| ENSMUSG000000025037  | Mapa     | 0.184533461 | 1.01E-18    |
| ENSMUSG000000032373  | Imp11    | 0.184468786 | 0.000311411 |
| ENSMUSG000000051469  | Zp24     | 0.184078577 | 0.001502534 |
| ENSMUSG000000032410  | Xm1      | 0.183709566 | 0.00063772  |
| ENSMUSG000000056758  | Hmg2a    | 0.18358312  | 0.013520105 |
| ENSMUSG000000050931  | Bgm2     | 0.183254657 | 0.017488323 |
| ENSMUSG000000026617  | Ern1     | 0.183190827 | 1.44E-98    |
| ENSMUSG000000030866  | Krn2     | 0.18306485  | 9.57E-10    |
| ENSMUSG000000027782  | Fmapa    | 0.182475677 | 0.00750413  |
| ENSMUSG000000020647  | Ncd      | 0.18192266  | 3.57E-07    |
| ENSMUSG000000032018  | Sc5d     | 0.181813964 | 0.03571127  |
| ENSMUSG000000031391  | L1       | 0.181271287 | 7.91E-12    |
| ENSMUSG000000050705  | U3       | 0.181178076 | 0.0481266   |
| ENSMUSG0000000104F   | U3       | 0.181178076 | 0.0481266   |

|                      |            |              |             |
|----------------------|------------|--------------|-------------|
| ENSMUSG000000034744  | Nagk       | -0.119980848 | 0.016050128 |
| ENSMUSG000000040822  | 1700123Q20 | -0.119976768 | 0.001268452 |
| ENSMUSG00000003157   | Ikabz      | -0.119728899 | 0.000385907 |
| ENSMUSG000000049089  | Ino80c     | -0.119204617 | 0.000565738 |
| ENSMUSG00000002719   | Ewsr1      | -0.119203171 | 1.61E-07    |
| ENSMUSG000000011257  | Patcp1     | -0.119173512 | 3.25E-10    |
| ENSMUSG000000006382  | Gcat       | -0.119064001 | 1.79E-25    |
| ENSMUSG000000006382  | Uqhr       | -0.118775296 | 5.82E-14    |
| ENSMUSG000000027449  | Wdrd2b     | -0.118679252 | 0.000234264 |
| ENSMUSG00000002677   | Mindy3     | -0.118624935 | 3.14E-05    |
| ENSMUSG000000033379  | Atpv0b     | -0.118150288 | 8.60E-11    |
| ENSMUSG000000022659  | Sic26a8    | -0.117912679 | 2.23E-19    |
| ENSMUSG000000003763  | Pkmo1x     | -0.117804183 | 0.000271463 |
| ENSMUSG000000032330  | Cox7a2     | -0.117795434 | 5.98E-11    |
| ENSMUSG000000029098  | Acco3      | -0.117300279 | 0.005836197 |
| ENSMUSG000000039131  | Gipc2      | -0.117256575 | 2.49E-05    |
| ENSMUSG000000007491  | Fgfh1      | -0.117236973 | 1.91E-08    |
| ENSMUSG000000047095  | Iqcc       | -0.117212758 | 0.017718245 |
| ENSMUSG000000001701  | Mlx        | -0.116761706 | 2.03E-10    |
| ENSMUSG000000020184  | Mdm2       | -0.116587942 | 1.35E-06    |
| ENSMUSG000000005891  | Tatd1n     | -0.116012288 | 0.049500279 |
| ENSMUSG000000000436  | Utp20      | -0.115987152 | 0.000279803 |
| ENSMUSG000000027642  | Pfpn2      | -0.115849986 | 2.82E-07    |
| ENSMUSG000000015461  | Atf6b      | -0.115663675 | 1.75E-05    |
| ENSMUSG000000003616  | Chmp2a     | -0.115266277 | 0.0094001   |
| ENSMUSG000000086841  | 2140006H16 | -0.114839072 | 0.001493001 |
| ENSMUSG000000002348  | Erl4e2     | -0.114490207 | 1.33E-06    |
| ENSMUSG0000000104623 | Gmf6394    | -0.114244897 | 0.001456459 |
| ENSMUSG000000002749  | Mps26      | -0.114062367 | 0.002335977 |
| ENSMUSG000000031299  | Pdha1      | -0.113958284 | 2.95E-05    |
| ENSMUSG000000003263  | Enf        | -0.11390619  | 0.005636538 |
| ENSMUSG000000008105  | Gm15427    | -0.113634418 | 0.005867786 |
| ENSMUSG000000003904  | Enf        | -0.113472333 | 0.027573307 |
| ENSMUSG000000011966  | Gmf871     | -0.113445228 | 6.94E-05    |
| ENSMUSG000000002148  | Mhfd1      | -0.113292224 | 9.26E-05    |
| ENSMUSG00000002367   | Star7d     | -0.112658080 | 0.049768829 |
| ENSMUSG000000002972  | Agf2g      | -0.112642425 | 0.008168715 |
| ENSMUSG000000025152  | Chid1      | -0.112590894 | 1.84E-07    |
| ENSMUSG000000008847  | Timm10b    | -0.112443832 | 0.000182727 |
| ENSMUSG000000015837  | Chmp2a1a   | -0.112075304 | 0.004329742 |
| ENSMUSG000000028282  | Casg8ap2   | -0.111908519 | 0.001765034 |
| ENSMUSG000000030161  | Cno7       | -0.111720287 | 0.000413512 |
| ENSMUSG0000000032051 | Fnd1       | -0.111664664 | 5.68E-12    |
| ENSMUSG0000000063275 | Hacd1      | -0.111329187 | 0.00040136  |
| ENSMUSG00000002678   | Pdd3       | -0.111292188 | 0.000358273 |
| ENSMUSG000000024553  | Pdx5       | -0.111179024 | 1.16E-28    |
| ENSMUSG000000003982  | Misp       | -0.111085343 | 0.030949149 |
| ENSMUSG000000028382  | Ptbp3      | -0.110955985 | 2.54E-10    |
| ENSMUSG000000029737  | Bspy1      | -0.11084773  | 7.67E-14    |
| ENSMUSG000000029247  | Paica      | -0.110721196 | 0.011182021 |
| ENSMUSG000000006382  | Mpr30      | -0.110616412 | 0.005098101 |
| ENSMUSG0000000039531 | Zup1       | -0.110507208 | 0.009304880 |
| ENSMUSG000000002348  | Clec4n     | -0.110258137 | 0.001097884 |
| ENSMUSG0000000032673 | Proms1     | -0.110193352 | 0.003129031 |
| ENSMUSG000000002767  | Mpr2       | -0.110154272 | 0.005032346 |
| ENSMUSG000000026927  | Enr1       | -0.110065444 | 0.008734464 |
| ENSMUSG000000006382  | Wdrd17     | -0.110039377 | 8.32E-06    |
| ENSMUSG0000000025981 | Coq10b     | -0.109948741 | 0.037733281 |
| ENSMUSG000000003982  | Ecam       | -0.109904909 | 1.57E-14    |
| ENSMUSG00000002142   | Isc2       | -0.109843893 | 1.51E-07    |
| ENSMUSG000000005674  | Nbea2      | -0.109730391 | 0.000199188 |
| ENSMUSG0000000028729 | Ebna1bp2   | -0.109567935 | 0.003057355 |
| ENSMUSG000000002872  | Lhfp2      | -0.109080548 | 5.42E-17    |
| ENSMUSG000000013523  | Bcas1      | -0.109040885 | 1.18E-19    |
| ENSMUSG0000000071188 | Cos        | -0.108812527 | 2.33E-08    |
| ENSMUSG0000000205178 | Ptk42a     | -0.108361244 | 0.000490292 |
| ENSMUSG000000029558  | Creb1      | -0.108207937 | 1.03E-06    |
| ENSMUSG000000020418  | Pgapb      | -0.108107149 | 4.85E-11    |
| ENSMUSG0000000041177 | Tp23b      | -0.107403825 | 0.000385632 |
| ENSMUSG000000029203  | Ube2k      | -0.107369892 | 0.022615484 |
| ENSMUSG0000000034473 | Sec28a     | -0.106963323 | 2.44E-05    |
| ENSMUSG000000020870  | Nae        | -0.10683728  | 0.00042001  |
| ENSMUSG00000000930   | Elo1       | -0.106781199 | 1.41E-08    |
| ENSMUSG000000003184  | Cox4i1     | -0.106753242 | 5.91E-11    |
| ENSMUSG000000030576  | Fbox45     | -0.10623105  | 0.002282152 |
| ENSMUSG000000022956  | Atf5b      | -0.105865567 | 9.09E-12    |
| ENSMUSG000000000822  | H17c       | -0.105728313 | 7.16E-09    |
| ENSMUSG000000058624  | Gds        | -0.105690502 | 4.49E-13    |
| ENSMUSG000000020181  | Rps6ka5    | -0.105230934 | 0.004120191 |
| ENSMUSG0000000034112 | Uba1c      | -0.105109704 | 2.05E-05    |
| ENSMUSG0000000040646 | Thp1       | -0.10503977  | 4.25E-05    |
| ENSMUSG0000000065990 | Aurkap1    | -0.10498315  | 2.40E-05    |
| ENSMUSG000000003926  | S28        | -0.104933296 | 0.000414242 |
| ENSMUSG00000001477   | Prep       | -0.104708434 | 0.034196222 |
| ENSMUSG000000026887  | Mrf        | -0.104399025 | 0.003103683 |
| ENSMUSG000000044881  | Cos4       | -0.103995498 | 0.005056125 |
| ENSMUSG000000022223  | Sd4        | -0.103600184 | 3.03E-09    |
| ENSMUSG000000006225  | Zfp39u1    | -0.10339966  | 0.000242749 |
| ENSMUSG000000003615  | Khi2       | -0.10302441  | 0.008322076 |
| ENSMUSG000000054777  | Arfap3     | -0.102855258 | 2.87E-05    |
| ENSMUSG000000005828  | Sdhc       | -0.102166515 | 1.88E-22    |
| ENSMUSG000000028599  | Tnfrsf1b   | -0.102115098 | 3.21E-05    |
| ENSMUSG000000028416  | Smpd2      | -0.102111816 | 0.006475576 |
| ENSMUSG000000076319  | Rab18      | -0.101932983 | 0.004754158 |
| ENSMUSG000000028416  | Bag1       | -0.101902215 | 8.64E-05    |
| ENSMUSG000000016510  | Mif3       | -0.101746539 | 2.39E-10    |
| ENSMUSG000000042349  | Ikkbe      | -0.101370508 | 2.74E-13    |
| ENSMUSG00000004185   | Bend7      | -0.101360456 | 5.39E-49    |
| ENSMUSG000000008484  | Rhod       | -0.101295856 | 4.64E-10    |
| ENSMUSG000000001105  | H20        | -0.10109267  | 1.71E-10    |
| ENSMUSG000000024661  | Fth1       | -0.100832823 | 2.60E-83    |
| ENSMUSG000000010097  | Nxf1       | -0.100835241 | 0.024420475 |
| ENSMUSG000000024754  | Cemp2      | -0.100799131 | 9.41E-05    |
| ENSMUSG000000022339  | Ebag9      | -0.100732222 | 0.040771107 |
| ENSMUSG000000006807  | Lrr75b     | -0.100154362 | 0.000550758 |
| ENSMUSG000000050173  | Mett15     | -0.10006267  | 1.90E-05    |
| ENSMUSG000000047076  | Agmat      | -0.999927341 | 4.41E-32    |
| ENSMUSG000000031097  | Tnni2      | -0.999509582 | 0.011036514 |
| ENSMUSG000000078619  | Smarc2     | -0.999307193 | 0.026897878 |
| ENSMUSG000000001794  | Capns1     | -0.999268451 | 0.000262041 |
| ENSMUSG000000045817  | Zfp362     | -0.999231441 | 0.029801642 |
| ENSMUSG000000030754  | Copb1      | -0.99914277  | 9.07E-15    |
| ENSMUSG000000029319  | Coq2       | -0.998939625 | 0.000390206 |
| ENSMUSG000000011884  | Glp        | -0.998919699 | 2.06E-18    |
| ENSMUSG000000052738  | Sudg1      | -0.99871838  | 5.48E-12    |
| ENSMUSG000000037178  | Brd8       | -0.998523014 | 0.00310048  |
| ENSMUSG000000056531  | Cdc18      | -0.99852706  | 0.004966899 |
| ENSMUSG000000023967  | Mps18a     | -0.998414522 | 0.029214919 |
| ENSMUSG000000075819  | Zlaa1      | -0.998315012 | 0.000334922 |
| ENSMUSG000000024131  | Sic1a3     | -0.998210833 | 0.014875225 |
| ENSMUSG000000037608  | Bcl2l1     | -0.998201564 | 3.71E-08    |
| ENSMUSG000000031197  | Vbp1       | -0.998177488 | 0.03445514  |

|                       |            |             |             |
|-----------------------|------------|-------------|-------------|
| ENSMUSG0000000020283  | Pex13      | 0.181011616 | 3.61E-05    |
| ENSMUSG0000000050970  | Igha       | 0.18083969  | 7.83E-06    |
| ENSMUSG0000000035770  | Dync1i2    | 0.180782919 | 0.027674198 |
| ENSMUSG0000000020721  | Helz       | 0.180775214 | 0.000968606 |
| ENSMUSG0000000024242  | Map4k3     | 0.180686163 | 0.000566118 |
| ENSMUSG0000000020072  | Pldc2      | 0.179940454 | 2.42E-24    |
| ENSMUSG0000000023845  | Plncp      | 0.179885816 | 0.000391598 |
| ENSMUSG0000000028680  | Sh3glb2    | 0.179874414 | 0.007997814 |
| ENSMUSG0000000024944  | Arf1       | 0.179778533 | 0.017726467 |
| ENSMUSG0000000028313  | Hdac4      | 0.179528286 | 0.04041388  |
| ENSMUSG000000007921   | Trapcp9    | 0.179513878 | 0.036136295 |
| ENSMUSG000000045636   | Mtus1      | 0.17944684  | 0.010166753 |
| ENSMUSG0000000001778  | Mcts1      | 0.179424858 | 1.16E-05    |
| ENSMUSG0000000030935  | Acm3       | 0.179295109 | 0.04217825  |
| ENSMUSG0000000000000  | Gm2099     | 0.178916089 | 3.38E-09    |
| ENSMUSG0000000095193  | Gm20939    | 0.178918143 | 7.54E-08    |
| ENSMUSG0000000026031  | Cflar      | 0.17782192  | 0.047840264 |
| ENSMUSG000000029249   | Rest       | 0.177771281 | 2.01E-06    |
| ENSMUSG0000000027285  | Hauz2      | 0.176946646 | 0.000339794 |
| ENSMUSG0000000030865  | Chp2       | 0.177443587 | 7.62E-24    |
| ENSMUSG0000000026827  | Pacc1      | 0.177324815 | 0.000756454 |
| ENSMUSG0000000036580  | Spart      | 0.177174268 | 5.89E-09    |
| ENSMUSG000000002608   | Smc6       | 0.177057174 | 5.38E-06    |
| ENSMUSG000000042323   | Ptprm1     | 0.17703124  | 0.00023555  |
| ENSMUSG0000000031778  | C3cd1      | 0.176962086 | 2.18E-06    |
| ENSMUSG0000000019969  | Psen1      | 0.176930621 | 0.002227275 |
| ENSMUSG0000000048170  | Morbp      | 0.176847925 | 3.05E-08    |
| ENSMUSG0000000022507  | Hapst1     | 0.176650113 | 0.044348297 |
| ENSMUSG0000000020215  | Bcap31     | 0.176473345 | 4.11E-06    |
| ENSMUSG000000044792   | Iscal      | 0.176051742 | 2.77E-06    |
| ENSMUSG0000000060261  | Gr2f       | 0.17603808  | 8.06E-05    |
| ENSMUSG000000027447   | Cat3       | 0.175237516 | 2.32E-05    |
| ENSMUSG0000000035637  | Ghrp       | 0.175076351 | 1.93E-14    |
| ENSMUSG0000000024764  | Naad4      | 0.174970794 | 0.032048707 |
| ENSMUSG0000000018171  | Vmp1       | 0.174962731 | 0.00209098  |
| ENSMUSG0000000090115  | Usp49      | 0.174716338 | 0.040258805 |
| ENSMUSG0000000038366  | Lasp1      | 0.174154193 | 1.60E-05    |
| ENSMUSG0000000089824  | Rbm12      | 0.173384755 | 0.02841654  |
| ENSMUSG0000000036504  | Ppht1      | 0.17335665  | 0.000592176 |
| ENSMUSG000000047728   | Lyf62      | 0.173346572 | 0.005495235 |
| ENSMUSG0000000028329  | Xpa        | 0.173075912 | 0.0391561   |
| ENSMUSG000000027315   | Spin1t     | 0.173025938 | 0.000589411 |
| ENSMUSG0000000024639  | Gnaq       | 0.172890096 | 2.53E-09    |
| ENSMUSG0000000026033  | Acd1       | 0.172507282 | 2.27E-16    |
| ENSMUSG00000000000125 | Wnt3       | 0.172265903 | 1.17E-05    |
| ENSMUSG0000000036806  | Ptmb2      | 0.172087488 | 2.19E-11    |
| ENSMUSG0000000057143  | Trim12c    | 0.171950288 | 9.35E-05    |
| ENSMUSG000000020788   | Atp2a3     | 0.171722845 | 2.28E-09    |
| ENSMUSG0000000073402  | Gm8909     | 0.171598016 | 1.79E-10    |
| ENSMUSG000000021565   | Sic1a9     | 0.171429727 | 6.26E-09    |
| ENSMUSG0000000028470  | Hint2      | 0.171358752 | 6.37E-11    |
| ENSMUSG0000000030739  | Myh14      | 0.171026355 | 6.86E-11    |
| ENSMUSG0000000025528  | 2010106E10 | 0.170987034 | 6.92E-09    |
| ENSMUSG0000000060376  | Bokda      | 0.170928569 | 0.00129736  |
| ENSMUSG0000000038604  | Rpor1      | 0.169992076 | 0.036251442 |
| ENSMUSG000000026353   | Ubn4       | 0.169740943 | 0.022591247 |
| ENSMUSG000000022752   | Torm70a    | 0.169498094 | 7.18E-29    |
| ENSMUSG000000027457   | Snpb       | 0.169476356 | 0.002484515 |
| ENSMUSG0000000032679  | Cd59a      | 0.168975428 | 0.046790081 |
| ENSMUSG000000061474   | Mps36      | 0.168702311 | 2.21E-06    |
| ENSMUSG0000000027475  | Kir3fb     | 0.168474543 | 0.034301603 |
| ENSMUSG000000032023   | Epn1       | 0.168332274 | 0.028016101 |
| ENSMUSG0000000026840  | Ptma2      | 0.168191944 | 0.000446959 |
| ENSMUSG000000042284   | Igfa1      | 0.168120591 | 0.002844741 |
| ENSMUSG0000000029290  | Zfp326     | 0.168002655 | 0.01855678  |
| ENSMUSG000000030774   | Pak1       | 0.16796997  | 7.49E-08    |
| ENSMUSG000000022744   | Cldm1      | 0.167850052 | 1.32E-16    |
| ENSMUSG000000041987   | Tlk1       | 0.167465353 | 3.79E-06    |
| ENSMUSG0000000024782  | Ak3        | 0.167390272 | 1.57E-06    |
| ENSMUSG0000000044950  | Pwmp2a     | 0.167298199 | 0.005724798 |
| ENSMUSG000000030767   | Lyw1       | 0.167075588 | 0.002104265 |
| ENSMUSG000000040865   | Ino80b     | 0.166845748 | 2.90E-06    |
| ENSMUSG000000038506   | Doun1d2    | 0.166680378 | 0.016392718 |
| ENSMUSG000000050698   | Crc1       | 0.166625044 | 0.000275054 |
| ENSMUSG000000026189   | Pier       | 0.16610713  | 0.03069527  |
| ENSMUSG000000021662   | Argwz8     | 0.166046161 | 0.00187628  |
| ENSMUSG0000000030213  | Atf7ip     | 0.166037784 | 0.015247343 |
| ENSMUSG000000020009   | Ilfgr1     | 0.166005441 | 0.04827283  |
| ENSMUSG000000017837   | Nkiras2    | 0.165782556 | 0.001746391 |
| ENSMUSG000000036352   | Ubcac1     | 0.165640283 | 9.12E-11    |
| ENSMUSG000000027778   | Kdsr1      | 0.165475421 | 2.73E-10    |
| ENSMUSG0000000034667  | Ankr2d7    | 0.164899216 | 0.002802407 |
| ENSMUSG0000000031158  | Trim17b    | 0.164730716 | 1.66E-06    |
| ENSMUSG0000000051495  | Ilf2bp2    | 0.16461798  | 3.21E-05    |
| ENSMUSG0000000021884  | Hac1i      | 0.164502312 | 0.001978751 |
| ENSMUSG0000000045775  | Slc16a5    | 0.164345777 | 0.007886387 |
| ENSMUSG0000000294455  | Aldh2      | 0.164191751 | 8.80E-08    |
| ENSMUSG0000000038013  | Wpfr2      | 0.163902534 | 0.000782135 |
| ENSMUSG0000000060299  | Aadp       | 0.16383442  | 0.005626217 |
| ENSMUSG0000000048251  | Bm11b      | 0.163648306 | 8.57E-12    |
| ENSMUSG0000000109336  | Samd4b     | 0.163587451 | 1.36E-07    |
| ENSMUSG000000017485   | Top2b      | 0.163249215 | 0.011929613 |
| ENSMUSG0000000020359  | Pknox1     | 0.16300025  | 0.00618389  |
| ENSMUSG0000000029726  | Mpoce      | 0.163063181 | 0.036143086 |
| ENSMUSG0000000032290  | Ptprn9     | 0.163022158 | 3.84E-08    |
| ENSMUSG0000000020877  | Scm2       | 0.162924969 | 0.00654496  |
| ENSMUSG0000000221114  | Spry2      | 0.16264765  | 0.000586423 |
| ENSMUSG0000000029330  | Cds1       | 0.162196092 | 0.000498281 |
| ENSMUSG000000026991   | Pkfp4      | 0.162146114 | 3.46E-07    |
| ENSMUSG000000028255   | Claa1      | 0.161296977 | 2.01E-11    |
| ENSMUSG000000031822   | Gae1       | 0.161096818 | 1.19E-05    |
| ENSMUSG0000000109644  | pe10005C13 | 0.161067822 | 5.87E-14    |
| ENSMUSG0000000037470  | Ugna1      | 0.160895837 | 0.00053909  |
| ENSMUSG0000000053841  | Xltn1      | 0.160715219 | 8.60E-05    |
| ENSMUSG0000000033949  | Trim36     | 0.16047664  | 0.00883891  |
| ENSMUSG0000000001552  | Jup        | 0.16043991  | 1.38E-14    |
| ENSMUSG0000000024974  | Smc3       | 0.160077845 | 7.15E-13    |
| ENSMUSG0000000029145  | Elf2b4     | 0.159999686 | 0.012467313 |
| ENSMUSG0000000070837  | Prrg2      | 0.159956857 | 6.09E-09    |
| ENSMUSG0000000087433  | Km14167    | 0.159790415 | 0.00574104  |
| ENSMUSG000000001280   | Sp1        | 0.15909636  | 3.30E-11    |
| ENSMUSG0000000087165  | 2010001A14 | 0.158841901 | 3.45E-14    |
| ENSMUSG0000000036188  | Ankr14     | 0.158663133 | 0.013031335 |
| ENSMUSG0000000030622  | Prr14      | 0.158274845 | 0.000212389 |
| ENSMUSG000000049106   | Daf5       | 0.158050785 | 0.014448901 |
| ENSMUSG0000000029185  | Fam114a1   | 0.156984933 | 4.30E-05    |
| ENSMUSG0000000000454  | Mapk3k1    | 0.156808108 | 0.036177377 |
| ENSMUSG0000000031835  | Mtsp1a     | 0.156389916 | 0.012964896 |
| ENSMUSG0000000021236  | Entpd5     | 0.156236617 | 4.66E-07    |
| ENSMUSG0000000032532  | Csm2       | 0.155471755 | 3.70E-15    |
| ENSMUSG0000000058173  | Smc4a      | 0.155041292 | 0.021524132 |
| ENSMUSG0000000049090  | Ptgr3      | 0.15478928  | 0.000393694 |

|                      |            |              |              |                     |         |             |             |                     |           |              |             |                      |           |             |             |
|----------------------|------------|--------------|--------------|---------------------|---------|-------------|-------------|---------------------|-----------|--------------|-------------|----------------------|-----------|-------------|-------------|
| ENSMUSG00000005510   | Ndrfs3     | -0.097719406 | 1.51E-05     | ENSMUSG00000042500  | Agp4    | 0.154342593 | 0.014262929 | ENSMUSG00000003837  | Gm14427   | -0.086066451 | 0.000994978 | ENSMUSG00000005609   | Cr9r      | 0.121129163 | 0.023972146 |
| ENSMUSG000000018923  | Medt11     | -0.097652005 | 0.000735635  | ENSMUSG000000031662 | Smn2d   | 0.154234262 | 2.58E-13    | ENSMUSG000000020440 | Arf5      | -0.085887108 | 4.07E-29    | ENSMUSG000000025220  | Oga       | 0.121004937 | 0.001836723 |
| ENSMUSG000000029616  | Tbct1d14   | -0.097615477 | 0.0234826    | ENSMUSG000000030242 | Smad3   | 0.15384757  | 0.000400374 | ENSMUSG000000025310 | Immt      | -0.085557186 | 9.78E-25    | ENSMUSG000000042682  | Selenok   | 0.12100272  | 0.020343029 |
| ENSMUSG000000029486  | Mrp1       | -0.097343537 | 3.95E-07     | ENSMUSG000000031608 | Galn7r  | 0.153682623 | 0.000101096 | ENSMUSG000000025818 | Hnmpab    | -0.084471192 | 0.001345076 | ENSMUSG000000054611  | Kdm2a     | 0.120888378 | 3.91E-06    |
| ENSMUSG000000029187  | Mrp36      | -0.097300887 | 5.97E-05     | ENSMUSG000000009545 | Kcnk1   | 0.153517102 | 1.87E-11    | ENSMUSG000000020526 | Tpm3-rs7  | -0.085359695 | 0.009164354 | ENSMUSG000000022751  | Ntd2      | 0.120833128 | 1.74E-09    |
| ENSMUSG000000015612  | Gnrh1      | -0.097254711 | 0.014262929  | ENSMUSG000000022564 | Glna    | 0.153074762 | 0.027905181 | ENSMUSG000000039293 | Medt11    | -0.08516469  | 0.000735635 | ENSMUSG000000029335  | Bmp3      | 0.120684857 | 1.81E-09    |
| ENSMUSG000000025823  | Carnap1    | -0.09695368  | 0.036763495  | ENSMUSG000000058351 | Uricq   | 0.152893933 | 0.004119802 | ENSMUSG000000022731 | Tpmrs4    | -0.084447232 | 0.000717121 | ENSMUSG000000042933  | Amf1      | 0.120040945 | 3.40E-08    |
| ENSMUSG000000032427  | Plekhlm1   | -0.096876545 | 0.007364716  | ENSMUSG000000034928 | Rnfc4   | 0.152820005 | 0.000360861 | ENSMUSG000000041926 | Rhnp      | -0.084316605 | 0.000268604 | ENSMUSG000000067813  | Xkr9      | 0.119870053 | 0.001082899 |
| ENSMUSG000000033743  | Slc4a7     | -0.096779996 | 2.48E-16     | ENSMUSG000000062646 | Rnfc4   | 0.152765003 | 5.51E-05    | ENSMUSG000000002099 | Unc5b     | -0.084277809 | 1.68E-09    | ENSMUSG000000019889  | Ptprk     | 0.119803068 | 1.35E-07    |
| ENSMUSG000000049422  | Chchd10    | -0.096113304 | 2.18E-34     | ENSMUSG000000024644 | Gnrd2   | 0.152551408 | 9.91E-14    | ENSMUSG000000075595 | Zfp652    | -0.084054592 | 0.003787764 | ENSMUSG000000047305  | Peak1     | 0.119693802 | 0.004234774 |
| ENSMUSG000000029439  | Cisn1a     | -0.096058669 | 4.80E-05     | ENSMUSG000000089704 | Gnrd2   | 0.152541197 | 0.017850123 | ENSMUSG000000057286 | Zf6gaacn2 | -0.083995666 | 0.014086736 | ENSMUSG000000012114  | Medt15    | 0.119515094 | 8.81E-05    |
| ENSMUSG000000055436  | Srsf11     | -0.095912879 | 0.011034641  | ENSMUSG000000019564 | Arid3a  | 0.152447724 | 0.042971842 | ENSMUSG000000028571 | Cyp21d3   | -0.083862848 | 5.21E-06    | ENSMUSG000000028266  | Lmna      | 0.119397364 | 1.98E-06    |
| ENSMUSG000000000776  | Polr3d     | -0.095871844 | 2.80E-05     | ENSMUSG000000034757 | Tmub2   | 0.152196043 | 0.026608554 | ENSMUSG000000023208 | Mrp143    | -0.08385977  | 2.77E-05    | ENSMUSG000000042406  | Afh4      | 0.119296088 | 0.030907742 |
| ENSMUSG000000074195  | Cicab4b    | -0.095494908 | 2.05E-12     | ENSMUSG000000024991 | Er3a    | 0.151981512 | 6.81E-11    | ENSMUSG000000028635 | Edn2      | -0.08366338  | 1.10E-14    | ENSMUSG000000042492  | Tbct1d10b | 0.119248452 | 0.031622732 |
| ENSMUSG000000044018  | Mrp50      | -0.095452759 | 0.005297974  | ENSMUSG000000042608 | Stk40   | 0.151827912 | 3.22E-05    | ENSMUSG000000020671 | Rab10     | -0.083564377 | 1.24E-07    | ENSMUSG000000032239  | Rpr9      | 0.119166867 | 0.049400636 |
| ENSMUSG000000036810  | Cnep1r1    | -0.095422652 | 2.37E-18     | ENSMUSG000000029201 | Ugdh    | 0.151410242 | 4.35E-46    | ENSMUSG000000020330 | Hmnr      | -0.083356618 | 8.37E-05    | ENSMUSG000000067071  | Hea6      | 0.119146084 | 2.66E-05    |
| ENSMUSG000000039047  | Pigk       | -0.095382028 | 0.027252551  | ENSMUSG000000028854 | Slc1a1  | 0.151234444 | 0.002881891 | ENSMUSG000000019179 | Mdh2      | -0.082968346 | 5.96E-92    | ENSMUSG0000000202379 | Nduaf11   | 0.119078948 | 6.05E-11    |
| ENSMUSG000000051671  | Coa6       | -0.095291051 | 0.000473174  | ENSMUSG000000038127 | Ccdc50  | 0.151189443 | 0.001485771 | ENSMUSG000000041394 | Pam1b     | -0.082759357 | 1.93E-07    | ENSMUSG000000021477  | Ctcf      | 0.119066686 | 1.25E-32    |
| ENSMUSG00000001151   | Tbk1       | -0.095026902 | 0.007256752  | ENSMUSG000000027487 | Cdkrap1 | 0.15115411  | 0.012287356 | ENSMUSG000000047394 | Odr3b     | -0.082748999 | 9.79E-08    | ENSMUSG000000050747  | Trim15    | 0.119058286 | 1.25E-06    |
| ENSMUSG000000021377  | Dek        | -0.094941872 | 0.00140636   | ENSMUSG000000031913 | Vps4a   | 0.150944322 | 0.003299273 | ENSMUSG000000030531 | Er3       | -0.082525587 | 0.013686283 | ENSMUSG000000040470  | Hmxo2     | 0.118705005 | 0.000829264 |
| ENSMUSG000000007684  | Romo1      | -0.094842071 | 0.000122598  | ENSMUSG000000008926 | Cers4   | 0.150872502 | 0.026280643 | ENSMUSG000000033768 | Chchd3    | -0.082523447 | 9.62E-26    | ENSMUSG000000029478  | Nxor2     | 0.118667017 | 4.06E-05    |
| ENSMUSG000000031600  | Vps7a3     | -0.094683197 | 0.001456499  | ENSMUSG000000032612 | Usp4    | 0.150865251 | 0.000634734 | ENSMUSG000000030061 | Uba3      | -0.082491233 | 3.45E-05    | ENSMUSG000000036073  | Gal1      | 0.118496536 | 0.020060738 |
| ENSMUSG0000000202136 | DnaC7      | -0.094626588 | 0.000116484  | ENSMUSG000000090266 | Mert23  | 0.150809098 | 0.016355893 | ENSMUSG000000029612 | Cndp1     | -0.082419387 | 0.047670499 | ENSMUSG000000049348  | Upk1b     | 0.118305344 | 3.28E-12    |
| ENSMUSG0000000202111 | Akt1c12    | -0.094446681 | 1.89E-45     | ENSMUSG000000051154 | Ctmdm3  | 0.150644715 | 0.00548183  | ENSMUSG00000004394  | Tmed4     | -0.082395537 | 6.19E-18    | ENSMUSG000000001158  | Smpm27    | 0.118243777 | 4.44E-06    |
| ENSMUSG0000000202180 | Snrp3d     | -0.094281446 | 0.009838726  | ENSMUSG000000068040 | Tmrb4   | 0.150397119 | 0.00001369  | ENSMUSG000000020330 | Zfp472    | -0.082341585 | 0.011451514 | ENSMUSG000000020903  | Strb8     | 0.118161517 | 0.019730174 |
| ENSMUSG000000019978  | Epb41b2    | -0.094142701 | 5.56E-10     | ENSMUSG000000032293 | Ireb2   | 0.150267748 | 6.00E-09    | ENSMUSG000000031662 | Smn2d     | -0.082296514 | 2.58E-13    | ENSMUSG000000019710  | Mrp24     | 0.118069547 | 6.94E-06    |
| ENSMUSG0000000202108 | Pp2c       | -0.093662482 | 4.36E-12     | ENSMUSG000000028884 | Urod    | 0.150117866 | 9.52E-09    | ENSMUSG000000029971 | Rpn1      | -0.082058594 | 3.45E-05    | ENSMUSG000000001891  | Ugp2      | 0.117893807 | 0.001240401 |
| ENSMUSG0000000202108 | Nr1h3      | -0.093459671 | 0.000142457  | ENSMUSG000000027363 | Urod    | 0.149159624 | 0.032834201 | ENSMUSG000000044034 | Rick3     | -0.082024043 | 0.001218359 | ENSMUSG000000030214  | Pfb2      | 0.11784664  | 0.004005103 |
| ENSMUSG000000006832  | Ctnnb1     | -0.09340949  | 2.44E-15     | ENSMUSG000000003534 | Ddr1    | 0.149159624 | 1.15E-07    | ENSMUSG000000029655 | H2abp2    | -0.081931439 | 2.68E-06    | ENSMUSG000000024985  | Tbct1     | 0.117821176 | 8.83E-06    |
| ENSMUSG000000030243  | Synrcp     | -0.092914494 | 9.25E-08     | ENSMUSG000000022568 | Scrb    | 0.148827821 | 0.00171394  | ENSMUSG000000023399 | Rab10     | -0.081900762 | 4.55E-16    | ENSMUSG000000032328  | Scf11     | 0.117641508 | 0.000657344 |
| ENSMUSG000000021576  | Pdcdb      | -0.092890788 | 9.76E-11     | ENSMUSG000000006005 | Trp1    | 0.148815496 | 1.26E-08    | ENSMUSG000000040330 | Pitmnc1   | -0.081668742 | 0.004454409 | ENSMUSG000000058325  | Dock1     | 0.117628773 | 1.28E-10    |
| ENSMUSG0000000204384 | Iws1       | -0.092754435 | 0.001546016  | ENSMUSG000000026773 | Pfkfb3  | 0.14876918  | 0.001717134 | ENSMUSG000000051495 | Irb2bp    | -0.081550323 | 3.21E-08    | ENSMUSG000000028008  | Aic5      | 0.117582004 | 0.009523924 |
| ENSMUSG0000000204384 | Nr2cap     | -0.092600443 | 0.033620746  | ENSMUSG000000009376 | Met     | 0.148724658 | 0.021765742 | ENSMUSG00000004162  | Jp12      | -0.081331969 | 0.01628667  | ENSMUSG000000010358  | Risc3     | 0.117165849 | 1.73E-25    |
| ENSMUSG000000021756  | Ilfet      | -0.092564645 | 0.00851288   | ENSMUSG000000030579 | Tynrbp  | 0.148495402 | 0.00039658  | ENSMUSG000000040844 | Smim13    | -0.080921531 | 0.006063652 | ENSMUSG000000042210  | Abhd14a   | 0.117138703 | 0.000159867 |
| ENSMUSG000000021756  | Lars       | -0.092419527 | 0.001765034  | ENSMUSG000000052393 | Pom121  | 0.148221208 | 5.59E-05    | ENSMUSG000000071180 | Samp15    | -0.080289104 | 2.04E-06    | ENSMUSG000000026200  | Nduaf10   | 0.116574871 | 5.01E-16    |
| ENSMUSG000000029407  | Uro        | -0.092193611 | 3.80E-11     | ENSMUSG000000048118 | Arid4   | 0.148188287 | 2.32E-09    | ENSMUSG000000028773 | Pfkfb3    | -0.080822942 | 0.001717134 | ENSMUSG000000018585  | Atovp     | 0.116521914 | 4.40E-07    |
| ENSMUSG000000029477  | Lrrc9      | -0.091904969 | 0.00249024   | ENSMUSG000000020423 | Rn2     | 0.148181301 | 0.002679498 | ENSMUSG000000041126 | H2ac2     | -0.080698295 | 0.000245425 | ENSMUSG000000018509  | Cenpx1    | 0.116257164 | 8.51E-05    |
| ENSMUSG000000033533  | Rapp60f    | -0.091747376 | 0.04217825   | ENSMUSG000000030655 | Smp1    | 0.147779891 | 0.030362397 | ENSMUSG000000040505 | Abcg5     | -0.079865818 | 9.88E-12    | ENSMUSG000000009057  | Mmp14     | 0.11613668  | 0.003730007 |
| ENSMUSG0000000210550 | N210016F16 | -0.091404158 | 3.53E-06     | ENSMUSG000000026956 | Smp1    | 0.147779891 | 0.030362397 | ENSMUSG00000004342  | Cbl       | -0.079813505 | 0.00173483  | ENSMUSG000000034707  | Gns       | 0.116072401 | 0.000919104 |
| ENSMUSG0000000307075 | Rfp139     | -0.091388539 | 2.00E-05     | ENSMUSG000000022629 | Kif21a  | 0.147217908 | 2.83E-10    | ENSMUSG000000025832 | Acaca     | -0.079778312 | 1.71E-05    | ENSMUSG000000063952  | Bpr3      | 0.115998989 | 0.000170658 |
| ENSMUSG0000000076834 | Igfv1      | -0.091387449 | 0.001877963  | ENSMUSG000000029758 | Kif21a  | 0.145272714 | 1.23E-06    | ENSMUSG000000005086 | Deaf1     | -0.079715591 | 0.031270982 | ENSMUSG000000047514  | Rpr21a    | 0.115764424 | 0.010690033 |
| ENSMUSG0000000202268 | Nuclt12    | -0.090779776 | 6.88E-05     | ENSMUSG000000042719 | Naa25   | 0.144715708 | 1.44E-07    | ENSMUSG000000022747 | Sr3ga6    | -0.079714403 | 2.38E-11    | ENSMUSG000000024621  | Celf1     | 0.11570526  | 0.00447197  |
| ENSMUSG000000004476  | Usp19      | -0.090706041 | 0.04474806   | ENSMUSG000000023208 | Sernc3  | 0.144723208 | 9.83E-06    | ENSMUSG000000034932 | Mrp143    | -0.079711156 | 3.36E-10    | ENSMUSG000000026319  | Rchir     | 0.1156212   | 0.048517154 |
| ENSMUSG0000000073002 | Vamp5      | -0.090637653 | 6.61E-15     | ENSMUSG000000062691 | Cebpzps | 0.144202839 | 7.91E-12    | ENSMUSG000000038213 | Tap1b     | -0.079560086 | 0.000189635 | ENSMUSG000000024799  | Tm7af2    | 0.115504852 | 2.18E-05    |
| ENSMUSG00000002687   | Pp2c       | -0.090520084 | 0.033438689  | ENSMUSG000000042198 | Chchd7  | 0.144101568 | 0.000274522 | ENSMUSG000000029182 | Ilna2     | -0.079322806 | 0.000229063 | ENSMUSG000000047554  | Tmem11b   | 0.115240846 | 3.89E-05    |
| ENSMUSG000000070544  | Top1       | -0.09039899  | 4.92E-11     | ENSMUSG000000028809 | Smm1    | 0.144022573 | 8.21E-05    | ENSMUSG000000029462 | Polr1d    | -0.079298216 | 0.000774023 | ENSMUSG000000028247  | Coq3      | 0.115115187 | 0.002269371 |
| ENSMUSG000000033959  | Petp1      | -0.09033507  | 1.16E1120851 | ENSMUSG000000050506 | Celf1   | 0.143824041 | 4.60E-06    | ENSMUSG000000012964 | Zf3bgr1   | -0.07895552  | 4.43E-14    | ENSMUSG000000074093  | Scip      | 0.114739642 | 1.06E-09    |
| ENSMUSG000000031353  | Mrps31     | -0.090308238 | 2.04E-06     | ENSMUSG000000062373 | Tmem65  | 0.1435678   | 8.02E-08    | ENSMUSG000000019432 | Dad39b    | -0.078895714 | 0.000785021 | ENSMUSG000000046434  | Hnmpa1    | 0.114598674 | 3.20E-05    |
| ENSMUSG000000025853  | Tmcd1      | -0.089907646 | 0.002397492  | ENSMUSG000000029196 | Tad1zb  | 0.143326381 | 0.010668865 | ENSMUSG00000007036  | Abd1a6    | -0.07887803  | 4.82E-06    | ENSMUSG000000022571  | Pyrp1     | 0.114416684 | 8.09E-11    |
| ENSMUSG000000045128  | Pf18a      | -0.08961866  | 1.14E-06     | ENSMUSG000000017291 | Tack1   | 0.143006698 | 9.43E-07    | ENSMUSG000000033416 | Gudc1     | -0.078853922 | 5.75E-07    | ENSMUSG000000034640  | Tiparp    | 0.11372985  | 8.23E-10    |
| ENSMUSG000000050345  | Pias1      | -0.089199379 | 0.002349848  | ENSMUSG000000049076 | Acap2   | 0.143027256 | 0.01891057  | ENSMUSG00000010277  | Bpr1      | -0.078694925 | 0.03242581  | ENSMUSG000000018707  | Ctenx1h1  | 0.113678205 | 8.90E-05    |
| ENSMUSG0000000202268 | Z          |              |              |                     |         |             |             |                     |           |              |             |                      |           |             |             |

|                       |             |              |             |                      |          |             |             |                     |          |              |             |                      |           |              |             |
|-----------------------|-------------|--------------|-------------|----------------------|----------|-------------|-------------|---------------------|----------|--------------|-------------|----------------------|-----------|--------------|-------------|
| ENSMUSG00000027746    | Ufm1        | -0.077384425 | 1.65E-07    | ENSMUSG000000028394  | Pole3    | 0.128476384 | 0.002159169 | ENSMUSG000000022214 | Dcaf11   | -0.067357763 | 0.000370682 | ENSMUSG000000024317  | Rnf138    | 0.103362976  | 0.03430665  |
| ENSMUSG00000007494    | Ardc3       | -0.077264382 | 7.20E-06    | ENSMUSG000000005882  | Zpbc1    | 0.128407131 | 6.63E-13    | ENSMUSG000000003199 | Mpnd     | -0.067128484 | 0.010688445 | ENSMUSG000000110344  | Smm36     | 0.102793112  | 0.00017335  |
| ENSMUSG00000002698    | Piggc       | -0.077023005 | 8.40E-06    | ENSMUSG000000046185  | Zlpc4    | 0.128212646 | 1.72E-05    | ENSMUSG000000051316 | T7af     | -0.066993705 | 0.000471846 | ENSMUSG0000000204513 | Mbzd2     | 0.102385797  | 0.064694805 |
| ENSMUSG00000004777    | Rfln152     | -0.076857362 | 8.97E-21    | ENSMUSG000000032860  | P2ry2    | 0.128158073 | 4.28E-13    | ENSMUSG000000024955 | Easra    | -0.06683428  | 5.68E-07    | ENSMUSG000000009995  | Tafazcn1  | 0.102198366  | 1.47E-05    |
| ENSMUSG0000000035147  | Arf4        | -0.07665896  | 5.65E-17    | ENSMUSG000000043998  | Mg2t2    | 0.128029689 | 1.11E-09    | ENSMUSG000000026499 | Acbd3    | -0.066821048 | 1.02E-05    | ENSMUSG000000028229  | Rmnc1     | 0.102158137  | 9.26E-26    |
| ENSMUSG000000018585   | Atox1       | -0.076543212 | 4.40E-07    | ENSMUSG000000005566  | Trimr28  | 0.128014997 | 0.00080709  | ENSMUSG000000031839 | Hsbp1    | -0.066765003 | 0.000367241 | ENSMUSG000000029028  | Lncf4     | 0.10206156   | 0.011874495 |
| ENSMUSG0000000037251  | Ces1f       | -0.075939622 | 2.19E-36    | ENSMUSG000000020523  | Fam114a2 | 0.127809598 | 1.75E-10    | ENSMUSG000000023942 | Sic29a1  | -0.066604272 | 0.013050746 | ENSMUSG000000029238  | Ehrn1     | 0.1021170649 | 5.94E-08    |
| ENSMUSG000000018481   | Appb2       | -0.075481738 | 0.017726204 | ENSMUSG000000020736  | Nt5c     | 0.127896047 | 8.00E-05    | ENSMUSG000000027285 | Haua2    | -0.066425968 | 0.000333794 | ENSMUSG000000027350  | Chgb      | 0.100936007  | 1.45E-08    |
| ENSMUSG000000020675   | Khlh20      | -0.074925042 | 0.032848588 | ENSMUSG000000032352  | Lnc5     | 0.127653485 | 6.85E-06    | ENSMUSG000000021781 | Trimc14  | -0.066277562 | 2.08E-11    | ENSMUSG000000078622  | Codc47    | 0.100913456  | 0.007901452 |
| ENSMUSG0000000208706  | Nuam4       | -0.074856794 | 0.000129291 | ENSMUSG000000032621  | Srk1     | 0.127621147 | 0.000767964 | ENSMUSG000000041997 | Tlk1     | -0.066051745 | 3.79E-06    | ENSMUSG000000054676  | 100014C10 | 0.10073757   | 1.62E-18    |
| ENSMUSG000000003514   | Kr1         | -0.074381936 | 0.00051638  | ENSMUSG000000074748  | Aktn73b  | 0.127614422 | 7.95E-07    | ENSMUSG000000024474 | Ndufb2   | -0.065992921 | 5.31E-16    | ENSMUSG00000007827   | Ankrd26   | 0.100438524  | 0.009790995 |
| ENSMUSG0000000205504  | Epsb82      | -0.074311452 | 0.014917891 | ENSMUSG0000000025533 | Pha1a1   | 0.127567028 | 6.55E-08    | ENSMUSG000000026784 | Pdca1    | -0.065933785 | 1.09E-05    | ENSMUSG000000042202  | Sic35a2   | 0.100328499  | 0.023242099 |
| ENSMUSG0000000120995  | Gm51425     | -0.073743309 | 0.000103279 | ENSMUSG000000018740  | Sic25a35 | 0.127169533 | 1.30E-05    | ENSMUSG000000027566 | Psm2a7   | -0.065623153 | 9.31E-08    | ENSMUSG000000041702  | Btdb7     | 0.10024226   | 0.000302082 |
| ENSMUSG000000024847   | Aip         | -0.073590737 | 2.12E-08    | ENSMUSG000000000131  | Xpo6     | 0.126572557 | 9.31E-06    | ENSMUSG000000028988 | Tmau1ap  | -0.065607065 | 0.00174785  | ENSMUSG00000114358   | Gm5200    | 0.10017749   | 6.33E-07    |
| ENSMUSG0000000040722  | Scamp5      | -0.073576287 | 1.24E-27    | ENSMUSG000000008748  | Zbcd6    | 0.126348694 | 0.001192621 | ENSMUSG000000024474 | Ik       | -0.06556538  | 0.014622793 | ENSMUSG000000054226  | Tprkb     | 0.100136822  | 8.50E-11    |
| ENSMUSG0000000087590  | Epb4114aas  | -0.073247404 | 0.031263462 | ENSMUSG000000078650  | G6pc     | 0.126561057 | 1.24E-83    | ENSMUSG000000027263 | Tubgcp4  | -0.06544696  | 0.00388279  | ENSMUSG000000020846  | Timmdc1   | 0.10004575   | 0.013911135 |
| ENSMUSG0000000074259  | Gram2a      | -0.07295673  | 0.00254277  | ENSMUSG0000000094410 | Zbcd6    | 0.126348694 | 0.001192621 | ENSMUSG000000034525 | Ice1     | -0.065222869 | 0.00122028  | ENSMUSG000000049624  | Appb2     | 0.099705375  | 0.01726204  |
| ENSMUSG000000006456   | Rbm14       | -0.072945892 | 0.001527893 | ENSMUSG000000026608  | Trimc45  | 0.125879918 | 0.011831041 | ENSMUSG000000057682 | Gm6169   | -0.065210446 | 0.04605327  | ENSMUSG000000029106  | Add1      | 0.099459714  | 2.03E-09    |
| ENSMUSG0000000039254  | Pom1        | -0.072596855 | 0.034874097 | ENSMUSG000000055296  | Tmem245  | 0.125879918 | 0.011831041 | ENSMUSG000000023445 | Laptrm4a | -0.065202865 | 9.83E-07    | ENSMUSG000000049624  | Sic17a5   | 0.09900655   | 8.45E-19    |
| ENSMUSG0000000059923  | Grb8        | -0.072480448 | 0.045766349 | ENSMUSG000000036202  | Rf1      | 0.125867381 | 0.002047968 | ENSMUSG000000023537 | Dgk8     | -0.065185393 | 3.59E-11    | ENSMUSG000000014551  | Rmp25     | 0.098930237  | 0.000101256 |
| ENSMUSG000000041278   | Tct1        | -0.07239505  | 0.014926597 | ENSMUSG000000039882  | Trim120a | 0.125867381 | 2.98E-10    | ENSMUSG000000023445 | Snmpp40  | -0.065161029 | 0.015036984 | ENSMUSG000000022338  | Ery2      | 0.09839941   | 1.59E-08    |
| ENSMUSG0000000059163  | Exoc4       | -0.072370868 | 1.58E-05    | ENSMUSG000000052271  | Bhh1a15  | 0.125535724 | 9.16E-06    | ENSMUSG000000031004 | Mkaf6    | -0.065143178 | 3.79E-05    | ENSMUSG000000002280  | Ciaa3     | 0.09821491   | 0.024637667 |
| ENSMUSG000000002374   | Ffar2       | -0.07236755  | 4.97E-05    | ENSMUSG0000000052621 | Huwei1   | 0.12529037  | 0.000251276 | ENSMUSG000000035840 | Lysmd3   | -0.064883756 | 0.000639615 | ENSMUSG000000015804  | Med28     | 0.098281587  | 0.000353459 |
| ENSMUSG000000000732   | Icosl       | -0.072141148 | 0.038753168 | ENSMUSG000000024665  | Fad2c    | 0.125077367 | 3.93E-15    | ENSMUSG000000020914 | Top2a    | -0.064817866 | 1.61E-07    | ENSMUSG000000025477  | Impdp5a   | 0.098276373  | 7.44E-10    |
| ENSMUSG000000002576   | Bmp2        | -0.071995226 | 1.06E-08    | ENSMUSG0000000094410 | Ldb3     | 0.124949563 | 1.03E-13    | ENSMUSG000000022445 | Cyp2d6   | -0.064592374 | 1.04E-24    | ENSMUSG00000113902   | Ndufb1    | 0.097750808  | 2.72E-06    |
| ENSMUSG0000000038759  | Alg9        | -0.071529808 | 0.047208109 | ENSMUSG000000028180  | Zranb2   | 0.124679859 | 0.001268844 | ENSMUSG000000068551 | Zfp467   | -0.064500117 | 2.08E-11    | ENSMUSG000000015688  | Pdcd11    | 0.097592928  | 0.000307315 |
| ENSMUSG0000000001020  | Atpg3       | -0.07085811  | 2.10E-18    | ENSMUSG0000000074649 | BCD29722 | 0.124614996 | 8.00E-07    | ENSMUSG000000048182 | Ac2f4    | -0.064481821 | 0.014387553 | ENSMUSG000000057367  | Pdm2      | 0.097545187  | 0.003113836 |
| ENSMUSG0000000004888  | Atpgv1f1    | -0.070424325 | 0.000158318 | ENSMUSG000000028138  | Adh5     | 0.124020075 | 6.01E-27    | ENSMUSG000000047824 | Pyyg2    | -0.064255924 | 0.000122924 | ENSMUSG000000039753  | Fhb5      | 0.097359709  | 4.14E-08    |
| ENSMUSG0000000032854  | Ctu1        | -0.070347138 | 0.033620746 | ENSMUSG000000038880  | Mpps34   | 0.123516838 | 9.87E-09    | ENSMUSG000000059456 | Pik2b    | -0.064197669 | 0.008001785 | ENSMUSG000000015656  | Hamc4     | 0.097271474  | 0.000460382 |
| ENSMUSG000000045328   | Cerpe       | -0.070339819 | 1.04E-10    | ENSMUSG000000027650  | Ttr1     | 0.122693738 | 4.06E-05    | ENSMUSG000000021576 | Pdcd6    | -0.064008354 | 9.76E-11    | ENSMUSG000000027303  | Ptprra    | 0.097137302  | 0.048797284 |
| ENSMUSG0000000001490  | Nadsyn1     | -0.070286587 | 9.62E-07    | ENSMUSG000000022244  | Nadcy3   | 0.122623423 | 1.48E-06    | ENSMUSG000000038298 | Pdca1    | -0.06356216  | 5.73E-11    | ENSMUSG000000018481  | Macroh2a1 | 0.096692922  | 0.004329772 |
| ENSMUSG0000000200133  | Z310011J033 | -0.070129867 | 0.000192737 | ENSMUSG000000032852  | Chd1     | 0.122569309 | 0.002773112 | ENSMUSG00000003706  | Cdb1     | -0.063541287 | 2.43E-08    | ENSMUSG000000056612  | Ppp1r14b  | 0.09605298   | 6.15E-05    |
| ENSMUSG00000000054065 | Pkp3        | -0.070172242 | 2.63E-09    | ENSMUSG000000029260  | Ugtm234  | 0.121937714 | 7.51E-54    | ENSMUSG000000027937 | Ikb      | -0.063513148 | 4.35E-05    | ENSMUSG00000002767   | Mrp2      | 0.09572831   | 0.005032346 |
| ENSMUSG000000011709   | Gm3776      | -0.070103213 | 1.25E-36    | ENSMUSG000000056899  | Immp2l   | 0.121865054 | 1.08E-05    | ENSMUSG000000038982 | Bcl1a5   | -0.063386393 | 0.01438656  | ENSMUSG000000028212  | Cme2      | 0.09560737   | 0.000470431 |
| ENSMUSG000000000750   | Sypl        | -0.070120677 | 0.000411072 | ENSMUSG000000009647  | Lmu      | 0.121842158 | 0.004831708 | ENSMUSG00000003982  | Ospl5    | -0.063169091 | 0.000846162 | ENSMUSG000000060395  | Hyf1      | 0.095677492  | 0.003729703 |
| ENSMUSG000000000158   | Snmr27      | -0.07005046  | 4.44E-06    | ENSMUSG000000017119  | Nbr1     | 0.121485246 | 0.000107037 | ENSMUSG000000058301 | Uprf3    | -0.063167919 | 0.029220285 | ENSMUSG000000024241  | Soc1      | 0.095619317  | 0.019527073 |
| ENSMUSG0000000036834  | Pch1        | -0.069510045 | 0.031627232 | ENSMUSG000000073412  | Lst1     | 0.121265162 | 0.041782234 | ENSMUSG000000031029 | Elf3f    | -0.062768216 | 1.35E-13    | ENSMUSG000000026698  | Pgsi      | 0.095454682  | 8.40E-06    |
| ENSMUSG0000000003923  | Tiam        | -0.069086538 | 0.000788207 | ENSMUSG000000022295  | Atpgv1c1 | 0.121202553 | 9.63E-05    | ENSMUSG000000067343 | tpmk     | -0.062688387 | 4.17E-30    | ENSMUSG000000042726  | Traf2     | 0.095393721  | 1.55E-09    |
| ENSMUSG0000000118052  | Gm0432      | -0.06882733  | 4.80E-25    | ENSMUSG000000034160  | Qgt      | 0.120674755 | 0.000336715 | ENSMUSG000000030536 | igmp1    | -0.062644385 | 0.025806861 | ENSMUSG000000040447  | Scmd2     | 0.095257904  | 4.00E-10    |
| ENSMUSG000000047080   | Near3       | -0.068835354 | 0.00116571  | ENSMUSG000000028149  | Rap1gds1 | 0.120577289 | 0.014652219 | ENSMUSG000000023881 | Nab1     | -0.062356654 | 0.00568452  | ENSMUSG000000050530  | Fam171a1  | 0.095193647  | 0.000286573 |
| ENSMUSG0000000021553  | Pctp        | -0.06866472  | 0.030315921 | ENSMUSG000000030780  | Rf1      | 0.120565454 | 0.03227142  | ENSMUSG000000051232 | Trimr199 | -0.062243839 | 0.003149999 | ENSMUSG000000022370  | Mmp13     | 0.095136305  | 1.12E-07    |
| ENSMUSG000000028882   | Sic25a33    | -0.068550571 | 0.01007111  | ENSMUSG000000029727  | Cyp3a13  | 0.120491834 | 9.75E-109   | ENSMUSG000000054128 | H2-13    | -0.06218797  | 9.39E-10    | ENSMUSG000000028675  | Prrnc2    | 0.095087997  | 0.002863014 |
| ENSMUSG000000012186   | Baigp2i2    | -0.068475596 | 6.45E-09    | ENSMUSG000000034255  | Ahrpag27 | 0.120486497 | 0.02551644  | ENSMUSG000000024413 | H2-13    | -0.06218797  | 9.39E-10    | ENSMUSG000000031634  | Uhsf2     | 0.094853113  | 0.009307836 |
| ENSMUSG000000028820   | Sf1q        | -0.068273009 | 1.42E-09    | ENSMUSG000000060771  | Hes6     | 0.120196526 | 2.66E-05    | ENSMUSG000000041415 | Pha1a1   | -0.062077705 | 0.003977245 | ENSMUSG000000024914  | Drp1      | 0.094666665  | 0.024215576 |
| ENSMUSG000000003400   | Agf1        | -0.067964345 | 0.002485741 | ENSMUSG000000030905  | Crym     | 0.120075245 | 5.69E-26    | ENSMUSG000000025237 | Parp6    | -0.061432539 | 0.013715055 | ENSMUSG000000019738  | Polr2i    | 0.093956684  | 0.013063757 |
| ENSMUSG000000026088   | Mtd1        | -0.067740509 | 2.72E-09    | ENSMUSG000000029646  | Cdc2     | 0.120055085 | 0.03323776  | ENSMUSG000000041319 | Gins1    | -0.061431619 | 0.015930305 | ENSMUSG000000041959  | S10a10    | 0.09379434   | 0.03082743  |
| ENSMUSG000000020122   | Ppp2r3c     | -0.067271423 | 0.000519166 | ENSMUSG000000025130  | P4hb     | 0.119405251 | 1.23E-30    | ENSMUSG000000028242 | Sect1a   | -0.061275542 | 0.006270663 | ENSMUSG000000027646  | Src       | 0.093772275  | 0.001157484 |
| ENSMUSG000000038428   | Msfad4b5    | -0.066938482 | 0.01070431  | ENSMUSG000000024378  | Starnd4  | 0.119294163 | 9.73E-20    | ENSMUSG000000059845 | Smr16c1  | -0.060858656 | 1.50E-06    | ENSMUSG000000031955  | Ranl      | 0.093757707  | 0.000928109 |
| ENSMUSG0000000109305  | Smm38       | -0.066929698 | 0.006244318 | ENSMUSG000000026413  | Gph1     | 0.119285026 | 5.97E-05    | ENSMUSG000000030213 | Atf7f1   | -0.060818317 | 0.015247343 | ENSMUSG000000028327  | Stral6    | 0.093612073  | 0.029706774 |
| ENSMUSG00000004622    | Dctcp1      | -0.066809287 | 6.18E-05    | ENSMUSG000000046814  | Chcfr    | 0.119241118 | 4.89E-13    | ENSMUSG000000030560 | Ctsc     | -0.060775354 | 2.87E-08    | ENSMUSG000000040722  | Scamp5    | 0.093587031  | 1.24E-27    |
| ENSMUSG000000026868   | Mgm3        | -0.066492609 | 1.11E-16    | ENSMUSG000000032279  | Braf     | 0.118913895 | 3.48E-17    | ENSMUSG000000030039 | Amr1m2   | -0.060727283 | 0.000509684 | ENSMUSG000000050856  | Atpk5     | 0.09330      |             |

|                      |            |               |             |                       |           |             |             |                     |            |              |             |                      |            |             |             |
|----------------------|------------|---------------|-------------|-----------------------|-----------|-------------|-------------|---------------------|------------|--------------|-------------|----------------------|------------|-------------|-------------|
| ENSMUSG000000031715  | Smarca5    | -0.056304087  | 0.005351987 | ENSMUSG000000091811   | Inafm1    | 0.106021835 | 0.000500059 | ENSMUSG000000059518 | Znhit1     | -0.046739863 | 1.69E-06    | ENSMUSG00000015243   | Abca1      | 0.082831311 | 8.63E-48    |
| ENSMUSG000000039217  | I18        | -0.056187655  | 1.02E-57    | ENSMUSG000000039352   | Atm       | 0.105896048 | 2.11E-08    | ENSMUSG000000030172 | Erc1       | -0.046497173 | 0.002534117 | ENSMUSG000000025351  | Cd8b3      | 0.082644935 | 1.98E-05    |
| ENSMUSG000000048076  | Arf1       | -0.055965793  | 0.012848986 | ENSMUSG000000015542   | Nasip     | 0.105849991 | 1.59E-06    | ENSMUSG000000028803 | Nipa3b     | -0.045963149 | 0.004483699 | ENSMUSG000000038225  | Prnp1ml    | 0.082547993 | 0.009595913 |
| ENSMUSG00000007870   | Fam174b    | -0.05562468   | 4.95E-10    | ENSMUSG000000039048   | Forward1  | 0.10566403  | 0.000818399 | ENSMUSG000000021000 | Mia2       | -0.045255587 | 7.50E-18    | ENSMUSG000000033075  | Serp1      | 0.082462838 | 2.92E-05    |
| ENSMUSG000000019671  | Krt10      | -0.055349804  | 0.29801642  | ENSMUSG000000029273   | Tstl1d1   | 0.10507278  | 5.00E-18    | ENSMUSG000000011960 | Cmt1       | -0.045240579 | 0.0315752   | ENSMUSG000000037110  | Ralgap2a   | 0.082390985 | 4.29E-05    |
| ENSMUSG000000033716  | Usp3       | -0.0546139072 | 0.00058818  | ENSMUSG000000032366   | Tpm1      | 0.105044718 | 0.00046948  | ENSMUSG000000027944 | Hax1       | -0.0451999   | 0.002652016 | ENSMUSG000000021478  | Nad5       | 0.08236561  | 1.82E-05    |
| ENSMUSG000000002378  | Lrr10      | -0.054614007  | 0.00058818  | ENSMUSG000000036718   | Mical2    | 0.105033962 | 0.001765034 | ENSMUSG000000039813 | Cank1g2    | -0.044870833 | 0.016440004 | ENSMUSG000000024188  | Arnc1      | 0.082350338 | 4.35E-05    |
| ENSMUSG00000000462   | Sdr2       | -0.054397829  | 0.000274552 | ENSMUSG000000038095   | Sbno1     | 0.104685363 | 0.000624374 | ENSMUSG000000047613 | C430005L14 | -0.044609327 | 5.59E-05    | ENSMUSG000000031197  | Vbp1       | 0.082281589 | 0.0345514   |
| ENSMUSG000000028803  | Nipa3b     | -0.054378395  | 0.004483699 | ENSMUSG000000028962   | Slic4a2   | 0.103966348 | 0.037509467 | ENSMUSG000000040234 | Cct2       | -0.044309969 | 1.18E-06    | ENSMUSG000000028392  | Blpy       | 0.081956064 | 7.67E-14    |
| ENSMUSG00000009798   | 4933404O12 | -0.054343589  | 0.000358273 | ENSMUSG000000037958   | Nasp1     | 0.103809033 | 0.00312632  | ENSMUSG000000028014 | Rap1h1     | -0.044366647 | 4.70E-14    | ENSMUSG000000034022  | Cap1       | 0.081928918 | 1.10E-05    |
| ENSMUSG00000002662   | Optn       | -0.054298749  | 0.00016076  | ENSMUSG000000005139   | Ncrp1     | 0.103284362 | 8.72E-15    | ENSMUSG000000025436 | Vamp5      | -0.044208525 | 6.61E-15    | ENSMUSG000000015289  | Lgsa1      | 0.081848195 | 0.001464773 |
| ENSMUSG000000019971  | Cap29b     | -0.054260749  | 0.019315693 | ENSMUSG000000045690   | Wdr89     | 0.102296602 | 0.012218937 | ENSMUSG000000043390 | Cmp1p      | -0.044192467 | 0.031417028 | ENSMUSG000000035258  | Abib3bp    | 0.081798652 | 1.42E-12    |
| ENSMUSG000000034127  | Tspan8     | -0.054225984  | 2.29E-20    | ENSMUSG000000004497   | Hdgf      | 0.102143025 | 3.14E-10    | ENSMUSG000000025436 | Atp23      | -0.043760111 | 0.00545803  | ENSMUSG000000022265  | Arnc1      | 0.081672655 | 2.17E-11    |
| ENSMUSG000000022747  | Arhgap1    | -0.053782236  | 5.25E-22    | ENSMUSG000000029061   | Mmp23     | 0.101815598 | 6.05E-07    | ENSMUSG000000023456 | Tpi1       | -0.043546417 | 8.89E-24    | ENSMUSG000000026434  | Nucle1     | 0.08148174  | 3.56E-12    |
| ENSMUSG0000000015143 | Actn1      | -0.053707860  | 7.61E-08    | ENSMUSG000000034602   | Mnc2      | 0.10112431  | 0.02836377  | ENSMUSG000000028409 | Smu1       | -0.043490996 | 0.001324359 | ENSMUSG000000027108  | Ola1       | 0.081320629 | 0.036211525 |
| ENSMUSG000000070493  | Chch2      | -0.053328553  | 3.59E-09    | ENSMUSG000000027893   | Ahoc1     | 0.100615876 | 6.67E-42    | ENSMUSG000000044030 | Hr2bp1     | -0.043336385 | 8.83E-05    | ENSMUSG000000017146  | Brcal      | 0.081320173 | 0.01746485  |
| ENSMUSG000000032216  | Cpi1       | -0.053192222  | 9.89E-24    | ENSMUSG00000000032578 | Hgb4      | 0.100139415 | 3.20E-10    | ENSMUSG000000006998 | Psm2d      | -0.042980921 | 0.000747486 | ENSMUSG000000048109  | Rbm15      | 0.081269852 | 0.035111468 |
| ENSMUSG000000020869  | Gpatch4    | -0.052922342  | 0.005724025 | ENSMUSG000000045854   | Lymr3     | 0.099915129 | 0.000464429 | ENSMUSG000000071041 | Impdh2-ps  | -0.042878722 | 0.008400777 | ENSMUSG000000028274  | Rngtt      | 0.081205322 | 0.030345526 |
| ENSMUSG000000020619  | Lchain     | -0.052835094  | 4.39E-14    | ENSMUSG000000027227   | Sord      | 0.099070748 | 1.15E-07    | ENSMUSG000000034687 | Fam17      | -0.042836219 | 1.89E-08    | ENSMUSG0000000066324 | Hivw2      | 0.081184466 | 0.001781606 |
| ENSMUSG000000022110  | Suc2a2     | -0.052791471  | 2.47E-14    | ENSMUSG0000000040891  | Foxa3     | 0.09963263  | 4.24E-09    | ENSMUSG000000021591 | Girx       | -0.042731552 | 0.025915895 | ENSMUSG000000097318  | 1700007L15 | 0.081132535 | 0.000497488 |
| ENSMUSG000000033675  | Eprs       | -0.052591428  | 2.06E-06    | ENSMUSG000000042709   | Atp2a2    | 0.099709042 | 0.002489915 | ENSMUSG000000031583 | Magk2k1    | -0.042689912 | 0.000172357 | ENSMUSG000000092517  | Arca2      | 0.080819276 | 0.000299797 |
| ENSMUSG000000032563  | Mrp3       | -0.052404617  | 0.002002491 | ENSMUSG000000040359   | Uhl1      | 0.099677382 | 0.001061874 | ENSMUSG000000021905 | Dph3       | -0.042412425 | 5.29E-06    | ENSMUSG0000000068299 | Narf4      | 0.080695826 | 0.000486813 |
| ENSMUSG000000032458  | Hgs        | -0.052337469  | 0.001014632 | ENSMUSG000000024769   | Cdc42bpg  | 0.099675173 | 5.10E-08    | ENSMUSG000000024944 | Ar12       | -0.042213766 | 0.017726467 | ENSMUSG000000071203  | Naip5      | 0.080690077 | 1.70E-29    |
| ENSMUSG000000030477  | Myrl1      | -0.052313884  | 6.26E-06    | ENSMUSG000000022462   | Slic38a2  | 0.099481579 | 5.82E-11    | ENSMUSG000000025788 | Zdhc3b     | -0.041868119 | 0.000922699 | ENSMUSG000000035704  | Alg8       | 0.080573055 | 0.00777756  |
| ENSMUSG000000010715  | Pgs1       | -0.052100878  | 0.034162871 | ENSMUSG000000021549   | Rasa1     | 0.099454415 | 0.026991512 | ENSMUSG000000018286 | Psm6b      | -0.041720782 | 0.004856104 | ENSMUSG00000006324   | Rbm12      | 0.080156566 | 0.001454991 |
| ENSMUSG000000003094  | Nup120     | -0.05202765   | 0.000841206 | ENSMUSG000000029229   | Chic2     | 0.099345436 | 0.025136461 | ENSMUSG000000023366 | Spz2a1a    | -0.041444625 | 9.05E-07    | ENSMUSG000000038650  | Lrr10      | 0.080130068 | 5.83E-07    |
| ENSMUSG000000011031  | Slic5a1    | -0.051982507  | 1.41E-34    | ENSMUSG000000020903   | Stx8      | 0.09925534  | 0.019730174 | ENSMUSG000000037681 | Ccp350     | -0.041384813 | 0.003242197 | ENSMUSG000000035212  | Rpnrt      | 0.080109507 | 0.043455949 |
| ENSMUSG000000055044  | Pdlim1     | -0.051856289  | 3.92E-27    | ENSMUSG000000022130   | Tgds      | 0.099218494 | 2.74E-05    | ENSMUSG000000038462 | Uqcrf1     | -0.041232256 | 5.70E-27    | ENSMUSG000000026946  | Nlr1       | 0.080106938 | 0.003139158 |
| ENSMUSG000000033675  | Ppp1r11    | -0.051750862  | 6.99E-10    | ENSMUSG000000021327   | Zkscan3   | 0.099063511 | 6.90E-05    | ENSMUSG000000039529 | Atp2b1     | -0.041134146 | 6.53E-23    | ENSMUSG000000030738  | Emc3       | 0.079598024 | 3.21E-15    |
| ENSMUSG000000014294  | Nudaf2     | -0.051550512  | 3.46E-08    | ENSMUSG000000023755   | Rheb1     | 0.098813889 | 1.43E-05    | ENSMUSG000000017688 | Hnf4g      | -0.041127379 | 1.83E-15    | ENSMUSG000000039105  | Atp6v1g1   | 0.079449033 | 0.016323964 |
| ENSMUSG000000033675  | Serbp1     | -0.051235749  | 0.011213722 | ENSMUSG000000026032   | Nudb3f    | 0.098634255 | 3.89E-12    | ENSMUSG000000028340 | Rab17      | -0.041092986 | 0.000775028 | ENSMUSG000000010057  | Npr12      | 0.079442821 | 0.005286484 |
| ENSMUSG0000000092203 | 1110038B12 | -0.051193065  | 0.000242296 | ENSMUSG000000059586   | Npmc2     | 0.098481877 | 0.054720225 | ENSMUSG000000065879 | Cpped1     | -0.040877766 | 3.34E-12    | ENSMUSG000000049439  | Cygd2a1    | 0.079387182 | 0.005286484 |
| ENSMUSG000000033839  | Gcc2       | -0.051183291  | 0.000123318 | ENSMUSG000000067150   | Npa5      | 0.098068679 | 0.009308408 | ENSMUSG000000030088 | Alch1n1    | -0.040779501 | 1.18E-07    | ENSMUSG000000038633  | Dcp1       | 0.079174234 | 0.001455949 |
| ENSMUSG00000004242   | Fgfr1op2   | -0.050839336  | 5.59E-05    | ENSMUSG000000032187   | Smarca4   | 0.097838584 | 5.21E-10    | ENSMUSG000000049171 | Smord13b   | -0.040726339 | 0.019286428 | ENSMUSG000000060679  | Dmp2       | 0.078984872 | 0.000223748 |
| ENSMUSG000000038650  | Rhm1       | -0.050839036  | 5.83E-07    | ENSMUSG000000026083   | Enf5b     | 0.097785117 | 2.62E-08    | ENSMUSG000000029048 | Per1       | -0.040715452 | 8.04E-05    | ENSMUSG000000033335  | Mmr9       | 0.078918927 | 1.42E-08    |
| ENSMUSG000000032316  | Nedd4      | -0.05050838   | 5.76E-10    | ENSMUSG000000025979   | Tob2      | 0.097776416 | 2.95E-05    | ENSMUSG000000032548 | Slic2a1    | -0.040370311 | 1.49E-09    | ENSMUSG000000001755  | Coasy      | 0.078813402 | 4.08E-06    |
| ENSMUSG000000033675  | Hmnp1u     | -0.05044851   | 4.44E-06    | ENSMUSG000000015755   | Mab4      | 0.097327144 | 1.79E-06    | ENSMUSG000000038302 | Ala17      | -0.04037428  | 0.016212652 | ENSMUSG000000023723  | Rbm23      | 0.078807927 | 3.64E-10    |
| ENSMUSG00000001971   | Hint3      | -0.050228305  | 3.02E-09    | ENSMUSG000000078963   | Hsp111    | 0.097057337 | 0.01282466  | ENSMUSG000000032092 | Mgfr2      | -0.040277912 | 0.000132731 | ENSMUSG000000078853  | Igtp       | 0.078485123 | 3.20E-24    |
| ENSMUSG000000036621  | Giao1      | -0.049888722  | 0.002468415 | ENSMUSG000000040383   | Aqr       | 0.096954865 | 2.87E-05    | ENSMUSG000000029999 | Tpfa       | -0.040233515 | 0.014346466 | ENSMUSG000000037995  | Igfbp      | 0.07812798  | 7.98E-09    |
| ENSMUSG000000078510  | 1110065P20 | -0.049975889  | 4.84E-06    | ENSMUSG000000033940   | Bk1       | 0.096343427 | 0.005311357 | ENSMUSG000000028538 | Nr5a2      | -0.040138769 | 3.09E-20    | ENSMUSG000000025782  | Taf2       | 0.077984459 | 0.000248451 |
| ENSMUSG000000071111  | Kdelr2     | -0.049917436  | 0.000124785 | ENSMUSG000000030299   | Mpr4      | 0.09614875  | 2.18E-07    | ENSMUSG000000026357 | Rnf11      | -0.039949778 | 0.000444132 | ENSMUSG000000060149  | Co202059   | 0.07760568  | 0.001291087 |
| ENSMUSG000000025173  | Wdr45b     | -0.049656295  | 0.027059533 | ENSMUSG000000038415   | Uba1      | 0.095910229 | 0.18622287  | ENSMUSG000000038206 | Fvbn8      | -0.039543154 | 0.01149584  | ENSMUSG000000005148  | Klf5       | 0.077393346 | 3.77E-15    |
| ENSMUSG000000033435  | Gtzh25     | -0.048916923  | 1.04E-10    | ENSMUSG000000031311   | Nono      | 0.095651597 | 0.03877031  | ENSMUSG00000004486  | Fbn1       | -0.039398907 | 0.021047305 | ENSMUSG000000045107  | Rfxd1      | 0.077274593 | 0.014292265 |
| ENSMUSG000000070343  | Atoh1      | -0.048741866  | 0.000105556 | ENSMUSG000000042520   | Ubaq2l    | 0.095430325 | 0.01897836  | ENSMUSG000000017607 | Tns4       | -0.039293363 | 9.60E-12    | ENSMUSG000000045624  | Esf1       | 0.077149995 | 4.31E-05    |
| ENSMUSG000000050625  | Psm4d      | -0.048570311  | 2.83E-08    | ENSMUSG000000041439   | Mfrd5     | 0.095274713 | 3.55E-09    | ENSMUSG000000027077 | Srgn       | -0.039287592 | 0.002054823 | ENSMUSG000000041020  | Fam117b    | 0.076781457 | 1.25E-16    |
| ENSMUSG000000038991  | Tnxd5      | -0.048565699  | 2.70E-06    | ENSMUSG000000030551   | Nr2r2     | 0.094944197 | 3.84E-21    | ENSMUSG000000029169 | Hdh15      | -0.038936337 | 0.000100504 | ENSMUSG000000049038  | Mterf2     | 0.076688013 | 9.87E-15    |
| ENSMUSG000000029552  | Tse5       | -0.048205991  | 0.011356575 | ENSMUSG000000044026   | Slic35g1  | 0.094519138 | 0.010737349 | ENSMUSG000000022095 | Ptdes2     | -0.038661673 | 0.026192841 | ENSMUSG000000052459  | Atp6v1a    | 0.076578414 | 8.19E-05    |
| ENSMUSG000000021144  | Mta1       | -0.048175762  | 0.013022277 | ENSMUSG000000020653   | Klf11     | 0.094519138 | 0.010737349 | ENSMUSG000000052248 | Ptdes2     | -0.038602174 | 0.025578678 | ENSMUSG000000005506  | Celf1      | 0.076550886 | 4.60E-06    |
| ENSMUSG000000029648  | Fgfr2      | -0.04817113   | 0.017722889 | ENSMUSG000000044026   | Slic35g1  | 0.094519138 | 0.010737349 | ENSMUSG000000052248 | Ptdes2     | -0.038602174 | 0.025578678 | ENSMUSG000000033707  | Lrrc2a     | 0.076505625 | 0.0180397   |
| ENSMUSG000000029647  | Atp2a2     | -0.047982964  | 8.20E-13    | ENSMUSG000000044496   | 251039B18 | 0.094455374 | 9.53E-05    | ENSMUSG00000004884  | Seif2      | -0.038559996 | 4.23E-14    | ENSMUSG000000071078  | Nr2c2ap    | 0.076381469 | 0.03026740  |
| ENSMUSG000000029687  | Fmc1       | -0.047847971  | 3.45E-13    | ENSMUSG000000010054   | Tusc2     | 0.094342656 | 7.88E-06    | ENSMUSG00000004786  | Ubi5       | -0.038408447 | 7.86E-05    | ENSMUSG000000021993  | Mmpap      | 0.076369702 | 0.017466762 |
| ENSMUSG00000         |            |               |             |                       |           |             |             |                     |            |              |             |                      |            |             |             |

|                      |            |              |             |                      |            |             |             |                     |              |              |                      |                      |             |             |             |
|----------------------|------------|--------------|-------------|----------------------|------------|-------------|-------------|---------------------|--------------|--------------|----------------------|----------------------|-------------|-------------|-------------|
| ENSMUSG000000071078  | Jund       | -0.036483154 | 4.33E-07    | ENSMUSG00000001240   | Abod4      | 0.083833219 | 0.00046332  | ENSMUSG000000056116 | H2-T22       | -0.028704397 | 0.009414367          | ENSMUSG000000032059  | Alg9r       | 0.067827413 | 0.047208109 |
| ENSMUSG000000038034  | Igf8f      | -0.03624397  | 0.000319862 | ENSMUSG000000039826  | Tru2b      | 0.083783053 | 4.57E-14    | ENSMUSG000000028780 | Sema3c       | -0.028482551 | 4.13E-05             | ENSMUSG000000027940  | Hpm3        | 0.06769932  | 0.005704977 |
| ENSMUSG000000005763  | Ipk1       | -0.036231921 | 0.000347415 | ENSMUSG000000022353  | Msu1a      | 0.083417    | 0.026569206 | ENSMUSG000000026760 | Sic22a2      | -0.02862586  | 0.013807886          | ENSMUSG000000092110  | Tn10        | 0.067641217 | 0.001010065 |
| ENSMUSG000000021936  | Mapk8      | -0.036092566 | 2.08E-17    | ENSMUSG000000027668  | Mfn1       | 0.083398712 | 0.000894211 | ENSMUSG000000021458 | Aocpe        | -0.02801321  | 0.047070061          | ENSMUSG000000032827  | Ppp19a      | 0.06762878  | 0.000412672 |
| ENSMUSG000000015831  | Ersp1      | -0.03599518  | 0.02423143  | ENSMUSG000000032481  | Smrccr     | 0.08337909  | 1.50E-06    | ENSMUSG000000018604 | Tbx3         | -0.027875581 | 0.000400006          | ENSMUSG000000024769  | Cdc42bpg    | 0.06758951  | 5.10E-08    |
| ENSMUSG000000019961  | Tmpo       | -0.035864981 | 0.049233269 | ENSMUSG000000022346  | Myc        | 0.083273984 | 0.000512097 | ENSMUSG000000029189 | Sel13        | -0.027833618 | 6.42E-14             | ENSMUSG000000035429  | Ptphr       | 0.067190266 | 0.000245171 |
| ENSMUSG000000002947  | Ppml1g     | -0.035749538 | 0.029605337 | ENSMUSG000000038495  | Outd7b     | 0.08314415  | 0.035739845 | ENSMUSG000000024503 | Sfr3b2       | -0.027735653 | 1.24E-06             | ENSMUSG000000031430  | Abca3       | 0.067190266 | 2.72E-06    |
| ENSMUSG000000030806  | Osbp5      | -0.035710005 | 0.000486162 | ENSMUSG000000057738  | Sptan1     | 0.0830172   | 3.54E-09    | ENSMUSG000000027630 | Tb11x1r      | -0.027431012 | 5.17E-08             | ENSMUSG0000000202396 | Ocal1       | 0.06685686  | 0.001401274 |
| ENSMUSG000000000635  | Mtd1tp1    | -0.035645475 | 0.000665654 | ENSMUSG000000120113  | Fam120aas  | 0.08279681  | 0.005286844 | ENSMUSG000000027958 | Cabin1       | -0.027095037 | 0.016519329          | ENSMUSG000000022807  | Osph11      | 0.066687579 | 0.001421078 |
| ENSMUSG000000020190  | Mlnk2      | -0.035114087 | 0.00037279  | ENSMUSG000000026623  | Lpgt1a     | 0.082432256 | 2.14E-20    | ENSMUSG000000018501 | Ncor1        | -0.026964225 | 0.013862877          | ENSMUSG000000032366  | Tpm1        | 0.066578636 | 0.000469479 |
| ENSMUSG000000002893  | Sh3bgr3    | -0.0346502   | 8.00E-07    | ENSMUSG000000030402  | Lqbp111    | 0.08239878  | 1.66E-07    | ENSMUSG000000020840 | Blmh         | -0.026791617 | 1.17E-06             | ENSMUSG000000032526  | Ss182       | 0.066494313 | 1.73E-08    |
| ENSMUSG0000000028847 | Trapp3c    | -0.034575322 | 0.024835519 | ENSMUSG000000020516  | Rps6kb1    | 0.08236459  | 0.004630545 | ENSMUSG000000030814 | Calr         | -0.026625737 | 0.000231859          | ENSMUSG000000047409  | Ctdsp1      | 0.066351533 | 1.09E-27    |
| ENSMUSG0000000022884 | Erf4e2     | -0.034299433 | 1.79E-08    | ENSMUSG000000030785  | Cow2a2     | 0.082335641 | 0.023413671 | Tsc22d1             | -0.026550836 | 1.25E-21     | ENSMUSG000000023908  | Pkmyt1               | 0.065894857 | 0.010111192 |             |
| ENSMUSG000000020577  | Tspan13    | -0.033870338 | 1.14E-16    | ENSMUSG000000040370  | Etrf1r     | 0.082262616 | 3.04E-09    | Dab1                | -0.026325362 | 0.041862076  | ENSMUSG000000032590  | Aph                  | 0.064884327 | 0.004087097 |             |
| ENSMUSG0000000092417 | Rpac1      | -0.033538899 | 3.31E-09    | ENSMUSG000000001665  | Rbp1       | 0.08219359  | 1.10E-06    | Cicab1              | -0.026251974 | 2.05E-12     | ENSMUSG000000032943  | Ubn1                 | 0.064867442 | 4.89E-08    |             |
| ENSMUSG0000000001847 | Ganc1      | -0.033422135 | 4.47E-15    | ENSMUSG0000000095026 | Gct33      | 0.081647132 | 0.004129941 | Kars                | -0.02621501  | 0.013622843  | ENSMUSG000000021693  | Kir2a                | 0.064482602 | 0.039418915 |             |
| ENSMUSG0000000017655 | Ubn1n1     | -0.033219845 | 0.033221993 | ENSMUSG0000000002422 | Lqbp111    | 0.081406329 | 3.89E-08    | Mdp1                | -0.025966368 | 7.05E-12     | ENSMUSG0000000091957 | Rps2-ps10            | 0.064252731 | 0.036496931 |             |
| ENSMUSG0000000022884 | Rps27r1    | -0.033108605 | 0.000578538 | ENSMUSG000000002661  | Alkdh7     | 0.081058623 | 8.54E-05    | Ham120a             | -0.025741313 | 0.003597092  | ENSMUSG000000039656  | Wnk4                 | 0.063851387 | 0.030617777 |             |
| ENSMUSG0000000021473 | Cry11      | -0.033032693 | 1.26E-16    | ENSMUSG0000000020440 | Arf5       | 0.080948993 | 4.07E-29    | Zdhc2c              | -0.025701921 | 6.57E-08     | ENSMUSG000000024056  | Ndc80                | 0.063522876 | 0.007864052 |             |
| ENSMUSG000000004595  | Fam199x    | -0.032759997 | 3.04E-05    | ENSMUSG000000030231  | Plekha5    | 0.08064519  | 0.002866535 | Rnp11c3b2           | -0.02563786  | 0.049500279  | ENSMUSG000000027397  | Sic20a1              | 0.063422689 | 0.033783473 |             |
| ENSMUSG000000006473  | Irak2      | -0.032619058 | 0.009081943 | ENSMUSG000000020709  | Adap2      | 0.080595246 | 0.02980846  | Cnpy4               | -0.025501285 | 0.046330648  | ENSMUSG000000026254  | Eef2                 | 0.063379309 | 1.33E-06    |             |
| ENSMUSG000000007043  | Cldn3      | -0.032386932 | 0.00989859  | ENSMUSG000000018677  | Sic25a9    | 0.080487542 | 0.004225507 | Mlnk2os             | -0.025484132 | 0.00103785   | ENSMUSG000000032757  | Bat1                 | 0.063271376 | 3.57E-14    |             |
| ENSMUSG000000015575  | Atp6v0e    | -0.032243016 | 4.88E-10    | ENSMUSG000000030339  | Lrrc       | 0.08042046  | 3.95E-20    | ENSMUSG000000028228 | Cpnc3        | -0.025408784 | 0.040412823          | ENSMUSG000000028080  | Lgr6        | 0.063206934 | 0.019730174 |
| ENSMUSG000000000635  | Erf4e2     | -0.032105024 | 0.031417028 | ENSMUSG000000000278  | Sec22b     | 0.080413404 | 1.14E-21    | Tmt11c              | -0.025315663 | 0.007005825  | ENSMUSG000000032054  | Itga                 | 0.063192679 | 0.020759533 |             |
| ENSMUSG000000050407  | Cest1c     | -0.032038821 | 1.00E-05    | ENSMUSG0000000307710 | Cisd1      | 0.080153736 | 4.48E-13    | Aug5                | -0.024984565 | 0.040183167  | ENSMUSG000000040822  | 170012320C           | 0.063079464 | 0.001268452 |             |
| ENSMUSG000000003561  | Tmem18     | -0.031935247 | 0.00010538  | ENSMUSG000000000278  | Scpp1      | 0.079838778 | 3.18E-07    | ENSMUSG000000057410 | Pist1        | -0.024941574 | 1.37E-10             | ENSMUSG000000023915  | Tfnr21      | 0.062950062 | 0.000575101 |
| ENSMUSG000000053768  | Chchd3     | -0.031852417 | 9.25E-16    | ENSMUSG000000026356  | Dars       | 0.079312179 | 0.001057081 | ENSMUSG000000031948 | Mzt1         | -0.024860991 | 0.032357396          | ENSMUSG000000025651  | Uqcr1       | 0.062777092 | 4.38E-07    |
| ENSMUSG0000000032062 | 213003G06  | -0.031523491 | 0.007489876 | ENSMUSG000000026796  | Niban2     | 0.079254168 | 0.019777922 | ENSMUSG000000070394 | Tmem556      | -0.024770266 | 4.29E-05             | ENSMUSG000000021930  | Spyr7       | 0.062470895 | 6.51E-15    |
| ENSMUSG0000000020882 | Nemf       | -0.031194124 | 0.034162871 | ENSMUSG000000039523  | Cep104     | 0.079063777 | 0.010270674 | ENSMUSG000000021278 | Rmn          | -0.024603308 | 5.28E-09             | ENSMUSG000000029394  | Cdk2ap1     | 0.062469312 | 8.14E-06    |
| ENSMUSG000000003445  | Spec11c    | -0.03128924  | 0.00394825  | ENSMUSG000000006818  | Soc2       | 0.079020086 | 0.000144226 | ENSMUSG000000037896 | Arrc1        | -0.024576968 | 7.09E-06             | ENSMUSG000000032966  | Fkbp1a      | 0.06242975  | 0.003710054 |
| ENSMUSG000000034445  | Pgp        | -0.031265504 | 1.75E-10    | ENSMUSG000000015501  | Hivp2c     | 0.078849102 | 0.001781606 | ENSMUSG000000037492 | Zmat4        | -0.024499247 | 2.63E-05             | ENSMUSG000000071502  | Tmem139     | 0.062331539 | 7.36E-11    |
| ENSMUSG000000003460  | Tirap      | -0.030926059 | 8.23E-10    | ENSMUSG000000056228  | Cars2      | 0.078762647 | 0.019777922 | ENSMUSG000000047454 | Gphn         | -0.024420308 | 6.44E-06             | ENSMUSG000000032606  | Rf1         | 0.062091018 | 0.002074568 |
| ENSMUSG000000061613  | U2af1      | -0.030727317 | 8.87E-09    | ENSMUSG000000025102  | 113104ON11 | 0.078299996 | 0.010951921 | ENSMUSG000000029672 | Fam3c        | -0.024388295 | 0.006536428          | ENSMUSG000000023852  | Chd1        | 0.061877807 | 0.002773712 |
| ENSMUSG000000000465  | Fchra2     | -0.029946589 | 0.013594725 | ENSMUSG000000021693  | Kir2a      | 0.078295961 | 0.039418915 | ENSMUSG000000029612 | Bsg          | -0.024329642 | 1.98E-04             | ENSMUSG000000038611  | Phf1        | 0.0618704   | 0.024130871 |
| ENSMUSG000000030432  | Rpl28      | -0.029780727 | 1.69E-05    | ENSMUSG000000067297  | Htt1b12    | 0.078163715 | 3.38E-17    | ENSMUSG000000029580 | Actb         | -0.023904604 | 4.38E-06             | ENSMUSG000000034088  | Htdp2       | 0.061853769 | 0.015555348 |
| ENSMUSG000000000376  | Tspan31    | -0.029720459 | 5.52E-05    | ENSMUSG000000032092  | Mpc2       | 0.078156510 | 0.000132371 | ENSMUSG000000030465 | Pan3         | -0.023900264 | 0.00067234           | ENSMUSG000000029640  | Hdn2        | 0.061800022 | 0.002323728 |
| ENSMUSG0000000040209 | Zfp704     | -0.029571342 | 1.79E-08    | ENSMUSG000000038267  | Tsc22a3    | 0.077556754 | 4.78E-10    | ENSMUSG000000044048 | Rpl35a       | -0.023832706 | 4.42E-06             | ENSMUSG000000029422  | Rerc2       | 0.061625924 | 0.016143166 |
| ENSMUSG0000000002916 | Eed        | -0.029413689 | 8.36E-09    | ENSMUSG000000033429  | Moe        | 0.077227764 | 0.008082717 | ENSMUSG000000045287 | Rhm1a1       | -0.023770798 | 5.24E-22             | ENSMUSG000000025135  | Anapc1      | 0.06153858  | 0.00168149  |
| ENSMUSG0000000227173 | Depcd7     | -0.029297625 | 0.000519157 | ENSMUSG000000019558  | Sic8a8     | 0.077213297 | 0.016400404 | ENSMUSG000000018339 | Targ2c       | -0.023606816 | 0.001895881          | ENSMUSG000000026399  | Cd55        | 0.061536884 | 0.000128063 |
| ENSMUSG0000000087017 | Alb62270   | -0.029012611 | 0.049609771 | ENSMUSG000000033918  | Par1       | 0.077181968 | 0.005554182 | ENSMUSG000000025409 | C1cbp        | -0.023528099 | 0.022814218          | ENSMUSG000000024539  | Ptdn2       | 0.061490339 | 0.005899217 |
| ENSMUSG000000008809  | A930011G23 | -0.028973292 | 0.000130203 | ENSMUSG000000050732  | Lamp8      | 0.077034022 | 3.69E-08    | ENSMUSG000000020163 | Uqcr1        | -0.023329348 | 8.06E-14             | ENSMUSG000000019952  | Poc1b       | 0.061478705 | 3.67E-05    |
| ENSMUSG000000023235  | Cd25       | -0.028758099 | 0.000194839 | ENSMUSG000000022257  | Ltrfm4b    | 0.07690283  | 3.20E-10    | ENSMUSG000000042323 | Ppp11        | -0.023254554 | 0.000232559          | ENSMUSG000000037740  | Mpr26       | 0.061403696 | 0.002339570 |
| ENSMUSG000000041571  | Selenow    | -0.027851908 | 1.28E-07    | ENSMUSG000000041607  | Mbp        | 0.076878296 | 0.002868631 | ENSMUSG000000031924 | Cybb5        | -0.023245965 | 9.96E-33             | ENSMUSG000000089764  | Gm16580     | 0.06074017  | 0.01655775  |
| ENSMUSG000000000680  | Km10250    | -0.027687255 | 1.26E-20    | ENSMUSG000000019578  | Ubnm6      | 0.076585495 | 0.002340762 | ENSMUSG000000028436 | Prkab1       | -0.023030639 | 9.09E-20             | ENSMUSG000000042745  | Id1         | 0.060737037 | 1.86E-18    |
| ENSMUSG000000002490  | Picb3      | -0.027616281 | 0.002032081 | ENSMUSG000000028212  | Flii       | 0.07655292  | 9.31E-07    | ENSMUSG000000030866 | Ecd2ap       | -0.022988803 | 9.57E-10             | ENSMUSG000000037361  | Sfr3b6      | 0.060716533 | 0.015154516 |
| ENSMUSG000000022286  | Ppm1j      | -0.027444164 | 1.31E-41    | ENSMUSG000000038766  | Gap2b2     | 0.076483386 | 6.91E-08    | ENSMUSG000000061665 | Cdr2ap       | -0.022575692 | 2.35E-19             | ENSMUSG000000033943  | Mga         | 0.0605898   | 0.017890285 |
| ENSMUSG000000024108  | Rpk1       | -0.027432384 | 0.019682395 | ENSMUSG00000001632   | Bpr1       | 0.075943602 | 2.33E-06    | ENSMUSG000000040170 | Fmo2c        | -0.022529924 | 6.39E-09             | ENSMUSG000000021375  | Kir13a      | 0.06047473  | 8.53E-14    |
| ENSMUSG000000052837  | Junb       | -0.027273274 | 0.000411437 | ENSMUSG000000019907  | Ppp112a    | 0.075873426 | 5.98E-08    | ENSMUSG000000015575 | Atp6v0e      | -0.022233849 | 4.88E-10             | ENSMUSG000000032932  | Hgap3       | 0.060309984 | 0.002339371 |
| ENSMUSG0000000301059 | Ndufb1n1   | -0.027184464 | 5.44E-08    | ENSMUSG000000104445  | Rhbg       | 0.075811203 | 0.005445631 | ENSMUSG000000025416 | Tb11x        | -0.022122932 | 5.13E-07             | ENSMUSG000000024683  | Mrp16       | 0.060295954 | 8.90E-05    |
| ENSMUSG000000033639  | Ndufb1     | -0.027061484 | 4.47E-09    | ENSMUSG000000030311  | Zbtb7a     | 0.075511859 | 4.68E-11    | ENSMUSG00000008655  | Erf4b        | -0.021820627 | 7.57E-07             | Fau                  | 0.059996051 | 2.06E-05    |             |
| ENSMUSG000000027673  | Ndufb5     | -0.026771381 | 3.43E-09    | ENSMUSG000000040264  | Phb2       | 0.075045769 | 0.002246891 | ENSMUSG000000045980 | Tmem104      | -0.021803566 | 0.030993454          | ENSMUSG000000021065  | Fut8        | 0.059724467 | 3.85E-06    |
| ENSMUSG000000034647  | Xpot       | -0.02627608  | 0.030819374 | ENSMUSG000000032384  | Cenkg1     | 0.075038241 | 0.00099799  | ENSMUSG00000001280  | Spl1         | -0.02172373  | 3.30E-11             | ENSMUSG000000050747  | Fam136a     | 0.059535895 | 5.49E-10    |

|                       |             |              |             |
|-----------------------|-------------|--------------|-------------|
| ENSMUSG00000005881    | Ergic3      | -0.015302408 | 1.96E-05    |
| ENSMUSG00000002264    | Slic5a5     | -0.01529597  | 0.020832341 |
| ENSMUSG000000040139   | B430038101F | -0.015097419 | 4.16E-13    |
| ENSMUSG000000001149   | Gltbp4      | -0.015016408 | 0.011885359 |
| ENSMUSG00000003375    | Yip1f       | -0.014456313 | 0.002666373 |
| ENSMUSG00000003273    | Sfr3b3      | -0.014211724 | 0.023833086 |
| ENSMUSG000000006823   | Csde1       | -0.013839943 | 6.54E-05    |
| ENSMUSG000000041765   | Uba2c       | -0.013997171 | 0.049040342 |
| ENSMUSG000000009289   | Atpv0a2     | -0.013839943 | 2.00E-07    |
| ENSMUSG000000069900   | Sudc3       | -0.013768055 | 2.94E-06    |
| ENSMUSG000000003729   | Ankrd13c    | -0.01362406  | 0.0149584   |
| ENSMUSG000000004221   | Grsf1       | -0.013622632 | 0.041878331 |
| ENSMUSG000000002611   | Unc50       | -0.013620376 | 0.16404004  |
| ENSMUSG000000058446   | Znrp2       | -0.013310559 | 3.10E-06    |
| ENSMUSG0000000023277  | Twf2        | -0.013059294 | 0.002820919 |
| ENSMUSG0000000024927  | Rela        | -0.012965487 | 0.00771235  |
| ENSMUSG0000000057933  | Gata2       | -0.012554536 | 3.55E-39    |
| ENSMUSG0000000032193  | Ldlr        | -0.012156737 | 1.02E-12    |
| ENSMUSG00000000373    | Rabba       | -0.01151101  | 3.60E-12    |
| ENSMUSG0000000018559  | Ctdnpe1     | -0.011272617 | 0.000385292 |
| ENSMUSG000000003249   | Phospho2    | -0.011008855 | 6.76E-06    |
| ENSMUSG000000002733   | Nhrf1       | -0.010948503 | 8.62E-07    |
| ENSMUSG0000000038534  | Osbp17      | -0.010242719 | 1.57E-10    |
| ENSMUSG0000000025757  | Hspu4l1     | -0.010223413 | 0.004132785 |
| ENSMUSG0000000039289  | Gadk45a     | -0.010163628 | 5.86E-06    |
| ENSMUSG0000000042043  | Tbca        | -0.009808652 | 1.34E-07    |
| ENSMUSG0000000037262  | Kin         | -0.009349024 | 0.047903534 |
| ENSMUSG0000000004394  | Tmed4       | -0.009348416 | 6.19E-18    |
| ENSMUSG0000000059193  | Edr579e     | -0.008980665 | 9.19E-13    |
| ENSMUSG0000000021033  | Gatz1       | -0.008491222 | 2.52E-09    |
| ENSMUSG000000003249   | Larlp4b     | -0.008322165 | 0.005845741 |
| ENSMUSG000000004222   | Tns3        | -0.008180544 | 3.58E-08    |
| ENSMUSG000000004373   | Ptpn11      | -0.007849113 | 0.027753045 |
| ENSMUSG0000000026321  | Tnfrsf11a   | -0.007738369 | 9.01E-11    |
| ENSMUSG0000000037262  | Soccs2      | -0.007772416 | 1.42E-05    |
| ENSMUSG0000000028691  | Pdxk1       | -0.007688374 | 0.006194536 |
| ENSMUSG0000000000168  | Atkl3bp     | -0.007446748 | 1.42E-12    |
| ENSMUSG0000000032350  | Gdc         | -0.006786548 | 9.32E-15    |
| ENSMUSG00000000018765 | Dlat        | -0.006761373 | 6.09E-19    |
| ENSMUSG0000000020706  | Ftj3        | -0.006728204 | 0.0024207   |
| ENSMUSG0000000024935  | Alb87944    | -0.006623805 | 0.000882417 |
| ENSMUSG0000000005469  | Pkica       | -0.006357145 | 0.000734215 |
| ENSMUSG0000000078945  | Nap2        | -0.006261833 | 0.005131288 |
| ENSMUSG0000000022754  | Slic1a1     | -0.006021082 | 5.96E-40    |
| ENSMUSG0000000008827  | Tpd5212     | -0.005832872 | 0.000759036 |
| ENSMUSG0000000005580  | Rnf181      | -0.005784547 | 0.025456237 |
| ENSMUSG0000000021279  | Cdc42bpb    | -0.005745017 | 1.76E-05    |
| ENSMUSG0000000028032  | Sdc1        | -0.005539661 | 4.25E-15    |
| ENSMUSG0000000015337  | Endog       | -0.005487315 | 6.86E-08    |
| ENSMUSG0000000028032  | Papss1      | -0.005376835 | 2.18E-26    |
| ENSMUSG0000000004248  | Caprin1     | -0.005050738 | 0.042573484 |
| ENSMUSG0000000056808  | Chd9        | -0.004773064 | 0.013314373 |
| ENSMUSG0000000035674  | Ndrf4a      | -0.004695317 | 6.19E-12    |
| ENSMUSG0000000026289  | Atg16l1     | -0.004616845 | 0.001333094 |
| ENSMUSG0000000028426  | Rad23b      | -0.004222551 | 6.97E-05    |
| ENSMUSG0000000022724  | Mkks        | -0.004030755 | 9.17E-05    |
| ENSMUSG0000000037023  | Cla3b       | -0.003871788 | 3.66E-60    |
| ENSMUSG0000000039205  | Ciz1        | -0.003871536 | 0.008543078 |
| ENSMUSG0000000055435  | Codf        | -0.003857637 | 1.27E-12    |
| ENSMUSG0000000040173  | Mafc        | -0.003645275 | 0.000270554 |
| ENSMUSG0000000037501  | Itpkc       | -0.00347896  | 5.54E-05    |
| ENSMUSG0000000024867  | Pip5k1b     | -0.003440467 | 0.000248211 |
| ENSMUSG0000000029528  | Pxm         | -0.002488109 | 0.006328797 |
| ENSMUSG0000000032803  | Cdv3        | -0.002436561 | 1.50E-10    |
| ENSMUSG0000000079507  | H2-Q1       | -0.002395383 | 0.000937765 |
| ENSMUSG0000000026753  | Ppp6c       | -0.002009203 | 0.036167935 |
| ENSMUSG000000006362   | Med8        | -0.001908908 | 0.007058908 |
| ENSMUSG0000000039159  | Ube2h       | -0.001769451 | 3.59E-05    |
| ENSMUSG0000000024732  | Cdc8b       | -0.001232288 | 0.010158039 |
| ENSMUSG0000000030362  | Stand3nl    | -0.000387591 | 0.017189204 |

|                       |           |              |             |
|-----------------------|-----------|--------------|-------------|
| ENSMUSG000000001786   | Fbw7      | 0.061275584  | 0.027264864 |
| ENSMUSG0000000032348  | Gata4     | 0.060691223  | 1.11E-28    |
| ENSMUSG00000000023341 | Mxd2      | 0.060596996  | 0.002020061 |
| ENSMUSG0000000017307  | Aco2      | 0.060397793  | 0.001388687 |
| ENSMUSG0000000017000  | Mut8      | 0.060296501  | 7.50E-18    |
| ENSMUSG0000000024955  | Eppa      | 0.060195918  | 5.68E-07    |
| ENSMUSG0000000030894  | Tarr1     | 0.05995422   | 0.000651315 |
| ENSMUSG0000000046417  | Lrrc75a   | 0.059902065  | 0.004147725 |
| ENSMUSG0000000031545  | Gp4a      | 0.059371206  | 0.000181809 |
| ENSMUSG0000000026303  | Mlph      | 0.058918178  | 1.53E-09    |
| ENSMUSG0000000030539  | Sema4b    | 0.058874053  | 1.86E-06    |
| ENSMUSG0000000039364  | Sectm1b   | 0.058862173  | 7.16E-06    |
| ENSMUSG0000000061559  | Ski8c     | 0.058693221  | 0.001862014 |
| ENSMUSG0000000030536  | Igkap1    | 0.058595158  | 0.025806961 |
| ENSMUSG0000000028990  | Lzic      | 0.05848002   | 2.00E-10    |
| ENSMUSG0000000021650  | Pctcd2    | 0.058313451  | 0.045106406 |
| ENSMUSG0000000025337  | Sbds      | 0.058296575  | 1.84E-22    |
| ENSMUSG0000000027599  | Armc1     | 0.058243251  | 0.012869605 |
| ENSMUSG0000000038668  | Lprp1     | 0.058160434  | 9.83E-09    |
| ENSMUSG0000000042506  | Usp22     | 0.0577788157 | 0.000193765 |
| ENSMUSG0000000041757  | Plekha8   | 0.05766314   | 2.96E-13    |
| ENSMUSG0000000038365  | Fbx25     | 0.057135183  | 0.004424072 |
| ENSMUSG0000000028008  | Asic5     | 0.057049142  | 0.009523982 |
| ENSMUSG0000000038335  | Tsr1      | 0.056956105  | 3.62E-05    |
| ENSMUSG0000000027765  | Snap29    | 0.056708309  | 0.002473558 |
| ENSMUSG0000000007827  | Ankrd26   | 0.05666823   | 0.009790995 |
| ENSMUSG000000006275   | Ppp1r7    | 0.056605724  | 0.000620703 |
| ENSMUSG0000000027230  | Creb3l1   | 0.056592733  | 2.04E-16    |
| ENSMUSG0000000026667  | Uhmk1     | 0.05599132   | 5.81E-05    |
| ENSMUSG0000000032226  | Gmrt3     | 0.055672859  | 8.39E-13    |
| ENSMUSG0000000036952  | Lprp1     | 0.055495134  | 0.000170658 |
| ENSMUSG0000000029735  | Tpk1      | 0.055458783  | 0.001234225 |
| ENSMUSG0000000005397  | Ngk1      | 0.055356649  | 0.014772576 |
| ENSMUSG0000000066324  | Bprt2     | 0.055185991  | 1.41E-17    |
| ENSMUSG0000000070697  | Soccs2    | 0.055026683  | 0.003453114 |
| ENSMUSG0000000004040  | Stat3     | 0.054919935  | 0.000148257 |
| ENSMUSG0000000019278  | Dppp1     | 0.054622493  | 1.01E-17    |
| ENSMUSG0000000060703  | Cd32      | 0.054438502  | 1.20E-14    |
| ENSMUSG0000000059811  | Cd20      | 0.054429232  | 1.51E-13    |
| ENSMUSG0000000032185  | Cam1      | 0.054181916  | 0.007445477 |
| ENSMUSG0000000048534  | Jarid1a   | 0.054172155  | 3.63E-12    |
| ENSMUSG0000000036959  | Bcor1     | 0.054012989  | 0.000579926 |
| ENSMUSG0000000041870  | Ankrd13a  | 0.053998646  | 1.73E-11    |
| ENSMUSG0000000019505  | Ubb       | 0.053971353  | 1.55E-05    |
| ENSMUSG0000000017774  | Myo1c     | 0.053671415  | 0.000278975 |
| ENSMUSG0000000036214  | Polr1a    | 0.053558562  | 9.27E-07    |
| ENSMUSG0000000031556  | Tmd2      | 0.053552246  | 0.004759227 |
| ENSMUSG0000000022437  | Sarmn50   | 0.053487117  | 0.008000815 |
| ENSMUSG0000000022827  | Rab3      | 0.053383393  | 0.014528976 |
| ENSMUSG0000000021807  | Rtraf     | 0.053210222  | 1.80E-07    |
| ENSMUSG000000007554   | Lgla8b    | 0.053162715  | 1.80E-07    |
| ENSMUSG0000000007670  | Khrp      | 0.053060223  | 4.83E-08    |
| ENSMUSG0000000026922  | Agpat2    | 0.052826305  | 7.57E-05    |
| ENSMUSG0000000042487  | Leo1      | 0.052325718  | 0.0068694   |
| ENSMUSG0000000030738  | Gab2      | 0.052082305  | 1.28E-08    |
| ENSMUSG000000001739   | Cldn15    | 0.052044049  | 9.23E-06    |
| ENSMUSG0000000030738  | Yif1a     | 0.051770976  | 3.21E-15    |
| ENSMUSG0000000030200  | Bcl2l14   | 0.051712806  | 1.36E-19    |
| ENSMUSG0000000024942  | Capn1     | 0.051579795  | 0.025146621 |
| ENSMUSG0000000069520  | Tmem19    | 0.051431926  | 0.000242749 |
| ENSMUSG0000000027646  | Sic1      | 0.051390447  | 0.001157494 |
| ENSMUSG0000000044768  | Macir     | 0.051192904  | 0.0460451   |
| ENSMUSG0000000025467  | Prap1     | 0.051158559  | 5.66E-85    |
| ENSMUSG0000000043705  | Capn13    | 0.050995411  | 6.02E-08    |
| ENSMUSG000000113198   | Gm988     | 0.050891698  | 0.007850221 |
| ENSMUSG000000018931   | Natd1     | 0.050782767  | 0.00751999  |
| ENSMUSG0000000020923  | Ubr1f     | 0.050720308  | 0.001666651 |
| ENSMUSG000000018398   | Septin8   | 0.050675566  | 3.24E-16    |
| ENSMUSG000000036402   | Gng12     | 0.050485163  | 0.01434852  |
| ENSMUSG0000000025135  | Anapc11   | 0.050445856  | 0.003168019 |
| ENSMUSG0000000041837  | Pdcd7     | 0.050112237  | 0.043831375 |
| ENSMUSG000000053819   | Camk2d    | 0.050111167  | 2.97E-15    |
| ENSMUSG000000042599   | Kdm7a     | 0.049598642  | 0.000185654 |
| ENSMUSG0000000020483  | Dynl12    | 0.049580072  | 0.02430588  |
| ENSMUSG000000052748   | Swt1      | 0.049361458  | 2.78E-05    |
| ENSMUSG000000036112   | Metap2    | 0.049280375  | 4.56E-07    |
| ENSMUSG000000039318   | Rfb3gap2  | 0.049255719  | 4.33E-10    |
| ENSMUSG000000110926   | Gm5917    | 0.049252065  | 0.038452719 |
| ENSMUSG0000000022550  | Ppard     | 0.04905551   | 0.001191729 |
| ENSMUSG000000026553   | Copa      | 0.049054408  | 0.019989731 |
| ENSMUSG000000033581   | Igf2bp2   | 0.048880245  | 2.07E-07    |
| ENSMUSG000000024914   | Drp1      | 0.048870539  | 0.024215576 |
| ENSMUSG0000000024875  | Yif1a     | 0.048618479  | 1.33E-15    |
| ENSMUSG0000000041747  | Utp15     | 0.048311529  | 0.000180467 |
| ENSMUSG0000000054302  | Eppa      | 0.048035547  | 0.003857249 |
| ENSMUSG000000041605   | Inava     | 0.048011777  | 7.16E-20    |
| ENSMUSG0000000107283  | Mpr17     | 0.047717176  | 0.000238175 |
| ENSMUSG000000006342   | Susd2     | 0.047466959  | 0.000299811 |
| ENSMUSG000000022090   | Pdlim2    | 0.047438796  | 0.02268139  |
| ENSMUSG000000038002   | Cramp1    | 0.047432713  | 2.22E-05    |
| ENSMUSG0000000027667  | Zfp639    | 0.047405285  | 0.018241225 |
| ENSMUSG000000030613   | Cck90b    | 0.047218438  | 1.27E-10    |
| ENSMUSG0000000001270  | Ckb       | 0.047153707  | 2.14E-13    |
| ENSMUSG000000007836   | Hmnpa0    | 0.047147856  | 4.47E-16    |
| ENSMUSG0000000046840  | Hnf4aoc   | 0.046578392  | 0.043965485 |
| ENSMUSG0000000020521  | Rnf1r1    | 0.046163468  | 0.032828358 |
| ENSMUSG000000000743   | Chmp1a    | 0.046140409  | 0.007806352 |
| ENSMUSG000000039062   | Anpnp     | 0.046081742  | 1.18E-07    |
| ENSMUSG0000000090019  | Gimap1    | 0.045791236  | 0.019765081 |
| ENSMUSG000000037851   | Iars      | 0.045535105  | 0.021047305 |
| ENSMUSG000000069045   | Dcd3y     | 0.04545094   | 1.16E-06    |
| ENSMUSG000000053470   | Kdm3a     | 0.045304889  | 0.00288652  |
| ENSMUSG0000000061947  | Serpina10 | 0.045289523  | 2.84E-34    |
| ENSMUSG000000033434   | Gltbp6    | 0.044996536  | 0.037050891 |
| ENSMUSG000000035840   | Lysmd3    | 0.044856204  | 0.00639615  |
| ENSMUSG0000000028410  | Dnaj1     | 0.044565565  | 0.007233847 |
| ENSMUSG000000035239   | Neu3      | 0.044462023  | 1.18E-22    |
| ENSMUSG000000029535   | Triap1    | 0.044283558  | 0.004892759 |
| ENSMUSG000000028648   | Mad1      | 0.043771066  | 0.008038350 |
| ENSMUSG000000033022   | Cdo1      | 0.04331613   | 1.70E-05    |
| ENSMUSG000000040268   | Plekha1   | 0.04313224   | 0.021350326 |
| ENSMUSG000000028836   | Slic30a2  | 0.042664523  | 2.64E-09    |
| ENSMUSG000000091537   | Tma7      | 0.042398     | 1.83E-12    |
| ENSMUSG000000027282   | Mch2      | 0.042337405  | 1.69E-07    |
| ENSMUSG000000008859   | Rala      | 0.042079055  | 0.000202213 |
| ENSMUSG000000000184   | Ccnd2     | 0.041762973  | 1.51E-15    |
| ENSMUSG000000040414   | Slic25a28 | 0.041754988  | 0.008520881 |
| ENSMUSG0000000024780  | Cdc3711   | 0.041579994  | 9.15E-06    |
| ENSMUSG0000000039756  | Dnrip2    | 0.041504465  | 0.019190536 |
| ENSMUSG0000000034101  | Ctndd1    | 0.041451436  | 1.59E-10    |
| ENSMUSG0000000100801  | Gm15459   | 0.040602952  | 0.034609858 |
| ENSMUSG000000046836   | Brox      | 0.040574858  | 0.001925028 |

|                       |            |             |             |
|-----------------------|------------|-------------|-------------|
| ENSMUSG000000031103   | ElH4       | 0.040525784 | 2.88E-06    |
| ENSMUSG000000020841   | Cpd        | 0.040307415 | 3.20E-12    |
| ENSMUSG000000041681   | lapp       | 0.040259269 | 0.00011281  |
| ENSMUSG000000016409   | Nkup       | 0.039677802 | 0.048388236 |
| ENSMUSG000000032112   | Trappc4    | 0.039446251 | 7.91E-09    |
| ENSMUSG000000017386   | Traf4      | 0.038943997 | 0.004569192 |
| ENSMUSG0000000024790  | Sac3d1     | 0.038545226 | 4.27E-07    |
| ENSMUSG000000001323   | Srr        | 0.03841591  | 0.002938991 |
| ENSMUSG0000000038412  | Higd1a     | 0.037910425 | 1.83E-20    |
| ENSMUSG000000055917   | Ztp277     | 0.037674163 | 0.000594613 |
| ENSMUSG0000000038400  | Pmpa1      | 0.037471018 | 0.001759583 |
| ENSMUSG0000000011114  | Tlbrg1     | 0.03710941  | 1.79E-10    |
| ENSMUSG0000000020075  | Ddx21      | 0.036949696 | 1.54E-06    |
| ENSMUSG0000000076609  | Ilgic      | 0.036670603 | 1.95E-09    |
| ENSMUSG0000000029578  | Wipi2      | 0.036539356 | 0.001377849 |
| ENSMUSG0000000031431  | Tsc22d3    | 0.036449955 | 1.03E-07    |
| ENSMUSG000000068036   | Afrdn      | 0.036399631 | 2.43E-11    |
| ENSMUSG000000070002   | ElI        | 0.036131916 | 2.63E-05    |
| ENSMUSG000000057230   | Aak1       | 0.036046695 | 0.045652398 |
| ENSMUSG0000000030591  | Psmn8      | 0.03586515  | 0.014788109 |
| ENSMUSG0000000056851  | Pcbp2      | 0.035837477 | 0.005793103 |
| ENSMUSG0000000037007  | Ztp113     | 0.035737525 | 0.04575066  |
| ENSMUSG0000000020149  | Rab1a      | 0.03564154  | 2.36E-06    |
| ENSMUSG0000000022350  | Washc5     | 0.035523377 | 8.23E-05    |
| ENSMUSG0000000024908  | Pppr3      | 0.03550247  | 0.042758846 |
| ENSMUSG0000000037408  | Cnm4       | 0.035414499 | 9.76E-12    |
| ENSMUSG0000000061411  | Nol4i      | 0.035375241 | 0.000434132 |
| ENSMUSG0000000033845  | Mrip15     | 0.035040836 | 0.000550197 |
| ENSMUSG0000000028463  | Car9       | 0.034873121 | 0.005196348 |
| ENSMUSG000000078622   | Ccdc47     | 0.034869093 | 0.007901452 |
| ENSMUSG0000000026260  | Ndufa10    | 0.034559884 | 5.01E-16    |
| ENSMUSG000000052310   | Slic3ra1   | 0.034437246 | 0.014625219 |
| ENSMUSG0000000061950  | Ppp4r1     | 0.034063687 | 0.001581674 |
| ENSMUSG000000000142   | Axin2      | 0.03392597  | 4.37E-25    |
| ENSMUSG0000000028273  | Pdlim5     | 0.033605343 | 0.006962127 |
| ENSMUSG0000000027490  | E2f1       | 0.033541496 | 0.045454589 |
| ENSMUSG0000000022175  | Lrp10      | 0.033255776 | 5.02E-05    |
| ENSMUSG0000000036109  | Mbn13      | 0.032725714 | 0.021126102 |
| ENSMUSG0000000044030  | Ir2tp1     | 0.032591377 | 8.83E-05    |
| ENSMUSG0000000002396  | Oca1       | 0.032563835 | 0.001401274 |
| ENSMUSG0000000049295  | Ztp219     | 0.032475405 | 0.00120847  |
| ENSMUSG0000000029405  | G3tpc2     | 0.031757393 | 0.00085329  |
| ENSMUSG0000000025557  | Slic15a1   | 0.031595513 | 0.000789598 |
| ENSMUSG0000000036026  | Tmem83b    | 0.03144866  | 1.03E-05    |
| ENSMUSG0000000052135  | Foxo6      | 0.031209071 | 3.25E-13    |
| ENSMUSG0000000002983  | Relb       | 0.030652784 | 5.64E-22    |
| ENSMUSG0000000020231  | Dip2a      | 0.030626502 | 0.002463622 |
| ENSMUSG000000019809   | Pec3       | 0.030307395 | 1.22E-10    |
| ENSMUSG0000000026687  | Aldha9a1   | 0.030304837 | 2.48E-06    |
| ENSMUSG0000000079659  | Tmem243    | 0.030304109 | 0.000344906 |
| ENSMUSG0000000024130  | Abca3      | 0.030013986 | 2.72E-06    |
| ENSMUSG0000000032458  | Copb2      | 0.029723293 | 0.001129268 |
| ENSMUSG0000000042428  | Mgat3      | 0.029613235 | 0.000410973 |
| ENSMUSG000000059263   | Usp47      | 0.029557603 | 0.002233072 |
| ENSMUSG0000000060992  | Copz1      | 0.029489064 | 0.002269788 |
| ENSMUSG0000000096210  | H1f10      | 0.029333779 | 0.000101065 |
| ENSMUSG0000000038780  | Smurf1     | 0.028819814 | 0.022628139 |
| ENSMUSG000000071711   | Mpet       | 0.028751731 | 3.75E-14    |
| ENSMUSG0000000049553  | Polr1a     | 0.028450473 | 1.67E-05    |
| ENSMUSG0000000092274  | Neat1      | 0.028301375 | 0.000681713 |
| ENSMUSG0000000033068  | Entpd6     | 0.027877091 | 0.009325215 |
| ENSMUSG0000000030447  | Cytip1     | 0.02784952  | 0.019104762 |
| ENSMUSG0000000014074  | Rnf168     | 0.027800534 | 0.00107887  |
| ENSMUSG0000000025246  | Tbl1x      | 0.027532267 | 5.13E-07    |
| ENSMUSG0000000004789  | Dlet       | 0.027151619 | 5.48E-13    |
| ENSMUSG0000000026219  | Trtp12     | 0.026962923 | 0.004081927 |
| ENSMUSG0000000006345  | Ggt1       | 0.02629631  | 3.31E-10    |
| ENSMUSG0000000053113  | Socs3      | 0.026281942 | 0.000194357 |
| ENSMUSG0000000024998  | Plec1      | 0.026236012 | 9.87E-14    |
| ENSMUSG000000001630   | Stk38      | 0.026094121 | 0.000874659 |
| ENSMUSG0000000055629  | B4galnt4   | 0.025861461 | 0.001823988 |
| ENSMUSG0000000026670  | Uap1       | 0.02541971  | 2.54E-07    |
| ENSMUSG0000000003528  | Slic25a1   | 0.025394537 | 1.43E-05    |
| ENSMUSG0000000078202  | Nrarp      | 0.025072394 | 3.97E-06    |
| ENSMUSG0000000022052  | Ppp2r2a    | 0.025029625 | 2.31E-05    |
| ENSMUSG0000000026576  | Atp1b1     | 0.025024559 | 2.50E-07    |
| ENSMUSG0000000026519  | Tmem63a    | 0.024952489 | 3.38E-05    |
| ENSMUSG0000000052406  | Rexx4      | 0.024931912 | 0.037490416 |
| ENSMUSG0000000045594  | Glb1       | 0.024853035 | 4.87E-08    |
| ENSMUSG0000000028672  | Hmgd       | 0.024823654 | 5.38E-09    |
| ENSMUSG0000000029106  | Add1       | 0.02443176  | 2.03E-09    |
| ENSMUSG0000000031482  | Slic25a15  | 0.023658268 | 2.71E-06    |
| ENSMUSG0000000062234  | Gak        | 0.023631415 | 0.000474525 |
| ENSMUSG0000000059005  | Hmnpa3     | 0.023520349 | 1.36E-05    |
| ENSMUSG0000000027720  | It2        | 0.022910131 | 1.23E-07    |
| ENSMUSG0000000020883  | Fbxl20     | 0.022898096 | 0.011413888 |
| ENSMUSG0000000063172  | It25       | 0.022718239 | 0.04423346  |
| ENSMUSG0000000032232  | Cgnt1      | 0.022522127 | 0.00447197  |
| ENSMUSG0000000017802  | Retreg3    | 0.021965462 | 3.66E-05    |
| ENSMUSG0000000031245  | Hmg5       | 0.021385131 | 8.17E-10    |
| ENSMUSG0000000085427  | 6430710C18 | 0.021287232 | 7.06E-07    |
| ENSMUSG0000000028792  | Ak2        | 0.021073543 | 6.33E-34    |
| ENSMUSG0000000024074  | Crim1      | 0.020862242 | 2.93E-05    |
| ENSMUSG0000000049922  | Slic35c1   | 0.020467378 | 0.000794929 |
| ENSMUSG0000000026150  | Mff        | 0.020420595 | 0.002231949 |
| ENSMUSG0000000090000  | Ier3ip1    | 0.020352232 | 0.000326758 |
| ENSMUSG0000000027099  | Mtx2       | 0.020293645 | 1.46E-08    |
| ENSMUSG0000000026279  | Thap4      | 0.020266006 | 1.71E-12    |
| ENSMUSG00000000107176 | Gm9794     | 0.020217055 | 0.000658285 |
| ENSMUSG0000000028249  | Sdcbp      | 0.020151919 | 0.042130774 |
| ENSMUSG0000000032637  | Atxn2l     | 0.020045166 | 0.017576169 |
| ENSMUSG0000000055415  | Atp10b     | 0.019992166 | 0.000170506 |
| ENSMUSG0000000051147  | Nat2       | 0.019853887 | 2.05E-05    |
| ENSMUSG0000000008730  | Hipk1      | 0.019777195 | 1.03E-08    |
| ENSMUSG0000000021520  | Uqorb      | 0.019513753 | 0.000127633 |
| ENSMUSG0000000035441  | Myo1d      | 0.019509807 | 1.83E-20    |
| ENSMUSG0000000003345  | Cank1g2    | 0.019390735 | 0.016400404 |
| ENSMUSG0000000006678  | Pola1      | 0.019376756 | 0.005994317 |
| ENSMUSG0000000047126  | Ctic       | 0.019258538 | 0.008226494 |
| ENSMUSG0000000029071  | Dvl1       | 0.01836086  | 0.000510606 |
| ENSMUSG0000000028381  | Ugog       | 0.018328757 | 0.001765034 |
| ENSMUSG0000000060147  | Serpinb6a  | 0.018001895 | 0.002761641 |
| ENSMUSG0000000059325  | Ztp870     | 0.017949411 | 4.50E-07    |
| ENSMUSG0000000026175  | Wif1       | 0.017920381 | 0.003888009 |
| ENSMUSG0000000035762  | Tmem161b   | 0.017879633 | 4.16E-07    |
| ENSMUSG0000000031485  | Pilpb      | 0.01754725  | 0.048561538 |
| ENSMUSG0000000034343  | Ube2f      | 0.01736434  | 3.24E-06    |
| ENSMUSG0000000042041  | 201003K11  | 0.017276112 | 1.04E-16    |
| ENSMUSG0000000053477  | Tcf4       | 0.017110414 | 0.025518977 |
| ENSMUSG0000000042644  | Hpr3       | 0.016756841 | 0.000111671 |
| ENSMUSG0000000032314  | EtfA       | 0.016581832 | 1.16E-10    |
| ENSMUSG0000000020003  | Pex7       | 0.016540839 | 0.004490301 |

|                       |            |             |             |
|-----------------------|------------|-------------|-------------|
| ENSMUSG000000041439   | Mfad6      | 0.032727521 | 3.55E-09    |
| ENSMUSG0000000022219  | Cidab      | 0.03269756  | 0.004938028 |
| ENSMUSG0000000066800  | Rnasel     | 0.032656867 | 4.14E-06    |
| ENSMUSG0000000057982  | Ztp809     | 0.032418115 | 0.039896575 |
| ENSMUSG0000000039438  | Ttc36      | 0.032406556 | 0.006308072 |
| ENSMUSG000000071662   | Polr2g     | 0.032150159 | 0.000821776 |
| ENSMUSG0000000039756  | Dnhtp2     | 0.031998587 | 0.019190536 |
| ENSMUSG000000041762   | Gpr155     | 0.031830302 | 1.17E-13    |
| ENSMUSG0000000015092  | Edf1       | 0.031575319 | 1.96E-09    |
| ENSMUSG0000000027784  | Ppm1l      | 0.031567568 | 0.01823412  |
| ENSMUSG0000000014077  | Chp1       | 0.031564104 | 0.002308111 |
| ENSMUSG0000000070733  | Fryl       | 0.031562078 | 0.000155063 |
| ENSMUSG0000000050390  | C77080     | 0.031529028 | 7.88E-08    |
| ENSMUSG000000049106   | Dcaf5      | 0.03137989  | 0.019448091 |
| ENSMUSG0000000002345  | Borcs8     | 0.031073591 | 0.002362873 |
| ENSMUSG0000000027589  | Pcmtd2     | 0.031057317 | 0.000302619 |
| ENSMUSG0000000032454  | Rbp2       | 0.031044095 | 1.49E-78    |
| ENSMUSG0000000020190  | Mknk2      | 0.031022621 | 0.00037279  |
| ENSMUSG0000000021392  | Nol8       | 0.031011425 | 0.044533113 |
| ENSMUSG0000000024006  | Stk38      | 0.03087572  | 8.60E-05    |
| ENSMUSG0000000041688  | Amot       | 0.03071643  | 0.00071503  |
| ENSMUSG0000000021731  | Mpx30      | 0.030709933 | 6.24E-07    |
| ENSMUSG0000000070047  | Fat1       | 0.030406806 | 1.36E-09    |
| ENSMUSG0000000030035  | Wbp1       | 0.030300977 | 0.039111291 |
| ENSMUSG0000000066621  | Tecpr1     | 0.030208354 | 0.000741664 |
| ENSMUSG0000000040850  | Parme4     | 0.03020588  | 0.002279962 |
| ENSMUSG00000000207306 | Nusap1     | 0.029969632 | 6.43E-07    |
| ENSMUSG0000000028955  | Vamp3      | 0.029886937 | 0.000446012 |
| ENSMUSG0000000040498  | Igpf23     | 0.029755643 | 1.20E-11    |
| ENSMUSG0000000026500  | Cox20      | 0.029563841 | 0.035315011 |
| ENSMUSG0000000038264  | Serna7a    | 0.029173194 | 0.004409113 |
| ENSMUSG0000000071178  | Serpinat1b | 0.029073972 | 0.002466377 |
| ENSMUSG0000000027304  | Rft1       | 0.028990776 | 7.9E-06     |
| ENSMUSG0000000030203  | Dusp16     | 0.028901996 | 0.000159141 |
| ENSMUSG0000000028173  | Wls        | 0.028851905 | 4.18E-05    |
| ENSMUSG0000000073725  | Lmbtd1     | 0.028762069 | 0.016279203 |
| ENSMUSG0000000052421  | Hdhc2      | 0.028690729 | 9.66E-06    |
| ENSMUSG0000000048490  | Nrip1      | 0.02848001  | 0.003274848 |
| ENSMUSG0000000031885  | Ctfb       | 0.028326256 | 0.00038681  |
| ENSMUSG0000000048000  | Gigyl2     | 0.02801419  | 0.00021241  |
| ENSMUSG0000000026775  | Yme11f     | 0.028005881 | 7.9E-08     |
| ENSMUSG0000000050002  | Idnk       | 0.027964373 | 4.94E-09    |
| ENSMUSG0000000032202  | Rab27a     | 0.027908967 | 0.029014665 |
| ENSMUSG0000000000399  | Ndufa8     | 0.027859453 | 5.75E-06    |
| ENSMUSG0000000036632  | Alg5       | 0.027793009 | 0.001926304 |
| ENSMUSG0000000032468  | Armcd      | 0.027304445 | 0.003552609 |
| ENSMUSG0000000026049  | Npm3       | 0.026862606 | 0.00510097  |
| ENSMUSG000000016520   | Lnx2       | 0.02670811  | 0.023590132 |
| ENSMUSG0000000029465  | Arpc3      | 0.026596086 | 4.90E-05    |
| ENSMUSG0000000067369  | Cyp2d2     | 0.026377244 | 8.05E-05    |
| ENSMUSG0000000035437  | Rabtg1b    | 0.026237114 | 0.000412556 |
| ENSMUSG0000000025812  | Pard3      | 0.025965555 | 7.14E-05    |
| ENSMUSG000000074892   | B3gat5     | 0.025693496 | 0.000151277 |
| ENSMUSG0000000001786  | Fbov7      | 0.025600256 | 0.002726864 |
| ENSMUSG0000000056124  | B4gat6     | 0.025558607 | 1.51E-10    |
| ENSMUSG0000000022890  | Atp5j      | 0.025400386 | 8.38E-05    |
| ENSMUSG0000000090907  | Vps4b      | 0.025390735 | 0.00241387  |
| ENSMUSG0000000017707  | Serinc3    | 0.025340804 | 9.83E-06    |
| ENSMUSG0000000047733  | Ztp590     | 0.024728687 | 0.018289775 |
| ENSMUSG0000000044433  | Gamsap3    | 0.024589424 | 4.08E-11    |
| ENSMUSG000000014856   | Tmem208    | 0.024061372 | 3.45E-07    |
| ENSMUSG0000000033382  | Etv3       | 0.023918403 | 0.004127172 |
| ENSMUSG0000000020390  | Ube2b      | 0.02386678  | 1.69E-08    |
| ENSMUSG0000000034528  | Hsd17b13   | 0.02371851  | 5.76E-28    |
| ENSMUSG0000000025917  | Cope5      | 0.023390358 | 0.000612087 |
| ENSMUSG0000000026049  | Tex30      | 0.023242406 | 0.029257646 |
| ENSMUSG0000000035242  | Oac3       | 0.023115528 | 1.98E-11    |
| ENSMUSG000000003534   | Ddr1       | 0.022723465 | 1.15E-07    |
| ENSMUSG0000000053477  | Tcd4       | 0.02276786  | 0.02518977  |
| ENSMUSG000000015597   | Ztp318     | 0.022651543 | 0.000117098 |
| ENSMUSG000000106918   | Mmp33      | 0.022549884 | 0.000710926 |
| ENSMUSG000000029231   | Pdgrfa     | 0.022069426 | 5.24E-05    |
| ENSMUSG000000020571   | Pdia6      | 0.022022355 | 9.56E-12    |
| ENSMUSG0000000307070  | Rbmxl1     | 0.021805921 | 0.01726217  |
| ENSMUSG0000000101795  | Gm5835     | 0.021736582 | 3.94E-11    |
| ENSMUSG000000036833   | Prph4      | 0.021732103 | 0.000183961 |
| ENSMUSG0000000025829  | Prox1      | 0.021378062 | 0.001842335 |
| ENSMUSG0000000040471  | Gdn        | 0.021026345 | 1.69E-05    |
| ENSMUSG0000000035621  | Mig6       | 0.020502525 | 1.06E-11    |
| ENSMUSG0000000021610  | Cplm31     | 0.020472357 | 0.004627881 |
| ENSMUSG0000000026087  | Mmp30      | 0.020430555 | 0.000987109 |
| ENSMUSG0000000042305  | Tmem183a   | 0.019936214 | 0.023625812 |
| ENSMUSG0000000071706  | Junnd      | 0.019935314 | 4.33E-07    |
| ENSMUSG0000000040466  | Bvr        | 0.019661478 | 9.45E-06    |
| ENSMUSG0000000033735  | Sprr       | 0.019561184 | 1.17E-05    |
| ENSMUSG0000000079426  | Apoc4      | 0.019295117 | 0.000422296 |
| ENSMUSG0000000001151  | Pnk1       | 0.019160315 | 7.28E-10    |
| ENSMUSG0000000062169  | Cnhd3      | 0.019054632 | 8.41E-09    |
| ENSMUSG0000000022130  | Tgfb3      | 0.019050365 | 2.74E-05    |
| ENSMUSG0000000063275  | Hsp90      | 0.018915415 | 0.00040136  |
| ENSMUSG0000000031366  | Dagcr2     | 0.01853671  | 0.01620002  |
| ENSMUSG0000000068040  | Tgm6f4     | 0.018473885 | 0.000601396 |
| ENSMUSG0000000120995  | Gm1425     | 0.018376493 | 0.000103279 |
| ENSMUSG0000000024393  | Pnc2a      | 0.018178747 | 3.79E-05    |
| ENSMUSG0000000001289  | Pld1b      | 0.018051327 | 0.000145789 |
| ENSMUSG0000000081684  | Rpm2-ps13  | 0.017740609 | 0.045862863 |
| ENSMUSG0000000012422  | Tmem1      | 0.017325531 | 1.09E-16    |
| ENSMUSG0000000035953  | Pip4p1     | 0.017211534 | 0.020864487 |
| ENSMUSG0000000046840  | Hif14aas   | 0.017079259 | 0.043365485 |
| ENSMUSG0000000031090  | Nadyl1     | 0.017022418 | 9.62E-07    |
| ENSMUSG0000000003485  | Scap       | 0.016572656 | 3.90E-05    |
| ENSMUSG0000000030059  | Tmf1       | 0.016517665 | 0.047482808 |
| ENSMUSG0000000033375  | Eif2ak3    | 0.016235474 | 0.002038076 |
| ENSMUSG0000000024795  | Kif20b     | 0.016085143 | 1.79E-06    |
| ENSMUSG0000000001403  | Ube2c      | 0.016061287 | 8.73E-07    |
| ENSMUSG0000000058668  | Ampd3      | 0.015995515 | 0.000203058 |
| ENSMUSG0000000028223  | Decor1     | 0.015923036 | 7.57E-15    |
| ENSMUSG0000000017176  | Gm9794     | 0.015844564 | 0.000685828 |
| ENSMUSG0000000038722  | Bud31      | 0.015503717 | 6.22E-05    |
| ENSMUSG0000000062624  | Cyp2c67    | 0.015460093 | 0.000754786 |
| ENSMUSG0000000024426  | Atat1      | 0.015407886 | 8.66E-05    |
| ENSMUSG0000000078566  | Bnip3      | 0.015088365 | 0.000409626 |
| ENSMUSG0000000024426  | Slc11a     | 0.014922299 | 5.96E-04    |
| ENSMUSG0000000021607  | Mrp36      | 0.014842774 | 5.97E-05    |
| ENSMUSG0000000022185  | Acin1      | 0.014770246 | 2.07E-11    |
| ENSMUSG0000000025645  | Cdc5f1     | 0.014680293 | 0.000567803 |
| ENSMUSG0000000038822  | Hacn1      | 0.014648948 | 0.002671933 |
| ENSMUSG0000000028180  | Znrb2      | 0.014325517 | 0.001266444 |
| ENSMUSG0000000021366  | Hivp1      | 0.014063193 | 6.04E-05    |
| ENSMUSG0000000041733  | Canx       | 0.013962532 | 0.007829798 |
| ENSMUSG0000000003388  | Comc       | 0.013894086 | 2.16E-53    |

|                       |             |             |              |
|-----------------------|-------------|-------------|--------------|
| ENSMUSG00000000326    | Comt        | 0.016508004 | 0.013773667  |
| ENSMUSG000000032712   | Resf1       | 0.016405359 | 8.14E-18     |
| ENSMUSG000000026209   | Dnpep       | 0.016363089 | 0.001037584  |
| ENSMUSG000000049232   | Tigd2       | 0.016110489 | 0.037733281  |
| ENSMUSG0000000029275  | Gfi1        | 0.015936011 | 0.031129781  |
| ENSMUSG000000063358   | Mapk1       | 0.015712695 | 5.15E-06     |
| ENSMUSG0000000025950  | Idh1        | 0.015348389 | 1.14E-27     |
| ENSMUSG0000000024812  | Tjp2        | 0.015341198 | 0.000337374  |
| ENSMUSG0000000058240  | Cryz11      | 0.015233236 | 3.34E-06     |
| ENSMUSG0000000031333  | Abcb7       | 0.015162852 | 0.001190587  |
| ENSMUSG0000000035623  | Ref1        | 0.014354454 | 0.0083493    |
| ENSMUSG0000000022283  | Patpcc1     | 0.014068893 | 3.11E-16     |
| ENSMUSG0000000023961  | Enpp4       | 0.01357977  | 0.0456917    |
| ENSMUSG0000000028207  | Asph        | 0.013316661 | 0.000594212  |
| ENSMUSG0000000040322  | Slc25a24    | 0.013250399 | 4.81E-26     |
| ENSMUSG000000002846   | Timmdc1     | 0.013126384 | 0.013911135  |
| ENSMUSG0000000071178  | Serpina1b   | 0.012957721 | 0.002466377  |
| ENSMUSG0000000078572  | Ndufaf8     | 0.012875644 | 5.71E-06     |
| ENSMUSG0000000066150  | Slc31a1     | 0.012867404 | 4.12E-05     |
| ENSMUSG0000000026821  | Ralgds      | 0.012823118 | 2.14E-06     |
| ENSMUSG0000000070733  | Fryl        | 0.01265891  | 0.000155063  |
| ENSMUSG0000000026201  | Stk16       | 0.012602861 | 0.000649602  |
| ENSMUSG0000000028692  | Akr1a1      | 0.012063357 | 0.000567593  |
| ENSMUSG0000000030304  | Ergic2      | 0.011827043 | 5.31E-08     |
| ENSMUSG0000000028521  | Slc35d1     | 0.011660754 | 0.001158736  |
| ENSMUSG000000008999   | Bmp7        | 0.011623542 | 2.13E-05     |
| ENSMUSG0000000029028  | Lrrcc47     | 0.011476797 | 0.011874495  |
| ENSMUSG0000000024487  | Yipf5       | 0.011156044 | 1.70E-14     |
| ENSMUSG0000000034022  | Cpsf1       | 0.010802892 | 1.10E-05     |
| ENSMUSG0000000046761  | Fam83h      | 0.010606012 | 1.54E-08     |
| ENSMUSG0000000061887  | Sabp3       | 0.01060521  | 1.23E-10     |
| ENSMUSG0000000029618  | Ocm         | 0.010589673 | 1.48E-68     |
| ENSMUSG0000000044224  | Dnajc21     | 0.010467238 | 0.0005817429 |
| ENSMUSG0000000049799  | Lrrc19      | 0.010315791 | 7.24E-08     |
| ENSMUSG0000000025162  | Csnk1d      | 0.010007991 | 8.31E-05     |
| ENSMUSG0000000020840  | Bimh        | 0.009953494 | 1.17E-06     |
| ENSMUSG0000000029445  | Hpd         | 0.009586    | 0.004556115  |
| ENSMUSG0000000056537  | Rlim        | 0.009428258 | 0.01990862   |
| ENSMUSG0000000051391  | Ywhag       | 0.009268742 | 0.014621979  |
| ENSMUSG000000001891   | Ugp2        | 0.009164283 | 0.001240041  |
| ENSMUSG0000000032526  | Ss18l2      | 0.008970852 | 1.73E-08     |
| ENSMUSG0000000078429  | Ctdsp2      | 0.008681272 | 7.43E-22     |
| ENSMUSG0000000045934  | Mtmm11      | 0.008585636 | 5.34E-11     |
| ENSMUSG0000000030327  | Necap1      | 0.008224935 | 4.90E-06     |
| ENSMUSG0000000030604  | Zfp626      | 0.008031124 | 0.015514179  |
| ENSMUSG000000006651   | Aplp1       | 0.007832415 | 0.010654896  |
| ENSMUSG0000000023175  | Bsg         | 0.007696451 | 1.98E-08     |
| ENSMUSG0000000039286  | Fndc3b      | 0.007579758 | 0.000805829  |
| ENSMUSG0000000013663  | Pten        | 0.007357268 | 0.03978833   |
| ENSMUSG0000000000399  | Ndufaf9     | 0.006694838 | 5.75E-06     |
| ENSMUSG0000000050148  | Ubqln2      | 0.006685311 | 0.015597078  |
| ENSMUSG0000000034973  | Dop1a       | 0.006121512 | 0.011657083  |
| ENSMUSG0000000099632  | 2900093K20  | 0.006042813 | 0.034904457  |
| ENSMUSG0000000034243  | Golg1b1     | 0.006018262 | 9.99E-13     |
| ENSMUSG0000000020282  | Rhbd1f1     | 0.00600712  | 0.00065325   |
| ENSMUSG0000000026849  | Tor1a       | 0.005384788 | 1.09E-11     |
| ENSMUSG00000000404530 | Coro1c      | 0.005144555 | 7.64E-21     |
| ENSMUSG0000000041974  | Spidr       | 0.005020692 | 0.028064487  |
| ENSMUSG0000000030059  | Tmf1        | 0.004708625 | 0.0474828    |
| ENSMUSG0000000058715  | Fcst1g      | 0.004178112 | 0.000194731  |
| ENSMUSG0000000031781  | Ciapiin1    | 0.004006047 | 5.09E-05     |
| ENSMUSG0000000032757  | Bet1        | 0.003932332 | 3.57E-14     |
| ENSMUSG0000000046949  | Nqo2        | 0.003929464 | 0.01634875   |
| ENSMUSG000000014606   | Slc25a11    | 0.003825408 | 8.72E-27     |
| ENSMUSG000000006095   | Tbcb        | 0.003639915 | 0.040265882  |
| ENSMUSG0000000052557  | Gan         | 0.003206216 | 9.07E-10     |
| ENSMUSG0000000047990  | C2cd4a      | 0.002993242 | 3.46E-06     |
| ENSMUSG0000000040048  | Ndufb10     | 0.002807944 | 7.74E-14     |
| ENSMUSG0000000024006  | Stk38       | 0.002777728 | 8.60E-05     |
| ENSMUSG0000000022365  | Der1        | 0.00261946  | 2.05E-10     |
| ENSMUSG0000000036461  | Erf1        | 0.002572624 | 0.011223877  |
| ENSMUSG0000000038807  | Rap1gap2    | 0.002416474 | 9.92E-19     |
| ENSMUSG0000000022390  | Zc3h7b      | 0.00213772  | 0.00683327   |
| ENSMUSG0000000095567  | Noc21       | 0.002108249 | 2.80E-07     |
| ENSMUSG0000000032583  | Mon1a       | 0.00173424  | 0.021467857  |
| ENSMUSG000000019850   | Tnfrap3     | 0.001487851 | 0.038132687  |
| ENSMUSG0000000040640  | Erc2        | 0.001343401 | 3.13E-11     |
| ENSMUSG0000000040423  | Rc3h1       | 0.00132829  | 0.047125216  |
| ENSMUSG0000000024892  | Pcx         | 0.001183199 | 0.004761597  |
| ENSMUSG0000000038206  | Fbxo8       | 0.001177095 | 0.01149584   |
| ENSMUSG0000000025410  | Dctn2       | 0.001088531 | 0.022569002  |
| ENSMUSG0000000074884  | Serf2       | 0.001084346 | 4.23E-14     |
| ENSMUSG0000000039753  | Fbxl5       | 0.001034523 | 4.14E-08     |
| ENSMUSG0000000021286  | Zhyve21     | 0.000937308 | 0.016307069  |
| ENSMUSG0000000101523  | Csnk2a1-ps3 | 0.000867892 | 0.000485922  |
| ENSMUSG0000000061288  | Taox3       | 0.000778315 | 3.96E-12     |
| ENSMUSG0000000052337  | Immt        | 0.000646676 | 9.78E-25     |
| ENSMUSG0000000060803  | Getp1       | 0.000638233 | 4.63E-08     |
| ENSMUSG0000000081534  | Slc48a1     | 0.000631682 | 0.001700455  |
| ENSMUSG0000000054414  | Slc30a7     | 0.000169346 | 0.025601017  |

|                      |          |             |             |
|----------------------|----------|-------------|-------------|
| ENSMUSG000000040345  | Arhgap9  | 0.013801282 | 0.007556482 |
| ENSMUSG000000025894  | Aasdhppt | 0.013561142 | 0.003327901 |
| ENSMUSG000000014905  | Dnajb9   | 0.013557542 | 7.16E-09    |
| ENSMUSG000000019359  | Gdpd2    | 0.013473846 | 4.61E-32    |
| ENSMUSG000000040102  | Kih42    | 0.012905173 | 0.046022438 |
| ENSMUSG000000058756  | Thra     | 0.012852177 | 0.025815408 |
| ENSMUSG000000039531  | Zup1     | 0.012591581 | 0.009380488 |
| ENSMUSG000000042675  | Ypel3    | 0.012499133 | 0.033612746 |
| ENSMUSG000000093483  | AA465934 | 0.012240996 | 0.002381984 |
| ENSMUSG000000038495  | Onud7b   | 0.012207341 | 0.035739845 |
| ENSMUSG000000014606  | Slc25a11 | 0.01211429  | 8.72E-27    |
| ENSMUSG000000037710  | Cisd1    | 0.012071981 | 4.48E-13    |
| ENSMUSG000000028165  | Cisd2    | 0.012055012 | 0.000157942 |
| ENSMUSG000000030538  | Cib1     | 0.011873168 | 0.026818078 |
| ENSMUSG000000028572  | Hook1    | 0.011836993 | 0.005157732 |
| ENSMUSG000000042670  | Immp11   | 0.011828031 | 0.008919567 |
| ENSMUSG000000049760  | Micos13  | 0.011501508 | 1.07E-09    |
| ENSMUSG000000023944  | Hsp90ab1 | 0.01131466  | 0.000277912 |
| ENSMUSG000000028990  | Lzic     | 0.011240112 | 2.00E-10    |
| ENSMUSG000000036805  | Noxa1    | 0.011182066 | 4.43E-07    |
| ENSMUSG000000020721  | Helz     | 0.011047208 | 0.00066806  |
| ENSMUSG000000062075  | Lmbb2    | 0.010710426 | 0.030677289 |
| ENSMUSG000000025958  | Creb1    | 0.010512904 | 1.03E-06    |
| ENSMUSG000000002010  | Idh3g    | 0.010457048 | 4.89E-10    |
| ENSMUSG0000000022964 | Tmem50b  | 0.010166998 | 0.000104392 |
| ENSMUSG000000021242  | Npc2     | 0.010098174 | 0.022767552 |
| ENSMUSG0000000025192 | Entpd7   | 0.009857061 | 3.76E-06    |
| ENSMUSG000000041084  | Ostc     | 0.009766901 | 0.000103815 |
| ENSMUSG000000045328  | Cempe    | 0.009321178 | 1.04E-10    |
| ENSMUSG000000020530  | Ggnbtp2  | 0.009250667 | 0.020020825 |
| ENSMUSG000000053862  | Slc51b   | 0.009191001 | 1.15E-12    |
| ENSMUSG000000051978  | Erich1   | 0.009159775 | 0.012849896 |
| ENSMUSG000000026193  | Myo7b    | 0.009125449 | 0.006930624 |
| ENSMUSG000000005161  | Prdx2    | 0.009093448 | 5.37E-07    |
| ENSMUSG0000000026193 | Fn1      | 0.008760084 | 2.57E-05    |
| ENSMUSG000000022507  | Hapstr1  | 0.00863776  | 0.044348297 |
| ENSMUSG0000000028167 | Bdh2     | 0.008573589 | 3.67E-16    |
| ENSMUSG000000042797  | Aqp11    | 0.008365504 | 4.27E-15    |
| ENSMUSG0000000031782 | Coq9     | 0.008283338 | 3.31E-11    |
| ENSMUSG000000039983  | Ccdc32   | 0.008239062 | 0.000867627 |
| ENSMUSG000000025417  | Pip4k2c  | 0.008159537 | 2.33E-05    |
| ENSMUSG000000024812  | Tjp2     | 0.007992594 | 0.000337374 |
| ENSMUSG0000000033948 | Zswim5   | 0.00770352  | 0.03047745  |
| ENSMUSG000000028833  | Ncdn     | 0.007612665 | 0.004002798 |
| ENSMUSG000000022884  | Eif4a2   | 0.007420135 | 1.79E-08    |
| ENSMUSG000000046804  | Phgr1    | 0.007167662 | 4.53E-11    |
| ENSMUSG000000029098  | Acx3     | 0.00700648  | 0.005836197 |
| ENSMUSG000000035885  | Cox8a    | 0.006984737 | 4.79E-09    |
| ENSMUSG000000053054  | Adh6a    | 0.006786965 | 4.87E-60    |
| ENSMUSG000000019039  | Dalr3    | 0.00678629  | 0.04222603  |
| ENSMUSG000000021427  | Ser1     | 0.006222064 | 0.032469343 |
| ENSMUSG000000022752  | Tomm70a  | 0.006140397 | 7.18E-29    |
| ENSMUSG0000000057134 | Ado      | 0.006068522 | 2.38E-05    |
| ENSMUSG0000000120473 | Gm3742   | 0.005954229 | 2.76E-05    |
| ENSMUSG0000000019897 | Cdc59    | 0.005820144 | 1.69E-15    |
| ENSMUSG000000024346  | Pfdn1    | 0.005756387 | 0.005937245 |
| ENSMUSG0000000062014 | Gmfb     | 0.005663075 | 0.000147745 |
| ENSMUSG000000032293  | Ireb2    | 0.005516377 | 6.00E-09    |
| ENSMUSG000000028998  | Tomm7    | 0.005431379 | 0.014678503 |
| ENSMUSG000000028273  | Pdlim5   | 0.00542954  | 0.006962127 |
| ENSMUSG000000049354  | Dcaf7    | 0.005173706 | 0.00128914  |
| ENSMUSG000000051391  | Ywhag    | 0.005032356 | 0.014621979 |
| ENSMUSG000000026238  | Ptma     | 0.004926815 | 0.001807062 |
| ENSMUSG000000028085  | Gatb     | 0.004926296 | 0.000519166 |
| 1110004F10           |          | 0.004793054 | 0.006796763 |
| ENSMUSG000000032199  | Polr2m   | 0.004552237 | 0.009282081 |
| ENSMUSG000000040631  | Dok4     | 0.004371374 | 2.17E-13    |
| ENSMUSG000000057858  | Fam204a  | 0.004354383 | 4.73E-06    |
| ENSMUSG000000028792  | Ak2      | 0.004224259 | 6.33E-34    |
| ENSMUSG000000028159  | Dapp1    | 0.004006484 | 0.01161518  |
| ENSMUSG000000025060  | Slk      | 0.003650142 | 9.32E-05    |
| ENSMUSG000000030168  | Adipor2  | 0.003607144 | 1.11E-10    |
| ENSMUSG000000038648  | Creb3l2  | 0.003245516 | 2.44E-05    |
| ENSMUSG000000022892  | App      | 0.003235159 | 5.19E-27    |
| ENSMUSG000000029647  | Pan3     | 0.00322931  | 1.77E-05    |
| ENSMUSG000000078440  | Dohh     | 0.003105765 | 0.001070734 |
| ENSMUSG000000037106  | Fer1l6   | 0.003014205 | 9.54E-10    |
| ENSMUSG000000079494  | Nat8f5   | 0.002770687 | 2.08E-24    |
| ENSMUSG000000021759  | Ptpp1    | 0.002700178 | 2.46E-19    |
| ENSMUSG000000006307  | Kmt2b    | 0.002697503 | 0.001159611 |
| ENSMUSG000000051224  | Tseanc   | 0.002642911 | 0.006328797 |
| ENSMUSG000000041629  | Fam104a  | 0.002616732 | 0.000133295 |
| ENSMUSG000000032652  | Creb12   | 0.002562015 | 0.014285435 |
| ENSMUSG000000025921  | Rdh10    | 0.002423786 | 7.95E-10    |
| ENSMUSG000000024619  | Cdk1     | 0.001987403 | 1.94E-26    |
| ENSMUSG000000021096  | Ppm1a    | 0.001111507 | 0.001433497 |
| ENSMUSG000000030447  | Cyfp1    | 0.001006773 | 0.019104762 |
| ENSMUSG000000056941  | Commtd7  | 0.000976242 | 0.006017453 |
| ENSMUSG000000004266  | Ptpn6    | 0.000853263 | 0.014273307 |
| ENSMUSG000000002015  | Bcap31   | 0.000633892 | 4.11E-06    |
| ENSMUSG000000024858  | Grik2    | 0.000594778 | 0.002383016 |
| ENSMUSG000000026032  | Ndufb3   | 0.000487756 | 3.89E-12    |
| ENSMUSG000000026918  | Brd3     | 0.000463032 | 4.77E-05    |
| ENSMUSG000000020477  | Mrip24   | 0.000294618 | 4.81E-06    |

Table S3. Enriched gene clusters in the ileum of PD-fed mice

## A) The 20 most significant GO terms downregulated in the ileum of PD-fed mice

| Category      | GO Term                                      | Count | PValue   | Genes                                                                                                                                                                                                                                                                                                                                                                                                                                                                                                                                                                                                                                                                                                                                                                                                              |
|---------------|----------------------------------------------|-------|----------|--------------------------------------------------------------------------------------------------------------------------------------------------------------------------------------------------------------------------------------------------------------------------------------------------------------------------------------------------------------------------------------------------------------------------------------------------------------------------------------------------------------------------------------------------------------------------------------------------------------------------------------------------------------------------------------------------------------------------------------------------------------------------------------------------------------------|
| GOTERM_BP_FAT | immune response                              | 99    | 1.70E-29 | IFITM3, GIMAP3, SLA2, IFI44L, C4B, LGALS3, DMBT1, TRBC2, ZC3H12A, CD177, HERC6, ZBP1, CD96, GBP7, PRKCH, SP110, TAP1, IFIT1BL1, UNC13D, IGHG2B, CD8A, IGTP, CD226, TRIM15, SH2D1B1, SKAP1, IDO1, REG3B, CD274, NLRX1, CFI, H2-M3, PLA2G5, REG3G, CORO1A, C2, H2-EA, UBD, ST3GAL1, GPR17, H2-EB1, DEFA5, IRGM2, NKXG1, IIGP1, IL7, KLRD1, H2-AB1, PIGR, CXCL9, CIITA, CD3G, CD3E, CD3D, IL18BP, DEFA41, CASP4, NFKB1Z, IGLC3, CD38, MBL2, APOBEC3, GPX2, MMP7, DEFA36, DEFA34, TLR1, LAT2, ZAP70, LCK, DOCK2, TLR2, SASH3, SLFN2, H2-DMA, WAS, MPTX2, CAPG, NOD1, CXCR6, USP18, CCL5, H2-DMB1, SERPINB9B, GBP2, GBP4, CD74, CD209B, PLA2G2D, GBP2B, NOS2, TRAT1, GZMB, H2-AA, ASS1, IL2RB, CD7, CD247, CCL28                                                                                                        |
| GOTERM_BP_FAT | regulation of immune system process          | 88    | 5.38E-27 | PIGR, GIMAP3, CD3E, SLA2, ETS1, C4B, LGALS3, TRBC2, CASP3, CASP4, ZC3H12A, NFKB1Z, IGLC3, CD38, CD177, MBL2, ZBP1, CD96, APOBEC3, GPX2, GBP7, PRKCH, ITGA4, TAP1, RHOH, IFIT1BL1, UNC13D, TLR1, LAT2, IGHG2B, ZAP70, LCK, CD8A, IGTP, PECAM1, CD226, TRIM15, SH2D1B1, HCST, SKAP1, TLR2, IDO1, SASH3, CD274, NLRX1, H2-DMA, H2-M3, 5730507C01RIK, CFI, WAS, DTX1, MPTX2, NOD1, PLA2G5, REG3G, IL2RG, USP18, CORO1A, C2, CNN2, H2-EA, THPO, H2-DMB1, CCL5, SERPINB9B, GBP2, GBP4, CD74, CAR2, GPR17, GBP2B, CD209B, PLA2G2D, H2-EB1, CDKN2A, TRAT1, TNFRSF9, GPR55, IRGM2, H2-AA, IL7, CEACAM10, KLRD1, CD247, CCL28, KLRH1, LGMN, H2-AB1                                                                                                                                                                           |
| GOTERM_BP_FAT | response to biotic stimulus                  | 80    | 7.55E-25 | IFITM3, CXCL9, IFI44L, DEFA41, LGALS3, DMBT1, RGS1, TRBC2, CASP3, CASP4, ZC3H12A, NFKB1Z, CAPN2, IGLC3, MBL2, HERC6, ZBP1, CD52, CD96, APOBEC3, GPX2, GBP7, MMP7, SP110, ATG10, DEFA36, PLAAT3, SLC30A1, DEFA34, IFIT1BL1, LYPD8L, UNC13D, TLR1, IGHG2B, TTC39AOS1, CD8A, IGTP, CD226, TRIM15, LY6A, TLR2, IDO1, REG3B, CD274, NLRX1, SLFN2, SAA3, H2-M3, NOD1, PLA2G5, REG3G, USP18, C2, CCL5, SERPINB9B, GBP2, GBP4, DUOX2, GSTM3, GBP2B, CD209B, NOS2, 1810065E05RIK, SLC10A2, GZMA, DEFA5, IRGM2, GZMB, NKXG7, AA467197, B3GALT5, LSM5, IIGP1, ASS1, PSMB9, LRG1, GSTA1, SAA1, CCL28, KLRH1                                                                                                                                                                                                                    |
| GOTERM_BP_FAT | response to other organism                   | 78    | 1.30E-24 | IFITM3, CXCL9, IFI44L, DEFA41, LGALS3, DMBT1, RGS1, TRBC2, CASP3, CASP4, ZC3H12A, NFKB1Z, CAPN2, IGLC3, MBL2, HERC6, ZBP1, CD52, CD96, APOBEC3, GPX2, GBP7, MMP7, SP110, DEFA36, PLAAT3, SLC30A1, DEFA34, IFIT1BL1, LYPD8L, UNC13D, TLR1, IGHG2B, TTC39AOS1, CD8A, IGTP, TRIM15, LY6A, TLR2, IDO1, REG3B, CD274, NLRX1, SLFN2, SAA3, H2-M3, NOD1, PLA2G5, REG3G, USP18, C2, CCL5, SERPINB9B, GBP2, GBP4, DUOX2, GSTM3, GBP2B, CD209B, NOS2, 1810065E05RIK, SLC10A2, GZMA, DEFA5, IRGM2, GZMB, NKXG7, AA467197, B3GALT5, LSM5, IIGP1, ASS1, PSMB9, LRG1, GSTA1, SAA1, CCL28, KLRH1                                                                                                                                                                                                                                  |
| GOTERM_BP_FAT | response to external biotic stimulus         | 78    | 1.52E-24 | IFITM3, CXCL9, IFI44L, DEFA41, LGALS3, DMBT1, RGS1, TRBC2, CASP3, CASP4, ZC3H12A, NFKB1Z, CAPN2, IGLC3, MBL2, HERC6, ZBP1, CD52, CD96, APOBEC3, GPX2, GBP7, MMP7, SP110, DEFA36, PLAAT3, SLC30A1, DEFA34, IFIT1BL1, LYPD8L, UNC13D, TLR1, IGHG2B, TTC39AOS1, CD8A, IGTP, TRIM15, LY6A, TLR2, IDO1, REG3B, CD274, NLRX1, SLFN2, SAA3, H2-M3, NOD1, PLA2G5, REG3G, USP18, C2, CCL5, SERPINB9B, GBP2, GBP4, DUOX2, GSTM3, GBP2B, CD209B, NOS2, 1810065E05RIK, SLC10A2, GZMA, DEFA5, IRGM2, GZMB, NKXG7, AA467197, B3GALT5, LSM5, IIGP1, ASS1, PSMB9, LRG1, GSTA1, SAA1, CCL28, KLRH1                                                                                                                                                                                                                                  |
| GOTERM_BP_FAT | defense response                             | 87    | 1.88E-23 | IFITM3, CXCL9, CIITA, GIMAP3, ETS1, IFI44L, DEFA41, C4B, LGALS3, DMBT1, TRBC2, CASP4, ZC3H12A, NFKB1Z, DUOX2, IGLC3, CD177, MBL2, HERC6, ZBP1, CD96, APOBEC3, GPX2, GBP7, MMP7, SP110, DEFA36, TAP1, SLC30A1, DEFA34, IFIT1BL1, UNC13D, TLR1, IGHG2B, ZAP70, TTC39AOS1, LCK, CD8A, IGTP, CD226, TRIM15, SH2D1B1, TLR2, IDO1, REG3B, NLRX1, AKNA, SAA3, H2-M3, CFI, WAS, MPTX2, CAPG, NOD1, CXCR6, PLA2G5, REG3G, USP18, CORO1A, C2, NT5E, UBD, CCL5, SERPINB9B, GBP2, GM5431, GBP4, DUOX2, CD74, GPR17, GBP2B, PLA2G2D, H2-EB1, NOS2, DEFA5, IRGM2, GZMB, NKXG7, IFI47, H2-AA, IIGP1, ASS1, ALOX5AP, SAA1, KLRD1, KLRH1, H2-AB1                                                                                                                                                                                    |
| GOTERM_BP_FAT | response to external stimulus                | 110   | 2.54E-23 | IFITM3, ETS1, IFI44L, LGALS3, DMBT1, RGS1, TRBC2, ZC3H12A, DUOX2, CAPN2, HERC6, ZBP1, CD96, GBP7, PRKCH, SP110, SLC30A1, IFIT1BL1, UNC13D, IGHG2B, HOKB9, TTC39AOS1, BIN2, CD8A, IGTP, TRIM15, LY6A, IDO1, REG3B, CD274, NLRX1, AKNA, CFI, H2-M3, PLA2G5, REG3G, CORO1A, C2, CNN2, SLC38A3, GSTM3, GPR17, OPN3, 1810065E05RIK, SLC10A2, DEFA5, IRGM2, MTHFR, NKXG7, ASNS, AA467197, B3GALT5, LSM5, IIGP1, BGLAP3, LGMN, CXCL9, CD3E, DEFA41, C1QTNF1, CASP3, CASP4, NFKB1Z, IGLC3, UPPI, MBL2, CD52, APOBEC3, GPX2, GPX2, MMP7, DEFA36, RHOH, PLAAT3, DEFA34, LYPD8L, TLR1, TMIGD1, LCK, DOCK2, TLR2, SLFN2, SAA3, NOD1, CXCR6, USP18, NT5E, CCL5, SLITRK6, SERPINB9B, GBP2, GBP4, DUOX2, CD74, CD209B, PLA2G2D, GBP2B, NOS2, GZMA, PDX1, GZMB, BMP8B, SUOX, ASS1, PSMB9, LRG1, GSTA1, ALOX5AP, SAA1, CCL28, KLRH1 |
| GOTERM_BP_FAT | regulation of immune response                | 63    | 5.58E-22 | PIGR, GIMAP3, CD3E, SLA2, C4B, LGALS3, TRBC2, CASP4, ZC3H12A, NFKB1Z, IGLC3, CD38, CD177, MBL2, ZBP1, CD96, GPX2, GBP7, PRKCH, TAP1, UNC13D, TLR1, LAT2, IGHG2B, ZAP70, LCK, CD8A, IGTP, CD226, TRIM15, SH2D1B1, HCST, SKAP1, TLR2, IDO1, SASH3, CD274, NLRX1, H2-DMA, H2-M3, CFI, WAS, MPTX2, NOD1, PLA2G5, REG3G, USP18, C2, H2-EA, H2-DMB1, SERPINB9B, GBP2, CD74, GPR17, GBP2B, PLA2G2D, H2-EB1, TRAT1, IRGM2, H2-AA, KLRD1, CD247, H2-AB1                                                                                                                                                                                                                                                                                                                                                                     |
| GOTERM_BP_FAT | response to bacterium                        | 63    | 8.46E-21 | CXCL9, DEFA41, DMBT1, RGS1, TRBC2, CASP3, CASP4, ZC3H12A, NFKB1Z, CAPN2, IGLC3, MBL2, HERC6, CD52, CD96, GPX2, GBP7, MMP7, SP110, DEFA36, PLAAT3, SLC30A1, DEFA34, IFIT1BL1, UNC13D, TLR1, IGHG2B, ZAP70, LCK, CD8A, IGTP, CD226, TRIM15, LY6A, TLR2, IDO1, REG3B, CD274, SLFN2, SAA3, H2-M3, NOD1, REG3G, USP18, C2, CCL5, SERPINB9B, GBP2, GBP4, GSTM3, GBP2B, CD209B, NOS2, 1810065E05RIK, SLC10A2, GZMA, DEFA5, IRGM2, GZMB, AA467197, B3GALT5, LSM5, IIGP1, ASS1, PSMB9, LRG1, GSTA1, SAA1                                                                                                                                                                                                                                                                                                                    |
| GOTERM_BP_FAT | innate immune response                       | 62    | 1.18E-20 | IFITM3, CIITA, GIMAP3, DEFA41, C4B, LGALS3, TRBC2, CASP4, NFKB1Z, IGLC3, CD177, MBL2, HERC6, ZBP1, CD96, APOBEC3, GBP7, TAP1, IFIT1BL1, UNC13D, TLR1, DEFA34, IFIT1BL1, UNC13D, TLR1, IGHG2B, ZAP70, LCK, IGTP, CD226, TRIM15, SH2D1B1, TLR2, NLRX1, H2-M3, CFI, WAS, MPTX2, CAPG, NOD1, PLA2G5, REG3G, USP18, CORO1A, C2, UBD, CCL5, SERPINB9B, GBP2, GBP4, CD74, GBP2B, H2-EB1, NOS2, DEFA5, IRGM2, GZMB, NKXG7, H2-AA, IIGP1, ASS1, KLRD1, H2-AB1                                                                                                                                                                                                                                                                                                                                                               |
| GOTERM_BP_FAT | positive regulation of immune system process | 66    | 1.55E-20 | GIMAP3, CD3E, SLA2, ETS1, C4B, LGALS3, TRBC2, CASP4, ZC3H12A, NFKB1Z, IGLC3, CD38, CD177, MBL2, ZBP1, GBP7, PRKCH, ITGA4, RHOH, UNC13D, TLR1, LAT2, IGHG2B, ZAP70, LCK, CD8A, IGTP, PECAM1, CD226, TRIM15, SH2D1B1, SKAP1, TLR2, IDO1, SASH3, CD274, NLRX1, H2-DMA, H2-M3, CFI, MPTX2, NOD1, PLA2G5, REG3G, IL2RG, CORO1A, C2, H2-EA, THPO, H2-DMB1, CCL5, GBP2, CD74, CAR2, GBP2B, CD209B, H2-EB1, TRAT1, IRGM2, H2-AA, IL7, KLRD1, CD247, KLRH1, LGMN, H2-AB1                                                                                                                                                                                                                                                                                                                                                    |
| GOTERM_BP_FAT | leukocyte cell-cell adhesion                 | 39    | 1.67E-18 | SASH3, CD274, SELPLG, H2-DMA, GIMAP3, DTX1, PLA2G5, CD3E, IL2RG, CORO1A, ETS1, LGALS3, H2-EA, NT5E, CASP3, CCL5, H2-DMB1, ZC3H12A, NFKB1Z, CD177, CD74, PLA2G2D, CD209B, H2-EB1, ITGA4, CDKN2A, TNFRSF9, RHOH, H2-AA, ASS1, ZAP70, LRG1, IL7, LCK, PECAM1, CCL28, SKAP1, H2-AB1, IDO1                                                                                                                                                                                                                                                                                                                                                                                                                                                                                                                              |
| GOTERM_BP_FAT | positive regulation of immune response       | 52    | 3.41E-18 | GIMAP3, CD3E, SLA2, C4B, LGALS3, TRBC2, CASP4, ZC3H12A, NFKB1Z, IGLC3, CD38, CD177, MBL2, ZBP1, GBP7, PRKCH, TLR1, LAT2, IGHG2B, ZAP70, LCK, CD8A, IGTP, CD226, TRIM15, SH2D1B1, SKAP1, TLR2, IDO1, SASH3, CD274, NLRX1, H2-DMA, H2-M3, CFI, MPTX2, NOD1, PLA2G5, REG3G, C2, H2-EA, H2-DMB1, GBP2, CD74, GBP2B, H2-EB1, TRAT1, IRGM2, H2-AA, KLRD1, CD247, H2-AB1                                                                                                                                                                                                                                                                                                                                                                                                                                                  |
| GOTERM_BP_FAT | immune effector process                      | 55    | 1.42E-16 | IFITM3, CXCL9, GIMAP3, IFI44L, C4B, LGALS3, TRBC2, CASP4, ZC3H12A, NFKB1Z, IGLC3, CD177, MBL2, ZBP1, CD96, APOBEC3, GBP7, TAP1, IFIT1BL1, UNC13D, LAT2, IGHG2B, CD8A, IGTP, CD226, TRIM15, SH2D1B1, DOCK2, TLR2, SASH3, NLRX1, SLFN2, H2-DMA, H2-M3, CFI, WAS, MPTX2, NOD1, PLA2G5, CORO1A, C2, H2-EA, H2-DMB1, CCL5, SERPINB9B, ST3GAL1, GBP4, CD74, GBP2B, IRGM2, GZMB, NKXG7, IL2RB, KLRD1, H2-AB1                                                                                                                                                                                                                                                                                                                                                                                                              |
| GOTERM_BP_FAT | regulation of leukocyte cell-cell adhesion   | 34    | 2.12E-15 | SASH3, CD274, H2-DMA, GIMAP3, DTX1, PLA2G5, CD3E, IL2RG, CORO1A, ETS1, LGALS3, H2-EA, CASP3, CCL5, H2-DMB1, ZC3H12A, NFKB1Z, CD74, PLA2G2D, CD209B, H2-EB1, ITGA4, CDKN2A, TNFRSF9, RHOH, H2-AA, ASS1, ZAP70, IL7, LCK, CCL28, SKAP1, H2-AB1, IDO1                                                                                                                                                                                                                                                                                                                                                                                                                                                                                                                                                                 |
| GOTERM_BP_FAT | leukocyte activation                         | 57    | 2.81E-15 | GIMAP3, CD3G, CD3E, SLA2, CD3D, LGALS3, TRBC2, CASP3, ZC3H12A, NFKB1Z, IGLC3, CD38, CD177, RHOH, UNC13D, TLR1, LAT2, IGHG2B, ZAP70, LCK, CD8A, IGTP, LY6D, CD226, SH2D1B1, DOCK2, TLR2, IDO1, SASH3, CD274, SELPLG, SLFN2, H2-DMA, H2-M3, WAS, DTX1, PLA2G5, IL2RG, CORO1A, H2-EA, H2-DMB1, UBD, CCL5, ST3GAL1, CD74, CD209B, PLA2G2D, H2-EB1, CDKN2A, TNFRSF9, NKXG7, H2-AA, IL7, IL2RB, KLRD1, KLRH1, H2-AB1                                                                                                                                                                                                                                                                                                                                                                                                     |
| GOTERM_BP_FAT | regulation of cell-cell adhesion             | 37    | 6.33E-15 | SASH3, CD274, AKNA, H2-DMA, GIMAP3, DTX1, PLA2G5, CD3E, IL2RG, ZDHHC2, CORO1A, ETS1, LGALS3, H2-EA, C1QTNF1, CASP3, CCL5, H2-DMB1, ZC3H12A, NFKB1Z, CD74, PLA2G2D, CD209B, H2-EB1, ITGA4, CDKN2A, TNFRSF9, RHOH, H2-AA, ASS1, ZAP70, IL7, LCK, CCL28, SKAP1, H2-AB1, IDO1                                                                                                                                                                                                                                                                                                                                                                                                                                                                                                                                          |
| GOTERM_BP_FAT | regulation of defense response               | 45    | 6.34E-15 | NLRX1, AKNA, H2-M3, CFI, GIMAP3, NOD1, PLA2G5, REG3G, USP18, ETS1, NT5E, CCL5, CASP4, ZC3H12A, NFKB1Z, DUOX2, SERPINB9B, GBP2, GBP4, MBL2, ZBP1, CD96, GPR17, CD74, GBP2B, PLA2G2D, APOBEC3, GPX2, GBP7, NOS2, IRGM2, TAP1, NKXG7, IFIT1BL1, TLR1, IGHG2B, ALOX5AP, IGTP, KLRD1, CD226, TRIM15, SH2D1B1, KLRH1, TLR2, IDO1                                                                                                                                                                                                                                                                                                                                                                                                                                                                                         |
| GOTERM_BP_FAT | cell killing                                 | 28    | 6.96E-15 | CXCL9, H2-M3, GIMAP3, REG3G, CORO1A, DEFA41, LGALS3, H2-EA, SERPINB9B, GBP2, MBL2, GBP2B, GBP7, NOS2, GZMA, DEFA5, IRGM2, GZMB, TAP1, NKXG7, DEFA34, UNC13D, IGTP, KLRD1, CD226, SH2D1B1, CCL28, KLRH1                                                                                                                                                                                                                                                                                                                                                                                                                                                                                                                                                                                                             |
| GOTERM_BP_FAT | adaptive immune response                     | 43    | 9.61E-15 | SASH3, CD274, SLFN2, H2-DMA, H2-M3, CFI, WAS, GIMAP3, MPTX2, CD3G, CD3E, SLA2, CD3D, IL18BP, C2, C4B, H2-EA, H2-DMB1, TRBC2, ZC3H12A, NFKB1Z, IGLC3, SERPINB9B, MBL2, CD74, H2-EB1, TRAT1, GZMB, TAP1, H2-AA, UNC13D, LAT2, IGHG2B, ZAP70, CD8A, CD7, IL2RB, KLRD1, CD226, CD247, SH2D1B1, SKAP1, H2-AB1                                                                                                                                                                                                                                                                                                                                                                                                                                                                                                           |

**B) The 20 most significant pathways downregulated in the ileum of PD-fed mice**

| Category     | Term                                         | Count | PValue   | Genes                                                                                                                         |
|--------------|----------------------------------------------|-------|----------|-------------------------------------------------------------------------------------------------------------------------------|
| KEGG_PATHWAY | Hematopoietic cell lineage                   | 15    | 3.40E-10 | H2-EB1, ITGA4, H2-DMA, CD3G, CD3E, H2-AA, CD3D, H2-EA, THPO, IL7, CD8A, H2-DMB1, CD7, CD38, H2-AB1                            |
| KEGG_PATHWAY | Th1 and Th2 cell differentiation             | 14    | 1.66E-09 | H2-EB1, H2-DMA, CD3G, CD3E, IL2RG, H2-AA, CD3D, H2-EA, ZAP70, LCK, H2-DMB1, IL2RB, CD247, H2-AB1                              |
| KEGG_PATHWAY | Th17 cell differentiation                    | 14    | 1.52E-08 | H2-EB1, H2-DMA, CD3G, CD3E, IL2RG, H2-AA, CD3D, H2-EA, ZAP70, LCK, H2-DMB1, IL2RB, CD247, H2-AB1                              |
| KEGG_PATHWAY | Staphylococcus aureus infection              | 15    | 2.10E-08 | H2-EB1, SELPLG, H2-DMA, CFI, DEFA5, DEFA36, DEFA34, H2-AA, C2, DEFA41, C4B, H2-EA, H2-DMB1, MBL2, H2-AB1                      |
| KEGG_PATHWAY | Antigen processing and presentation          | 13    | 2.39E-08 | CD74, CIITA, H2-EB1, H2-DMA, H2-M3, TAP1, H2-AA, H2-EA, CD8A, H2-DMB1, KLRD1, LGMN, H2-AB1                                    |
| KEGG_PATHWAY | Leishmaniasis                                | 11    | 1.89E-07 | H2-EA, H2-EB1, MARCKSL1, ITGA4, NOS2, H2-DMA, H2-DMB1, NCF4, H2-AA, H2-AB1, TLR2                                              |
| KEGG_PATHWAY | Intestinal immune network for IgA production | 9     | 4.06E-07 | H2-EA, PIGR, H2-EB1, ITGA4, H2-DMA, H2-DMB1, H2-AA, CCL28, H2-AB1                                                             |
| KEGG_PATHWAY | Human T-cell leukemia virus 1 infection      | 18    | 7.09E-07 | H2-EB1, MMP7, CDKN2A, H2-DMA, H2-M3, RASL2-9, ADCY4, CD3G, CD3E, IL2RG, H2-AA, CD3D, ETS1, H2-EA, LCK, H2-DMB1, IL2RB, H2-AB1 |
| KEGG_PATHWAY | Primary immunodeficiency                     | 8     | 1.62E-06 | ZAP70, CIITA, LCK, CD8A, TAP1, CD3E, IL2RG, CD3D                                                                              |
| KEGG_PATHWAY | Toxoplasmosis                                | 12    | 1.80E-06 | H2-EA, H2-EB1, CIITA, NOS2, H2-DMA, H2-DMB1, CASP3, IGTP, IRGM2, H2-AA, H2-AB1, TLR2                                          |
| KEGG_PATHWAY | Tuberculosis                                 | 14    | 8.07E-06 | CD74, CIITA, CD209B, H2-EB1, NOS2, H2-DMA, H2-AA, CORO1A, TLR1, H2-EA, CASP3, H2-DMB1, H2-AB1, TLR2                           |
| KEGG_PATHWAY | Graft-versus-host disease                    | 9     | 8.21E-06 | H2-EA, H2-EB1, H2-DMA, H2-DMB1, H2-M3, GZMB, KLRD1, H2-AA, H2-AB1                                                             |
| KEGG_PATHWAY | Cell adhesion molecules                      | 14    | 9.10E-06 | CD274, H2-EB1, SELPLG, ITGA4, H2-DMA, H2-M3, H2-AA, H2-EA, CD8A, H2-DMB1, SLITRK6, PECAM1, CD226, H2-AB1                      |
| KEGG_PATHWAY | Phagosome                                    | 13    | 4.51E-05 | CD209B, H2-EB1, H2-DMA, H2-M3, NCF4, TAP1, H2-AA, CORO1A, H2-EA, H2-DMB1, MBL2, H2-AB1, TLR2                                  |
| KEGG_PATHWAY | Asthma                                       | 6     | 4.66E-05 | H2-EA, H2-EB1, H2-DMA, H2-DMB1, H2-AA, H2-AB1                                                                                 |
| KEGG_PATHWAY | Inflammatory bowel disease                   | 8     | 6.67E-05 | H2-EA, H2-EB1, H2-DMA, H2-DMB1, IL2RG, H2-AA, H2-AB1, TLR2                                                                    |
| KEGG_PATHWAY | Allograft rejection                          | 8     | 7.40E-05 | H2-EA, H2-EB1, H2-DMA, H2-DMB1, H2-M3, GZMB, H2-AA, H2-AB1                                                                    |
| KEGG_PATHWAY | Epstein-Barr virus infection                 | 14    | 1.11E-04 | H2-EB1, H2-DMA, H2-M3, TAP1, CD3G, CD3E, H2-AA, CD3D, H2-EA, CASP3, H2-DMB1, CD247, H2-AB1, TLR2                              |
| KEGG_PATHWAY | Type I diabetes mellitus                     | 8     | 1.46E-04 | H2-EA, H2-EB1, H2-DMA, H2-DMB1, H2-M3, GZMB, H2-AA, H2-AB1                                                                    |
| KEGG_PATHWAY | Autoimmune thyroid disease                   | 8     | 3.11E-04 | H2-EA, H2-EB1, H2-DMA, H2-DMB1, H2-M3, GZMB, H2-AA, H2-AB1                                                                    |

**C) The 20 most significant GO terms upregulated in the ileum of PD-fed mice**

| Category      | Term                                           | Count | PValue   | Genes                                                                                                                                                                                                                                                                                                                                                                                                                                                                                                                                                                                                                                                                                  |
|---------------|------------------------------------------------|-------|----------|----------------------------------------------------------------------------------------------------------------------------------------------------------------------------------------------------------------------------------------------------------------------------------------------------------------------------------------------------------------------------------------------------------------------------------------------------------------------------------------------------------------------------------------------------------------------------------------------------------------------------------------------------------------------------------------|
| GOTERM_BP_FAT | lipid metabolic process                        | 90    | 6.41E-31 | ACAA2, ABCD3, AQP8, RDH7, ZBTB20, ACSM5, LIPA, PLB1, CES2B, EDNRB, CES2G, CYP4V3, PDK4, HMGCS2, SCD1, CD36, GAL3ST2, PDGFRB, PDGFRA, CUBN, SREBF1, ABCA8A, ABCA8B, CYP4A10, SPHK1, ACSL6, GIP, CYP2D26, ALDH3A2, RDH16F2, ALDH1A3, POR, BDH2, CYP2J13, CYP2U1, EHHADH, ALDH1A1, CAT, RGN, CYP2C40, ACOT2, ACOT1, TRIB3, ANGPTL4, GAL3ST2B, PPARA, LCT, SLC27A2, MGLL, B4GALT5, ACOT3, RETSAT, HSD17B4, GPD2, ACAA1B, HSD17B13, FITM2, AFP, LTC4S, PGTG51, CYP17A1, PGTG51, SEC14L2, ADH4, ADH1, HAO2, CCL21A, WNT4, ABCA1, CYP2J6, HSD3B3, EPHX2, CYP2J9, NR1D1, EFR3B, DHRS3, FABP1, FGF15, NCEH1, CYP2C23, FABP4, CYP2C66, AADAC, CES1D, CYP2C65, P2RX1, CES1G, PXPMP4, FGFR4, GSTM7 |
| GOTERM_BP_FAT | monocarboxylic acid metabolic process          | 61    | 4.54E-28 | ACAA2, ABCD3, ZBTB20, ACSM5, LIPA, CES2B, CES2G, CYP4V3, PDK4, ME1, UGT2A3, SCD1, CD36, SREBF1, ABCO2, CYP4A10, SPHK1, ACSL6, GIP, CYP2D26, ALDH3A2, RDH16F2, ALDH1A3, POR, BDH2, CYP2J13, CYP2U1, EHHADH, ALDH1A1, RGN, CYP2C40, ACOT2, ACOT1, TRIB3, PPARA, SLC27A2, MGLL, ACOT3, HSD17B4, SLC1A3, ACAA1B, LTC4S, PGTG51, ADH4, ADH1, HAO2, CYP2J6, EPHX2, CYP2J9, NR1D1, FABP1, FGF15, VNN1, CYP2C23, FABP4, CYP2C66, CES1D, CYP2C65, CES1G, FGFR4, GSTM7                                                                                                                                                                                                                           |
| GOTERM_BP_FAT | cellular lipid metabolic process               | 73    | 6.13E-27 | ACAA2, ABCD3, RDH7, ACSM5, LIPA, PLB1, CES2B, CES2G, CYP4V3, PDK4, HMGCS2, SCD1, CD36, GAL3ST2, PDGFRB, PDGFRA, SREBF1, ABCA8A, ABCA8B, CYP4A10, SPHK1, ACSL6, GIP, CYP2D26, ALDH3A2, RDH16F2, ALDH1A3, POR, BDH2, CYP2J13, CYP2U1, EHHADH, ALDH1A1, CAT, RGN, CYP2C40, ACOT2, ACOT1, TRIB3, GAL3ST2B, PPARA, LCT, SLC27A2, MGLL, B4GALT5, ACOT3, RETSAT, HSD17B4, ACAA1B, FITM2, LTC4S, PGTG51, ADH4, ADH1, HAO2, CCL21A, CYP2J6, EPHX2, CYP2J9, EFR3B, DHRS3, FABP1, NCEH1, CYP2C23, FABP4, CYP2C66, AADAC, CES1D, CYP2C65, P2RX1, CES1G, PXPMP4, GSTM7                                                                                                                              |
| GOTERM_BP_FAT | fatty acid metabolic process                   | 48    | 6.41E-25 | ABCD3, ACAA2, HSD17B4, ACAA1B, ACSM5, LTC4S, LIPA, PGTG51, CES2B, ADH4, CES2G, CYP4V3, PDK4, CD36, SCD1, HAO2, SREBF1, CYP2J6, EPHX2, SPHK1, CYP4A10, CYP2J9, ACSL6, GIP, CYP2D26, FABP1, ALDH3A2, POR, BDH2, CYP2C23, FABP4, CYP2C66, CYP2U1, CES1D, CYP2J13, CYP2C65, EHHADH, CES1G, ACOT2, RGN, CYP2C40, ACOT1, TRIB3, PPARA, GSTM7, SLC27A2, MGLL, ACOT3                                                                                                                                                                                                                                                                                                                           |
| GOTERM_BP_FAT | carboxylic acid metabolic process              | 65    | 4.91E-23 | ACAA2, ABCD3, ZBTB20, ACSM5, LIPA, CES2B, IYD, CES2G, CYP4V3, PDK4, ME1, UGT2A3, SCD1, CD36, SREBF1, ABCO2, CYP4A10, SPHK1, ACSL6, RENBP, GIP, CYP2D26, ALDH3A2, RDH16F2, ALDH1A3, POR, BDH2, CYP2J13, CYP2U1, TST, EHHADH, ALDH1A1, RGN, CYP2C40, ACOT2, ACOT1, TRIB3, PPARA, SLC27A2, MGLL, ACOT3, HSD17B4, SLC1A3, ACAA1B, NPL, LTC4S, PGTG51, ADH4, ADH1, HAO2, CYP2J6, EPHX2, CYP2J9, NR1D1, FABP1, FGF15, VNN1, CYP2C23, FABP4, CYP2C66, CES1D, CYP2C65, CES1G, FGFR4, GSTM7                                                                                                                                                                                                     |
| GOTERM_BP_FAT | oxoacid metabolic process                      | 67    | 1.44E-22 | ACAA2, ABCD3, ZBTB20, ACSM5, LIPA, CES2B, EDNRB, IYD, CES2G, CYP4V3, PDK4, ME1, UGT2A3, SCD1, CD36, SREBF1, ABCO2, CYP4A10, SPHK1, ACSL6, RENBP, GIP, CYP2D26, ALDH3A2, RDH16F2, ALDH1A3, POR, BDH2, CYP2J13, CYP2U1, TST, EHHADH, ALDH1A1, RGN, CYP2C40, ACOT2, ACOT1, TRIB3, PPARA, SLC27A2, MGLL, ACOT3, MTARC1, HSD17B4, SLC1A3, ACAA1B, NPL, LTC4S, PGTG51, ADH4, ADH1, HAO2, CYP2J6, EPHX2, CYP2J9, NR1D1, FABP1, FGF15, VNN1, CYP2C23, FABP4, CYP2C66, CES1D, CYP2C65, CES1G, FGFR4, GSTM7                                                                                                                                                                                      |
| GOTERM_BP_FAT | organic acid metabolic process                 | 67    | 3.22E-22 | ACAA2, ABCD3, ZBTB20, ACSM5, LIPA, CES2B, EDNRB, IYD, CES2G, CYP4V3, PDK4, ME1, UGT2A3, SCD1, CD36, SREBF1, ABCO2, CYP4A10, SPHK1, ACSL6, RENBP, GIP, CYP2D26, ALDH3A2, RDH16F2, ALDH1A3, POR, BDH2, CYP2J13, CYP2U1, TST, EHHADH, ALDH1A1, RGN, CYP2C40, ACOT2, ACOT1, TRIB3, PPARA, SLC27A2, MGLL, ACOT3, MTARC1, HSD17B4, SLC1A3, ACAA1B, NPL, LTC4S, PGTG51, ADH4, ADH1, HAO2, CYP2J6, EPHX2, CYP2J9, NR1D1, FABP1, FGF15, VNN1, CYP2C23, FABP4, CYP2C66, CES1D, CYP2C65, CES1G, FGFR4, GSTM7                                                                                                                                                                                      |
| GOTERM_BP_FAT | long-chain fatty acid metabolic process        | 23    | 3.81E-17 | ABCD3, CYP2J6, EPHX2, SPHK1, CYP4A10, CYP2J9, ACSL6, LTC4S, CYP2D26, PGTG51, CYP2C23, CYP2C66, CYP2J13, CYP2U1, CYP2C65, ACOT2, CYP2C40, ACOT1, CD36, GSTM7, SLC27A2, MGLL, ACOT3                                                                                                                                                                                                                                                                                                                                                                                                                                                                                                      |
| GOTERM_BP_FAT | lipid biosynthetic process                     | 42    | 1.93E-14 | ABCD3, AQP8, ZBTB20, HSD17B13, ACSM5, FITM2, LTC4S, HSD17B11, LIPA, CYP17A1, PGTG51, SEC14L2, PDK4, HMGCS2, SCD1, GAL3ST2, WNT4, SREBF1, ABCA8A, HSD3B3, ABCA8B, SPHK1, ACSL6, NR1D1, GIP, RDH16F2, ALDH1A3, FGF15, POR, CES1D, P2RX1, CES1G, ALDH1A1, RGN, TRIB3, PPARA, GAL3ST2B, FGFR4, GSTM7, SLC27A2, MGLL, B4GALT5                                                                                                                                                                                                                                                                                                                                                               |
| GOTERM_BP_FAT | regulation of hormone levels                   | 40    | 1.06E-13 | SLC22A3, RETSAT, RDH7, WNK4, ITPR1, HSD17B4, SLC2A2, AFP, HSD17B11, PLB1, CYP17A1, PGTG51, GHR, NEUROD1, ADH4, ADH1, GJA1, EDNRB, CLTRN, IYD, WNT4, CHST8, GPR39, PDGFRA, SREBF1, ABCO2, HSD3B3, FZD4, OPRK1, NR1D1, DHRS3, GIP, RDH16F2, ALDH1A3, SFRP1, POR, SLC7A8, ALDH1A1, NMU, FGFR4                                                                                                                                                                                                                                                                                                                                                                                             |
| GOTERM_BP_FAT | organic hydroxy compound metabolic process     | 36    | 2.41E-13 | ABCD3, MAOB, RETSAT, AQP8, RDH7, ACAA1B, LIPA, SLC6A3, PLB1, SEC14L2, ADH4, ADH1, EDNRB, IYD, HMGCS2, HAO2, WNT4, ABCA1, CUBN, SREBF1, SPHK1, NR1D1, DHRS3, ALDH3A2, RDH16F2, ALDH1A3, FGF15, POR, CES1D, CAT, CES1G, ALDH1A1, FGFR4, LCT, SLC27A2, ALDH1A7                                                                                                                                                                                                                                                                                                                                                                                                                            |
| GOTERM_BP_FAT | steroid metabolic process                      | 29    | 1.12E-12 | ABCD3, AQP8, RDH7, HSD17B4, ACAA1B, AFP, HSD17B11, LIPA, CYP17A1, SEC14L2, EDNRB, HMGCS2, SCD1, WNT4, ABCA1, PDGFRA, CUBN, SREBF1, HSD3B3, EPHX2, NR1D1, RDH16F2, FGF15, POR, CES1D, CAT, CES1G, FGFR4, SLC27A2                                                                                                                                                                                                                                                                                                                                                                                                                                                                        |
| GOTERM_BP_FAT | regulation of lipid metabolic process          | 31    | 3.72E-12 | AQP8, ZBTB20, HSD17B13, FITM2, CYP17A1, SEC14L2, PDK4, CD36, SCD1, CCL21A, WNT4, PDGFRB, GPR39, PDGFRA, SREBF1, EPHX2, SPHK1, NR1D1, GIP, FABP1, RDH16F2, FGF15, POR, CES1D, AADAC, CES1G, RGN, TRIB3, ANGPTL4, PPARA, FGFR4                                                                                                                                                                                                                                                                                                                                                                                                                                                           |
| GOTERM_BP_FAT | response to xenobiotic stimulus                | 33    | 1.27E-11 | ABCD3, MAOB, WNK4, SLC1A3, ACAA1B, LIPA, SLC6A3, CRYZ, NEUROD1, NCAM1, HMGCS2, BCHE, SREBF1, ABCO2, CYP2J6, CYP2J9, MMP9, GIP, CYP2D26, SFRP1, POR, NCEH1, CYP2C23, CYP2C66, CYP2U1, CYP2J13, CYP2C65, CAT, ALDH1A1, CYP2C40, PLIN2, LCT, GSTM7                                                                                                                                                                                                                                                                                                                                                                                                                                        |
| GOTERM_BP_FAT | positive regulation of lipid metabolic process | 21    | 5.55E-11 | PDGFRB, PDGFRA, SREBF1, ZBTB20, HSD17B13, NR1D1, CYP17A1, FABP1, SEC14L2, RDH16F2, POR, AADAC, CES1D, CES1G, RGN, CD36, ANGPTL4, SCD1, PPARA, CCL21A, WNT4                                                                                                                                                                                                                                                                                                                                                                                                                                                                                                                             |
| GOTERM_BP_FAT | unsaturated fatty acid metabolic process       | 19    | 1.07E-10 | CYP2J6, EPHX2, SPHK1, CYP4A10, CYP2J9, LTC4S, CYP2D26, PGTG51, CES2B, CYP2C23, CYP2C66, CYP2J13, CYP2U1, CYP2C65, CES2G, CYP2C40, SCD1, GSTM7, MGLL                                                                                                                                                                                                                                                                                                                                                                                                                                                                                                                                    |
| GOTERM_BP_FAT | regulation of lipid biosynthetic process       | 21    | 2.57E-10 | SREBF1, AQP8, SPHK1, ZBTB20, HSD17B13, FITM2, NR1D1, GIP, CYP17A1, SEC14L2, RDH16F2, POR, FGF15, CES1D, CES1G, PDK4, RGN, TRIB3, PPARA, FGFR4, WNT4                                                                                                                                                                                                                                                                                                                                                                                                                                                                                                                                    |
| GOTERM_BP_FAT | cellular hormone metabolic process             | 17    | 2.74E-10 | PDGFRA, RETSAT, HSD3B3, RDH7, HSD17B4, AFP, HSD17B11, DHRS3, PLB1, CYP17A1, RDH16F2, ALDH1A3, ADH4, ADH1, EDNRB, ALDH1A1, WNT4                                                                                                                                                                                                                                                                                                                                                                                                                                                                                                                                                         |
| GOTERM_BP_FAT | hormone metabolic process                      | 21    | 6.69E-10 | CHST8, PDGFRA, RETSAT, HSD3B3, RDH7, HSD17B4, AFP, HSD17B11, DHRS3, PLB1, CYP17A1, GHR, RDH16F2, ALDH1A3, ADH4, ADH1, POR, EDNRB, IYD, ALDH1A1, WNT4                                                                                                                                                                                                                                                                                                                                                                                                                                                                                                                                   |
| GOTERM_BP_FAT | alcohol metabolic process                      | 24    | 9.59E-10 | ABCA1, CUBN, SREBF1, RETSAT, AQP8, SPHK1, RDH7, LIPA, DHRS3, PLB1, SEC14L2, ALDH3A2, RDH16F2, ALDH1A3, ADH4, ADH1, POR, CES1D, CAT, CES1G, ALDH1A1, HMGCS2, FGFR4, ALDH1A7                                                                                                                                                                                                                                                                                                                                                                                                                                                                                                             |

**D) The 20 most significant pathways upregulated in the ileum of PD-fed mice**

| Category     | Pathway                | Count | PValue   | Genes                                                                                                       |
|--------------|------------------------|-------|----------|-------------------------------------------------------------------------------------------------------------|
| KEGG_PATHWAY | PPAR signaling pathway | 15    | 5.63E-10 | CYP4A10, ACSL6, AQP7, ACAA1B, FABP1, FAPB4, EHHADH, ME1, PLIN2, HMGCS2, CD36, ANGPTL4, SCD1, PPARA, SLC27A2 |

|              |                                                  |    |          |                                                                                                                                                                                                                                                                                                                                                                                                                                    |
|--------------|--------------------------------------------------|----|----------|------------------------------------------------------------------------------------------------------------------------------------------------------------------------------------------------------------------------------------------------------------------------------------------------------------------------------------------------------------------------------------------------------------------------------------|
| KEGG_PATHWAY | Retinol metabolism                               | 15 | 1.82E-09 | RETSAT, CYP4A10, RDH7, DHRS3, RDH16F2, ALDH1A3, ADH4, ADH1, CYP2C23, CYP2C66, CYP2C65, ALDH1A1, CYP2C40, UGT2A3, ALDH1A7                                                                                                                                                                                                                                                                                                           |
| KEGG_PATHWAY | Arachidonic acid metabolism                      | 13 | 3.55E-08 | CYP2J6, EPHX2, CYP4A10, CYP2J9, LTC4S, PLB1, PTGS1, CYP2C23, CYP2C66, CYP2J13, CYP2U1, CYP2C65, CYP2C40                                                                                                                                                                                                                                                                                                                            |
| KEGG_PATHWAY | Metabolic pathways                               | 58 | 1.54E-07 | CDA, ACAA2, RDH7, ACSM5, SAT2, PLB1, ME1, UGT2A3, HMGCS2, SCD1, CHST8, GUCY1A1, CYP4A10, SPHK1, ACSL6, RENBP, ALDH3A2, RDH16F2, ALDH1A3, CYP2J13, CYP2U1, TST, EHHADH, ALDH1A1, CAT, RGN, CYP2C40, ACOT2, ACOT1, LCT, ALDH1A7, MGLL, B4GALT5, ACOT3, MAOB, HSD17B4, PLD4, ACAA1B, NPL, LTC4S, CYP17A1, PTGS1, ADH4, ADH1, PRDM16, HAO2, CYP2J6, HSD3B3, EPHX2, CYP2J9, BBOX1, DHRS3, VNN1, CYP2C23, CYP2C66, CYP2C65, GSTM7, GSTM6 |
| KEGG_PATHWAY | Fatty acid degradation                           | 9  | 3.77E-06 | ALDH3A2, ADH4, ADH1, ACAA2, CYP2U1, EHHADH, CYP4A10, ACSL6, ACAA1B                                                                                                                                                                                                                                                                                                                                                                 |
| KEGG_PATHWAY | Peroxisome                                       | 10 | 2.37E-05 | ABCD3, EHHADH, EPHX2, CAT, ACSL6, HSD17B4, PXMP4, ACAA1B, HAO2, SLC27A2                                                                                                                                                                                                                                                                                                                                                            |
| KEGG_PATHWAY | Linoleic acid metabolism                         | 8  | 2.94E-05 | CYP2C23, CYP2C66, CYP2J6, CYP2J13, CYP2C65, CYP2J9, CYP2C40, PLB1                                                                                                                                                                                                                                                                                                                                                                  |
| KEGG_PATHWAY | Serotonergic synapse                             | 11 | 1.28E-04 | CYP2C23, CYP2C66, MAOB, CYP2J6, CYP2J13, CYP2C65, CYP2J9, ITPR1, CYP2C40, CYP2D26, PTGS1                                                                                                                                                                                                                                                                                                                                           |
| KEGG_PATHWAY | Ovarian steroidogenesis                          | 8  | 1.34E-04 | CYP2J6, CYP2J13, HSD3B3, CYP2J9, ACOT2, ACOT1, CYP17A1, ACOT3                                                                                                                                                                                                                                                                                                                                                                      |
| KEGG_PATHWAY | Steroid hormone biosynthesis                     | 9  | 2.71E-04 | CYP2C23, CYP2C66, HSD3B3, CYP2C65, CYP2C40, UGT2A3, HSD17B11, CYP17A1, CYP2D26                                                                                                                                                                                                                                                                                                                                                     |
| KEGG_PATHWAY | Biosynthesis of unsaturated fatty acids          | 6  | 3.35E-04 | ACOT2, HSD17B4, ACOT1, ACAA1B, SCD1, ACOT3                                                                                                                                                                                                                                                                                                                                                                                         |
| KEGG_PATHWAY | Inflammatory mediator regulation of TRP channels | 10 | 4.85E-04 | CYP2C23, CYP2C66, CYP2J6, CYP2J13, CYP2C65, CYP4A10, CYP2J9, ITPR1, CYP2C40, IL1RAP                                                                                                                                                                                                                                                                                                                                                |
| KEGG_PATHWAY | Chemical carcinogenesis - DNA adducts            | 7  | 0.00411  | CYP2C23, CYP2C66, CYP2C65, CYP2C40, UGT2A3, GSTM7, GSTM6                                                                                                                                                                                                                                                                                                                                                                           |
| KEGG_PATHWAY | Fatty acid metabolism                            | 6  | 0.005189 | ACAA2, EHHADH, ACSL6, HSD17B4, ACAA1B, SCD1                                                                                                                                                                                                                                                                                                                                                                                        |
| KEGG_PATHWAY | Basal cell carcinoma                             | 6  | 0.005555 | BMP4, FZD2, GADD45B, FZD4, HHIP, WNT4                                                                                                                                                                                                                                                                                                                                                                                              |
| KEGG_PATHWAY | Drug metabolism - other enzymes                  | 7  | 0.006406 | CDA, CES2B, CES1D, CES2G, UGT2A3, GSTM7, GSTM6                                                                                                                                                                                                                                                                                                                                                                                     |
| KEGG_PATHWAY | Vitamin digestion and absorption                 | 4  | 0.008954 | CUBN, CBLIF, SLC23A1, PLB1                                                                                                                                                                                                                                                                                                                                                                                                         |
| KEGG_PATHWAY | Drug metabolism - cytochrome P450                | 6  | 0.009169 | ADH4, ADH1, MAOB, UGT2A3, GSTM7, GSTM6                                                                                                                                                                                                                                                                                                                                                                                             |
| KEGG_PATHWAY | Cholesterol metabolism                           | 5  | 0.012556 | ABCA1, NCEH1, ANGPTL4, CD36, LIPA                                                                                                                                                                                                                                                                                                                                                                                                  |
| KEGG_PATHWAY | ABC transporters                                 | 5  | 0.014356 | ABCA1, ABCD3, ABCC2, ABCA8A, ABCA8B                                                                                                                                                                                                                                                                                                                                                                                                |

Table S4. Enriched gene clusters in the duodenum of PD-fed mice

| A) The 20 most significant GO terms downregulated in the duodenum of PD-fed mice |                                                           |       |            |                                                                                                                                                                                                                                                                                                                                                                                |                 |            |
|----------------------------------------------------------------------------------|-----------------------------------------------------------|-------|------------|--------------------------------------------------------------------------------------------------------------------------------------------------------------------------------------------------------------------------------------------------------------------------------------------------------------------------------------------------------------------------------|-----------------|------------|
| Category                                                                         | Term                                                      | Count | PValue     | Genes                                                                                                                                                                                                                                                                                                                                                                          | Fold Enrichment | FDR        |
| GOTERM_BP_FAT                                                                    | GO:0002682~regulation of immune system process            | 49    | 8.93E-08   | FLT3, TMEM131L, SLA2, AQP3, MECOM, TRBC2, MYC, GPX2, TRIM62, PRKCH, EDN3, EREG, ZAP70, CD8A, KIT, CD226, DNASE1, TLR4, NBL1, SKAP1, SASH3, BLM, H2-DMA, 5730507C01RIK, CFI, DTX1, MPTX2, PLA2G5, REG3G, IL2RG, GRAMD4, CCL5, PCK1, CCL24, CAR2, FYB2, CDKN2A, TRAT1, BMX, MEIS2, H2-AA, MFHAS1, VNN1, SELL, KLRD1, CD247, KLRH1, ADA, H2-AB1                                   | 2.26468599      | 2.70E-05   |
| GOTERM_BP_FAT                                                                    | GO:0006629~lipid metabolic process                        | 47    | 1.11E-09   | SCARB1, AQP8, CYP3A11, MGST2, PLA2G5, SLA2, HSD17B11, AKR1B8, CYP17A1, CES2A, CES2B, HRH1, CES2C, CYP2C55, CYP2B10, PCK1, HAO2, ENPP7, GSTM4, GSTM2, GSTM1, UGT1A1, UGT2B38, CYP4A10, PLA2G4C, MBOAT1, ACOT12, PLAAT3, GPCPD1, BAAT, CYP2C29, CYP4F15, PLCB4, CYP2C66, ACOX2, GSTA3, CYP2C65, CES1F, GSTA1, KIT, CES1G, ALDH1A1, CYP1A1, UGT2B5, ACOT1, TLR4, ABCG1            | 2.676370387     | 5.85E-07   |
| GOTERM_BP_FAT                                                                    | GO:0006082~organic acid metabolic process                 | 41    | 2.63E-10   | CYP3A11, MGST2, GLYAT, PLA2G5, CES2A, CES2B, CES2C, CYP2C55, MYC, CYP2B10, SLC16A9, PCK1, HAO2, GSTM4, GSTM2, GSTM1, UGT1A1, BHMT1B, UGT2B38, CYP4A10, ACOT12, CTPS2, BAAT, CYP2C29, CYP4F15, VNN1, CYP2C66, ACOX2, TST, PSAT1, CYP2C65, CES1F, GSTA1, CES1G, ALDH1A1, CYP1A1, UGT2B5, SARDH, ACOT1, TLR4, ASPA                                                                | 3.103500113     | 2.23E-07   |
| GOTERM_BP_FAT                                                                    | GO:0019752~carboxylic acid metabolic process              | 40    | 5.75E-11   | CYP3A11, MGST2, GLYAT, PLA2G5, CES2A, CES2B, CES2C, CYP2C55, MYC, CYP2B10, PCK1, HAO2, GSTM4, GSTM2, GSTM1, UGT1A1, BHMT1B, UGT2B38, CYP4A10, ACOT12, CTPS2, BAAT, CYP2C29, CYP4F15, VNN1, CYP2C66, ACOX2, TST, PSAT1, CYP2C65, CES1F, GSTA1, CES1G, ALDH1A1, CYP1A1, UGT2B5, SARDH, ACOT1, TLR4, ASPA                                                                         | 3.334052439     | 8.88E-08   |
| GOTERM_BP_FAT                                                                    | GO:0043436~oxoacid metabolic process                      | 40    | 6.17E-10   | CYP3A11, MGST2, GLYAT, PLA2G5, CES2A, CES2B, CES2C, CYP2C55, MYC, CYP2B10, PCK1, HAO2, GSTM4, GSTM2, GSTM1, UGT1A1, BHMT1B, UGT2B38, CYP4A10, ACOT12, CTPS2, BAAT, CYP2C29, CYP4F15, VNN1, CYP2C66, ACOX2, TST, PSAT1, CYP2C65, CES1F, GSTA1, CES1G, ALDH1A1, CYP1A1, UGT2B5, SARDH, ACOT1, TLR4, ASPA                                                                         | 3.073075599     | 3.73E-07   |
| GOTERM_BP_FAT                                                                    | GO:0002684~positive regulation of immune system process   | 38    | 7.55E-07   | SASH3, BLM, H2-DMA, CFI, MPTX2, PLA2G5, REG3G, SLA2, IL2RG, GRAMD4, AQP3, CCL5, TRBC2, PCK1, CCL24, CAR2, TRIM62, FYB2, PRKCH, EDN3, TRAT1, BMX, H2-AA, EREG, MFHAS1, ZAP70, VNN1, SELL, CD8A, KIT, KLRD1, CD226, CD247, TLR4, SKAP1, KLRH1, ADA, H2-AB1                                                                                                                       | 2.431782131     | 2.00E-04   |
| GOTERM_BP_FAT                                                                    | GO:0044255~cellular lipid metabolic process               | 37    | 2.52E-08   | SCARB1, CYP3A11, MGST2, PLA2G5, SLA2, AKR1B8, CES2A, CES2B, CES2C, CYP2C55, CYP2B10, PCK1, HAO2, ENPP7, GSTM4, GSTM2, GSTM1, CYP4A10, PLA2G4C, MBOAT1, ACOT12, PLAAT3, GPCPD1, BAAT, CYP2C29, CYP4F15, CYP2C66, ACOX2, CYP2C65, CES1F, GSTA1, KIT, CES1G, ALDH1A1, CYP1A1, ACOT1, TLR4                                                                                         | 2.840097043     | 8.20E-06   |
| GOTERM_BP_FAT                                                                    | GO:0032787~monocarboxylic acid metabolic process          | 35    | 3.61E-12   | CYP3A11, MGST2, GLYAT, PLA2G5, CES2A, CES2B, CES2C, CYP2C55, MYC, CYP2B10, PCK1, HAO2, GSTM4, GSTM2, GSTM1, UGT1A1, UGT2B38, CYP4A10, MGST2, PLA2G5, CES2A, CES2B, CES2C, CYP2C55, CYP2B10, PCK1, HAO2, GSTM4, GSTM2, GSTM1, CYP4A10, ACOT12, BAAT, CYP2C29, CYP4F15, CYP2C66, ACOX2, CYP2C65, CES1F, GSTA1, CES1G, CYP1A1, ACOT1, TLR4                                        | 4.153975662     | 1.53E-08   |
| GOTERM_BP_FAT                                                                    | GO:0006631~fatty acid metabolic process                   | 26    | 4.60E-10   | GSTM4, GSTM3, GSTM2, BLM, GSTM1, UGT1A1, CDKN2A, UGT2B38, PDX1, CYP3A11, CYP2C29, GSTA5, CYP2C66, CYP2C55, GSTA3, CYP2C65, CYP2B10, MYC, GSTA1, ALDH1A1, CYP1A1, UGT2B5                                                                                                                                                                                                        | 4.616171792     | 3.25E-07   |
| GOTERM_BP_FAT                                                                    | GO:0009410~response to xenobiotic stimulus                | 22    | 8.07E-07   | GSTM4, GSTM3, GSTM2, BLM, GSTM1, UGT1A1, CDKN2A, UGT2B38, PDX1, CYP3A11, CYP2C29, GSTA5, CYP2C66, CYP2C55, GSTA3, CYP2C65, CYP2B10, MYC, GSTA1, ALDH1A1, CYP1A1, UGT2B5                                                                                                                                                                                                        | 3.625939295     | 2.01E-04   |
| GOTERM_BP_FAT                                                                    | GO:0071466~cellular response to xenobiotic stimulus       | 19    | 1.06E-10   | GSTM4, GSTM3, GSTM2, BLM, GSTM1, UGT1A1, UGT2B38, CYP3A11, CYP2C29, GSTA5, CYP2C66, CYP2C55, GSTA3, CYP2C65, CYP2B10, MYC, GSTA1, CYP1A1, UGT2B5                                                                                                                                                                                                                               | 7.40933618      | 1.12E-07   |
| GOTERM_BP_FAT                                                                    | GO:0008202~steroid metabolic process                      | 17    | 5.41E-06   | SCARB1, UGT1A1, UGT2B38, AQP8, CYP3A11, HSD17B11, BAAT, CYP17A1, HRH1, ACOX2, CYP2B10, CES1F, KIT, CES1G, CYP1A1, UGT2B5, ABCG1                                                                                                                                                                                                                                                | 4.035290643     | 0.00127089 |
| GOTERM_BP_FAT                                                                    | GO:0006805~xenobiotic metabolic process                   | 16    | 6.29E-11   | GSTM4, GSTM2, GSTM1, UGT1A1, UGT2B38, CYP3A11, CYP2C29, GSTA5, CYP2C66, CYP2C55, GSTA3, CYP2C65, CYP2B10, GSTA1, CYP1A1, UGT2B5                                                                                                                                                                                                                                                | 10.05492649     | 8.88E-08   |
| GOTERM_BP_FAT                                                                    | GO:0033559~unsaturated fatty acid metabolic process       | 16    | 1.64E-09   | GSTM2, GSTM1, CYP4A10, MGST2, PLA2G5, CYP2C29, CES2A, CYP4F15, CES2B, CES2C, CYP2C66, CYP2C55, CYP2C65, CYP2B10, GSTA1, TLR4                                                                                                                                                                                                                                                   | 7.986484472     | 7.71E-07   |
| GOTERM_BP_FAT                                                                    | GO:0030217~T cell differentiation                         | 16    | 7.00E-06   | SASH3, BLM, CDKN2A, FLT3, H2-DMA, DTX1, CD3G, TMEM131L, IL2RG, H2-AA, ZAP70, VNN1, CD8A, KIT, PCK1, ADA                                                                                                                                                                                                                                                                        | 4.197101449     | 0.00156025 |
| GOTERM_BP_FAT                                                                    | GO:0006690~icosanoid metabolic process                    | 15    | 2.70E-09   | GSTM1, CYP4A10, MGST2, PLA2G5, CYP2C29, CES2A, CYP4F15, CES2B, CES2C, CYP2C66, CYP2C55, CYP2C65, CYP2B10, GSTA1, TLR4                                                                                                                                                                                                                                                          | 8.508328628     | 1.13E-06   |
| GOTERM_BP_FAT                                                                    | GO:1901568~fatty acid derivative metabolic process        | 15    | 2.94E-09   | GSTM1, CYP4A10, MGST2, PLA2G5, CYP2C29, CES2A, CYP4F15, CES2B, CES2C, CYP2C66, CYP2C55, CYP2C65, CYP2B10, GSTA1, TLR4                                                                                                                                                                                                                                                          | 8.453436185     | 1.13E-06   |
| GOTERM_BP_FAT                                                                    | GO:0001676~long-chain fatty acid metabolic process        | 12    | 3.99E-07   | GSTM4, CYP4F15, GSTM2, GSTM1, CYP2C66, CYP2C55, CYP2C65, CYP2B10, CYP4A10, CYP1A1, ACOT1, CYP2C29                                                                                                                                                                                                                                                                              | 7.822582738     | 1.13E-04   |
| GOTERM_BP_FAT                                                                    | GO:0042178~xenobiotic catabolic process                   | 9     | 3.55E-09   | GSTM4, GSTM2, GSTA5, GSTM1, UGT1A1, CYP2B10, GSTA1, CYP1A1, CYP3A11                                                                                                                                                                                                                                                                                                            | 23.12263427     | 1.25E-06   |
| GOTERM_BP_FAT                                                                    | GO:0019755~one-carbon compound transport                  | 6     | 8.12E-06   | CAR2, AQP8, AQP7, AQP3, AQP1, CAR4                                                                                                                                                                                                                                                                                                                                             | 20.96452174     | 0.00171882 |
| B) The 20 most significant pathways downregulated in the duodenum of PD-fed mice |                                                           |       |            |                                                                                                                                                                                                                                                                                                                                                                                |                 |            |
| Category                                                                         | Pathway                                                   | Count | PValue     | Genes                                                                                                                                                                                                                                                                                                                                                                          | Fold Enrichment | FDR        |
| KEGG_PATHWAY                                                                     | mmu05204:Chemical carcinogenesis - DNA adducts            | 17    | 4.47E-14   | GSTM4, GSTM3, GSTM2, GSTM1, UGT1A1, UGT2B38, CYP3A11, MGST2, CYP2C29, GSTA5, CYP2C66, CYP2C55, GSTA3, CYP2C65, GSTA1, CYP1A1, UGT2B5                                                                                                                                                                                                                                           | 13.80987654     | 1.05E-11   |
| KEGG_PATHWAY                                                                     | mmu00983:Drug metabolism - other enzymes                  | 16    | 3.16E-12   | GSTM4, GSTM3, GSTM2, GSTM1, UGT1A1, UGT2B38, MGST2, TYMP, CES2A, CES2B, CES2C, GSTA5, GSTA3, CES1F, GSTA1, UGT2B5                                                                                                                                                                                                                                                              | 11.86731079     | 3.70E-10   |
| KEGG_PATHWAY                                                                     | mmu00980:Metabolism of xenobiotics by cytochrome P450     | 12    | 6.74E-09   | GSTM4, GSTM3, GSTM2, GSTA5, GSTM1, UGT1A1, GSTA3, UGT2B38, GSTA1, CYP1A1, UGT2B5, MGST2                                                                                                                                                                                                                                                                                        | 11.21704718     | 5.26E-07   |
| KEGG_PATHWAY                                                                     | mmu05207:Chemical carcinogenesis - receptor activation    | 18    | 2.40E-08   | GSTM4, GSTM3, GSTM2, PAQR7, GSTM1, UGT1A1, PAQR5, UGT2B38, ADCY4, CYP3A11, MGST2, GSTA5, GSTA3, CYP2B10, MYC, GSTA1, CYP1A1, UGT2B5                                                                                                                                                                                                                                            | 5.458962963     | 1.41E-06   |
| KEGG_PATHWAY                                                                     | mmu00982:Drug metabolism - cytochrome P450                | 11    | 6.58E-08   | GSTM4, GSTM3, GSTM2, GSTA5, GSTM1, UGT1A1, GSTA3, UGT2B38, GSTA1, UGT2B5, MGST2                                                                                                                                                                                                                                                                                                | 10.57193532     | 3.08E-06   |
| KEGG_PATHWAY                                                                     | mmu00140:Steroid hormone biosynthesis                     | 12    | 9.03E-08   | CYP2C66, UGT1A1, CYP2C55, CYP2C65, CYP2B10, UGT2B38, CYP1A1, CYP3A11, UGT2B5, HSD17B11, CYP2C29, CYP17A1                                                                                                                                                                                                                                                                       | 8.804778973     | 3.47E-06   |
| KEGG_PATHWAY                                                                     | mmu01100:Metabolic pathways                               | 50    | 1.04E-07   | CYP3A11, AKR1B8, HYKK, MECOM, CYP2B10, ENPP7, CAR4, GPX2, UGT1A1, CYP4A10, PLA2G4C, ACOT12, CTPS2, PLAAT3, BAAT, PLCB4, ACOX2, TST, BSGNT6, ALDH1A1, UGT2B5, ACOT1, ASPA, LIPID2, ADCY4, MGST2, PLA2G5, TYMP, CYP17A1, CYP2C55, PCK1, HAO2, GSTM4, GSTM3, CAR2, GSTM2, GSTM1, UGT2B38, MBOAT1, CYP2C29, GSTA5, VNN1, CYP2C66, PSAT1, GSTA3, CYP2C65, GSTA1, CYP1A1, SARDH, ADA | 2.107382243     | 3.47E-06   |
| KEGG_PATHWAY                                                                     | mmu00830:Retinol metabolism                               | 12    | 1.40E-07   | CYP2C66, UGT1A1, CYP2C55, CYP2C65, CYP2B10, CYP4A10, UGT2B38, ALDH1A1, CYP1A1, CYP3A11, UGT2B5, CYP2C29                                                                                                                                                                                                                                                                        | 8.441695304     | 4.10E-06   |
| KEGG_PATHWAY                                                                     | mmu00591:Lipoic acid metabolism                           | 8     | 6.99E-06   | CYP2C66, CYP2C55, CYP2C65, PLA2G4C, CYP3A11, PLAAT3, PLA2G5, CYP2C29                                                                                                                                                                                                                                                                                                           | 10.91792593     | 1.82E-04   |
| KEGG_PATHWAY                                                                     | mmu00480:Glutathione metabolism                           | 9     | 8.90E-06   | GSTM4, GSTM3, GPX2, GSTM2, GSTA5, GSTM1, GSTA3, GSTA1, MGST2                                                                                                                                                                                                                                                                                                                   | 8.52962963      | 2.08E-04   |
| KEGG_PATHWAY                                                                     | mmu01524:Platinum drug resistance                         | 9     | 1.95E-05   | GSTM4, GSTM3, GSTM2, GSTA5, GSTM1, CDKN2A, GSTA3, GSTA1, MGST2                                                                                                                                                                                                                                                                                                                 | 7.676666667     | 4.16E-04   |
| KEGG_PATHWAY                                                                     | mmu00590:Arachidonic acid metabolism                      | 9     | 3.05E-05   | CYP2C66, CYP2C55, CYP2C65, CYP2B10, CYP4A10, PLA2G4C, PLAAT3, PLA2G5, CYP2C29                                                                                                                                                                                                                                                                                                  | 7.225098039     | 5.95E-04   |
| KEGG_PATHWAY                                                                     | mmu04750:Inflammatory mediator regulation of TRP channels | 10    | 9.27E-05   | HRH1, PRKCH, PLCB4, CYP2C66, CYP2C55, CYP2C65, CYP4A10, PLA2G4C, ADCY4, CYP2C29                                                                                                                                                                                                                                                                                                | 5.372995042     | 0.00164431 |
| KEGG_PATHWAY                                                                     | mmu04976:Bile secretion                                   | 9     | 9.84E-05   | SCARB1, CAR2, UGT1A1, AQP8, UGT2B38, UGT2B5, ADCY4, BAAT, AQP1                                                                                                                                                                                                                                                                                                                 | 6.141333333     | 0.00164431 |
| KEGG_PATHWAY                                                                     | mmu05225:Hepatocellular carcinoma                         | 11    | 2.16E-04   | GSTM4, GSTM3, GSTM2, FZD2, GSTA5, GSTM1, CDKN2A, GSTA3, MYC, GSTA1, MGST2                                                                                                                                                                                                                                                                                                      | 4.313835675     | 0.00337247 |
| KEGG_PATHWAY                                                                     | mmu04964:Proximal tubule bicarbonate reclamation          | 5     | 2.55E-04   | CAR2, SLC38A3, PCK1, AQP1, CAR4                                                                                                                                                                                                                                                                                                                                                | 15.50841751     | 0.00373665 |
| KEGG_PATHWAY                                                                     | mmu04640:Hematopoietic cell lineage                       | 8     | 4.21E-04   | CD8A, FLT3, H2-DMA, CD7, KIT, CD3G, H2-AA, H2-AB1                                                                                                                                                                                                                                                                                                                              | 5.807407407     | 0.00579787 |
| KEGG_PATHWAY                                                                     | mmu04658:Th1 and Th2 cell differentiation                 | 7     | 0.00172961 | ZAP70, H2-DMA, CD3G, CD247, IL2RG, H2-AA, H2-AB1                                                                                                                                                                                                                                                                                                                               | 5.427946128     | 0.02164754 |
| KEGG_PATHWAY                                                                     | mmu05340:Primary immunodeficiency                         | 5     | 0.00175771 | ZAP70, CITA, CD8A, IL2RG, ADA                                                                                                                                                                                                                                                                                                                                                  | 9.477366255     | 0.02164754 |
| KEGG_PATHWAY                                                                     | mmu04913:Ovarian steroidogenesis                          | 6     | 0.00216135 | SCARB1, PLA2G4C, CYP1A1, ADCY4, ACOT1, CYP17A1                                                                                                                                                                                                                                                                                                                                 | 6.498765432     | 0.02451721 |
| C) The 20 most significant GO terms upregulated in the duodenum of PD-fed mice   |                                                           |       |            |                                                                                                                                                                                                                                                                                                                                                                                |                 |            |
| Category                                                                         | Term                                                      | Count | PValue     | Genes                                                                                                                                                                                                                                                                                                                                                                          | Fold Enrichment | FDR        |
| GOTERM_BP_FAT                                                                    | GO:0048585~negative regulation of response to stimulus    | 38    | 4.02E-05   | RIPOR1, NLRX1, SERPINE2, INSIG1, USP18, LTBP1, ARHGAP35, SLC6A3, RGS4, RGS5, IL1R1, IL1A1, RNFP213, TKFC, FGF9, PIP4K2B, CD8A, WNT3, GBBP3, DUSP3, HEG1, FST, APOA2, WTP1, DUSP8, MMP9, TBX2, ENTREP1, SFRP1, SLC6A9, ERCC4, WNK2, SPRY1, RGS7BP, SH2D1B1, FBP1, H2-Q10, PPARD                                                                                                 | 2.02723845      | 0.16669511 |

|               |                                                                    |    |           |                                                                                                                                                                                                                                                                                                                                                                                                                                     |             |            |
|---------------|--------------------------------------------------------------------|----|-----------|-------------------------------------------------------------------------------------------------------------------------------------------------------------------------------------------------------------------------------------------------------------------------------------------------------------------------------------------------------------------------------------------------------------------------------------|-------------|------------|
| GOTERM_BP_FAT | GO:0051240~positive regulation of multicellular organismal process | 41 | 9.45E-05  | NLRX1, BEX1, SERPINE2, CLEC4N, AMIGO2, NOD1, HAPLN4, LTBP1, ARHGAP35, SLC6A3, BICRA, RGS4, IL1RL1, GJA1, C6, TKFC, FGF9, P2RY2, SH3PX2B, ENPP4, CD34, WNT3, PDGFRB, CADM1, TNFRSF12A, TRPA1, GP1BB, TNFSF15, HEG1, FST, APOA2, ACSL6, NPNT, MMP9, ZDHHC15, TBX2, ID2, SPRY1, TEK, H2-Q10, TLR2                                                                                                                                      | 1.88066438  | 0.16761821 |
| GOTERM_BP_FAT | GO:0065009~regulation of molecular function                        | 47 | 1.48E-04  | RIPOR1, PARM1, SERPINE2, TRIM30C, RASL2-9, DCUN1D2, NOD1, NTS, SLC5A3, ARHGAP35, IFIT2, RGS4, DUSP12, GJA1, CLTRN, PIP4K2B, RALGPS1, TBC1D16, PDGFRB, R3HDM1, DUSP3, TNFSF15, HEG1, APOA2, TRAPP3, NPNT, MMP9, RENBP, SLC8A3, SGSM1, SFRP1, FABP4, SLC6A9, ERCC4, WNK2, ID2, NOS1AP, ATP13A2, NAF1, SPRY1, ALDOB, TEK, DCP1A, PLCD1, PPARD, TLR2, HCN1                                                                              | 1.74156584  | 0.16761821 |
| GOTERM_BP_FAT | GO:0031349~positive regulation of defense response                 | 16 | 1.62E-04  | NLRX1, CADM1, CLEC4N, TRIM30C, TRIL, NOD1, IGHG2B, IL1RL1, GJA1, TKFC, FABP4, EP05, SH2D1B1, H2-Q10, TLR2, GBP3                                                                                                                                                                                                                                                                                                                     | 3.18273267  | 0.16761821 |
| GOTERM_BP_FAT | GO:0010038~response to metal ion                                   | 14 | 3.35E-04  | CPNE8, DNMT3A, MT2, MMP9, SLC6A3, FABP4, AKR1C14, ID2, ATP13A2, ALDOB, SLC25A23, FBP1, PLCD1, HCN1                                                                                                                                                                                                                                                                                                                                  | 3.30910588  | 0.20059627 |
| GOTERM_BP_FAT | GO:0051050~positive regulation of transport                        | 25 | 4.60E-04  | RIPOR1, RASL2-9, SLC2A2, PTPN23, ERFE, GJA1, CLTRN, KIF3A, P2RY2, CD34, PDGFRB, TRPA1, ABCA8A, APOA2, ACSL6, IGHG2B, SLC6A9, WNK2, IAPP, ATP13A2, TEK, PLCD1, PPARD, TLR2, HCN1                                                                                                                                                                                                                                                     | 2.18190704  | 0.20059627 |
| GOTERM_BP_FAT | GO:0048584~positive regulation of response to stimulus             | 46 | 4.64E-04  | H2-T24, NLRX1, CLEC4N, TRIM30C, TRIL, SLC2A2, NOD1, NTS, NID1, ERFE, RGS4, IL1RL1, GJA1, C6, TKFC, FGF9, EP05, IGLC1, ENPP4, WNT3, GBP3, EDARADD, PDGFRB, GUCY1A1, DUSP3, CADM1, TNFRSF12A, TRPA1, GP1BB, TNFSF15, DNMT3A, NPNT, MMP9, IGHG2B, SFRP1, FABP4, CFHR2, WNK2, AKR1C14, IAPP, SH2D1B1, TEK, H2-Q10, PPARD, TLR2, C1QC                                                                                                    | 1.66941113  | 0.20059627 |
| GOTERM_BP_FAT | GO:0003013~circulatory system process                              | 16 | 4.88E-04  | GUCY1A1, HEG1, SLC2A5, NTS, ARHGAP35, TBX2, RGS4, GJA1, TMEM65, P2RY2, ID2, NOS1AP, E2F4, CD34, PPARD, HCN1                                                                                                                                                                                                                                                                                                                         | 2.86502674  | 0.20059627 |
| GOTERM_BP_FAT | GO:0015711~organic anion transport                                 | 15 | 5.42E-04  | SLC10A2, ACSL6, APOA2, SLC2A2, PCTP, ERFE, SLC16A13, RGS4, GJA1, FABP4, SLC6A9, CLTRN, P2RY2, SLC25A23, PPARD                                                                                                                                                                                                                                                                                                                       | 2.97791502  | 0.20059627 |
| GOTERM_BP_FAT | GO:0032101~regulation of response to external stimulus             | 22 | 6.65E-04  | PDGFRB, NLRX1, DUSP3, SERPINE2, GP1BB, TRIM30C, NOD1, USP18, SLC6A3, IGHG2B, IL1RL1, GJA1, C6, TKFC, FABP4, CFHR2, ENPP4, CD34, WNT3, H2-Q10, PPARD, TLR2                                                                                                                                                                                                                                                                           | 2.27601442  | 0.20059627 |
| GOTERM_BP_FAT | GO:0006000~fructose metabolic process                              | 4  | 7.00E-04  | ALDOART1, TKFC, ALDOB, FBP1                                                                                                                                                                                                                                                                                                                                                                                                         | 22.32333333 | 0.20059627 |
| GOTERM_BP_FAT | GO:0023051~regulation of signaling                                 | 58 | 7.04E-04  | RIPOR1, SERPINE2, CLEC4N, TRIM30C, SLC2A2, PTPN23, ERFE, ARHGAP35, RGS4, RGS5, GJA1, FGF9, PIP4K2B, RALGPS1, PDGFRB, EDARADD, GUCY1A1, DUSP3, TNFRSF12A, HEG1, FST, DUSP8, NPNT, MMP9, SFRP1, AKR1C14, IAPP, RGS7BP, SH2D1B1, FBP1, TLR2, PPARD, NPNT, NLRX1, INSIG1, NOD1, NID1, NTS, CPLX2, USP18, LTBP1, RNF213, TKFC, TMEM65, P2RY2, WNT3, TBC1D16, GBP3, TRPA1, TNFSF15, WTIP, SLC8A3, ENTREP1, SLC6A9, WNK2, SPRY1, TEK, HCN1 | 1.51689404  | 0.20059627 |
| GOTERM_BP_FAT | GO:0006820~anion transport                                         | 17 | 7.09E-04  | TRPA1, SLC10A2, ACSL6, ANO8, APOA2, SLC2A2, PCTP, ERFE, SLC16A13, RGS4, GJA1, FABP4, SLC6A9, CLTRN, P2RY2, SLC25A23, PPARD                                                                                                                                                                                                                                                                                                          | 2.65176242  | 0.20059627 |
| GOTERM_BP_FAT | GO:0045089~positive regulation of innate immune response           | 12 | 7.48E-04  | NLRX1, TKFC, CADM1, CLEC4N, TRIM30C, TRIL, EP05, NOD1, SH2D1B1, H2-Q10, TLR2, GBP3                                                                                                                                                                                                                                                                                                                                                  | 3.45404012  | 0.20059627 |
| GOTERM_BP_FAT | GO:0001501~skeletal system development                             | 16 | 8.38E-04  | PDGFRB, FBXW4, RARG, CADM1, GP1BB, FST, INSIG1, HAPLN4, MMP9, GJA1, SFRP1, FGF9, BGLAP3, SH3PX2B, POC1A, PLS3                                                                                                                                                                                                                                                                                                                       | 2.71959391  | 0.20059627 |
| GOTERM_BP_FAT | GO:0044724~single-organism carbohydrate catabolic process          | 8  | 9.46E-04  | MGAM, ALDOART1, G6PC, TKFC, ALDOB, SIS, FBP1, XYL                                                                                                                                                                                                                                                                                                                                                                                   | 5.15153846  | 0.20059627 |
| GOTERM_BP_FAT | GO:0031347~regulation of defense response                          | 20 | 9.52E-04  | NLRX1, CADM1, CLEC4N, TRIM30C, TRIL, NOD1, USP18, IGHG2B, IL1RL1, GJA1, C6, TKFC, FABP4, CFHR2, EP05, SH2D1B1, H2-Q10, PPARD, TLR2, GBP3                                                                                                                                                                                                                                                                                            | 2.33344948  | 0.20059627 |
| GOTERM_BP_FAT | GO:0009968~negative regulation of signal transduction              | 27 | 9.64E-04  | RIPOR1, NLRX1, SERPINE2, INSIG1, USP18, LTBP1, ARHGAP35, RGS4, RGS5, RNF213, TKFC, FGF9, PIP4K2B, GBP3, DUSP3, HEG1, FST, WTIP, DUSP8, MMP9, ENTREP1, SFRP1, SLC6A9, WNK2, SPRY1, RGS7BP, FBP1                                                                                                                                                                                                                                      | 1.99432721  | 0.20059627 |
| GOTERM_BP_FAT | GO:0010648~negative regulation of cell communication               | 29 | 0.0010116 | RIPOR1, NLRX1, SERPINE2, INSIG1, USP18, LTBP1, ARHGAP35, RGS4, RGS5, GJA1, RNF213, TKFC, FGF9, PIP4K2B, GBP3, DUSP3, HEG1, FST, WTIP, DUSP8, MMP9, ENTREP1, SFRP1, SLC6A9, WNK2, SPRY1, RGS7BP, FBP1, HCN1                                                                                                                                                                                                                          | 1.92417107  | 0.20059627 |
| GOTERM_BP_FAT | GO:0023057~negative regulation of signaling                        | 29 | 0.0010528 | RIPOR1, NLRX1, SERPINE2, INSIG1, USP18, LTBP1, ARHGAP35, RGS4, RGS5, GJA1, RNF213, TKFC, FGF9, PIP4K2B, GBP3, DUSP3, HEG1, FST, WTIP, DUSP8, MMP9, ENTREP1, SFRP1, SLC6A9, WNK2, SPRY1, RGS7BP, FBP1, HCN1                                                                                                                                                                                                                          | 1.91910079  | 0.20059627 |

**D) The 20 most significant pathways upregulated in the duodenum of PD-fed mice**

| Category     | Pathway                                        | Count | PValue     | Genes                                                                   | Fold Enrichment | FDR        |
|--------------|------------------------------------------------|-------|------------|-------------------------------------------------------------------------|-----------------|------------|
| KEGG_PATHWAY | mmu04973:Carbohydrate digestion and absorption | 5     | 0.00182973 | MGAM, G6PC, SLC2A2, SLC2A5, SIS                                         | 9.407679739     | 0.36594534 |
| KEGG_PATHWAY | mmu00051:Fructose and mannose metabolism       | 4     | 0.00702654 | ALDOART1, TKFC, ALDOB, FBP1                                             | 10.03485839     | 0.70265411 |
| KEGG_PATHWAY | mmu00010:Glycolysis / Gluconeogenesis          | 4     | 0.03698516 | ALDOART1, G6PC, ALDOB, FBP1                                             | 5.391864208     | 1          |
| KEGG_PATHWAY | mmu00052:Galactose metabolism                  | 3     | 0.04770677 | MGAM, G6PC, SIS                                                         | 8.466911765     | 1          |
| KEGG_PATHWAY | mmu00030:Pentose phosphate pathway             | 3     | 0.05042991 | ALDOART1, ALDOB, FBP1                                                   | 8.210338681     | 1          |
| KEGG_PATHWAY | mmu00500:Starch and sucrose metabolism         | 3     | 0.05320787 | MGAM, G6PC, SIS                                                         | 7.968858131     | 1          |
| KEGG_PATHWAY | mmu01100:Metabolic pathways                    | 25    | 0.06919559 | LIPT1, ALDOART1, UAP1, NPL, TKFC, DSEL, ENPP4, PIP4K2B, XYL, MGAM, GUCY | 1.39459119      | 1          |
| KEGG_PATHWAY | mmu03320:PPAR signaling pathway                | 4     | 0.07398627 | FABP4, ACSL6, APOA2, PPARD                                              | 4.059043842     | 1          |
| KEGG_PATHWAY | mmu04610:Complement and coagulation cascades   | 4     | 0.08404812 | C6, SERPINE2, CFHR2, C1QC                                               | 3.843137255     | 1          |
